# Supplementary material for: Genome-Wide Gene Expression Analysis of Bordetella pertussis Isolates Associated with a Resurgence in Pertussis: Elucidation of Factors Involved in the Increased Fitness of Epidemic Strains
Source: PLoS One. 2013 Jun 11;8(6):e66150. doi: 10.1371/journal.pone.0066150 (PMC3679012; doi:10.1371/journal.pone.0066150)
Supplement: Table S1 — Microarray gene expression data for all strains analyzed in this study. DNA microarray analysis was used to measure the mRNA levels in ptxP3 strains compared to mRNA levels in ptxP1 strains. Gene expression data were shown for all replicates for each individual strain (ptxP1 strains with a green column head and ptxP3 strains with red column head). The gene expression data were normalized to the expression of a BP0015 DNA-directed RNA polymerase beta chain in each microarray slide to compensate for variations between the slides. The average expression of each individual gene was calculated for all of the strains carrying the ptxP1 and ptxP3 alleles. P-values were calculated with one–way ANOVA statistical analysis (t-test), P-values lower than 0.05 were highlighted in green. The fold change in the ptxP3 and ptxP1 strains were calculated as described in materials and methods section. The false discovery rate (FDR) is shown. (XLSX) [file pone.0066150.s001.xlsx]

## Sheet: Sheet1
		Ratio of all genes to BP0015 in ptxP1 strains																																				Ratio of all genes to BP0015 in ptxP3 strains
GeneID		1949-B0558 A-ptxP1	1949-B0558 B-ptxP1	1949-B0558 B-ptxP1	1949-B0558 B-ptxP1	1949-B0558 C-ptxP1	1995-B0602 A-ptxP1	1995-B0602 B-ptxP1	1995-B0602 C-ptxP1	1995-B0602 C-ptxP1	1982-B0689 A-ptxP1	1982-B0689 B-ptxP1	1982-B0689 B-ptxP1	1982-B0689 C-ptxP1	1996-B0777 A-ptxP1	1996-B0777 B-ptxP1	1996-B0777 C-ptxP1	1996-B0777 C-ptxP1	1967-B1213 A-ptxP1	1967-B1213 B-ptxP1	1967-B1213 C-ptxP1	1999-B1834 A-ptxP1	1999-B1834 B-ptxP1	1999-B1834 C-ptxP1	1999-B1834 C-ptxP1	2000-B1878 D-ptxP1	2000-B1878 E-ptxP1	2000-B1878 F-ptxP1	2000-B1878 F-ptxP1	2008-B3234 A-ptxP1	2008-B3234 B-ptxP1	2008-B3234 C-ptxP1	2008-B3234 C-ptxP1	2008-B3265 A-ptxP1	2008-B3265 B-ptxP1	2008-B3265 B-pxP1	2008-B3265 C-ptxP1	1995-B0607 A-ptxP3	1995-B0607 B-ptxP3	1995-B0607 C-ptxP3	1995-B0607 C-ptxP3	2000-B1917 E-ptxP3	2000-B1917 F-ptxP3	2000-B1917 F-ptxP3	1988-B2973 A-ptxP3	1988-B2973 B-ptxP3	1988-B2973 B-ptxP3	1988-B2973 C-ptxP3	1988-B2973 C-ptxP3
BP0001	glucose inhibited division protein A	-0.0312	0.0285	-0.0204	-0.1419	-0.0244	-0.4605	-0.4085	0.024	-0.0832	-0.435	0.0283	0.1464	0.1727	0.0398	0.1615	0.0338	0.1304	-0.1302	-0.1367	-0.2298	-0.2841	-0.2235	0.4322	0.2106	-0.0158	-0.0239	0.2588	0.2255	-0.166	-0.1328	-0.092	0.4553	-0.0238	0.1541	0.048	-0.2174	-0.1539	0.0751	0.0875	0.2032	0.0088	-0.1258	-0.0981	-0.1344	0.2503	0.5153	-0.3804	0.2228
BP0002	glucose inhibited division protein B	0.0031	0.07	-0.1078	0.301	0.1006	-0.2504	-0.1534	0.2094	-0.2069	-0.3259	0.1421	0.0753	0.1387	0.1176	0.2009	0.1949	0.217	-0.0073	0.0525	-0.1853	-0.1008	0.0848	0.2527	0.4996	0.0423	-0.1595	0.0579	0.4872	-0.0442	-0.2226	0.2282	0.199	0.1542	0.0184	0.1048	0.0613	0.1021	0.0925	0.1991	0.4915	0.1463	0.0883	0.0992	0.1346	0.3468	0.3015	-0.1731	0.4005
BP0003	ParA family protein	0.0175	0.1401	0.4045	-0.1151	-0.0397	-0.2845	-0.1976	-0.1478	-0.1772	-0.0313	0.2355	0.1967	0.085	0.1223	0.0112	0.4826	-0.1335	0.0867	-0.2002	-0.1583	-0.4044	-0.188	0.1023	0.0574	0.0154	0.0092	-0.093	-0.0563	0.0289	-0.0124	0.3067	0.298	0.1294	0.0573	0.2998	-0.0042	-0.0523	-0.0007	-0.0404	-0.2211	0.0244	0.1502	-0.0202	0.0683	0.3652	0.6381	0.0058	-0.0113
BP0004	Putative acetyltransferase, GnaT family	0.2632	0.0564	0.5076	-0.3312	-0.0267	-0.4627	-0.5917	-0.5056	-0.1503	0.107	0.1495	0.44	0.2646	0.2423	0.1905	0.4826	-0.2471	0.2494	-0.0663	0.1388	-0.1336	-0.3166	-0.2653	-0.0737	-0.0289	-0.1362	0.0684	-0.098	0.2448	-0.2218	0.0272	0.2858	0.0791	0.4042	0.4028	-0.0504	0.1128	0.1745	0.1237	-0.0678	-0.2845	0.2951	0.0351	0.0722	0.4968	0.8559	0.3271	-0.1261
BP0005	probable chromosome partitioning protein ParB	0.1089	-0.1478	0.6084	-0.5526	0.1739	-0.1132	0.1601	-0.6204	-0.4088	-0.17	0.3524	0.3544	0.1752	0.0948	0.0704	0.2871	-0.3091	0.0146	-0.2231	0.1846	-0.3372	-0.0714	0.148	-0.0229	-0.0919	-0.0353	-0.0103	-0.2544	0.0432	0.0101	0.5601	0.2925	0.2289	0.4802	0.5802	-0.0293	0.0963	0.2333	0.1038	-0.2079	-0.0498	0.1358	-0.2584	0.1248	0.5796	0.8856	0.1528	-0.0029
BP0006	L-asparaginase II precursor (pseudogene)	0.175	0.1839	0.4481	-0.2378	0.2642	0.1637	-0.0014	-0.0605	-0.1366	0.0615	0.3389	0.196	0.2125	0.0769	0.1929	0.2751	0.0328	0.1788	0.0365	0.212	-0.0861	-0.1334	0.1506	0.1745	0.1022	-0.0463	0.0471	0.1182	0.141	0.1055	0.1897	0.2179	0.1872	0.3628	0.3057	-0.0372	0.3412	0.3957	0.2538	0.061	0.0606	0.1348	0.0038	0.4539	0.3998	0.6273	0.4058	0.1651
BP0007	elongation factor Tu	-0.1238	-0.1488	0.4809	-0.3695	-0.0863	-0.1221	-0.0049	-0.2134	0.129	-0.1946	0.2791	0.2545	0.5128	0.117	-0.1075	0.4905	-0.0643	0.0418	0.2055	0.548	-0.3795	-0.327	-0.1442	-0.0486	-0.2209	-0.3502	-0.0365	0.0221	-0.5079	0.1496	0.4494	-0.0066	0.1179	0.4139	0.2584	0.1406	-0.0739	0.1113	0.0691	0.1238	-0.1334	0.1917	0.1878	-0.0471	0.2547	0.4481	-0.094	0.2308
BP0008	preprotein translocase SecE subunit	0.2239	0.1827	0.2177	0.1463	0.2086	-0.0299	-0.062	0.1864	0.1394	-0.3143	0.0688	0.3387	0.2122	0.1281	0.0502	0.4866	0.1105	0.0554	0.0022	0.5173	0.209	-0.0115	0.0928	0.4156	0.2284	0.2392	0.0664	0.3353	-0.0498	0.153	0.5275	0.0016	0.0776	0.2664	0.251	-0.2377	0.0307	-0.0257	0.0331	0.2016	-0.0473	0.1738	0.1544	-0.1704	0.2672	0.4399	-0.2427	0.3457
BP0009	transcription antitermination protein NusG	0.0588	-0.0592	0.319	0.0234	0.1338	0.1224	-0.0418	-0.1159	0.003	-0.2469	0.2985	0.3447	0.3442	0.1843	-0.0144	-0.1808	-0.1769	0.1039	0.0961	0.4824	0.1308	-0.1986	-0.1961	0.1629	0.0873	-0.0568	0.0081	0.038	0.3788	0.3336	0.4353	0.0468	0.1098	0.3437	0.084	0.0637	0.2895	-0.0503	0.0275	-0.0218	-0.0868	0.2058	-0.0172	-0.1249	0.3341	0.3794	-0.2885	0.0604
BP0010	50S ribosomal protein L11	-0.2472	-0.0702	-0.0776	0.0015	-0.2944	-0.1547	-0.3515	0.1637	0.0039	-0.5109	-0.1431	0.1793	0.021	0.1984	-0.2021	0.1958	0.0192	-0.1867	-0.1915	-0.741	0.002	-0.4552	-0.3467	0.1478	-0.1494	0.2336	0.0358	0.1619	-0.0624	-0.0975	-0.049	-0.0186	-0.2568	-0.4211	0.0127	-0.2575	-0.2229	-0.1671	0.0367	0.1578	-0.31	0.3095	-0.0152	-0.3298	0.2195	-0.0206	-0.5456	0.1836
BP0011	50S ribosomal protein L1	0.0235	0.0813	0.3923	-0.3288	-0.1297	-0.213	-0.08	-0.1907	-0.0205	-0.2734	-0.0154	0.1914	0.3002	0.1239	-0.0877	0.8936	-0.1675	0.0591	-0.1004	-0.1216	0.0108	-0.4183	-0.2801	-0.0525	-0.2178	0.0312	0.0669	-0.3004	0.2411	-0.1364	0.047	0.098	-0.1911	-0.1118	0.1152	-0.1568	-0.0852	0.009	0.1024	-0.1971	-0.194	0.3714	-0.0964	-0.1622	0.2258	0.4897	-0.2618	-0.0495
BP0013	50S ribosomal protein L10	0.1127	0.1189	0.1929	-0.0847	0.176	0.1005	0.0698	0.2908	0.2947	-0.1509	0.0696	0.2434	0.3743	0.4412	0.1427	-0.2633	0.199	0.0182	0.3826	0.3075	0.4298	-0.3246	-0.2553	0.3468	0.1079	-0.0775	0.4529	0.3143	-0.0186	-0.0201	-0.1595	-0.2481	0.2296	0.6164	0.276	0.1856	0.263	0.3099	0.1404	0.1039	-0.1331	0.1631	0.1965	0.0621	-0.0628	-0.23	-0.194	0.3025
BP0014	50S ribosomal protein L7/L12	-0.3799	0.3368	0.1118	-0.0632	-0.032	0.0676	0.177	0.3303	-0.0747	-0.1568	-0.1097	-0.2836	0.6105	-0.3815	-0.1651	-0.1009	0.1671	-0.1817	-0.1199	0.0377	-0.4442	-0.2314	-0.1727	0.2119	-0.3039	-0.143	0.0225	0.3436	-0.7785	-0.0893	-0.2703	0.0649	0.1859	0.4348	0.3173	0.0726	0.3725	0.2988	0.5596	0.487	-0.0125	-0.3642	-0.2289	0.1328	-0.0319	0.3998	-0.1414	0.4842
BP0015	DNA-directed RNA polymerase beta chain	0	0	0	0	0	0	0	0	0	0	0	0	0	0	0	0	0	0	0	0	0	0	0	0	0	0	0	0	0	0	0	0	0	0	0	0	0	0	0	0	0	0	0	0	0	0	0	0
BP0016	DNA-directed RNA polymerase beta chain	-0.32	-0.0206	0.0628	-0.2628	-0.3002	-0.389	-0.3131	-0.0707	-0.2085	-0.4315	0.0033	-0.2204	0.0103	-0.2704	-0.2788	-0.3804	-0.2986	-0.4572	-0.4686	-0.1693	-0.2436	-0.1531	-0.1729	-0.0205	-0.4086	-0.4728	-0.2936	-0.1369	-0.5206	-0.3006	-0.0507	-0.0872	-0.2642	-0.3271	-0.1983	-0.1596	-0.2403	-0.0018	-0.1196	0.0169	-0.0434	-0.0676	-0.1603	0.0113	0.0236	0.2057	-0.4249	0.0856
BP0017	putative lipoprotein	0.0984	-0.2086	-0.3644	-0.2808	-0.129	-0.0664	-0.651	-0.3096	-0.2062	-0.0933	-0.1693	0.1301	-0.186	0.1152	-0.079	-0.2019	-0.4608	-0.3243	-0.1275	-0.6475	-0.3303	-0.2514	-0.4298	-0.2372	-0.2007	-0.3202	-0.3157	-0.4354	-0.0461	-0.2349	-0.5826	0.1089	0.0112	-0.3442	-0.718	-0.1278	-0.3443	-0.1275	-0.2438	-0.3696	-0.2648	0.2006	0.084	-0.2816	0.4891	0.0756	-0.0003	-0.6343
BP0018	putative membrane protein	0.0511	0.0606	0.4187	-0.2999	0.2003	-0.1795	0.1681	-0.346	-0.2314	-0.4837	0.3166	0.0903	0.1128	0.0687	0.0618	-0.3369	-0.0923	-0.0451	-0.0923	-0.192	-0.1662	-0.0256	0.4427	0.3427	0.0322	-0.0234	0.0411	-0.047	-0.0242	-0.1277	0.2565	0.3736	-0.0192	-0.1371	0.1919	-0.343	0.0869	0.2448	0.0276	0.0773	0.1866	0.0275	0.1346	-0.0708	0.528	0.6994	0.0489	0.2378
BP0019	probable two-component sensor protein (Pseudogene)	0.0984	-0.6033	-0.8417	-0.7766	0.11	-0.9163	-1.14	-1.18	-1.0506	-0.1701	-0.079	0.1874	-0.1731	0.2102	0.4496	-0.3388	-0.2301	-0.5328	-0.358	-0.5956	-0.3505	-0.806	-0.1822	-0.2352	-0.5298	-0.9228	-0.4546	-0.8875	0.2905	-0.5272	-0.4228	0.1864	-0.2156	-0.1348	0.0085	-0.2366	-0.2834	-0.6212	-0.9816	-0.8367	-0.705	0.3295	-0.5248	-0.3189	0.9279	0.7133	-0.4449	-0.8591
BP0020	putative peptidoglycan binding protein	-0.3484	0.0513	-0.3445	-0.1282	-0.2018	-0.3481	-0.6746	-0.5642	-0.4195	-0.3972	-0.0753	-0.1374	-0.0422	-0.1974	-0.2896	-0.291	-0.3632	-0.1364	-0.3886	-0.1963	-0.3644	-0.3118	-0.5437	-0.3348	-0.3509	-0.3938	-0.2397	-0.0047	-0.445	-0.5021	-0.5569	-0.1951	0.0251	-0.3131	-0.399	-0.3231	-0.0155	-0.0831	-0.4956	-0.2856	-0.3664	-0.205	-0.4085	-0.0574	0.1184	0.1033	-0.4194	-0.078
BP0021	probable two-component response regulator (Pseudogene)	0.18	-0.0733	0.0321	-0.5681	-0.1314	-0.5071	-0.7023	-0.7849	-0.8466	-0.0516	0.0272	0.1784	-0.0591	-0.0612	-0.1417	-0.0928	-0.4307	-0.2611	-0.491	-0.3231	-0.2581	-0.6073	-0.7277	-0.3985	-0.3058	-0.3385	-0.4461	-0.4943	0.0479	-0.3968	-0.2943	0.3262	-0.3721	-0.3101	-0.0291	-0.453	-0.3136	-0.3895	-0.4308	-0.6352	-0.9532	-0.0767	-0.487	-0.1926	0.503	0.4591	-0.0992	-0.4312
BP0022	Two-component response regulator	-0.2043	0.2039	-0.2541	0.1043	0.1998	-0.4043	-0.2975	0.5979	0.3401	-0.4873	0.0083	0.0551	-0.0589	0.2284	0.002	-0.0073	0.4048	0.3463	0.0341	-0.2985	0.0386	0.1027	0.5948	0.9523	0.2009	0.1777	0.5687	0.6003	-0.4602	-0.9079	-0.319	0.3465	0.531	0.1745	0.4982	0.0093	0.0445	0.6044	0.533	0.9163	0.5991	0.0874	0.6163	0.4512	0.4582	0.5174	0.2721	1.0311
BP0023	transposase	-0.2567	-0.5904	-0.8388	-0.6277	-0.2369	-0.7847	-1.2411	-0.2724	-0.3644	-0.4347	-0.0279	-0.1647	-0.1912	-0.2252	0.2375	1.4097	-0.2382	-0.5335	-0.293	-1.0666	-0.5393	-1.0795	-0.0354	0.2819	-0.6909	-0.7028	-0.9007	-0.3179	-0.2192	-0.4813	0.0403	0.3221	-0.2707	-0.1392	-0.0549	-0.1622	-0.5111	-0.7872	-0.7472	-0.3602	-1.0891	-0.2181	-0.3291	-0.5902	0.2782	0.5018	-0.871	-0.482
BP0024	putative racemase (Pseudogene)	0.5152	-0.0758	1.9338	-0.9911	-0.108	0.1555	0.1911	-1.0818	-0.3862	-0.6107	1.0995	0.2339	0.1338	0.2614	0.2592	0.6133	-0.6633	-0.183	-0.5549	0.4927	-0.3096	-0.6136	-0.0739	-0.308	-0.0449	0.9216	-0.3591	-0.9143	0.3714	-0.1209	1.1287	0.4491	-0.6484	0.4643	0.7456	-0.5062	-0.0863	0.1531	0.1714	-0.8777	-0.5074	0.4962	-0.4804	0.1163	0.6416	1.7559	0.4201	-0.6292
BP0025	conserved hypothetical protein	0.3141	0.4147	-0.1346	0.2184	0.266	-0.2642	-0.3379	-0.3146	-0.255	-0.4955	0.5959	0.4559	0.1733	0.1766	0.3615	0.2821	0.5894	-0.0561	-0.1015	0.6823	0.1728	0.1709	-0.0701	0.7186	0.3255	0.5128	-0.0491	0.6086	0.1987	-0.2777	0.2586	0.3815	-0.0823	0.3291	0.2979	0.0044	0.1792	0.4769	-0.2663	0.2794	-0.0683	0.5445	0.1394	0.7101	0.3742	0.1119	-0.3937	0.5443
BP0026	putative thiolase	0.473	-0.5564	-0.3296	-0.391	0.0215	-0.3156	-0.8977	-0.3535	-0.5985	-0.2701	0.3865	0.2629	0.0042	-0.1388	0.3887	1.0482	-0.0702	-0.4542	-0.5626	-0.0927	-0.354	-0.3293	0.0874	0.2072	-0.5299	-0.5147	-0.4402	-0.3818	-0.1572	-0.2176	-0.2017	-0.0091	-0.1836	0.2746	0.2514	-0.1483	-0.1469	-0.6107	-0.0412	-0.3137	-0.4464	0.2159	-0.5068	-0.3934	0.5274	0.6628	-0.2496	-0.0226
BP0027	MaoC family protein	0.5609	-0.0272	-0.1617	-0.2216	0.2538	-0.2773	-0.3855	-0.2054	-0.2383	0.2872	0.7591	0.7264	0.1828	0.2145	0.6843	0.2496	0.3693	-0.241	-0.02	0.2637	-0.1188	-0.1903	0.3548	0.2621	-0.0637	-0.1133	-0.1551	0.2256	0.0423	-0.2212	0.4147	0.225	0.1733	0.7322	0.1762	-0.1248	0.3863	0.2556	-0.3528	-0.2783	0.4984	0.1264	-0.0868	0.1532	0.7945	0.4467	-0.1573	0.1351
BP0028	putative transcriptional regulator	0.2329	0.7264	0.4306	0.6056	0.2913	0.4229	0.2905	0.1106	0.0319	0.3242	0.5219	0.5624	0.3714	0.4709	0.2676	-0.2377	0.2523	0.2144	0.0867	0.3349	0.3079	0.4728	0.8102	0.6281	0.2776	0.2793	0.6441	0.8771	0.3426	0.4851	0.3749	0.5579	0.4406	0.3386	0.2698	0.1536	0.5507	0.7072	0.6121	0.7958	0.5816	0.3056	0.5088	0.9028	0.4996	0.4162	0.4397	0.9168
BP0029	putative enoyl-CoA hydratase	0.1833	0.1881	-0.1499	-0.2171	-0.0558	-0.5055	-0.4031	-0.2249	0.1227	-0.5083	0.1647	-0.0682	0.0014	0.2717	0.1152	-0.3107	-0.0174	-0.0646	-0.0805	-0.4088	0.0171	-0.1262	-0.2417	0.4805	0.2034	0.1561	0.2229	-0.0452	0.1946	-0.0853	0.3069	0.2338	0.229	-0.2772	0.3608	0.1587	-0.0182	0.1302	-0.4584	0.0324	-0.206	0.4752	0.3573	0.2817	0.5787	0.5132	0.107	0.1987
BP0030	conserved hypothetical protein	0.1667	-0.3998	-0.2091	-0.4611	-0.012	-0.1707	-0.5091	-0.4251	0.219	0.0301	0.256	0.7013	0.2294	0.2218	0.6844	0.403	-0.2021	0.3865	0.1965	-0.5697	-0.0405	-0.3154	-0.5117	-0.3394	-0.1474	-0.4615	-0.0549	-0.1918	0.696	-0.2142	-0.175	0.4342	0.3552	0.206	0.3834	0.4736	0.0529	0.0392	0.1952	-0.0538	0.0244	0.5107	0.72	-0.1096	1.0346	0.9983	0.6008	-0.1953
BP0032	probable transporter	0.4575	-0.1915	-0.2033	-0.5079	0.0006	-0.5082	-0.7389	-0.364	-0.3628	-0.521	0.1286	0.2178	0.082	0.1563	0.3119	-0.1547	0.0385	-0.0782	-0.4517	0.0174	-0.2505	-0.2512	-0.0754	0.0623	-0.1306	-0.1143	-0.1894	-0.3494	0.2282	-0.4577	0.1816	0.2105	-0.1883	0.1365	0.2123	-0.316	-0.2294	-0.1147	-0.4161	-0.2646	-0.3085	0.1759	-0.3071	-0.1359	0.2983	0.4394	-0.3356	-0.3049
BP0033	glycyl-tRNA synthetase alpha chain	0.0229	0.1824	-0.0428	0.2242	0.0394	-0.2501	-0.043	0.3623	0.0418	-0.218	0.2815	0.1019	0.2008	0.1692	0.1567	0.0851	0.3588	0.1787	0.3236	-0.4076	-0.0358	-0.0111	-0.0537	0.471	0.0659	-0.0692	0.2543	0.5946	0.1115	0.1438	0.3159	-0.2297	0.4305	-0.2015	0.065	0.2009	0.1741	0.1869	0.2318	0.5291	-0.0082	0.3326	0.1369	-0.1188	0.0442	-0.2685	0.0442	0.4938
BP0034	glycyl-tRNA synthetase beta chain	0.147	0.1941	0.1565	-0.0956	0.0863	-0.2879	-0.0178	0.001	-0.0708	-0.1583	0.1351	0.2293	0.1094	0.1281	0.0311	-0.0854	0.0804	0.067	0.2446	-0.094	-0.2339	-0.304	-0.3018	0.2263	-0.074	-0.0436	0.1352	0.2101	0.1901	0.0993	0.1424	0.0871	0.1089	-0.117	0.2361	0.1331	0.1351	0.251	0.0201	0.0751	-0.143	0.3634	0.1842	-0.1531	0.424	0.2872	0.043	0.2821
BP0035	putative haloacid dehalogenase-like hydrolase	-0.4243	0.1102	0.0524	-0.0144	-0.2345	-0.1539	-0.3653	-0.1845	-0.1494	-0.1095	-0.1131	0.0007	-0.0401	0.181	0.0175	0.0485	0.2126	-0.0476	0.2228	-0.2544	-0.0212	0.0808	0.1986	0.4968	0.1042	-0.0914	0.2992	0.2956	0.0304	0.1527	-0.0814	0.4086	0.1474	-0.2699	0.0125	0.098	0.029	-0.0302	-0.0018	0.1776	0.0578	0.241	0.2474	0.118	0.4383	0.202	-0.1126	0.3023
BP0036	probable acyltransferase	0.049	-0.0381	0.0793	0.1344	0.2799	-0.2893	-0.2703	-0.1633	-0.1382	-0.1821	0.03	0.3098	0.0903	0.2426	0.2229	-0.314	0.1373	0.1662	0.2524	-0.2086	0.0764	-0.1342	0.0866	0.4604	0.1294	0.0446	0.2274	0.3633	0.2427	0.0091	0.2223	0.2199	0.1246	-0.0505	0.1735	-0.0338	0.1701	0.1236	0.0463	0.1287	-0.0416	0.1675	0.2499	0.3369	0.3545	0.1465	-0.0914	0.1824
BP0037	conserved hypothetical protein	0.1365	0.1754	-0.0611	0.0222	-0.016	-0.1995	-0.5224	-0.1325	-0.4177	-0.5303	0.043	0.0572	-0.015	0.2147	0.1505	-0.6216	0.1205	0.0229	0.1879	-0.481	-0.1166	-0.1554	0.0475	0.4809	-0.1708	-0.2727	-0.0434	0.1573	-0.0027	-0.0504	0.0546	0.3125	-0.091	-0.4061	0.0339	-0.1492	-0.0254	0.164	-0.0777	0.2524	-0.1079	0.1681	-0.0232	0.1502	0.6349	0.3472	-0.3371	0.3573
BP0038	lactoylglutathione lyase	-0.0318	-0.079	-0.5446	0.3457	-0.2265	-0.3044	-0.3636	0.2903	-0.007	-0.6004	-0.1248	0.0569	0.0434	-0.0046	-0.0655	-0.064	0.219	-0.1147	0.0256	-0.6678	-0.1902	0.0281	0.3861	0.5027	-0.1607	-0.135	-0.0513	0.3642	-0.0281	-0.0758	0.0122	0.0855	0.2076	-0.5322	-0.0067	-0.0237	-0.1404	-0.124	-0.1237	0.4855	-0.008	0.0577	0.06	-0.0153	0.0202	-0.2553	-0.2	0.464
BP0039	peptide deformylase	0.029	0.1603	-0.1804	-0.0952	0.1207	-0.3035	-0.1971	-0.0181	0.0685	-0.2743	0.189	0.3815	0.5195	0.2637	0.296	-0.7886	0.0083	0.0084	0.0569	-0.6276	-0.2556	-0.5404	-0.2637	0.2788	-0.0098	-0.1698	0.1845	-0.0678	0.3687	-0.1877	0.3114	0.2004	-0.0745	-0.4123	0.3512	-0.0123	-0.0354	0.3041	0.1663	0.226	-0.2314	0.5503	0.0687	0.0849	0.3631	0.2296	0.0364	0.2044
BP0042	putative lipase (Pseudogene)	-0.1877	-0.5324	-0.8453	-0.3724	-0.4391	-0.9233	-1.2914	-0.3945	-0.3886	-0.9234	-0.4868	-0.2051	-0.5948	-0.0811	-0.2784	-0.0289	-0.288	-0.226	-0.5454	-1.2744	-0.4543	-0.7304	-0.2057	-0.0377	-0.3794	-0.4561	-0.3347	-0.4076	-0.0613	-0.853	-0.2355	1.1998	-0.3358	-1.0479	-0.25	-0.5978	-0.4847	-0.4129	-0.5303	-0.2882	-0.571	-0.1339	-0.1064	-0.1508	1.2332	1.0689	-0.5494	-0.4053
BP0043	putative exported protein	0.2112	0.113	-0.0168	0.067	0.1019	-0.3883	-0.3305	0.0341	0.0576	0.1637	-0.1165	0.2186	-0.2718	0.1684	0.0069	-0.1003	0.2887	0.1994	-0.0084	-0.138	0.0987	0.1131	0.4138	0.285	0.1412	0.1136	-0.0459	0.2406	0.0032	-0.2002	-0.0444	0.2938	0.1461	0.1278	0.22	-0.059	0.1671	0.1843	0.0314	0.2508	0.2218	0.1941	0.3212	0.2148	0.3082	0.4414	0.0971	0.1306
BP0044	transcriptional regulator	0.0876	-0.5194	-0.872	-0.2686	-0.4908	-0.9712	-1.3995	-0.539	-0.9508	-0.8282	-0.1547	0.0589	-0.0596	0.0456	-0.0655	0.1359	0.0766	-0.2029	-0.2875	-0.3388	-0.258	-0.4355	-0.3863	0.2852	-0.2076	-0.129	0.0235	0.0269	-0.1513	-0.5093	0.3849	0.064	0.0505	-0.2532	-0.1052	-0.0743	-0.3558	-0.2696	-0.1494	-0.0697	-0.4953	0.0344	-0.345	-0.3938	0.2294	0.0214	-0.3719	-0.1282
BP0045	putative membrane protein	0.0237	-0.304	0.0482	0.1655	0.0225	-0.607	-0.5421	0.302	0.0229	-0.194	-0.0666	0.5945	-0.1203	0.4254	0.3431	-0.4857	0.1377	0.2438	0.0911	0.1094	0.0886	-0.249	0.1698	0.4222	-0.0617	0.1089	0.1765	0.1574	0.3147	-0.3683	-0.0141	0.3609	0.0606	0.15	0.3233	-0.1021	-0.0339	-0.0224	0.0743	0.4957	0.0112	0.4253	0.1908	-0.1137	0.6245	0.6755	-0.1889	0.2962
BP0046	probable malate/L-lactate dehydrogenase (Pseudogene)	0.2266	0.2071	0.3256	-0.0581	0.0806	-0.2791	-0.325	-0.4319	-0.5298	-0.2644	0.0873	0.1272	-0.0944	0.1249	-0.0287	-0.0108	-0.1928	0.2483	-0.0475	-0.4846	-0.0601	-0.0219	-0.1661	0.1507	0.0933	-0.1034	-0.0521	-0.0421	0.015	-0.3148	-0.3633	1.1289	0.1591	-0.2308	0.2315	-0.1565	0.134	0.1151	-0.042	-0.0654	0.0764	0.3552	0.1056	0.5908	0.9649	1.2716	0.009	0.1828
BP0047	homoserine O-acetyltransferase	0.2054	0.2796	0.3216	0.2572	0.2317	0.1013	0.2057	-0.0906	0.0056	0.1287	0.1375	0.3882	0.3543	0.3641	0.1499	-0.1232	-0.0717	0.3888	0.178	0.046	0.0079	-0.0418	-0.0035	0.2608	0.1132	0.0709	0.2545	0.1799	0.6007	0.1645	0.2243	-0.0007	0.1584	0.1529	0.2088	-0.0593	0.3012	0.3621	0.2639	0.3381	-0.0299	0.3261	0.2375	-0.2596	0.5875	0.3713	0.2669	0.2507
BP0048	conserved hypothetical protein	0.0521	0.1849	0.0796	0.1973	0.0123	-0.3979	-0.1694	0.0357	-0.0694	-0.2761	0.153	0.2018	0.1534	0.2211	-0.1048	-0.1113	0.1338	0.1681	0.051	-0.2271	0.0171	0.1912	0.159	0.616	0.2338	-0.0838	0.2293	0.4458	0.1626	-0.1465	-0.0477	0.4002	0.1644	0.0901	0.3353	-0.0436	0.1765	0.2786	0.1508	0.4679	0.119	0.3203	0.3674	0.033	0.4372	0.3695	-0.2774	0.4644
BP0049	transposase	-0.1404	-0.9453	-0.8887	-0.6574	-0.1884	-1.0723	-1.0448	-0.5564	-0.3369	-0.3918	0.2944	0.0269	-0.0318	-0.0255	0.5747	0.2288	0.1835	-0.4803	-0.2041	-1.0277	-0.3391	-1.0633	-0.0992	0.509	-0.79	-0.2202	-0.3623	-0.6301	-0.2469	-0.9678	-0.2792	0.2652	-0.2805	0.0568	0.2185	-0.106	-0.622	-0.7815	-0.6918	-0.3535	-1.2181	-0.2614	-0.3295	-0.5998	0.4562	0.8406	-1.1384	-0.4663
BP0050	putative integral membrane signal transducer protein	0.1047	-0.5036	-0.4425	-0.4748	-0.169	-0.4935	-0.7771	-0.4385	-0.5561	-0.4369	0.3639	0.308	0.0186	0.1491	0.5845	0.0891	-0.0166	-0.0027	0.1425	-0.0874	-0.1557	-0.1448	0.0391	0.242	0.0491	-0.0021	-0.0523	-0.0297	-0.0514	-0.7823	-0.1193	0.2313	-0.2133	-0.0972	-0.0077	0.0336	-0.2514	-0.4631	-0.4865	-0.2592	-0.0553	0.4311	0.1531	-0.2465	0.7415	0.5128	-0.4128	-0.2397
BP0051	outer membrane porin protein precursor (Pseudogene)	-0.1358	-0.2941	-0.0942	-0.4611	-0.1235	0.1918	0.0914	0.2434	0.1894	0.0788	0.0793	0.1916	0.2338	0.2549	0.1941	-0.0733	0.0245	0.2659	0.0363	-0.0698	0.1889	-0.0055	0.3505	0.339	0.137	0.0531	0.3019	0.2574	1.6014	1.3938	1.7119	0.3856	-0.0436	-0.0001	0.2336	0.0701	0.0372	0.106	-0.1593	0.0957	0.176	0.2893	0.1414	-0.0323	0.4151	0.5717	0.1311	0.1597
BP0053	putative aspartate/glutamate racemase	0.0015	-0.2236	-0.1005	-0.6108	-0.1846	-0.1875	-0.6088	-0.4589	-0.3781	-0.0476	0.2324	0.3068	-0.1223	0.0496	0.0515	-0.1582	-0.2498	-0.351	-0.1479	-0.4958	-0.5212	-0.7943	-0.4965	-0.0454	-0.0712	-0.3234	-0.2743	-0.7449	0.3256	-0.4696	-0.178	0.2448	-0.2448	-0.2877	0.1639	-0.1596	-0.0248	-0.3508	-0.516	-0.324	-0.3399	0.2817	-0.1382	-0.1764	0.7061	0.6932	-0.1548	-0.6072
BP0054	glutamate/aspartate transport ATP-binding protein (pseudogene)	-0.0117	-0.1664	-0.4092	-0.1811	-0.039	-0.4799	-0.2734	0.705	-0.4316	-0.5484	0.0052	0.1782	-0.0475	-0.0639	0.0133	-0.0131	-0.0097	-0.3376	-0.2068	-0.5089	-0.4538	0.0687	0.3706	0.214	-0.1574	-0.3249	-0.1451	0.0837	-0.3356	-0.373	-0.0607	0.2834	-0.1025	-0.108	-0.2926	-0.0484	-0.1717	0.0719	-0.4464	0.0203	-0.2038	-0.1413	-0.4538	0.0797	0.312	0.149	-0.3392	0.03
BP0055	glutamate/aspartate transport system permease protein	0.2703	-0.7705	-0.4781	-0.6314	-0.1058	-0.6224	-0.7913	-0.4077	-0.4765	-0.0492	0.1162	0.3763	-0.2842	0.0139	0.5929	0.0904	-0.1027	-0.4944	-0.4384	-0.5329	-0.3635	-0.476	-0.6001	-0.2494	-0.5247	-0.6551	-0.5643	-0.8792	0.3166	-0.8246	-0.4519	0.0326	-0.2775	-0.148	-0.0479	-0.2053	-0.5172	-0.4952	-0.5675	-0.6009	-1.2038	0.3076	-0.3252	-0.6472	0.7987	0.8356	-0.2539	-0.8141
BP0056	glutamate/aspartate transport system permease protein	0.2626	-0.6401	-0.5914	-0.8844	-0.0506	-0.6911	-0.8241	-0.8741	-0.8136	-0.2882	0.1237	0.4099	-0.2191	0.0341	0.5417	0.0723	-0.3847	-0.4901	-0.244	-0.5426	-0.4842	-0.7599	-0.5409	-0.542	-0.5836	-0.9118	-0.8159	-0.8199	0.1778	-1.0114	-0.2417	-0.0325	-0.7412	0.1189	0.4557	-0.348	-0.4766	-0.6516	-0.0674	-0.7105	-1.0127	0.3453	-0.7757	-0.7829	0.7847	0.8839	-0.2918	-0.8667
BP0057	amino-acid ABC transporter binding protein precursor	0.1517	-0.5202	-0.7775	-0.5494	-0.3197	-0.6128	-1.0076	-0.6245	-0.2818	-0.488	-0.0262	0.2346	-0.5351	0.1915	0.2902	-0.2175	-0.1676	-0.6804	-0.4816	-0.5763	-0.4884	-0.6596	-0.2554	0.0117	-0.3846	-0.495	-0.8951	-0.4158	-0.0261	-0.9049	-0.381	0.0043	-0.575	-0.3182	0.1214	-0.4573	-0.2006	-0.4762	-0.7848	-0.3942	-0.6607	0.2271	-0.5984	-0.2906	0.681	0.1861	-0.6926	-0.4864
BP0059	regulatory protein (Pseudogene)	0.2172	-0.737	-1.0934	-0.2522	-0.2991	-0.7641	-0.769	-0.3234	-0.7527	-0.5271	0.2252	0.2787	-0.115	-0.0021	0.4912	0.3087	0.2786	-0.7839	-0.5834	-0.7805	-0.3686	-0.5918	0.0733	0.2274	-0.5589	-0.8	-0.5493	-0.4131	0.1446	-0.6636	-0.1808	0.1183	-0.3365	-0.455	0.0023	-0.4007	-0.5327	-0.5642	-0.6971	-0.2638	-0.5776	0.2693	-0.6186	-0.4047	0.7483	0.4118	-0.7745	-0.2927
BP0060	conserved hypothetical protein	0.3228	0.0889	0.186	-0.2279	0.0601	-0.2297	-0.3754	-0.2143	-0.3576	-0.2238	0.2359	0.2138	0.2784	0.0484	0.1406	0.4939	0.0558	-0.0487	-0.2092	0.0309	-0.2922	-0.1827	0.0426	0.5637	-0.0384	-0.1062	0.0472	0.0737	-0.1534	-0.2744	0.0898	0.2216	-0.0645	0.1397	0.2143	-0.1692	-0.0024	0.0714	-0.1255	0.0898	-0.1247	0.077	-0.1517	-0.1227	0.5166	0.5195	-0.0685	0.2256
BP0061	putative DNA-binding protein	0.237	0.0868	0.2156	-0.2983	0.2722	-0.118	-0.18	-0.1295	-0.0506	-0.1642	0.1677	0.1106	0.3405	0.0591	0.0938	0.2061	-0.0513	0.3358	0.0889	0.5744	-0.02	0.1587	0.3087	0.3222	-0.005	-0.0044	0.2264	0.0193	0.0068	-0.124	0.1724	-0.205	0.2251	0.5392	0.348	-0.0102	0.2486	0.3144	0.1356	0.1035	0.3507	0.0637	0.3038	-0.1951	0.1003	0.259	0.168	0.1256
BP0062	hypothetical protein	-0.054	0.1318	0.0669	-0.1541	0.3019	0.0579	-0.0632	-0.2123	-0.2964	-0.4248	0.4472	0.2426	0.2139	0.0213	0.3762	0.4369	0.2017	-0.1123	-0.0758	0.2507	-0.323	0.1397	0.1977	0.4178	-0.1804	-0.4469	-0.3445	-0.0047	0.2192	-0.0322	0.1563	0.219	-0.0993	0.2642	0.0174	-0.2908	0.0361	0.1527	-0.0573	0.0514	0.1204	-0.1483	-0.2265	0.0119	0.2588	0.1509	-0.3785	0.2661
BP0063	conserved hypothetical protein	-0.0792	0.3769	-0.4796	0.4055	0.2213	0.1169	-0.0103	0.5069	0.0979	-0.4538	0.2751	0.2432	0.1962	-0.0253	0.1212	0.294	0.2983	-0.2564	-0.0794	0.7362	-0.2211	0.4796	0.904	0.7184	-0.263	-0.1846	-0.1327	0.7794	-0.2646	-0.2784	0.3437	0.7036	0.2144	0.5267	0.0632	-0.1274	0.2789	0.3788	0.0125	0.4557	0.3877	-0.0949	-0.0312	0.3437	0.6399	0.4544	-0.1641	0.68
BP0063A	putative transposase (partial)	0.3019	-0.6713	-0.6642	-1.352	0.2502	-0.2857	-0.0636	-0.7967	-0.5859	0.1311	0.6021	0.5023	-0.0947	0.0357	0.8373	0.6554	0.3556	-0.7692	-0.3034	-0.181	-0.3668	-0.4796	-0.3039	-0.0417	-0.5113	-0.7327	-0.4463	-0.8555	0.6068	-0.54	-0.013	0.1264	-0.2944	0.2221	0.2359	-0.464	-0.535	-0.6217	-0.4706	-0.8553	-0.7227	0.5555	-0.7019	-1.0041	0.9361	0.9343	-0.0144	-0.6843
BP0064	conserved hypothetical protein	0.1127	0.165	0.2822	-0.0136	0.3785	0.2827	0.4349	0.403	0.0148	-0.4726	0.5336	0.1541	0.396	-0.0876	0.316	0.2412	0.1147	-0.1498	-0.0586	0.6711	-0.3113	0.1865	0.4109	0.3191	-0.2559	-0.3071	0.0632	0.3469	-0.4269	-0.1815	0.0509	0.1144	0.1682	0.6668	-0.0088	-0.0456	0.2907	0.4577	0.3615	0.4777	0.453	-0.1511	-0.1614	0.3758	0.2062	0.6602	-0.1827	0.5592
BP0065	putative ferredoxin	0.0452	-0.1232	-0.678	-0.0998	-0.0682	-0.1422	-0.2038	0.2516	-0.398	-0.5785	0.2178	-0.1123	0.2254	-0.2677	0.3734	0.5106	0.0812	-0.3472	-0.3632	0.1156	-0.5474	0.087	0.3288	0.1986	-0.4404	-0.4876	-0.6052	0.1273	-0.5274	-0.5548	-0.0212	-0.1111	-0.0302	0.0604	-0.2442	-0.219	0.0673	-0.0092	-0.1944	0.0744	0.3998	-0.342	-0.2464	-0.1499	0.2024	0.1812	-0.4028	0.1202
BP0066	oxidoreductase	-0.0206	0.2725	0.1254	0.0001	0.2147	0.1566	0.1274	0.3333	0.045	-0.3131	0.5184	0.0261	0.4901	0.0145	0.2853	0.2899	0.069	0.1836	0.0646	1.0237	-0.2704	0.0366	0.4631	0.3192	-0.2024	-0.1767	-0.0053	0.2248	-0.2304	-0.0125	0.2277	0.1327	0.346	0.673	-0.0391	0.0486	0.1839	0.3021	-0.1276	0.2757	0.2637	-0.023	-0.0907	0.2274	0.3159	0.3318	-0.1567	0.3886
BP0067	integral membrane protein	-0.0329	-0.05	-0.6097	0.398	0.3944	0.0473	0.2633	0.666	0.2933	-0.2931	0.1527	-0.0912	0.26	0.209	0.3394	0.1744	0.2162	-0.2114	-0.1194	0.793	-0.2026	0.3477	0.7557	0.4096	-0.297	-0.4043	-0.3197	0.7332	-0.1695	-0.28	0.1412	0.1364	0.2542	0.6007	0.0179	-0.0977	0.0453	0.1349	-0.018	0.7288	0.5771	-0.0529	-0.0019	0.1951	0.3609	0.3455	0.0546	0.6735
BP0068	putative membrane protein (pseudogene)	-0.1907	0.0259	-0.3277	0.073	-0.0311	0.0376	0.0009	0.5606	-0.0469	-0.2745	0.2331	-0.1129	0.2597	-0.0432	0.2095	0.0646	-0.0312	-0.1321	-0.135	0.4777	-0.3314	0.2184	0.2518	0.414	-0.307	-0.4272	-0.2912	0.3959	-0.4255	-0.1627	0.0956	0.253	0.2437	0.3649	-0.1147	-0.088	-0.0427	0.1099	-0.035	0.458	0.3565	-0.284	-0.0936	0.0299	0.3434	0.2901	-0.1253	0.5564
BP0069	putative exported protein	0.0668	-0.0584	-0.4389	-0.0354	-0.0895	-0.2574	-0.4749	0.2388	-0.2815	-0.5095	0.0046	-0.0039	-0.0068	-0.0522	0.1128	-0.002	-0.0414	-0.2177	-0.0126	0.2349	-0.3762	0.0317	0.0594	0.2186	-0.4095	-0.4558	-0.2613	0.2282	-0.23	-0.3104	-0.0627	0.6257	0.2311	0.2184	0.0182	-0.1225	-0.0697	-0.0546	-0.1742	0.2062	0.2829	-0.0556	-0.3219	0.1047	0.4045	0.3368	-0.1903	0.2706
BP0070	putative hydroxylase beta subunit (Pseudogene)	-0.1836	0.2393	-0.3032	-0.0985	-0.1036	0.1124	-0.1984	0.2464	-0.2798	-0.0824	0.1041	-0.2572	0.3338	-0.0937	-0.0428	-0.3492	-0.0828	-0.3007	-0.388	0.3913	-0.3183	0.3571	0.5069	0.3104	-0.3951	-0.5031	-0.1159	0.2317	-0.3979	-0.2408	-0.0217	0.4968	-0.0044	0.2443	-0.1878	-0.4514	0.0889	0.204	-0.007	0.3187	0.4397	-0.4224	-0.1973	0.318	0.517	0.6338	0.0786	0.3831
BP0072	transposase	-0.0724	0.22	0.2988	-0.2529	0.0403	0.0532	0.0292	-0.402	-0.4182	-0.2054	0.3245	0.0529	0.0847	0.0733	0.0409	0.2258	-0.1332	-0.0146	-0.4427	-0.6639	-0.4146	-0.0564	0.0466	0.229	-0.2385	-0.2861	-0.1548	-0.1068	-0.1674	-0.3188	0.0687	0.6744	-0.2204	-0.4439	0.0368	-0.4877	0.1982	0.0972	0.0102	-0.2021	0.0965	0.0412	-0.1497	0.377	0.9389	1.1617	-0.2361	-0.0266
BP0073	transposase (pseudogene)	-0.0194	0.2396	0.0241	0.2836	0.0354	-0.5078	-0.4036	0.4146	0.2685	-0.1538	0.2785	0.1256	0.2644	0.1729	-0.3057	-0.1602	-0.1157	0.3292	0.1669	0.4356	0.149	0.324	0.1207	0.514	0.1477	0.3413	0.3019	0.6954	0.0145	0.2524	0.3331	1.1948	0.5494	0.199	0.1795	0.0992	0.2222	0.2345	0.2391	0.6286	0.4286	0.0473	0.1603	0.5278	0.7627	0.7217	0.4481	0.5469
BP0074	heat shock protein	-0.4103	-0.3624	-0.4779	-0.4441	-0.2696	0.1571	-0.2465	0.8432	0.7849	-0.8131	-0.458	-0.5061	-0.1222	0.2944	-0.8158	-0.3229	-0.2619	0.1026	-0.2949	-0.1483	-0.5583	0.0554	0.3233	0.4938	-0.2739	-0.06	-0.0426	0.1638	-0.5755	-0.4195	-0.3253	-0.0479	0.0601	0.3369	-0.081	0.0855	-0.2938	0.1809	-0.1329	0.3105	0.5439	-0.2784	0.4689	-0.4428	0.3395	-0.0482	-0.0902	0.5067
BP0075	probable glutathione S-transferase	-0.0537	-0.1462	0.0055	-0.1477	-0.0604	-0.1592	-0.4224	-0.0274	-0.0095	-0.5025	-0.0695	0.3391	0.1728	0.3632	0.0986	-0.0471	0.1323	0.1491	0.0159	-0.7097	0.059	-0.1646	-0.3777	0.5231	0.2611	0.0787	-0.0341	0.2146	0.3718	-0.5172	-0.1801	0.2841	-0.1512	-0.354	0.3983	-0.1431	0.0763	0.1462	0.1691	0.3386	0.0373	0.4283	0.261	-0.0977	0.479	0.5889	-0.1259	0.3538
BP0076	N-acetylmuramoyl-L-alanine amidase	-0.0138	-0.1373	-0.0322	0.1248	-0.0822	-0.3578	-0.7079	0.1203	-0.0288	-0.2133	0.2682	0.3871	0.1414	0.3122	0.3133	0.6351	0.2942	0.3324	0.2039	-0.4748	-0.0576	-0.3262	-0.1194	0.3571	-0.0211	-0.2038	0.1996	0.3042	0.1398	-0.0768	-0.1263	0.0989	0.2207	-0.0721	0.3333	0.17	-0.1611	0.0028	0.1829	0.3979	-0.1429	0.3474	0.1269	-0.0186	0.5079	0.0202	0.023	0.5415
BP0077	putative exported protein	0.272	-0.2563	-0.1811	-0.034	0.1827	0.0241	0.016	0.47	0.3972	-0.1464	0.3065	0.3808	-0.0452	0.1602	0.4033	0.3872	0.4878	0.1322	0.3248	0.5985	0.1131	0.0657	0.5428	0.5112	0.0804	0.2207	0.269	0.2979	0.2417	0.1006	0.354	0.7283	0.3152	0.397	0.3761	0.1827	0.1065	0.1786	0.0921	0.424	0.0268	0.2776	0.3019	0.3169	0.7244	0.4532	0.0492	0.3381
BP0078	putative membrane protein	0.2069	-0.2531	-0.2151	-0.284	0.0434	-0.2365	-0.0765	0.0181	0.1753	-0.2321	0.048	0.404	-0.0173	0.2524	0.5187	-0.2152	0.1423	-0.0274	0.0693	0.1755	-0.0763	-0.2603	0.1755	0.1436	-0.0004	-0.1342	-0.008	-0.2278	0.3354	-0.1922	0.1182	0.6528	0.0866	0.3663	0.3593	0.0541	-0.0297	-0.0415	-0.2276	0.0165	-0.2285	0.3603	0.1619	0.058	0.6699	0.6716	-0.1167	-0.3136
BP0079	signal recognition particle protein	-0.0338	0.2617	0.4136	-0.3308	0.0406	0.195	-0.0259	-0.3274	-0.043	0.2284	0.0951	0.1474	0.1792	0.1703	-0.0898	-0.1232	-0.3614	0.3436	0.0553	-0.3375	-0.1187	-0.3124	-0.3495	0.112	-0.0151	-0.2253	0.016	-0.2483	0.4641	0.4916	0.3015	0.4849	0.2363	0.0133	0.2289	-0.0842	0.0772	0.1388	0.0536	-0.2118	-0.0187	0.2947	-0.0669	0.1511	0.6652	0.8732	0.2202	-0.0387
BP0081	transposase for IS1002 (pseudogene)	0.848	-0.6484	-1.6577	-0.4437	-0.0368	-1.0715	-1.479	-0.8387	-1.1687	-0.4173	0.2181	0.671	-0.4131	0.2853	0.6171	-0.1334	0.7383	-1.2331	-0.5542	-1.2203	-0.384	-1.0853	0.131	0.7445	-0.9782	-1.0549	-1.6145	-1.257	0.061	-1.0546	-0.0779	0.8708	-0.6714	-0.7255	0.4441	-0.2685	-0.4963	-0.8929	-1.3985	-0.841	-1.2389	0.2137	-0.9243	-0.8011	0.8621	0.3112	-1.2803	-1.001
BP0082	lipopolysaccharide biosynthesis protein	0.4066	-0.0555	-0.4701	0.2811	-0.0627	-0.4235	-0.5197	0.2312	-0.1837	-0.5937	0.1335	0.2698	0.1466	0.2002	0.2592	0.5815	0.5423	0.0643	0.0781	-0.3789	-0.0012	0.3732	0.3964	0.734	0.1573	-0.0215	0.1598	0.4673	0.2413	-0.1892	0.3274	0.4722	0.1493	-0.2876	0.2704	0.1022	0.0728	0.1728	-0.1839	0.5985	0.2043	0.2991	0.0503	0.0847	0.5661	0.2114	-0.2413	0.4013
BP0083	putative integral membrane protein (Pseudogene)	0.6394	0.3952	0.0099	0.0017	0.2378	-0.3228	-0.4602	0.1525	0.0028	-0.0289	0.5457	0.4698	0.4628	0.2613	0.6033	-0.1307	0.4353	0.1677	0.4102	0.4075	0.1707	0.0831	0.2662	0.5476	0.1626	0.2661	0.5193	0.4254	0.1357	0.192	0.4102	0.3981	0.4115	0.4371	0.3969	0.3414	0.3158	0.2455	0.2671	0.4131	0.0878	0.2739	0.2154	0.3039	0.6948	0.3885	0.2215	0.4349
BP0085	lipopolysaccharide biosynthesis protein	0.0679	-0.0326	-0.8948	0.2918	-0.0856	-0.5091	-0.6515	0.5255	-0.1126	-0.4456	0.0408	0.0307	-0.2549	0.0887	0.1118	0.0614	0.4485	-0.0378	-0.1002	0.0427	-0.0746	0.2553	0.5567	0.5654	0.017	-0.2825	-0.0666	0.6478	-0.0248	-0.2282	0.2345	0.1788	-0.0108	0.0024	-0.1499	-0.1451	-0.0743	-0.047	-0.1191	0.6084	0.1177	-0.0892	-0.0437	0.106	0.1081	-0.3118	-0.0725	0.6744
BP0086	putative glycosyl transferase	-0.2006	-0.022	-0.3798	0.3497	0.0747	-0.5949	-0.661	0.4081	-0.1101	-0.1657	0.1455	0.1029	0.2488	0.1682	0.0579	-0.2378	0.3442	0.0236	-0.0821	-0.158	-0.166	0.0704	0.4996	0.6158	0.068	0.0388	0.1712	0.5821	0.0818	0.0479	0.2209	0.193	0.0483	-0.1067	0.1778	-0.1515	0.0263	0.1244	-0.094	0.5721	0.0429	-0.0317	0.0199	0.0873	0.1427	0.0308	0.0521	0.6193
BP0087	probable sugar transferase	-0.0403	0.1179	-0.5989	0.3572	0.0762	-0.2927	-0.2947	0.5111	-0.3497	-0.6109	0.0856	-0.0139	0.1702	0.1703	0.2199	-0.0847	0.599	-0.1572	0.0299	-0.2701	-0.1193	0.4286	0.6109	0.7712	-0.1049	-0.1895	0.1188	0.7961	-0.2674	-0.2396	0.287	0.3677	0.2468	-0.1675	-0.1456	0.0758	0.1652	0.2595	0.0042	0.816	0.509	0.005	-0.0305	0.1604	0.2554	-0.1937	-0.2206	0.7936
BP0088	lipopolysaccharide biosynthesis protein	-0.0292	-0.2512	-0.604	0.3453	-0.122	-0.3314	-0.3713	0.5488	0.0516	-0.6504	0.0797	0.0127	-0.1324	0.1201	0.2098	0.0454	0.5161	-0.2045	-0.0493	-0.3429	-0.0823	0.0056	0.4029	0.5619	-0.0873	-0.0459	-0.0823	0.5509	-0.0025	-0.2268	0.0534	0.282	0.1558	-0.072	0.0613	0.1409	-0.17	-0.0579	-0.0334	0.7862	0.1216	0.3314	0.1919	0.1026	0.5098	0.1453	0.0009	0.7017
BP0089	probable glycosyl transferase	0.0931	0.1037	0.0236	-0.0657	0.0448	-0.2728	-0.1277	-0.0204	-0.1126	-0.0259	-0.0595	-0.0453	0.135	0.1858	0.1296	-0.2965	0.0561	0.0966	-0.0204	-0.1585	0.0719	-0.2116	0.2054	0.4501	0.0276	-0.221	0.1255	0.2083	-0.326	-0.4077	0.1077	0.0929	0.1068	-0.0372	0.1876	-0.0842	-0.0299	0.2643	0.091	0.3024	-0.079	0.1721	0.2127	0.0911	0.2957	0.1607	0.3098	0.2262
BP0090	UDP-N-acetylglucosamine 2-epimerase	-0.1088	0.002	-0.0616	-0.0496	-0.1018	-0.5522	-0.7572	-0.0319	-0.1292	-0.4026	-0.3379	0.2264	0.1379	0.2682	-0.0101	-0.1021	0.1204	0.2245	0.2456	-0.5781	0.1023	-0.2156	-0.0665	0.5478	0.1104	0.0162	0.3407	0.3825	0.0717	-0.0928	-0.4995	0.4374	0.2413	-0.216	0.3303	0.1194	0.1201	0.1932	0.0705	0.4803	0.355	0.193	0.3139	0.2032	0.5803	0.2943	-0.438	0.4606
BP0091	lipopolysaccharide biosynthesis protein	-0.1152	-0.2785	-0.4626	-0.1878	-0.0726	-0.4101	-0.3886	0.1779	-0.1282	-0.5396	-0.0915	-0.1237	0.0356	0.0485	0.0906	0.0939	0.1536	-0.0581	-0.0758	-0.2969	-0.0999	0.0439	0.3319	0.36	-0.1436	-0.0199	0.0182	0.335	-0.3356	-0.2599	0.0181	0.1583	0.1478	-0.138	0.0159	0.0228	-0.0241	0.1061	-0.078	0.36	0.1876	-0.0106	0.0984	0.1145	0.3039	0.0034	-0.1568	0.3498
BP0092	probable acetyltransferase	-0.4451	-0.0766	-0.0044	-0.072	-0.1568	-0.1767	-0.1862	0.0268	-0.1858	-0.1678	0.1861	0.0091	0.2153	0.1815	0.0167	-0.225	0.0562	0.0369	0.0714	-0.1156	-0.1223	-0.2111	-0.1368	0.5083	-0.1335	-0.24	0.0284	0.2408	-0.1338	0.0013	0.1083	0.2273	0.1767	0.0726	0.0684	0.0104	-0.0151	0.0546	0.0264	0.3112	-0.1237	0.0517	-0.0625	-0.0236	0.329	0.2579	-0.0925	0.2943
BP0093	probable oxidoreductase	-0.0683	-0.0496	-0.1295	0.0309	-0.1531	-0.5448	-0.4141	0.0375	-0.0271	-0.5607	0.0559	0.0759	0.1222	0.118	0.0488	0.3588	0.0721	-0.1173	0.0687	-0.4768	-0.1594	-0.1471	-0.0878	0.4655	-0.1861	-0.1848	-0.0398	0.2063	-0.1281	-0.1427	0.0429	-0.0083	0.0856	-0.2439	0.0862	0.0141	0.061	0.0888	0.2112	0.4112	-0.0519	0.0555	-0.0788	-0.0989	0.2951	0.0113	-0.1848	0.3658
BP0094	probable heptosyltransferase	0.1567	0.3354	0.3075	-0.1812	0.2629	-0.0378	-0.0555	-0.1914	-0.1264	0.1585	0.3228	0.1176	0.0167	0.1312	0.2989	0.3178	-0.0955	0.4369	0.1127	0.4607	0.0878	0.084	-0.0412	0.2077	0.2109	-0.1644	0.08	0.1138	-0.148	-0.1459	-0.0223	-0.2328	0.2242	0.6317	0.2788	-0.0102	0.4758	0.2597	0.2919	0.3002	0.152	0.1648	0.4157	0.1576	0.157	0.1897	0.6166	0.0882
BP0095	3-deoxy-D-manno-octulosonic-acid transferase	0.083	-0.1566	0.325	-0.2044	0.214	-0.4963	-0.6287	-0.3404	-0.0527	0.1422	0.0832	0.2801	0.1722	0.3346	-0.0357	-0.1627	-0.0134	0.4776	0.0525	0.0806	0.2247	0.1392	0.3325	0.3446	0.2639	0.3583	0.2578	0.1546	0.1067	-0.1174	0.2333	0.4552	0.2801	0.315	0.5377	0.0028	0.2008	0.2546	0.0251	0.1092	-0.0171	0.4321	0.5223	0.156	0.4125	0.7112	0.397	-0.0386
BP0096	putative exported protein	-0.1117	-0.1161	0.2135	-0.2701	-0.1154	-0.3946	-0.4999	-0.3985	-0.3761	-0.448	-0.0084	0.0455	-0.0801	0.1367	0.0949	0.0938	0.0147	0.2043	-0.0143	-0.4509	-0.0502	-0.3105	-0.1494	0.3064	0.2746	0.1631	0.3618	0.0562	0.2719	-0.1612	-0.027	0.4742	-0.077	-0.0905	0.3163	-0.1242	0.1031	-0.0299	0.2877	0.0011	-0.421	0.2463	0.067	0.1255	0.7001	0.7541	-0.0528	0.0191
BP0097	Bvg accessory factor	-0.0726	-0.2856	-0.2808	-0.065	0.0893	-0.3991	-0.6187	0.0685	-0.0397	-0.5195	0.098	0.2454	-0.207	0.3608	0.4644	0.5854	0.3474	0.159	0.0456	-0.2614	0.0344	0.1929	0.3345	0.4942	0.3099	0.3162	0.3258	0.3744	0.5147	-0.2482	0.1069	0.4156	0.0726	-0.0829	0.4689	-0.0371	0.0425	0.0504	-0.0166	0.4164	0.1065	0.427	0.3511	0.0528	0.5542	0.5326	-0.036	0.4268
BP0098	putative biotin protein ligase	0.0033	-0.1407	-0.3455	0.4161	0.0696	-0.2082	-0.4022	0.6766	0.3113	-0.4435	0.1647	0.288	0.1407	0.3791	0.3102	0.2103	0.8209	0.1803	0.3875	0.3319	0.1613	0.3743	0.7772	0.9959	0.2589	0.3824	0.4443	1.0225	0.2603	-0.0106	0.4627	0.2541	0.2984	0.3518	0.5369	0.3174	0.368	0.2792	0.3273	1.0484	0.5405	0.3271	0.2328	0.1773	0.3104	0.0335	0.1786	0.9121
BP0099	putative integral membrane protein	0.4271	0.3992	0.6324	0.1705	0.4756	-0.0044	-0.2748	-0.2438	-0.0106	-0.003	0.4985	0.5072	0.2227	0.3537	0.2728	0.3957	0.1206	0.4029	-0.0255	0.018	0.1828	-0.0071	0.1006	0.3767	0.3543	0.2234	0.3064	0.068	0.1	-0.3902	-0.0601	0.6097	0.1684	0.2843	0.5283	0.0804	0.2234	0.1401	0.1874	0.2013	0.237	0.4019	0.4374	0.3182	0.6097	1.0914	0.2409	0.1133
BP0100	probable ATP-binding component of ABC transporter	0.1183	0.2198	0.1738	0.0693	0.4221	-0.3245	-0.2791	-0.2047	-0.3506	-0.3697	0.4801	0.3018	0.1691	0.223	0.2727	0.0839	0.1148	0.018	-0.163	0.4048	-0.0777	0.1065	0.2958	0.3427	0.1017	0.2077	0.095	0.0355	-0.3173	-0.6508	-0.1712	0.4466	0.1119	0.3349	0.2757	-0.1679	0.0957	0.1104	-0.1508	0.1468	0.1201	0.2652	0.0636	0.2265	0.4411	0.6444	-0.2806	0.163
BP0101	putative exported protein (Pseudogene)	0.1026	-0.0671	0.177	-0.001	0.2079	-0.4703	-0.6107	-0.1562	-0.1891	-0.2945	0.2924	0.2879	-0.1593	0.1227	0.0185	0.4947	0.0851	0.0766	-0.2416	-0.0604	-0.0409	-0.152	-0.1357	0.3336	-0.0615	-0.0855	-0.0285	0.2062	-0.1679	-0.5547	-0.2646	0.3921	-0.1567	0.1047	0.2922	-0.1984	-0.1789	-0.0561	-0.0872	0.106	-0.1567	0.1721	0.0057	-0.0316	0.6146	0.5768	-0.0417	0.0663
BP0101A	putative exported protein	0.1756	0.2349	0.759	0.2114	-0.0498	-0.3578	-0.3538	-0.0434	0.0551	-0.2283	0.2791	0.4663	0.1207	0.4307	0.2169	0.4761	0.283	0.4162	0.1567	0.279	0.3444	0.1748	0.3216	0.5385	0.3932	0.504	0.1199	0.3595	0.1668	-0.2919	-0.0482	0.914	0.3553	0.441	0.478	0.155	0.1093	0.1435	0.0545	0.2999	0.2129	0.653	0.6745	0.1772	0.7998	0.8844	0.0215	0.3092
BP0101B	conserved hypothetical protein	0.2225	-0.2141	0.4218	-0.0069	0.1406	-0.3128	-0.4088	0.0326	0.0427	-0.3573	0.2145	0.351	0.1152	0.2249	-0.008	-0.2735	0.0624	0.3311	0.2101	0.3251	0.1	-0.147	-0.0086	0.1395	0.0868	0.2999	0.0788	-0.0377	-0.0039	-0.3567	0.1267	0.614	0.131	0.4092	0.2604	0.1974	-0.1586	0.2008	0.0466	0.2718	0.0082	0.3771	0.3492	0.2251	0.7604	0.6326	-0.2327	0.4305
BP0102	putative penicillin-binding protein precursor	0.0896	0.2672	-0.2963	0.2605	0.0874	-0.1959	-0.0205	0.5607	-0.21	-0.3885	0.1172	-0.0512	0.5643	0.3343	0.1717	0.1508	0.3222	0.1497	-0.0726	-0.381	-0.1254	0.2466	0.4436	0.586	0.1982	0.0552	0.3989	0.5662	0.2901	0.0381	0.5697	0.2414	0.2103	-0.3702	0.0204	0.1084	0.439	0.429	0.1826	0.5625	0.2717	0.3306	0.0973	0.4064	0.4768	0.1357	0.2265	0.4638
BP0103	probable class IV aminotransferase	-0.0257	-0.0044	0.3685	-0.0668	0.3104	0.0501	-0.0728	0.0129	0.1576	0.111	0.3205	0.2768	0.48	0.2824	0.0218	-0.5205	-0.0057	0.5506	0.3818	0.2291	0.085	0.1078	0.0806	0.3707	0.144	0.0745	0.4361	0.192	0.4998	0.2436	0.1147	0.5383	0.3272	0.3045	0.2571	0.0999	0.4102	0.5534	0.2933	0.3016	0.0467	0.5764	0.1818	0.463	0.6538	0.9323	0.1555	0.4539
BP0104	conserved hypothetical protein	0.1216	0.1215	0.1385	-0.3061	0.1006	-0.2944	-0.2961	-0.4398	-0.3662	0.1995	0.0412	0.1994	0.362	0.3347	0.061	0.2495	-0.2899	0.2143	-0.09	-0.7016	-0.0333	-0.3072	-0.2749	0.1493	0.0859	0.1076	0.1591	-0.0647	0.3458	-0.1067	0.1452	0.4645	-0.0074	-0.4659	0.2381	-0.2152	0.2334	0.1553	-0.0072	-0.0975	-0.1358	0.4283	0.0896	0.2026	0.5054	0.5811	0.1732	-0.089
BP0105	lipoate-protein ligase B	0.2673	0.1207	0.1686	0.0113	0.0035	-0.4201	-0.684	-0.0626	-0.1501	-0.371	0.2259	0.2932	0.2472	0.2116	0.1946	-0.2666	0.2154	0.1541	0.1376	-0.0946	0.0136	0.0034	0.1779	0.4631	0.0337	0.1453	0.3063	0.2271	0.2928	-0.202	0.399	0.2528	0.1571	0.0868	0.2808	0.0341	0.0673	0.1171	-0.0624	0.2599	-0.0038	0.2411	0.2037	0.1512	0.4471	0.5733	-0.0144	0.2691
BP0106	lipoic acid synthetase	-0.0022	0.0819	0.0346	-0.0263	-0.0353	-0.4539	-0.4198	-0.3012	-0.3285	-0.1318	0.06	0.1146	0.1355	0.2019	0.0299	-0.2113	0.0442	0.1037	0.1147	-0.3572	-0.1718	0.0018	0.1281	0.1825	-0.0965	0.0055	0.1962	0.2339	-0.0771	0.015	-0.1869	0.5005	0.2188	-0.1962	0.0747	0.1189	0.0234	0.1873	0.1183	0.26	0.0524	0.1926	-0.0347	0.156	0.565	0.4651	0.0772	0.3005
BP0107	dTDP-4-dehydrorhamnose 3,5-epimerase	0.0207	-0.017	-0.3146	-0.094	-0.2017	-0.3799	-0.7197	0.0344	-0.2894	-0.3635	-0.0967	0.0856	-0.0463	0.1698	-0.1013	-0.5403	-0.0636	-0.2122	-0.103	-0.4466	-0.0283	-0.1967	-0.0435	0.1932	0.0836	-0.1217	-0.0417	0.0879	0.2848	-0.1357	0.1962	0.7476	0.2399	-0.0677	0.0427	-0.0236	-0.0668	-0.0785	-0.4051	0.0393	-0.2867	0.1881	0.0966	0.0489	0.747	0.4101	0.002	0.1449
BP0108	dTDP-4-dehydrorhamnose reductase	0.1341	0.28	0.3449	0.1149	0.0592	-0.3794	-0.3123	0.0597	-0.1407	-0.0487	0.1644	0.1461	0.297	0.3368	0.0856	-0.5061	0.0848	0.358	0.0477	-0.8122	0.0838	-0.037	0.0314	0.3695	0.2979	-0.0289	0.1754	0.2321	0.5763	0.1648	0.3535	0.8619	0.1821	-0.4743	0.2693	-0.0936	0.2889	0.3362	0.1288	0.1792	-0.0321	0.4492	0.102	0.656	0.7145	0.7567	0.1781	0.3457
BP0109	dTDP-glucose 4,6-dehydratase	0.2951	-0.0551	-0.6458	0.3045	-0.0421	-0.6362	-0.8543	0.1098	-0.2084	-0.6169	-0.1005	0.2195	0.0276	0.303	0.135	-0.2098	0.4389	-0.1189	-0.0782	-1.1798	-0.1335	-0.3033	0.2871	0.5986	0.0406	-0.2288	0.1572	0.2894	0.5411	-0.3207	0.3786	0.6038	-0.2197	-0.7959	0.0847	-0.1561	-0.0985	-0.2404	-0.3098	0.4955	-0.1774	0.3466	-0.0061	0.1428	0.7236	0.2919	-0.1122	0.3352
BP0110	transposase	0.3496	-0.6885	-1.1638	-0.9159	-0.1009	-0.741	-0.9161	-0.9175	-1.0312	-0.5868	0.0635	0.7489	-0.4338	-0.0025	0.6667	0.4048	0.2966	-0.8544	-0.6585	-1.0879	-0.5078	-0.8373	-0.0465	0.2542	-0.8182	-0.9192	-1.366	-1.1432	0.5344	-0.6546	-0.1403	0.5931	-0.5381	-0.4311	0.3956	-0.3608	-0.4629	-0.7732	-1.1063	-0.8954	-1.0436	0.4927	-0.9119	-0.5734	1.1328	0.4667	-1.2313	-1.0498
BP0111	putative membrane protein (pseudogene)	0.0847	-0.0131	-0.0256	0.0418	0.1422	-0.2446	-0.3132	-0.0054	-0.2325	-0.3873	0.1321	0.2195	0.1166	0.1771	0.2364	0.2187	0.1504	-0.0255	-0.1172	0.3534	-0.1244	0.0183	0.1656	0.2971	-0.0848	0.0926	-0.051	0.0994	-0.1546	-0.0811	0.1864	0.5245	0.0996	0.2954	0.29	-0.0489	0.0383	-0.0062	0.1413	0.2851	0.0295	0.1169	-0.0688	0.4162	0.6536	0.651	-0.0918	0.2692
BP0112	cystathionine beta-lyase	-0.0508	0.1357	0.2342	0.0452	0.1809	0.01	0.4817	0.2071	0.1334	-0.1227	0.5154	0.2969	0.3465	0.1226	0.0167	-0.0711	0.0554	0.259	0.2231	0.0842	-0.0604	0.059	0.6287	0.4362	0.464	0.7039	0.4359	0.4992	-0.5285	-0.6076	-0.4402	-0.2673	0.6004	0.3871	0.2958	0.1604	0.2987	0.5473	0.3727	0.4599	0.2727	0.363	0.2524	-0.0485	0.1642	0.1839	0.1254	0.4558
BP0113	thiol:disulfide interchange protein DsbA precursor	0.2112	0.0187	-0.1085	0.6337	0.1486	-0.7522	-0.6463	0.0773	-0.2457	-0.3217	0.2444	0.4192	0.6362	0.5132	0.3019	-0.0865	0.8815	0.5321	0.6084	-0.4148	0.2498	-0.1228	0.5421	0.9663	0.3841	0.1703	0.8709	1.1721	-0.3852	-1.0149	-0.6908	0.7454	0.6285	-0.2791	0.6664	0.6341	0.2859	0.5963	0.5087	1.2591	0.1143	0.3905	0.4612	0.7522	0.72	0.3229	0.4436	1.2046
BP0114	putative exported protein	0.1425	-0.0648	-0.2199	0.0166	-0.0723	-0.2405	-0.1874	0.1244	0.1328	-0.3598	0.1409	0.184	0.3172	0.148	-0.025	-0.2392	0.1271	-0.0531	0.0294	-0.386	-0.0699	-0.0091	0.309	0.3837	0.0146	0.0073	0.1064	0.2124	0.3893	0.2358	0.4859	0.209	0.0647	-0.1607	0.1087	-0.0623	0.0475	0.0401	-0.2075	0.2768	-0.0435	-0.1204	-0.2053	0.2017	0.3803	0.2767	-0.1916	0.2298
BP0115	arginyl-tRNA synthetase	0.0836	0.0128	-0.022	-0.031	-0.2494	-0.1544	-0.2653	0.0667	0.0123	-0.1377	0.1106	0.0392	0.2167	0.1255	-0.1715	-0.5451	-0.1245	-0.0529	-0.1931	-0.7268	-0.2328	-0.3298	-0.0508	0.2389	-0.1065	-0.2381	0.0666	0.0645	0.571	0.3667	0.7688	0.4831	0.0285	-0.1618	-0.0166	-0.2319	-0.1248	0.0058	-0.2138	0.0366	-0.2904	-0.0056	-0.1918	0.0512	0.5344	0.4807	-0.1664	0.0562
BP0116	conserved hypothetical protein	-0.1232	-0.1226	-0.0003	-0.3692	-0.4439	-0.4488	-0.1977	-0.1342	-0.1458	-0.4879	-0.223	0.0469	-0.0461	0.0785	-0.2197	-0.3961	-0.4944	-0.0542	-0.3086	-0.9318	-0.1192	-0.5043	-0.7226	-0.2142	-0.389	-0.5386	-0.3551	-0.38	0.316	-0.034	0.1149	1.0201	-0.1624	-0.4668	-0.0409	-0.35	-0.4758	-0.315	-0.4041	-0.2717	-0.3844	0.0419	-0.1554	0.0015	1.1725	1.0087	-0.0123	-0.2655
BP0117	hypothetical protein	0.1316	-0.4208	-0.1827	-0.3159	-0.3895	-0.3787	-0.3377	-0.2008	-0.027	-0.3588	-0.235	0.126	-0.2154	0.2124	-0.2693	0.0462	-0.3249	-0.2636	-0.3383	-0.5604	-0.2408	-0.5864	-0.5628	-0.088	-0.2928	-0.3367	-0.4106	-0.3232	0.2229	-0.2872	0.128	1.1007	-0.2701	-0.3278	-0.0641	-0.3838	-0.2285	-0.2538	-0.5201	-0.1349	-0.6615	-0.0042	-0.0613	-0.024	0.8857	0.7292	-0.2025	-0.264
BP0118	transposase for IS1663	0.0667	0.264	0.5682	-0.3692	0.1091	-0.3124	-0.4405	-0.7689	-0.2012	0.0162	0.0061	0.3328	0.3833	0.0995	0.2093	-0.1342	-0.4245	0.3048	-0.1717	-0.3498	0.1573	-0.2292	-0.1806	-0.3266	-0.0721	-0.1425	0.1202	-0.5328	-0.2201	-1.0315	-0.9347	0.4947	0.208	0.2742	0.4484	-0.0633	-0.0137	0.0547	-0.136	-0.3561	-0.1325	-0.0536	0.318	0.1356	0.8011	1.1199	-0.0183	-0.3448
BP0119	inner membrane component of binding-protein-dependent transport system	0.095	0.295	0.517	-0.0367	-0.0351	-0.1692	-0.3906	-0.0227	-0.1919	-0.1977	0.0314	0.1438	0.0767	0.0816	0.0551	0.2161	-0.1279	0.0217	-0.0881	-0.1228	0.1892	-0.0569	0.106	0.2598	-0.0802	-0.1073	0.1931	0.1842	-0.1711	-0.1207	-0.1888	0.1622	-0.1248	0.054	-0.0039	0.0534	0.1037	-0.0128	0.0387	0.0846	-0.1596	0.1141	0.2032	-0.1567	0.5943	0.6145	0.1249	0.1052
BP0120	inner membrane component of binding-protein-dependent transport system	0.0535	-0.2222	0.0475	0.0737	-0.0252	-0.3255	-0.783	0.0064	0.0159	-0.2343	0.1525	0.4417	-0.057	0.1811	0.1308	-0.2179	-0.0304	-0.1709	-0.0868	-0.2131	0.0742	-0.0371	0.1021	0.1585	-0.1931	-0.3311	-0.296	0.0078	-0.1042	-0.4716	-0.2987	0.1162	-0.0131	0.1987	0.2849	-0.0495	-0.2972	-0.2647	0.104	0.1349	0.0332	0.1728	0.2172	-0.1395	0.4349	0.2568	-0.0046	0.118
BP0121	probable extracellular solute-binding protein	0.0241	-0.1633	-0.2102	0.4057	-0.0617	-0.5029	-0.6464	0.3031	-0.0749	-0.5034	0.1578	-0.0255	0.2608	0.0179	-0.205	-0.3259	0.1504	-0.3061	-0.1249	-0.6812	0.0078	-0.1916	0.2003	0.2996	-0.3796	-0.2973	-0.3011	0.2501	-0.3228	-0.4959	-0.2212	0.1311	-0.0947	-0.4287	-0.022	-0.0073	-0.3657	-0.0665	-0.0913	0.5497	0.1673	0.0656	-0.0769	-0.0476	0.196	-0.0768	-0.2826	0.4631
BP0122	sugar ABC transporter, ATP-binding protein	-0.0874	0.2682	0.2723	-0.0243	-0.0354	-0.3144	-0.2446	0.2724	0.1713	-0.2966	-0.0613	-0.1009	-0.0471	0.177	-0.1843	-0.2609	-0.1461	-0.1361	0.0514	-0.4421	0.2635	0.0501	-0.2104	0.4323	0.1021	-0.2472	0.158	0.3108	-0.2373	-0.1177	-0.2283	0.545	0.0455	-0.0569	0.1074	-0.2466	-0.0403	-0.0243	0.0442	0.4271	0.4325	-0.0077	0.4261	0.1019	0.3502	0.5212	-0.2286	0.369
BP0123	putative cAMP phosphodiesterase	0.203	0.3685	-0.132	0.0271	-0.2232	-0.8254	-0.5849	-0.4089	-0.0768	-0.4883	-0.5737	-0.1983	-0.2716	-0.4805	-0.3475	-0.1217	-0.4598	-0.1362	-0.2131	-0.5506	-0.3107	-0.3754	-1.2245	-0.4495	0.1489	-0.1358	-0.0664	-0.4641	-0.7671	-0.7181	-0.3654	0.1275	0.1379	-0.3717	-0.0691	0.0849	0.1151	0.4069	0.142	-0.031	0.0872	-0.1302	0.269	0.292	0.3311	0.543	0.0349	0.0064
BP0125	probable ABC transporter, ATP-binding protein (Pseudogene)	0.2678	-0.5819	-0.7149	-0.1779	-0.0113	-0.8484	-0.9283	-0.2212	-0.4748	-0.7796	0.0487	0.2858	-0.2032	0.325	0.3706	-0.0387	0.2812	-0.246	-0.2817	-0.8482	-0.1295	-0.5228	-0.1903	0.367	-0.2271	-0.4979	-0.2724	0.1348	0.2059	-0.3851	0.0718	0.3751	0.0202	-0.1745	0.3215	-0.1083	-0.2809	-0.3061	-0.3003	0.1289	-0.4478	0.3446	-0.2338	-0.2491	0.6679	0.4838	-0.0959	0.2539
BP0126	ABC transporter, permease protein	0.0105	-0.7183	-0.8438	-0.3942	-0.0405	-0.7257	-1.1664	-0.2404	-0.7355	-0.8055	0.2446	0.6063	-0.0236	0.1037	0.1117	0.2631	-0.1683	-0.4095	-0.5792	-0.3148	-0.2798	-0.3286	-0.1849	-0.3167	-0.4384	-0.2807	-0.5245	-0.428	0.0458	-0.4639	0.4004	0.3291	0.0129	0.0443	0.3213	-0.1541	-0.4847	-0.6062	-0.4159	-0.2819	-0.3747	0.3391	-0.1861	-0.3329	0.7401	0.4592	-0.4888	0.1105
BP0127	probable Binding-protein-dependent transport system, permease protein (Pseudogene)	0.078	-0.3269	-0.7945	-0.7616	-0.3289	-0.4391	-1.1587	-0.766	-0.9172	-0.1176	0.0696	0.4409	0.0585	0.0747	0.4425	-0.2265	0.0282	-0.9761	-0.6101	-0.0637	-0.1027	-0.4179	0.1368	0.0559	-0.4686	-0.5269	-0.8524	-0.4025	-0.1686	-0.6758	-0.1746	0.069	-0.3754	0.1105	0.237	-0.341	-0.3774	-0.5672	-0.561	-0.4745	-0.6967	0.2882	-0.4079	-0.2815	0.6095	0.748	-0.2691	-0.4546
BP0128	probable periplasmic solute-binding protein	0.3664	-0.3648	-0.5131	-0.4803	-0.0598	-0.4102	-0.7023	-0.3213	-0.5829	-0.4911	0.1461	0.3451	-0.0565	-0.0813	0.3221	-0.1516	0.0235	-0.0212	-0.123	-0.472	-0.1312	-0.0052	0.0257	0.2297	-0.2308	-0.2724	-0.2113	-0.1123	0.0632	-0.209	-0.2785	0.258	0.0902	-0.2607	-0.031	0.0663	-0.1201	-0.1809	-0.3108	-0.1368	-0.0836	0.2986	-0.1789	-0.0738	0.4174	0.4714	-0.5541	-0.0125
BP0129	probable LacI-family transcriptional regulator (Pseudogene)	0.1545	-0.1189	-0.6065	0.023	-0.1809	-0.0943	-0.7221	0.363	-0.2725	-0.3783	0.1766	0.1126	-0.0016	-0.0219	0.2135	0.3867	0.5211	-0.1188	-0.1634	-0.2942	-0.2153	0.3407	0.471	0.5282	-0.1548	-0.1407	-0.0981	0.2576	0.1139	-0.1748	0.3127	0.5967	0.1476	-0.3446	0.1386	-0.0174	-0.2103	-0.2414	-0.1066	0.3718	0.1892	0.2394	0.0727	0.0533	0.6742	0.4097	-0.2694	0.2947
BP0130	amidase	0.0697	-0.0066	-0.1193	0.1215	-0.0788	0.1935	-0.0049	0.746	0.5447	-0.4711	0.0714	-0.0185	-0.1048	0.3759	0.3142	-0.4514	0.5152	0.051	0.1217	-0.1209	0.6401	0.3436	0.536	0.7257	0.4003	0.3755	0.1576	0.6577	-0.4813	-0.933	-0.4115	0.5361	0.0479	0.1945	0.4462	0.1409	0.1686	0.1164	0.1123	0.5979	0.6689	0.3139	0.6951	0.0138	0.6351	0.2707	0.1382	0.4721
BP0131	2-isopropylmalate synthase	-0.3879	-0.3344	-0.2784	-0.3585	-0.1564	-0.2294	-0.2312	0.143	0.1979	-0.6128	-0.1008	0.0356	0.1901	-0.1676	-0.3873	0.2965	-0.3455	-0.4603	-0.3915	-0.8139	-0.3454	-0.5925	-0.3111	0.3129	-0.257	-0.3698	0.0123	-0.1001	-0.201	-0.2508	-0.0378	0.0657	-0.228	-0.2618	-0.0214	-0.4395	-0.4219	-0.1923	-0.147	0.0104	-0.2338	-0.0817	0.0268	-0.5696	0.4253	0.2644	-0.2965	0.0583
BP0132	putative membrane protein	-0.0666	-0.3473	-0.0333	-0.3211	0.0258	-0.4535	-0.3525	-0.3679	-0.1964	-0.3185	0.0915	0.1241	-0.2012	-0.0286	0.0468	-0.1978	-0.2333	-0.0093	-0.2176	0.1916	-0.1979	-0.274	0.0474	0.0627	-0.2085	-0.0474	0.0324	-0.1414	0.1159	-0.1796	0.2256	1.0827	0.0611	0.2606	0.1272	-0.1263	-0.2271	-0.1333	-0.1867	0.0047	-0.2416	0.0016	0.0095	-0.023	1.4523	1.5246	0.0452	-0.1555
BP0133	RNA polymerase sigma-54 factor	0.0595	0.2768	0.4983	0.0014	0.2577	-0.0847	-0.2599	0.0793	0.0849	0.0355	0.2811	0.3366	0.4755	0.1968	0.0313	0.2635	-0.228	0.3724	0.1342	-0.2976	0.033	-0.3251	-0.1333	0.2853	0.0342	-0.1475	0.3598	0.1645	0.2491	0.0786	0.2827	0.662	0.1206	0.0898	0.3992	-0.1306	0.177	0.2399	0.1443	0.1046	-0.1459	0.0754	0.2175	0.3734	0.7552	1.0905	0.2915	0.1144
BP0134	putative bacterioferritin-associated ferredoxin	-0.3549	-0.1421	0.0587	-0.2667	-0.0383	0.2923	0.503	0.5283	0.5537	-0.2221	0.0019	0.0931	0.0511	0.1767	0.2603	0.1924	0.3502	-0.1071	-0.0723	-0.3266	0.4029	0.4658	0.4703	0.64	-0.0741	0.0408	0.4382	0.3007	0.0588	-0.0831	0.1367	0.745	0.2207	-0.2307	0.3305	-0.0429	0.0832	0.2045	-0.0247	0.2042	0.5697	0.2896	0.5874	0.6233	0.8167	1.0571	-0.0293	0.212
BP0135	probable LysR-family transcriptional regulator	-0.0971	-0.0734	-0.01	-0.2724	-0.0364	-0.3904	-0.446	-0.1692	-0.1308	-0.4983	0.3249	0.1285	-0.0326	-0.0066	0.063	0.7615	-0.037	-0.0926	-0.2105	-0.1279	-0.2377	-0.2002	0.1185	0.2575	-0.2503	-0.2031	-0.1205	-0.0726	0.0495	-0.316	0.0787	0.6434	-0.0122	-0.0023	0.0868	-0.251	-0.0826	-0.183	0.1031	-0.0387	-0.1225	0.1242	0.0314	0.032	0.8556	1.0543	0.093	0.0245
BP0136	putative integral membrane protein (Pseudogene)	0.3249	0.1012	0.7698	-0.282	0.3521	0.315	0.49	-0.296	-0.2392	-0.2604	0.8149	0.2656	0.4192	-0.0705	0.3316	-0.0815	0.0809	1.3313	0.8905	1.722	-0.2949	0.2004	0.6759	0.4114	0.1948	0.1878	0.4033	0.1965	-0.5235	-0.3827	0.5929	0.3097	0.1035	0.6047	0.3655	-0.049	0.3993	0.5567	0.4216	0.2751	0.4653	0.0884	-0.0518	0.6374	0.4885	1.1559	0.1808	0.3256
BP0138	C-terminal region of an outer membrane porin (Pseudogene)	-0.0288	-0.1118	-0.388	-0.4411	-0.2052	-0.6589	-0.6256	-0.5108	-0.673	-0.6068	0.2802	0.0924	-0.1088	-0.0717	-0.0479	-0.3294	-0.0936	-0.4766	-0.525	-0.4905	-0.4463	-0.2914	-0.0932	0.0014	-0.238	-0.2658	-0.4444	-0.2835	0.0264	-0.2278	0.0376	0.5667	-0.1935	-0.2189	-0.116	-0.3039	-0.1809	-0.2988	-0.264	-0.3803	-0.4841	0.0273	-0.2581	0.0587	1.0773	0.8128	-0.4912	-0.0663
BP0139	threonine dehydratase biosynthetic	0.1877	0.1697	-0.2326	0.1565	0.0345	-0.2521	-0.2886	0.3003	-0.2085	-0.3556	0.1911	0.2021	0.2394	0.1668	0.3137	0.2184	0.3812	0.0602	-0.0767	-0.5641	0.0947	0.1116	0.3604	0.5149	-0.077	-0.1421	0.1479	0.4939	0.2927	-0.0815	0.2719	0.0387	0.0548	-0.3169	0.1828	-0.0518	-0.0131	0.0362	0.0596	0.4584	0.256	0.2022	0.1214	-0.1607	0.2793	0.2813	-0.1199	0.4141
BP0140	conserved hypothetical protein (pseudogene)	0.0978	0.2681	0.5214	0.3085	0.2069	-0.3155	-0.0766	0.3891	0.2626	-0.1989	0.1844	0.3811	0.3585	0.3199	0.1209	-0.187	0.2162	0.5352	0.1748	0.4621	0.5369	0.2353	0.2384	0.6205	0.5296	0.713	0.3531	0.3836	0.4146	0.2202	0.3153	0.3115	0.5696	0.3499	0.4819	0.0571	0.3201	0.6592	0.2926	0.8741	0.524	0.3532	0.4662	0.5118	0.4603	0.4601	-0.2592	0.7927
BP0141	probable iron-sulfur binding oxidase	-0.0841	0.2257	0.3262	-0.2372	0.1806	-0.5365	-0.2044	-1.0243	-0.8508	0.0375	0.093	0.2186	0.1981	-0.0276	-0.0389	-1.1745	-0.5626	-0.0415	-0.1582	-0.4295	-0.4753	-0.3592	-0.5636	-0.2192	-0.2546	-0.5613	-0.2716	-0.4679	0.7126	0.5031	0.5639	0.3812	0.0237	-0.1598	0.0031	-0.2117	0.0408	-0.0641	-0.4499	-0.5549	-0.4426	-0.0095	-0.3695	-0.0465	0.4386	0.6687	-0.3396	-0.303
BP0142	GntR family transcriptional regulator	-0.2201	-0.2836	-0.5762	-0.3331	-0.6506	-0.7274	-1.3062	-0.9408	-1.2499	-0.4137	-0.4436	-0.3661	-0.4839	-0.4876	-0.4537	0.2599	-0.6551	-0.5156	-0.7253	-1.0629	-0.6341	-0.862	-0.8269	-0.516	-0.7034	-0.7762	-0.5412	-0.3307	-0.1968	-0.5345	-0.3343	0.0195	-0.5357	-1.2101	-0.6796	-0.8137	-0.4732	-0.8153	-0.8462	-0.7194	-0.8343	-0.3418	-0.7338	-0.4735	0.0965	0.2641	-0.7121	-0.5373
BP0143	conserved hypothetical protein	0.073	-0.3986	-0.5103	-0.348	-0.2329	-0.5051	-0.7427	0.8817	0.3435	-0.8096	0.0895	0.3932	-0.1733	-0.0116	0.4416	0.2554	0.0022	-0.0912	-0.2473	-0.0778	-0.1746	0.02	0.0182	0.5515	0.3002	0.1588	0.2109	0.2903	0.3048	-0.069	0.4426	0.208	-0.1972	0.0222	0.404	-0.3583	-0.1671	-0.3515	-0.2704	-0.3341	-0.434	0.1689	0.1096	-0.3486	0.6081	0.6252	-0.7186	0.0909
BP0144	putative lipase	0.2566	-1.0624	-1.0948	-0.5895	2.2388	-0.5667	-1.4427	-0.3243	-0.3837	-0.1667	0.0535	0.4445	-0.2397	0.1921	0.5768	0.3373	0.1352	-0.343	-0.4079	-0.4935	-0.1923	-0.36	-0.2605	0.1399	-0.6654	-0.8922	-1.2775	-0.4848	0.3312	-0.8901	-0.0895	-0.075	-0.0176	0.0352	0.2791	-0.1026	-0.5325	-0.7767	-0.8894	-0.4327	-0.9858	0.3141	-0.0608	-0.8072	0.6488	1.1191	-0.0112	-0.6923
BP0145	putative enoyl-CoA hydratase/isomerase	0.2428	-0.6683	-1.0991	-0.6006	0.097	-0.909	-0.9188	-0.7995	-0.6915	0.1174	0.2197	0.7133	-0.3717	0.3465	0.9955	0.0238	0.1851	-0.4336	-0.4915	-0.5547	-0.4166	-0.7614	0.3578	-0.4237	-0.1832	-0.589	-0.9273	-0.707	0.6646	-0.5593	-0.2187	0.3583	-0.4108	0.3605	0.6274	0.2278	-0.3878	-0.8375	-0.7433	-0.6437	-0.4272	0.4933	-0.3456	-1.3075	0.8883	1.1343	-0.5049	-0.7407
BP0146	putative hydroxylase (Pseudogene)	0.3087	-0.6547	0.27	-0.4178	-0.0681	-0.3158	-0.0431	-0.1045	-0.7312	0.0542	0.0811	0.2346	0.1658	0.2143	0.4977	-0.1251	-0.2233	-0.2537	-0.0104	-0.5786	-0.104	-0.0503	0.0286	-0.0332	-0.0298	0.0002	-0.0554	-0.0417	0.0629	-0.0323	0.4832	0.4393	0.0471	0.103	0.2356	0.1954	-0.0184	-0.2055	-0.1958	0.079	-0.1724	0.0996	0.0286	0.2003	0.5606	0.3928	0.3099	-0.2145
BP0148	putative exported protein	-0.0074	-0.8787	-0.0017	-0.858	-0.1903	-0.3159	-0.7811	-0.9809	-0.5947	0.0073	0.2072	0.5983	-0.1416	0.1666	0.7796	-0.0151	-0.1081	-0.3374	-0.4693	-0.6198	-0.5199	-0.7692	-0.1723	-0.1655	-0.4078	-0.9725	-0.4983	-0.7121	0.3675	-0.6523	-0.6343	-0.0696	-0.1332	-0.2368	0.1322	-0.2185	-0.3968	-0.7667	-0.4155	-0.8554	-0.8211	0.5943	-0.4248	-0.6158	0.9303	1.6147	-0.2037	-1.1891
BP0149	probable transcriptional regulator	-0.024	0.1986	0.3411	0.3236	0.2293	-0.2358	-0.0484	0.3564	0.4912	-0.1469	-0.1879	0.0637	0.2837	0.2465	-0.2208	-0.1563	0.2253	0.3147	0.2086	0.0478	0.4256	0.1005	0.2933	0.5681	0.1299	0.3128	0.6542	0.5911	-0.0005	0.1571	0.1641	1.3107	0.6664	0.1033	0.3692	0.1878	0.3042	0.4331	-0.0389	0.5465	0.2561	0.3567	0.7417	0.7911	0.996	0.7973	0.2642	0.6745
BP0150	conserved hypothetical protein (Pseudogene)	0.0006	-0.1122	0.0614	0.0354	0.0182	-0.3984	-0.2151	0.0628	0.143	-0.5296	-0.1276	0.1659	-0.12	0.3252	0.1617	0.1797	0.0794	0.0877	-0.0938	-0.8232	-0.0653	-0.1476	0.0922	0.3921	0.0805	0.2857	0.2792	0.1006	0.2242	-0.027	0.1874	0.3651	0.0793	-0.2355	0.3185	-0.1067	-0.0275	-0.0226	-0.0956	0.0317	-0.1357	0.3628	0.2424	0.0078	0.3235	0.1982	-0.1352	0.2663
BP0151	conserved hypothetical protein	0.1537	0.0638	0.5628	0.2576	0.1824	-0.2317	-0.167	0.4102	0.5097	-0.338	0.2354	0.4685	0.1407	0.4209	0.1462	0.1525	0.3097	0.4132	0.1223	-0.0838	0.0681	-0.2201	0.0026	0.5137	0.3	0.3274	0.5443	0.5859	0.3639	-0.0231	0.006	0.4124	0.2133	0.3767	0.6851	0.0809	0.1728	0.2712	0.5628	0.4543	0.2093	0.5803	0.3414	0.136	0.4207	0.4145	-0.008	0.6231
BP0152	conserved hypothetical protein	-0.3251	-0.0566	-0.0022	0.0765	0.2076	-0.222	-0.3265	0.4091	0.2562	-0.5881	-0.0019	0.3403	0.0172	0.3397	0.1756	0.6129	0.2313	0.3229	0.0697	-0.084	0.0589	0.0967	0.5506	0.5831	0.1777	0.3599	0.3376	0.3494	0.2904	-0.1257	-0.0492	0.3665	0.2899	0.2175	0.4368	0.1803	0.0545	0.0621	0.0658	0.4968	0.435	0.2878	0.3195	0.0292	0.457	0.3464	-0.2231	0.5322
BP0153	probable dioxygenase	0.167	-0.0616	0.2123	-0.5636	-0.2322	-0.3499	-0.3992	-0.4779	-0.4504	-0.4499	0.4045	0.1167	0.2586	-0.0382	0.0431	-0.1665	-0.1398	-0.0959	-0.0474	0.4247	-0.2228	0.0156	0.3979	0.1633	-0.0742	0.5072	0.0897	-0.1078	-0.265	-0.1923	0.3972	0.1647	0.0324	0.2319	0.3154	-0.0602	-0.0091	0.2539	-0.079	-0.1987	0.0574	0.1988	-0.1483	0.2373	0.3398	0.4394	0.0296	0.0444
BP0154	LysR family transcriptional regulator	-0.1296	0.1443	0.1545	-0.1113	-0.1868	-0.1277	-0.3307	-0.0681	-0.0047	-0.1968	-0.0818	0.03	0.0882	0.2785	0.3869	-0.0217	-0.0565	0.2055	0.0113	-0.5509	0.0599	-0.0263	0.1119	0.575	0.2079	0.0336	0.1042	0.0188	0.053	-0.1491	-0.0727	0.5498	0.2182	-0.1759	0.2729	0.0601	-0.0359	0.1398	-0.0643	0.0919	0.1919	0.1158	0.2334	0.2951	0.4265	0.4271	-0.2479	0.2514
BP0155	D-3-phosphoglycerate dehydrogenase	0.4286	0.1302	-0.1973	0.0562	0.1265	-0.4688	-0.4218	-0.3384	-0.4456	-0.2493	0.1345	0.3037	0.205	0.3679	0.0226	-0.2667	-0.0544	-0.0582	0.1544	-0.7002	-0.2145	-0.318	-0.4517	0.1599	-0.0565	0.036	0.0627	0.1518	0.2331	-0.1604	0.1465	0.9431	-0.0677	-0.5886	0.1582	-0.2217	-0.0111	0.1129	-0.1456	0.1979	-0.5641	0.3155	-0.1221	-0.1138	0.8457	0.8921	-0.0374	0.2669
BP0156	putative exported protein	0.0171	0.0878	-0.013	0.2103	0.2468	-0.2874	-0.6998	0.3012	0.3133	-0.4203	-0.112	0.2018	0.3939	0.3284	-0.134	-0.0497	0.1711	0.318	0.2256	-0.6069	0.1771	-0.1229	-0.0478	0.4215	0.1408	0.1635	0.4358	0.6277	0.2376	0.0729	0.0539	0.3833	0.233	-0.295	0.3087	0.0747	0.2128	0.204	-0.085	0.5661	0.1485	0.2072	0.4487	0.5175	0.3511	0.163	-0.4025	0.5049
BP0157	two-component sensor kinase	0.2208	0.1297	0.0769	-0.2423	0.1597	-0.4558	-0.2612	-0.3877	-0.3877	-0.1655	0.2445	0.2096	0.114	0.0654	-0.119	-0.7099	-0.1614	0.2137	-0.1461	-0.3783	-0.1092	0.1622	0.0564	0.2592	0.2132	0.4117	0.2825	0.0286	-0.3265	-0.2452	-0.1069	0.4373	-0.0763	-0.2993	0.1178	-0.2507	0.0363	0.1874	-0.0148	-0.0532	0.0002	0.0664	-0.0816	0.167	0.3735	0.6212	-0.2034	0.1807
BP0158	two-component response regulator	0.1458	0.0826	0.2534	0.1821	-0.1352	-0.2286	-0.3774	0.133	0.0283	-0.084	0.224	0.2297	0.1785	0.1897	-0.0036	-0.4794	0.1451	0.1126	-0.1947	-0.9792	0.0909	-0.0389	0.0009	0.3528	0.0776	-0.025	0.3012	0.2029	0.3658	-0.0627	0.3627	0.2174	-0.009	-0.7342	0.0221	-0.0494	0.1382	-0.1678	-0.0594	0.1457	0.0162	0.2213	0.1659	0.22	0.3968	0.0865	0.2102	0.1138
BP0159	phosphate regulon sensor protein	0.0447	-0.1069	-0.0643	-0.0561	-0.0328	-0.3575	-0.4189	-0.1515	-0.0245	-0.1161	-0.1129	0.1168	-0.0502	0.2273	0.1023	0.1926	-0.0015	0.1721	-0.0559	-0.5648	0.1862	0.0563	-0.0895	0.3066	0.1501	0.2406	0.5033	0.2344	0.1884	-0.3133	0.0955	0.4726	-0.073	-0.5554	0.2518	-0.0934	0.0981	0.1485	0.1152	0.1709	-0.0706	0.2217	0.4637	0.284	0.5876	0.6553	0.1492	0.1278
BP0160	phosphate regulon transcriptional regulatory protein	0.1097	-0.0881	-0.2902	-0.0072	-0.049	-0.1154	-0.1161	0.2547	0.0451	-0.5866	0.2413	0.2978	0.1025	0.2921	0.5031	-0.357	0.4448	0.0306	0.147	-0.0914	0.1395	0.0425	0.3039	0.5493	0.1977	0.2461	0.4771	0.5338	0.1976	0.0054	0.2221	0.6995	0.3288	0.0411	0.3091	0.2225	0.1277	0.2235	0.3562	0.5852	0.1896	0.4477	0.3699	0.38	0.9174	0.8491	0.1643	0.6407
BP0161	ubiquinone/menaquinone biosynthesis methyltransferase	-0.2518	-0.154	0.1475	-0.3207	-0.2396	-0.5639	-0.3965	-0.4444	-0.4206	-0.1928	-0.2189	-0.0108	-0.095	-0.0429	-0.199	-0.1708	-0.4504	-0.1837	-0.5393	-0.5156	-0.4989	-0.377	-0.536	-0.2103	-0.3457	-0.4757	-0.3214	-0.3534	0.0268	-0.311	-0.106	0.8459	-0.2649	-0.1928	-0.0046	-0.5105	-0.0924	-0.0974	-0.1551	-0.3022	-0.4316	-0.062	-0.3171	0.1081	0.8894	1.0521	-0.269	-0.2537
BP0162	putative membrane protein	-0.1928	-0.3215	-0.4453	0.3189	0.0287	-0.6723	-0.4064	0.5199	0.4001	-0.3877	-0.0248	0.2026	-0.4298	0.0964	-0.3238	0.9996	-0.0097	-0.2369	-0.3885	-0.4504	-0.1333	0.1825	0.085	0.2802	0.251	0.4025	0.0168	0.453	0.0152	-0.2933	-0.1635	0.8319	0.2131	0.0579	0.2011	0.0416	-0.1675	-0.065	-0.168	0.4431	0.1662	0.2147	0.5931	-0.0937	0.663	0.3785	0.0664	0.6056
BP0163	conserved hypothetical protein	0.1858	0.013	0.9778	-0.6989	0.0151	0.0363	0.1233	-0.5016	-0.2555	-0.4811	0.6321	0.1436	0.1623	0.2155	0.2487	0.1988	-0.2184	0.0508	-0.441	0.4975	-0.047	-0.2691	0.0929	-0.0248	-0.0282	0.5321	0.1495	-0.3158	-0.0942	-0.2489	0.8157	0.2926	-0.4492	0.475	0.462	-0.3396	-0.0804	-0.0265	0.0986	-0.4429	-0.124	0.2487	-0.1316	0.3343	0.543	1.4151	0.0748	-0.3572
BP0164	probable ubiquinone biosynthesis protein	-0.4107	-0.0686	-0.2441	-0.1701	0.0174	-0.4648	-0.4174	0.1292	0.0149	-0.2974	-0.1035	0.1059	-0.0826	0.1605	0.2012	-0.2666	0.0045	-0.1737	-0.1239	-0.148	-0.0629	0.1252	0.1828	0.4551	0.0446	-0.0907	0.1693	0.2168	0.3738	-0.0699	0.3191	0.4297	0.097	0.1033	0.2475	-0.0267	0.13	-0.1275	-0.3481	-0.0648	-0.1074	0.261	0.2098	0.3623	0.6225	0.577	-0.0542	0.1632
BP0165	conserved hypothetical protein (Pseudogene)	-0.07	0.1503	-0.1258	0.1026	-0.0948	0.1264	-0.0113	0.341	0.0665	-0.5622	-0.0161	0.0343	0.074	0.0851	0.0509	0.13	0.2094	-0.3237	-0.3631	-0.481	-0.0415	0.0825	0.068	0.5287	-0.1466	-0.152	0.1713	0.4397	-0.1547	-0.2594	0.1491	0.1713	-0.129	-0.2389	-0.1086	-0.1861	0.1328	0.0089	-0.0817	0.2503	-0.0958	0.0157	-0.0259	0.3894	0.1583	0.1841	-0.6776	0.16
BP0167	C-terminal region of a probable ABC transporter, ATP-binding protein (Pseudogene)	0.3207	-0.8544	-0.529	-0.4778	0.3155	-0.2933	-0.3057	-0.399	-0.7752	-0.4169	0.5311	0.2402	-0.0815	0.1648	0.6177	0.2245	0.0715	-0.4659	-0.4887	-0.1259	-0.2651	-0.5702	-0.4119	0.0081	-0.5473	-0.607	-0.6014	-0.5518	0.0188	-0.4918	0.1699	0.3812	-0.3172	0.0406	0.227	-0.2355	-0.0882	-0.1382	-0.6058	-0.3533	-0.922	0.2176	-0.4	-0.219	0.689	0.4816	-0.3646	-0.1284
BP0168	putative membrane protein	-0.1343	0.1306	0.0674	-0.2847	-0.1028	-0.0677	-0.1725	-0.0722	-0.0893	-0.4705	-0.128	-0.0713	-0.1166	0.3181	0.0961	0.4275	0.138	0.1508	0.0525	-0.0657	0.1953	0.1351	0.3567	0.6599	0.3443	0.2495	0.3122	0.2948	0.1409	-0.3743	-0.0045	0.1498	0.1843	0.0888	0.3901	0.0609	0.2374	0.2256	-0.0884	0.2648	0.1712	0.3489	0.3414	-0.0371	0.4628	0.5371	-0.0361	0.2898
BP0169	putative exported protein	0.0627	-0.0408	0.5497	-0.1977	0.1308	0.2324	0.3088	0.0255	0.1289	-0.2418	0.1978	0.204	0.0965	0.3108	0.3269	-0.1172	0.1664	0.3132	0.1386	0.1896	0.1787	0.0396	-0.0255	0.3183	0.3413	0.343	0.459	0.2662	0.0745	-0.0007	0.1873	0.0886	0.3429	0.3107	0.4086	0.1902	0.301	0.5094	0.4691	0.2011	0.1398	0.3322	0.3721	0.0753	0.3561	0.4981	0.3443	0.2883
BP0170	putative ATP-dependent RNA helicase	0.3233	0.1666	0.0512	0.4638	-0.1829	-0.3595	-0.3503	0.2097	-0.0276	0.0042	0.4051	0.1527	0.3829	0.0312	0.1453	0.2328	0.2848	0.0576	0.1319	-0.5741	0.0365	0.3053	0.4633	0.6058	0.1741	0.5122	0.4353	0.6472	0.2328	0.3777	0.6545	0.1542	0.1695	-0.4869	0.045	0.0701	0.0435	0.0027	0.0867	0.51	0.2239	0.1602	0.1968	-0.0479	0.0917	0.0508	0.4556	0.3882
BP0171	LysE family efflux protein	-0.0372	0.099	0.1334	0.1923	-0.1264	-0.3108	-0.3604	0.0655	-0.0271	-0.4359	0.1431	0.3184	0.2499	0.2381	0.2149	0.3884	0.2539	0.1261	0.1157	-0.1307	-0.0217	0.1861	-0.2246	0.3941	0.1728	0.236	0.2557	0.4074	0.3697	0.0613	0.3031	0.5278	0.0261	0.0093	0.1997	-0.1737	0.065	0.0067	-0.0618	0.233	-0.1263	0.2079	0.0505	-0.0406	0.6107	0.5707	-0.2698	0.3329
BP0172	peptide chain release factor 3	0.1359	0.1435	0.455	-0.372	-0.0901	-0.0831	-0.435	-0.546	-0.3769	-0.2544	0.1382	0.2624	0.1901	0.2026	0.1495	-0.4082	-0.191	0.1393	0.0008	0.12	0.0262	-0.2358	-0.4967	0.2024	0.1785	-0.0764	0.0828	-0.0153	0.2978	-0.0264	0.1413	0.34	0.1163	0.2932	0.3703	-0.12	0.1845	0.142	-0.0459	-0.1579	-0.2831	0.3246	0.1111	-0.0391	0.5153	0.654	-0.034	-0.009
BP0173	putative exported protein	0.0617	0.3198	0.125	0.0054	0.0589	-0.2115	-0.2831	-0.0329	0.0337	-0.077	0.1115	0.144	0.0175	0.2868	0.0259	-0.5498	0.1724	0.0433	0.0983	-0.5542	-0.0204	-0.0565	0.1215	0.528	0.1369	-0.0027	0.2722	0.1792	0.4586	0.0278	0.0702	1.0247	0.3396	-0.4563	0.2791	0.0303	0.1987	0.3805	0.0022	0.1983	0.0471	0.3372	0.2644	0.3445	0.8509	0.9295	0.1568	0.3479
BP0174	bacterioferritin	0.2749	0.3438	0.2465	0.5092	0.0827	0.2709	0.1348	0.4632	0.0499	0.1682	0.239	0.0649	0.337	0.3143	0.1722	-0.478	0.2169	0.3457	-0.2167	-0.4956	-0.0129	0.3352	0.3126	0.528	0.014	-0.268	0.017	0.3747	-0.2041	-0.3223	-0.1345	0.3308	0.2415	-0.1994	0.017	-0.1872	0.297	0.31	0.196	0.3978	0.3578	0.1345	-0.0126	0.4435	0.4072	0.5017	0.1479	0.3908
BP0176	two-component response regulator (Pseudogene)	-0.3266	-0.4639	-0.8931	-0.4213	-0.4046	-0.5924	-0.8482	-0.4564	-0.7421	-0.8273	-0.2262	-0.3706	-0.6108	-0.37	-0.3914	-0.023	-0.3018	-0.7533	-0.6056	-0.4708	-0.5968	-0.4859	-0.1477	0.0127	-0.5955	-0.7343	-0.7597	-0.0981	-0.5161	-1.0815	-0.7784	-0.4292	-0.7404	-0.4396	-0.4913	-0.7949	-0.2269	-0.3743	-0.7256	-0.2018	-0.2754	-0.3349	-0.5569	-0.4393	0.0855	-0.389	-0.6365	-0.0534
BP0177	putative lipoprotein	-0.0744	-0.2199	-0.1403	-0.38	-0.2838	-0.6	-0.7269	-0.3005	-0.3739	-0.5389	-0.1302	0.0238	-0.3419	0.1838	-0.0568	0.3419	-0.0013	-0.0907	-0.0973	-0.3859	-0.1661	-0.3847	-0.4653	0.3253	0.0879	0.1152	0.1961	0.1009	0.4526	-0.0161	0.0224	0.7884	0.0728	-0.0874	0.3476	0.0394	-0.0279	-0.0912	-0.1589	0.1744	-0.4047	0.3254	0.1004	0.099	0.9253	0.7247	-0.1838	0.1521
BP0178	putative lipoprotein	-0.1038	-0.175	-0.3107	-0.1811	-0.085	-0.3641	-0.1046	0.3925	0.2118	-0.5699	0.0134	0.2476	-0.0422	0.2901	0.2419	0.1748	0.3454	0.1273	0.2616	0.2238	-0.0761	0.0622	0.3333	0.7221	0.2232	0.2827	0.2789	0.3658	0.1598	-0.1916	-0.0051	0.3396	0.3648	0.435	0.5172	0.1915	0.0876	0.27	0.1879	0.5473	0.1645	0.4628	0.4562	0.0604	0.6032	0.387	0.0415	0.5286
BP0179	conserved hypothetical protein	-0.2036	-0.224	-0.1616	-0.2855	-0.0196	-0.247	-0.1828	0.1566	0.0616	-0.146	-0.1076	0.0165	0.0396	0.0114	0.023	0.1875	-0.1009	0.1873	0.2231	0.1083	-0.2017	-0.0205	0.0586	0.3407	-0.0496	-0.0336	0.1427	0.0575	-0.2255	-0.2716	-0.0572	0.0373	0.2469	0.0764	0.2181	0.0185	0.0957	0.2878	0.1838	0.3624	0.0882	0.1935	0.1851	0.151	0.3881	0.4214	0.2787	0.3318
BP0180	methionyl-tRNA synthetase	0.1274	-0.1263	-0.1428	0.2563	0.1496	-0.4727	-0.2432	0.2737	0.0816	0.1349	0.35	0.1891	0.4116	0.2837	0.2882	0.0118	0.4406	0.3638	0.186	-0.2156	0.02	-0.0523	0.1879	0.59	0.149	0.1873	0.3594	0.6747	0.0738	-0.057	0.4277	-0.3307	0.0337	-0.0791	0.2218	0.0436	0.0728	0.3972	0.2496	0.743	0.1895	0.267	0.2826	-0.045	-0.0084	-0.1134	0.434	0.6504
BP0181	putative exported protein	-0.2045	-0.3975	-0.0333	-0.5339	-0.0058	-0.7633	-0.8193	-0.5808	-0.3725	-0.8216	-0.3748	0.0064	-0.3686	0.2234	-0.0992	-0.5884	-0.3386	0.2931	-0.358	-0.0639	-0.387	-0.5291	-0.1123	-0.0775	-0.005	-0.1991	0.0454	-0.0446	0.2677	-0.5406	-0.4734	1.1691	-0.0672	0.3153	0.2981	-0.2973	0.0745	-0.0183	0.0383	-0.0831	-0.5703	0.2431	-0.1186	0.0746	1.2267	1.3186	-0.6165	-0.0363
BP0182	putative iron sulfur binding protein	-0.0229	0.1135	-0.0374	-0.1089	-0.1068	-0.2745	-0.2937	-0.184	-0.4117	-0.4278	-0.2758	-0.2621	-0.2271	-0.0248	-0.1374	0.1296	-0.1194	-0.0302	-0.3326	-0.7667	-0.3665	0.1195	0.2372	0.3094	-0.1026	-0.3251	-0.1094	-0.0409	-0.0377	-0.5173	-0.1323	0.7242	-0.0504	-0.4824	0.0133	-0.3736	0.0719	0.1297	-0.2204	-0.0796	0.2881	-0.1487	-0.1591	0.2342	0.8009	0.9152	-0.2263	0.0413
BP0183	putative exported protein	0.6994	0.2133	0.2317	-0.391	0.231	-0.534	-0.3469	-0.465	-0.3443	0.1508	0.0868	0.1205	0.1623	0.1808	0.1537	-0.1043	-0.0466	-0.0202	-0.1117	-0.3597	-0.0102	0.7353	-0.1554	0.0718	0.2407	0.2057	0.3727	0.1332	-0.0528	-0.3934	-0.1631	0.6893	0.2324	-0.1725	0.2839	0.0186	0.1716	0.1085	-0.0958	0.0037	-0.1661	0.3051	-0.0584	0.2532	0.7163	0.9856	0.2553	0.019
BP0184	putative exported protein	0.2145	0.1053	0.1633	-0.2082	0.1226	-0.3284	-0.5666	-0.408	-0.485	-0.0001	0.2875	0.2646	0.2086	0.3103	0.2653	-0.2711	0.0776	0.0154	-0.1989	-0.6337	-0.0818	-0.4752	-0.1536	0.4907	0.0453	0.1709	0.0534	0.1334	0.133	-0.3917	0.1957	0.5935	0.1662	-0.2945	0.2624	0.0652	0.1415	0.1343	-0.1723	0.0119	-0.2878	0.4077	-0.0493	0.2559	0.8308	0.9033	-0.0771	0.0988
BP0185	deoxycytidine triphosphate deaminase	0.0174	-0.0186	-0.2739	-0.0804	-0.1933	-0.5894	-0.6353	-0.226	-0.192	0.0539	-0.0547	0.2026	0.0483	0.2829	-0.133	-0.6055	-0.009	0.0607	0.0936	-0.7012	-0.1707	-0.1851	-0.2475	0.3366	0.0594	-0.0816	0.1553	0.0942	0.0362	-0.4191	-0.43	0.3966	0.2284	-0.2065	0.3262	-0.09	0.0481	-0.0218	-0.0501	0.2101	-0.1626	0.2342	0.0914	-0.067	0.5304	0.1843	0.1934	0.1384
BP0186	conseved hypothetical protein	-0.2978	0.1404	-0.414	0.6136	-0.1369	-0.2919	-0.4001	0.4125	0.1953	-0.4139	-0.1171	-0.1876	-0.0583	0.0806	-0.2998	-0.37	0.0717	0.1112	-0.0066	-0.6667	0.1639	0.0295	0.4786	0.6013	0.0415	0.2972	0.2926	0.8701	-0.1111	-0.1365	0.0683	0.8799	0.2361	-0.3981	-0.2294	-0.2129	-0.0531	0.1246	-0.1532	0.7741	0.4084	0.0918	0.2907	0.3357	0.5357	0.3479	0.0799	0.7336
BP0187	putative lyase	0.0309	-0.2641	0.0465	-0.22	-0.0553	-0.5803	-0.2907	-0.192	-0.1891	-0.7572	-0.0272	0.0235	-0.1484	0.1379	-0.2097	0.2723	-0.1117	-0.1624	-0.3693	-0.6172	-0.3124	-0.457	-0.1983	0.2855	-0.1132	-0.2224	-0.1484	-0.0165	0.0674	-0.492	-0.0832	0.691	-0.181	-0.3599	0.2421	-0.4807	-0.1242	-0.1517	0.1892	0.0334	-0.3907	0.1013	-0.0581	-0.0318	0.8631	1.0123	-0.2513	0.0731
BP0188	putative acetyltransferase (Pseudogene)	-0.0193	0.0089	0.2748	-0.0032	0.0489	0.186	0.4729	-0.0108	-0.3042	-0.3377	0.4449	-0.0045	0.1779	-0.0591	0.0462	-1.0738	-0.0938	0.0457	-0.1895	0.1471	-0.2547	0.3465	0.8441	0.3833	-0.0064	0.0472	0.0111	0.2349	-0.4375	-0.1559	0.3156	0.6971	0.0923	0.2622	0.1255	-0.2333	0.1735	0.406	0.3609	0.3457	0.4818	-0.2276	-0.0478	0.483	0.599	0.9682	-0.0438	0.4252
BP0189	hypothetical protein	-0.4123	-0.4284	-0.5596	-0.0262	-0.4867	-0.8142	-0.6908	0.0367	-0.4007	-0.8288	-0.4194	-0.3273	-0.5948	-0.2939	-0.569	0.1044	-0.1136	-0.4863	-0.6293	-1.3449	-0.3937	-0.1147	-0.0591	0.3826	-0.3168	-0.424	-0.3454	-0.0777	-0.0311	-0.5122	0.3009	1.2919	-0.3457	-1.0493	-0.2837	-0.7122	-0.2886	-0.4347	-0.5948	0.2544	-0.1921	-0.2601	-0.0693	-0.1363	1.7436	1.4437	-0.3522	0.107
BP0190	probable orn/arg/lys decarboxylase	-0.2475	-0.2619	-0.4985	-0.0463	-0.3788	-0.0864	-0.0065	0.3325	0.0901	-0.5659	-0.0665	-0.099	-0.0935	-0.0002	0.0262	0.2852	0.2197	-0.1742	0.0526	-0.0098	-0.0346	-0.1167	0.0655	0.3722	-0.0778	0.0529	0.0389	0.5175	0.1146	-0.0225	0.1732	-0.1778	0.2179	0.1787	0.0793	0.0088	-0.0044	0.2741	0.0024	0.7541	0.1402	0.1889	0.0833	-0.1024	0.1182	-0.2057	-0.0541	0.5037
BP0191	putative exported protein	-0.1172	-0.1206	-0.0531	-0.2251	-0.2556	-0.3687	-0.4569	0.0431	-0.175	-0.1452	0.0316	0.0937	-0.3222	-0.0101	0.1421	-0.1571	0.1788	-0.0282	0.0275	-0.1812	0.0602	-0.2358	-0.2877	0.1811	0.0405	-0.0409	0.0198	0.1391	-0.1629	-0.4134	-0.1465	0.3299	-0.0523	0.0597	0.1861	-0.1058	-0.0564	-0.0956	-0.0253	0.1137	-0.3161	0.172	0.0488	0.0058	0.4015	0.3711	0.1494	0.0985
BP0193	superoxide dismutase [Mn]	0.0241	-0.6106	-1.3081	-0.9539	-0.4624	-1.2646	-0.9248	-0.9399	-0.8437	-0.3108	-0.1316	0.2236	-0.3979	0.0293	0.4321	0.6606	-0.325	-0.6865	-0.7066	-0.5909	-0.635	-0.5089	-0.1913	-0.2846	-0.6507	-1.0504	-0.9903	-0.9857	-0.0331	-1.0292	-0.5684	0.2371	-0.3845	-0.1849	0.1608	-0.3246	-0.6147	-0.589	-1.0539	-0.9552	-0.9552	0.2791	-0.7346	-0.638	0.6823	0.6435	-0.8617	-0.9455
BP0194	probable metal transporter	0.0775	-0.3471	-0.1535	-0.1498	-0.0839	-0.5377	-0.5128	-0.1603	-0.2157	-0.4159	0.4551	0.311	0.0259	0.2082	0.2189	-0.6293	0.1688	0.0632	-0.1908	0.321	-0.2114	-0.2637	0.2934	0.3465	-0.1588	0.1974	-0.2252	0.0362	0.2167	-0.1126	0.5818	0.3552	0.1826	0.2207	0.4506	0.199	-0.0606	-0.0553	-0.1391	0.2227	-0.0659	0.328	-0.1227	-0.0118	0.7579	0.4952	0.0452	0.083
BP0195	glycine cleavage system T protein	-0.5844	-0.6668	-0.7913	-0.6761	-0.6486	-0.8858	-1.4363	-0.7036	-1.0433	-0.7981	-0.3336	-0.1626	-0.1363	-0.2592	-0.6561	-0.5041	-0.4387	-0.1038	-0.5816	-0.8358	-0.5956	-0.3844	-0.0678	0.1057	-0.4612	-0.2888	-0.2555	-0.1045	0.0132	-0.3278	-0.1884	1.257	-0.4259	-0.4258	-0.2655	-0.4294	-0.5297	-0.2142	-0.1924	-0.0004	-0.2959	-0.0895	-0.3712	0.4868	1.2578	1.1961	-0.4888	0.2195
BP0196	glycine cleavage system H protein	0.0714	-0.0591	0.328	0.0141	-0.1869	-0.1416	-0.2197	-0.1907	-0.4143	-0.1453	0.0813	0.0794	0.2814	0.3461	-0.0118	-0.0936	-0.0666	0.3445	-0.3707	-0.6777	-0.2852	-0.1592	-0.428	0.4735	-0.1247	-0.3147	-0.0148	0.2566	0.4062	-0.0489	0.391	0.4995	-0.0554	-0.3091	0.2922	-0.2646	0.0751	0.2527	0.2195	0.5336	-0.3165	0.3415	-0.3639	0.1523	0.5954	0.9574	0.1797	0.3804
BP0197	glycine cleavage system P protein	-0.3726	-0.3639	-0.0512	0.1823	-0.175	-0.3479	-0.5448	0.057	-0.4171	-0.5098	0.0232	-0.0139	0.2537	0.0129	-0.1421	0.3804	0.1582	-0.0619	-0.2041	-0.4023	-0.1695	-0.1773	0.0101	0.673	-0.1223	-0.1515	0.1362	0.3907	-0.2025	-0.2992	0.161	0.3298	-0.0249	-0.1225	0.0978	-0.2186	0.0472	0.1844	0.1343	0.4712	-0.0025	0.1579	-0.0209	0.1572	0.4913	0.7455	-0.1286	0.4989
BP0198	putative GntR-family transcriptional regulator	0.0977	-0.2863	0.1696	-0.5095	-0.2124	-0.4627	-0.5326	-0.4694	-0.4288	-0.8807	0.363	0.1237	0.1054	0.0109	0.1276	-0.1273	-0.1802	-0.0703	-0.2567	-0.1338	-0.3616	-0.5631	-0.2717	0.0943	-0.1308	-0.0419	-0.064	-0.2518	0.2072	-0.1121	0.6177	0.6425	-0.1322	0.1231	0.2954	-0.0617	-0.1708	-0.1612	0.1155	-0.223	-0.3621	0.1655	-0.1306	-0.0581	0.8761	0.9527	-0.19	-0.1569
BP0199	conserved hypothetical protein	0.0055	-0.4794	-0.017	-0.2918	-0.0063	-0.782	-0.5288	0.0155	0.1518	-0.2189	0.1752	0.4295	0.049	0.164	0.31	0.0219	-0.2223	0.1012	0.1111	-0.2114	0.0077	-0.3691	0.0713	0.1912	0.0384	-0.2373	0.0267	0.0356	0.1389	-0.3036	0.1739	0.2846	-0.1216	0.063	0.4043	-0.1727	0.0959	0.2116	0.1518	-0.0028	0.0654	0.1896	0.3616	-0.2956	0.569	0.5443	0.1755	0.1205
BP0200	putative exported protein	0.3881	-0.3649	-0.2536	-0.3053	-0.4674	-0.5778	-0.658	-0.028	0.104	-0.2798	0.1808	0.2985	-0.1011	0.3033	0.4859	0.5203	-0.107	0.1645	-0.3532	-0.3784	-0.1662	-0.1261	-0.0155	0.2112	-0.1637	-0.0577	0.0331	0.1479	0.3103	-0.213	0.2051	0.2923	-0.0088	-0.1291	0.2982	-0.0601	-0.3167	-0.149	-0.1107	0.1156	-0.1684	0.3033	0.2208	-0.2331	0.6416	0.7175	0.228	-0.2239
BP0201	probable enoyl-CoA hydratase (Pseudogene)	0.1979	-0.3917	-0.408	-0.2923	-0.2968	-0.5107	-0.7049	-0.0133	-0.0788	-0.7054	0.3377	0.3473	0.0502	0.0125	0.3598	0.3333	0.1559	-0.2767	-0.366	-0.0647	-0.2179	-0.2119	0.2751	0.4308	-0.1742	0.0137	-0.1618	0.0136	-0.0689	-0.529	0.5697	0.1868	-0.2113	0.0544	0.2375	-0.1874	-0.3858	-0.0499	-0.2001	0.1285	-0.0264	0.2764	0.0009	-0.313	0.5556	0.5094	-0.1225	0.1945
BP0204	putative restriction endonuclease	0.3941	0.3221	0.2965	-0.374	0.2431	0.0288	0.0372	-0.3675	-0.2588	-0.0005	0.0767	0.283	0.1659	0.1983	0.1506	-0.1734	-0.1666	0.1689	0.1218	-0.0932	-0.0096	-0.3148	-0.2237	-0.0783	0.1328	-0.0739	0.2243	-0.1085	0.5232	0.2883	0.3212	0.5612	0.3364	0.4507	0.4431	0.1929	0.1892	0.0475	-0.0773	-0.0084	-0.1191	0.3808	0.1834	0.1179	0.5939	0.5583	0.0891	-0.1669
BP0205	putative exported protein	-0.0648	-0.1436	-0.4996	-0.0002	-0.2179	-0.3181	-0.2874	0.048	-0.0601	-0.3236	-0.1562	0.0614	0.0417	0.2772	-0.219	-0.0471	-0.0755	0.0203	0.0323	-0.5962	-0.1713	-0.4443	-0.2307	0.2397	-0.0995	-0.0056	0.0936	0.26	0.3142	0.3258	0.3899	0.9312	0.3046	-0.1576	0.2149	0.2095	-0.0195	0.003	0.0054	0.2499	-0.2708	0.1957	-0.1038	0.1955	0.7515	0.4878	0.2685	0.4028
BP0206	thiamine biosynthesis protein	-0.0394	0.171	0.4953	-0.6291	-0.0638	0.0054	0.0588	-0.6493	-0.5171	-0.1755	0.0316	0.0656	0.4503	0.1584	0.1046	0.1415	-0.4777	0.2317	-0.2201	-0.3612	-0.1898	-0.4624	-0.6028	-0.1873	-0.0189	-0.3172	0.0751	-0.2945	0.2863	-0.0455	0.245	0.5867	0.0568	-0.222	0.2228	-0.1955	0.3174	0.3055	0.2357	-0.3423	-0.1665	0.4021	-0.0022	0.4533	0.6706	1.1239	0.32	-0.1617
BP0207	putative aldehyde dehydrogenase	0.088	-0.1407	0.1689	-0.6659	0.0663	-0.0253	-0.153	-0.4698	-0.3874	0.0221	0.2857	0.4631	0.1885	0.2281	0.3239	0.2803	-0.2035	-0.0861	-0.1022	-0.0843	-0.2005	-0.5476	-0.0693	0.0299	-0.2181	-0.1239	-0.0576	-0.4978	0.1217	-0.0304	0.2029	0.3938	0.0999	0.0221	0.2637	0.1128	0.1648	0.0046	-0.1735	-0.2718	-0.3827	0.3393	-0.0557	-0.05	0.6532	0.7874	0.1235	-0.1603
BP0208	putative oxidoreductase	-0.1788	-0.158	0.0234	-0.3499	-0.0899	-0.5562	-0.4634	-0.4377	-0.2992	-0.1706	-0.1017	0.1448	0.2212	0.1126	-0.0966	-0.6133	-0.3159	0.1037	-0.1652	-0.1227	-0.2059	-0.3676	-0.3854	0.0335	-0.0648	-0.2223	0.153	0.0677	0.0101	-0.1183	-0.0281	0.8668	0.1139	0.2294	0.1038	-0.1112	0.0234	-0.0624	-0.0306	0.0408	-0.2123	0.2255	0.0514	0.0563	0.9319	1.2007	-0.0831	-0.023
BP0209	putative GntR-family transcriptional regulator	-0.2023	-0.3498	-0.5544	-0.3272	-0.3738	-0.4761	-1.0512	-0.2095	-0.3183	-0.5258	-0.4434	-0.251	-0.475	-0.1731	-0.4582	0.3207	-0.112	-0.4431	-0.4708	-0.9084	-0.3021	-0.3795	-0.0584	0.2191	-0.2666	-0.3262	-0.1773	0.0581	-0.382	-0.5551	-0.2935	1.6166	-0.1822	-0.6625	-0.2545	-0.5332	-0.3594	-0.3918	-0.5476	0.0011	-0.2967	-0.1078	-0.151	-0.2595	1.6363	1.5153	-0.1538	0.0422
BP0212	putative hydrolase	0.1668	0.0886	0.7707	-0.0162	0.2688	0.0695	0.0609	-0.1863	-0.445	-0.4891	0.4408	-0.0416	0.3991	0.0713	-0.1851	-0.0949	0.0881	0.1383	-0.0904	0.0166	-0.1765	-0.1839	0.1093	0.4046	0.0019	-0.0504	0.0601	0.2215	-0.3147	-0.0961	0.2871	0.3611	-0.0984	0.2539	0.1917	-0.0807	0.0066	0.259	0.3065	0.0192	0.3221	-0.1058	-0.1205	0.2917	0.507	0.7902	0.0936	0.3304
BP0213	putative acetyltransferase	0.1367	-0.0609	-0.0149	-0.116	-0.0448	-0.3538	-0.5629	-0.1529	-0.2636	-0.9099	0.2046	0.2353	0.0809	0.1091	0.3591	-0.0309	0.3485	-0.1137	-0.2826	-0.2275	-0.2929	-0.3382	-0.1263	0.4212	-0.1604	-0.2358	-0.1146	0.1833	0.2185	-0.3729	0.5381	0.6454	-0.0645	-0.0664	0.2421	-0.0596	-0.1774	-0.3071	-0.1043	0.1363	-0.1053	0.2455	-0.1631	0.0309	0.8483	0.8434	-0.1351	0.1199
BP0214	Conserved hypothetical protein	-0.0532	0.007	0.0885	-0.2013	-0.2735	-0.5919	-0.3023	-0.1475	-0.2436	-0.414	-0.0892	0.0303	-0.179	0.0096	-0.0381	-0.3034	-0.0458	-0.1318	-0.1744	-0.362	-0.1221	-0.1241	-0.4484	0.1632	-0.0314	-0.2386	-0.0582	0.0524	-0.0789	-0.2737	0.0833	0.2952	0.0157	-0.1523	0.1103	-0.1086	-0.0698	0.0299	0.0012	-0.0538	-0.2204	0.1086	-0.0615	0.1424	0.4658	0.5116	-0.049	0.0259
BP0215	phosphoenolpyruvate carboxylase	0.1148	-0.014	-0.4357	0.2041	-0.1172	-0.0865	-0.0424	0.5829	0.1184	-0.6592	0.1671	0.2562	0.2741	0.3116	0.1345	-0.1654	0.4037	-0.0155	0.0339	-0.4234	0.2008	-0.023	0.2807	0.6194	0.0509	0.0509	0.2843	0.5064	0.1855	-0.1779	0.357	-0.1149	0.1165	-0.4656	0.1563	0.1723	0.031	0.1979	0.2522	0.6925	0.1409	0.4278	0.4357	-0.0417	-0.0651	-0.5389	-0.0114	0.5191
BP0216	autotransporter subtilisin-like protease	-0.0332	-0.0926	0.1125	0.0419	0.1382	0.1037	0.1288	0.5825	0.6441	-0.1385	-0.0175	0.1736	-0.0521	0.373	0.0838	-0.3144	0.1369	-0.0524	0.0653	-0.586	0.1619	-0.2068	0.0631	0.4857	0.0315	0.0328	0.0032	0.104	0.07	-0.2337	-0.1366	0.535	0.1644	-0.3315	0.2434	-0.0271	0.0954	0.2731	0.0276	0.3492	0.0673	0.404	0.3999	0.1941	0.4864	0.5385	0.2683	0.3003
BP0217	3-hydroxybutyryl-CoA dehydrogenase	-0.47	-0.3715	-0.8249	-0.0587	-0.0975	-0.3597	-0.1548	0.3886	-0.0358	-0.8165	-0.2466	-0.1599	-0.016	0.1644	-0.1621	0.1215	0.2901	-0.2199	-0.102	-0.4409	-0.5201	-0.3638	0.2925	0.4779	-0.291	-0.0436	-0.0353	0.4343	0.551	0.6361	0.8341	0.5271	0.1915	-0.4196	0.0208	-0.076	-0.3617	-0.0049	-0.1839	0.3407	-0.2633	-0.0832	-0.2266	0.3152	0.7214	0.4788	-0.3129	0.4324
BP0218	short-chain fatty acids transporter	-0.2378	-0.6175	-0.4191	-0.1175	-0.0994	-0.1779	-0.1825	0.2982	-0.0265	-0.8099	0.0625	0.0085	-0.0461	-0.0544	0.1646	-0.1617	0.2685	-0.2994	-0.1948	-0.2786	-0.5812	-0.1231	0.3775	0.526	-0.2438	-0.1103	-0.0859	0.2831	0.2443	0.3934	0.6325	0.0688	0.0495	0.0509	0.0445	0.0244	-0.3282	-0.0412	-0.0658	0.3979	-0.0549	-0.0372	-0.248	-0.1037	0.3043	0.2693	-0.4062	0.4226
BP0219	probable short-chain dehydrogenase	-0.3173	-0.2516	-0.2552	-0.1186	-0.2128	-0.4362	-0.6668	0.0291	0.0214	-0.3338	-0.1416	0.0533	0.0414	0.1402	-0.173	-0.1944	-0.0346	0.0291	-0.2311	-0.6641	-0.3958	-0.4698	-0.0837	0.3824	-0.1141	-0.2163	0.0957	0.0831	0.6365	0.516	0.7673	0.4645	0.0785	-0.3051	0.1149	-0.0366	-0.1396	-0.0446	-0.1293	0.0351	-0.2888	0.22	-0.0159	-0.0885	0.5187	0.4316	-0.2679	0.1784
BP0220	probable transcriptional regulator	0.1487	-0.0201	0.3788	-0.2254	0.0046	0.0358	-0.2924	-0.1618	-0.1187	0.242	0.298	0.0658	-0.0959	0.3412	0.015	0.6253	-0.2093	0.4189	0.1494	-0.2713	0.0062	0.0279	0.2622	0.127	0.3203	0.3003	-0.0689	-0.0491	0.1149	0.0387	0.1396	0.8281	0.2364	-0.2011	0.1139	0.014	0.1179	0.2294	0.1207	-0.126	0.2151	0.2027	0.3094	0.2485	0.7928	1.0071	0.407	0.0432
BP0221	3-oxoadipate CoA-transferase subunit A	-0.2633	-0.4817	0.1003	-0.4713	-0.3236	-0.3835	-0.582	-0.2373	-0.3787	-0.9	0.1541	0.0801	0.1577	0.0781	-0.252	-0.2111	0.1214	-0.3455	-0.3795	-0.2068	-0.3546	-0.5387	-0.0111	0.2725	-0.294	0.0355	-0.1945	0.0449	-0.6675	-0.6051	0.2811	0.2667	-0.2566	0.2322	0.2354	-0.2189	-0.1422	0.1084	-0.0912	0.1108	-0.1781	0.1296	-0.1774	0.0367	0.603	0.8508	-0.0574	0.4124
BP0222	3-oxoadipate CoA-transferase subunit B	-0.2187	-0.2553	-0.2451	-0.3371	-0.2463	-0.4871	-0.5232	-0.1829	-0.2732	-0.8052	-0.1629	0.0326	0.0866	0.0134	-0.0941	-0.2655	-0.0534	-0.3531	-0.3886	-0.8197	-0.3924	-0.3446	-0.1416	0.093	-0.3114	-0.2732	-0.0897	0.2181	-0.2502	-0.4991	-0.1604	0.5487	-0.1505	-0.3526	0.1253	0.0182	-0.0706	0.1366	-0.1213	0.1913	-0.2061	0.1294	-0.1852	0.1608	0.7564	0.8416	-0.4716	0.3321
BP0223	methylmuconolactone isomerase	-0.0399	-0.3271	-0.5828	-0.4172	-0.295	-0.5445	-0.496	-0.2733	-0.3044	-0.9522	-0.0119	0.0571	-0.0903	0.0861	-0.0426	-0.5159	-0.0812	-0.3544	-0.2769	-0.8406	-0.382	-0.4922	-0.1027	0.0542	-0.0928	-0.1674	-0.123	-0.0243	-0.0022	-0.3024	0.0247	0.3601	-0.0898	-0.4595	0.1443	-0.1747	-0.2029	-0.1641	-0.2005	-0.1103	-0.2028	0.224	-0.1088	0.0063	0.5712	0.2132	-0.3817	0.0988
BP0224	conserved hypothetical protein	-0.1753	-0.274	-0.5877	-0.198	-0.1707	-0.5666	-0.3431	0.1027	-0.1475	-0.6553	-0.0584	-0.0528	0.1577	0.0348	-0.1392	-0.3272	0.057	-0.2733	-0.2362	-0.9287	-0.271	-0.2132	-0.0513	0.2059	-0.1726	-0.2383	0.0665	0.2957	-0.1476	-0.355	-0.1409	0.3421	-0.003	-0.7221	-0.1079	-0.0427	-0.1001	0.2055	-0.2547	0.3208	-0.298	0.1222	0.1155	0.3086	0.44	0.1301	-0.2554	0.3465
BP0225	3-oxoadipate enol-lactone hydrolase	-0.2988	0.4119	-0.4763	0.3722	-0.0898	-0.3034	0.0126	0.6867	0.1655	-0.2483	0.2413	-0.0125	0.3153	0.2526	-0.0517	-0.244	0.3305	-0.1413	-0.0137	-0.4457	0.0382	-0.1246	0.2352	0.8497	0.1088	0.0084	0.3953	0.6577	-0.1577	0.0868	0.3877	1.0588	0.4242	-0.4979	0.0692	0.2473	0.1157	0.2051	0.1739	1.0182	0.2968	0.2553	0.4976	0.2093	0.2869	0.1835	0.3127	0.7217
BP0226	conserved hypothetical protein	-0.1283	0.0269	0.0784	-0.1199	0.0223	-0.0718	-0.2418	-0.0071	-0.1983	-0.3238	0.1012	0.2073	0.278	0.2675	-0.0505	-0.3824	-0.0303	0.0128	-0.1013	-0.3123	-0.2208	-0.4219	-0.0231	0.2366	-0.1879	-0.2437	0.0066	0.4657	0.0855	-0.2463	0.1604	0.3634	0.1149	-0.0371	-0.2146	0.0051	-0.0704	0.2053	-0.1661	0.1928	0.0784	0.0991	0.1336	0.0401	0.4016	0.5045	-0.1874	0.1099
BP0227	phosphate starvation-inducible protein precursor	-0.2358	-0.1923	-0.2925	-0.0361	-0.2188	0.0095	0.0241	0.3372	0.1611	-0.1384	0.0326	0.3189	0.0219	0.0973	-0.2714	0.298	-0.0811	-0.0164	-0.3019	-0.1915	-0.1331	0.0989	0.1785	0.4201	-0.0373	-0.1762	-0.2882	0.1019	0.12	-0.2273	-0.1757	0.8679	0.019	-0.138	0.1812	-0.3	-0.0428	0.0773	-0.2043	0.2044	0.1249	0.0358	-0.0374	0.4841	0.6853	0.782	-0.3307	0.2689
BP0229	beta-D-hydroxybutyrate dehydrogenase	0.1558	-0.3354	0.4385	-0.1463	0.1849	-0.0133	-0.487	0.8025	0.1817	-0.2923	0.2012	0.534	-0.0769	0.1223	0.2739	-0.1118	0.0572	0.2736	-0.1809	-0.0561	-0.3331	-0.0111	0.0082	0.0996	-0.252	-0.06	-0.0511	-0.0032	0.4177	-0.0628	0.2501	0.3431	0.2229	0.2348	0.1302	0.176	-0.1341	-0.304	0.4873	0.3719	-0.3035	0.6247	0.1486	-0.1635	0.7381	1.0391	-0.1422	0.0091
BP0230	conserved hypothetical protein (Pseudogene)	-0.0004	-0.5118	-0.3726	-0.3556	0.1285	-0.354	-0.4193	-0.0911	0.0739	-0.0996	0.1973	0.2429	0.0003	0.0115	0.4878	-0.1573	-0.2849	-0.2686	-0.181	-0.2999	-0.4119	-0.0308	-0.1558	-0.0647	-0.3486	-0.8456	-0.456	-0.0537	0.2308	-0.2786	-0.0062	0.0864	-0.1405	0.107	-0.138	-0.3309	-0.1495	-0.3247	-0.2757	-0.185	0.0832	0.2316	0.0049	-0.4671	0.7729	0.5238	-0.1637	-0.2041
BP0231	4-carboxymuconolactone decarboxylase	0.0944	-0.2617	-0.9534	-0.8258	-0.1151	-0.7623	-0.4291	-0.4411	-0.4601	-0.2785	0.1875	0.2774	-0.1985	0.0286	0.1585	0.6018	0.1276	-0.8062	-0.6939	-0.1812	-0.2265	-0.6124	-0.2126	-0.1792	-0.2868	-1.3172	-0.8838	-0.3649	0.1109	-0.3334	-0.1776	0.6071	-0.4331	-0.2581	0.1374	-0.4215	-0.5069	-0.4856	-0.6226	-0.6522	-0.484	0.1281	-0.6353	-0.8762	1.4405	1.1078	-0.7232	-0.6718
BP0232	probable oxidoreductase (Pseudogene)	0.2852	-0.55	-0.811	-0.7261	-0.0716	0.0643	-0.2513	-0.5277	-0.2538	-0.2031	0.5284	0.3758	0.0088	0.303	0.8788	-0.0366	0.4191	-0.7969	-0.1034	-0.3802	-0.361	-0.2017	-0.0053	0.1314	-0.187	-0.1076	-0.7257	0.0756	0.5566	-0.6367	0.0137	0.2506	-0.5298	0.0144	0.3195	0.0644	-0.255	-0.4199	-1.0508	-0.9835	-0.9817	0.5934	-0.3722	-0.0743	0.8574	0.7877	-0.3907	-0.1625
BP0233	GntR family transcriptional regulator	0.2337	0.3079	0.0986	0.2111	0.1502	-0.1946	-0.1279	0.2048	0.0591	-0.1801	0.2298	0.2641	0.3105	0.4301	0.1852	-0.2874	0.3447	0.3018	0.2884	-0.2477	0.1357	0.0062	0.3066	0.6613	0.2118	0.1266	0.2322	0.4756	-0.1022	0.0506	0.1202	0.5776	0.3743	0.0368	0.413	0.1899	0.148	0.2406	0.192	0.548	0.3209	0.376	0.3845	0.2751	0.6264	0.3323	0.0449	0.5564
BP0234	putative solute-binding periplasmic protein	0.0879	0.0617	-0.0647	0.3173	0.0363	-0.2403	-0.3063	0.4338	0.1215	-0.5752	0.0957	0.2151	0.1964	0.2027	0.1489	0.1635	0.4765	0.464	-0.0164	-0.4036	0.0516	0.0441	0.5535	0.7791	0.0333	-0.0078	0.3621	0.7116	0.1516	-0.2886	0.2469	0.531	0.2229	-0.2437	0.1027	-0.0398	0.0138	0.2532	0.28	0.7819	0.3183	0.3045	0.493	0.3577	0.5124	0.448	-0.1698	0.7869
BP0235	putative membrane protein	0.3249	-0.9852	-1.1232	-1.3601	-0.191	-0.7186	-1.1002	-1.4727	-0.6885	-0.6774	-0.0767	0.7558	-0.0749	-0.1314	0.5995	0.0965	-0.4132	-0.7662	-0.8107	-0.5745	-0.7212	-0.7874	-0.8384	-0.7102	-0.5806	-1.1397	-0.9931	-0.9076	0.149	-0.4873	0.249	-0.1467	-0.6008	0.0295	0.6037	-0.3287	-0.7521	-0.7865	-1.4536	-1.3004	-1.0321	0.5452	-0.5224	-0.8232	0.8905	1.3656	-0.7566	-1.2548
BP0236	conserved hypothetical protein (Pseudogene)	0.0287	0.0438	0.4832	-0.2002	-0.0705	0.0977	-0.144	-0.2433	-0.0255	-0.2218	0.1455	0.2603	0.1929	0.2358	0.178	0.2038	-0.0528	0.5157	0.1226	0.235	0.0449	-0.0981	0.1518	0.2375	0.1041	-0.0075	0.4179	0.3464	-0.0217	0.0239	0.3265	0.4325	0.0531	0.1937	0.386	0.0677	0.1415	0.2973	0.1769	0.1503	0.1418	0.1901	0.0864	0.433	0.6476	0.6473	-0.0831	0.267
BP0237	putative exported protein	0.4574	-0.4088	-0.2028	-0.1093	0.0801	-0.157	-0.1799	0.3367	-0.2497	-0.1817	0.286	0.1587	0.2143	0.173	0.2691	0.4447	0.2635	-0.0003	0.2638	-0.1422	-0.0989	-0.0743	0.4749	0.4342	-0.1996	0.0899	0.1227	0.0636	0.0602	-0.1746	0.2237	0.4291	-0.119	0.0174	0.3632	0.1993	0.2275	0.0456	-0.0864	0.3003	0.3402	0.485	0.1847	0.211	0.618	0.5728	-0.0712	0.0946
BP0238	2-amino-4-hydroxy-6-hydroxymethyldihydropteridi ne pyrophosphokinase	0.2631	-0.0293	0.0997	-0.0682	0.0459	0.0481	-0.5544	0.0194	-0.0334	-0.5595	0.4778	0.2181	0.2453	0.1704	0.2808	0.077	0.3116	0.0418	0.0335	-0.1316	-0.1719	-0.2267	0.5033	0.4636	0.087	0.061	0.372	0.1804	0.2628	-0.1159	0.6282	0.2653	-0.0197	0.1251	0.374	-0.0046	0.0285	0.1811	0.2923	0.2849	-0.2241	0.2024	0.0761	0.2993	0.4683	0.2698	0.2181	0.3772
BP0239	poly(A) polymerase	-0.0628	0.1493	-0.0094	0.127	-0.0405	-0.0534	-0.4193	0.2416	0.1396	-0.2437	0.0758	0.3155	0.18	0.3572	0.3343	0.4504	0.2228	0.2339	0.1726	-0.0488	0.039	0.18	0.3559	0.6388	0.1364	0.0667	0.1599	0.472	0.3035	0.0582	0.0604	0.1845	0.3835	0.1328	0.2119	0.1729	0.2084	0.1505	0.1159	0.4326	0.2745	0.4158	0.4596	0.0449	0.6227	0.479	0.0725	0.5048
BP0240	conserved hypothetical protein	0.0502	-0.0414	0.296	0.1286	0.06	-0.0871	-0.2293	-0.0103	0.034	-0.264	0.2252	0.2389	0.304	0.2208	0.1937	-0.1002	0.203	0.3285	0.1491	0.3035	0.0919	0.0521	0.2148	0.5528	0.2078	0.289	0.3047	0.5779	0.1988	0.1383	0.1059	0.1427	0.2984	0.2522	0.1967	0.0385	0.2304	0.2753	0.1453	0.5802	0.0853	0.3855	0.2934	0.181	0.5239	0.4867	-0.0273	0.4576
BP0241	conserved hypothetical protein	0.3399	-0.08	-0.0157	0.1977	0.0932	-0.2113	-0.2511	0.3589	0.1542	-0.1759	0.2057	0.3903	0.0372	0.5362	0.3925	0.0196	0.4788	0.3157	0.1868	-0.4774	0.2107	-0.2061	0.1794	0.7851	0.3499	0.366	0.5139	0.5243	0.4965	-0.0231	0.2941	-0.0605	0.2003	-0.3136	0.4662	0.0687	0.1792	0.2909	0.0895	0.6442	0.1114	0.5717	0.3246	-0.0218	0.2636	0.0005	0.1898	0.5996
BP0242	phosphoribosylformylglycinamidine cyclo-ligase	0.1235	-0.1196	0.7965	-0.4843	0.0886	-0.1553	-0.311	-0.7131	-0.217	0.5081	0.2099	0.2395	0.1926	0.3504	0.1733	0.1126	-0.4	0.4381	0.0062	-0.3267	0.1385	-0.1829	-0.4074	-0.0379	0.1418	-0.0327	0.2391	-0.2277	0.5731	0.3157	0.1324	0.638	0.2157	0.0295	0.4067	-0.05	0.2609	0.248	0.0868	-0.2365	-0.0828	0.46	0.2226	0.3617	0.7682	1.3358	0.4504	-0.2028
BP0243	tRNA delta(2)-isopentenylpyrophosphate transferase	0.2946	0.3056	0.6784	-0.3739	0.0793	-0.2379	-0.2332	-0.5744	-0.3068	-0.0057	0.2282	0.3393	0.2292	0.1867	0.0682	-0.0046	-0.2209	0.4817	0.0081	-0.1673	0.2016	0.0381	-0.2958	0.2186	0.1516	0.2155	0.4904	-0.0467	0.3368	0.0506	0.5164	0.5968	0.3734	0.1413	0.5373	0.1358	0.1365	0.0225	-0.0258	-0.0796	-0.1332	0.4142	0.3759	0.1395	0.7152	1.0399	0.4345	0.066
BP0244	DNA mismatch repair protein	-0.0068	0.0044	-0.2628	0.2596	0.1211	-0.5203	-0.348	0.2837	0.1878	-0.108	0.1893	0.2858	0.0884	0.2073	0.1948	0.0883	0.4992	0.1549	0.3069	-0.2418	0.0487	-0.0207	0.2718	0.6344	0.2783	0.1485	0.326	0.6103	0.4486	0.2445	0.4428	0.671	0.3647	0.1036	0.1945	0.1335	-0.0218	0.0672	0.0414	0.6263	0.239	0.4108	0.3333	0.2483	0.5595	0.4953	0.3382	0.5933
BP0245	putative membrane protein	0.2296	0.1121	-0.2112	0.1674	0.0021	-0.4587	-0.3983	-0.0817	-0.2209	-0.0673	-0.0114	0.1602	0.0466	0.2463	0.1998	-0.7152	0.1019	0.0827	-0.0817	-0.0444	0.0865	0.1837	0.4804	0.3976	0.1868	0.1602	0.1611	0.348	0.026	-0.3074	0.2729	0.3413	0.021	-0.0511	0.1424	-0.0485	0.2122	0.1581	-0.007	0.275	0.2311	0.2763	0.1045	0.3646	0.5947	0.4463	0.3357	0.1547
BP0246	N-acetylmuramoyl-L-alanine amidase	0.1164	-0.0158	0.3413	-0.4758	-0.1628	-1.0988	-0.909	-1.3283	-1.1769	0.1512	0.0617	0.2625	0.1019	0.0727	-0.3482	-0.5238	-0.5094	-0.1372	-0.3724	-1.1596	-0.3169	-0.683	-0.9204	-0.2591	-0.1049	-0.3546	0.0287	-0.7299	0.6551	0.2619	0.4454	0.4883	-0.1088	-0.5105	0.2095	-0.5131	-0.2874	-0.1862	-0.3005	-0.6359	-0.6506	0.021	-0.269	-0.1696	0.5881	0.699	0.0641	-0.4733
BP0247	conserved hypothetical protein	-0.1466	0.3624	-0.2543	0.2476	0.2504	-0.2791	-0.1289	0.4985	0.1152	-0.2582	0.0497	0.0415	0.0935	0.3771	0.202	-0.0116	0.5777	0.3224	0.3044	0.8246	0.2664	0.6217	1.4763	0.8525	0.2465	0.3859	0.2137	0.8346	-0.1808	0.1654	0.1757	-0.1848	0.413	0.7489	0.0618	0.047	0.4304	0.6612	0.4434	0.8048	0.7349	0.0384	0.3918	0.4413	-0.2461	-0.2655	0.0929	0.8646
BP0248	fumarate hydratase class II	-0.0838	-0.0259	-0.0325	-0.1873	-0.0547	-0.2928	-0.2938	-0.2528	-0.4754	-0.5484	0.1174	0.0307	0.2501	-0.1627	-0.1072	0.4019	0.2114	-0.2423	-0.4014	-0.5782	-0.2493	-0.2504	0.1121	0.288	-0.3925	-0.1933	0.004	0.2573	-0.2189	-0.4094	0.0476	0.4445	-0.2865	-0.3749	-0.0606	-0.2326	0.0727	0.0297	-0.0464	0.2122	0.097	-0.0091	-0.0342	0.2134	0.7741	0.7629	-0.1229	0.1115
BP0249	putative membrane protein	0.2059	-0.2857	-0.4862	0.1517	0.233	-0.1063	-0.2175	0.344	0.2694	0.0515	0.6565	0.459	-0.0599	0.2235	0.6845	-0.1558	0.3951	-0.1613	0.1325	0.7676	-0.2828	0.0117	0.4632	0.3087	-0.1448	-0.216	-0.1665	0.5021	0.3415	-0.1635	0.0397	0.0888	0.3516	0.7118	0.3319	0.2115	-0.1184	0.0807	0.2234	0.4301	0.0692	0.3369	0.2007	-0.2001	0.7712	0.3522	0.2304	0.2572
BP0250	putative exported protein	-0.0301	0.0244	-0.3186	0.1548	-0.2004	0.0451	0.1351	0.7259	0.3463	-0.2935	-0.1174	-0.0339	0.2897	0.144	0.0961	-0.0001	0.2046	-0.1551	-0.0157	-0.526	-0.0006	-0.1186	-0.1129	0.2989	-0.1002	-0.0808	0.2144	0.4093	-0.1562	-0.2378	0.2497	-0.1528	0.0226	-0.3413	-0.043	0.1008	-0.0478	0.1523	0.0968	0.5839	0.2203	-0.0161	0.1696	-0.2068	-0.071	-0.2049	0.1643	0.4645
BP0251	LysR family transcriptional regulator	-0.0857	-0.0039	0.2491	0.3262	0.2793	-0.3161	-0.2174	0.482	0.4951	-0.4476	0.1945	0.4801	0.2861	0.3961	-0.1431	0.2234	0.5652	0.3735	0.2481	-0.2358	0.5533	0.4313	0.1679	0.6916	0.7926	0.2396	0.4401	0.6896	0.42	0.118	0.3271	0.3276	0.0532	0.0548	0.4111	0.3315	0.16	0.1161	0.025	0.6847	0.3619	0.3615	0.4077	0.3642	0.2105	0.2186	-0.3108	0.8667
BP0252	gamma-glutamyltranspeptidase	-0.2062	-0.0531	0.1994	0.0987	-0.1216	0.1051	-0.1768	0.2731	0.2729	0.0481	0.055	0.238	0.0423	0.4032	0.1787	-0.4331	0.0128	0.2111	0.0271	-0.1743	0.1354	0.2052	0.1054	0.3956	0.2353	0.281	0.2715	0.1174	0.2257	0.0239	0.0555	0.5884	0.3182	0.2467	0.4579	0.1046	0.1349	0.2859	0.3198	0.3998	0.1383	0.4146	0.3478	0.055	0.6205	0.5781	0.2993	0.3045
BP0253	conserved hypothetical protein	0.215	-0.1762	0.0687	-0.3199	-0.1423	-0.5806	-0.9188	-0.0953	0.2878	-0.3394	0.1357	0.4656	0.1255	0.1389	0.1941	-0.1292	-0.0998	0.1156	-0.277	-0.7723	-0.2766	-0.0838	-0.2173	0.1461	0.1236	-0.3721	0.044	-0.1053	0.54	-0.2183	0.1072	0.1608	0.2848	-0.2353	0.4271	-0.3044	-0.2495	-0.3578	-0.2047	-0.0599	0.0046	0.2315	0.1583	-0.2867	0.6955	0.5935	-0.291	0.1111
BP0254	putative exported protein	0.362	-0.2178	-0.5167	-0.3067	-0.1518	-0.3857	-0.8197	-0.2979	-0.5902	-0.2622	0.2082	0.2021	-0.0671	0.101	0.3321	-0.3133	0.025	-0.0994	-0.2593	-0.6529	-0.3136	-0.2776	-0.0841	0.1267	-0.1003	-0.4701	-0.2323	-0.7046	-0.1661	-0.4617	0.0243	0.4225	-0.1534	-0.4077	0.1035	-0.0728	-0.2002	-0.0731	-0.2193	-0.1657	-0.1504	0.1544	-0.1792	-0.0375	0.9483	0.7735	-0.1064	-0.1448
BP0255	C-terminal region of a putative oxidoreductase (Pseudogene)	0.0025	0.0048	0.0093	-0.1767	-0.0799	-0.0506	-0.4744	-0.1984	-0.206	-0.5998	0.1406	0.3891	0.1437	-0.0802	-0.1883	-0.0806	-0.1193	-0.2325	-0.5264	-0.5337	-0.2457	-0.1923	0.1053	0.2182	-0.0383	-0.3448	-0.0839	-0.2336	0.3813	-0.0512	0.2221	0.4237	-0.4509	-0.4064	-0.3158	-0.253	0.0195	0.0134	-0.5054	-0.3157	-0.257	0.0573	-0.0344	0.3092	0.7873	0.9366	-0.5049	-0.1841
BP0257	C-terminal region of TonB dependent receptor protein (Pseudogene)	-0.206	-0.2764	0.0564	-0.4295	-0.1522	-0.6213	-1.4622	-0.8305	-0.4857	-0.3832	-0.0366	0.1413	-0.3486	0.1557	0.4477	0.0535	0.0387	-0.1373	-0.4836	-0.5868	-0.1774	-0.6968	-0.2131	0.3664	-0.0328	-0.2135	-0.2169	-0.7692	0.2479	-0.0881	-0.2708	0.825	0.2595	-0.0817	0.431	-0.3329	-0.1121	-0.3814	-0.8356	-0.3308	-0.2877	0.4437	-0.0986	-0.057	0.8951	0.6397	-0.723	-0.1091
BP0258	conserved hypothetical protein	-1.1853	-1.8	-2.0591	-1.3628	-1.2153	-1.5821	-2.0109	0.5906	0.4115	-1.0977	-0.5012	-0.4078	-0.1116	-1.1511	-0.2051	-0.4516	0.0909	-1.3765	-1.814	-1.0913	-1.1578	-0.6086	1.1661	1.488	-1.8975	-1.5944	0.0632	0.3432	-1.1629	-0.329	0.49	1.2663	-0.872	-1.1248	-1.206	-0.5623	-0.9688	-1.3914	-1.2038	-0.8031	-0.4162	-0.9419	-0.4044	1.0189	1.6248	1.3829	-1.058	-0.7585
BP0259	cytochrome D ubiquinol oxidase subunit I	-0.3528	-0.5691	-0.2698	-1.1126	-0.4686	-0.9983	-1.302	-0.0464	0.0938	-0.3837	-0.1769	-0.2236	-0.0257	-0.2152	-0.2793	0.131	-0.529	-0.1714	-0.8709	-0.5317	-0.3484	-0.4461	0.1788	0.543	-0.8467	-0.8012	-0.0536	-0.365	-0.6396	-0.518	-0.072	0.6223	-0.2183	-0.3366	-0.2736	-0.4371	-0.347	-0.1829	-0.2388	-0.3378	-0.2256	-0.07	-0.0121	0.9972	0.9656	1.3147	0.0641	-0.4743
BP0260	cytochrome D ubiquinol oxidase subunit II	-0.4411	-1.0065	-0.4824	-0.7131	-0.2504	-0.7702	-0.8951	0.517	0.5647	-0.2803	-0.1096	0.0419	-0.1405	0.0687	-0.403	-0.077	-0.2648	0.0509	-0.5817	0.0565	-0.0639	-0.1282	0.7871	0.7777	-0.4622	-0.4647	-0.0662	-0.0634	-0.5984	-0.5705	-0.127	-0.133	0.0744	0.1836	-0.001	0.0231	-0.192	-0.0485	0.1292	0.2082	0.2234	-0.0241	0.3033	0.6466	0.7328	0.8616	0.1784	0.0346
BP0261	putative exported protein	-0.104	-0.2414	0.0877	-0.7418	-0.0214	-0.5955	-0.7082	0.121	0.5031	-0.0073	0.0304	0.0585	-0.1601	0.1432	-0.3858	0.735	-0.6382	0.4035	-0.4358	0.1657	-0.1687	-0.3972	0.3019	0.7936	-0.3905	-0.5956	-0.1589	-0.2429	-0.1195	-0.1317	0.1446	0.4556	0.0582	0.129	-0.0935	-0.0403	-0.057	-0.1555	0.0097	-0.1929	-0.0345	0.1279	0.2929	0.549	0.7789	0.9404	0.2463	-0.313
BP0262	probable ATP-binding component of ABC transporter	0.135	-0.1902	0.3903	-0.5523	0.113	-0.5417	-0.4056	0.0389	0.6245	-0.0998	0.373	0.324	0.0452	0.1473	0.0392	1.1602	-0.1469	0.4141	-0.2475	0.3736	0.0044	-0.1049	0.7827	0.796	-0.0348	0.0505	0.3166	-0.1433	0.0334	-0.3447	0.3891	0.3174	-0.0382	0.5125	0.2705	-0.0681	0.2931	0.157	0.2961	-0.0224	-0.0668	0.4065	0.5355	0.3609	0.7242	1.1125	0.3843	0.0409
BP0263	probable ATP-binding component of ABC transporter	0.1886	0.0181	0.9476	-0.4825	0.1728	0.1559	0.0842	-0.2192	0.1704	-0.4148	0.7835	0.3181	0.2756	0.2907	0.1131	0.4346	-0.0655	0.189	-0.0939	0.9152	0.0977	0.0702	0.7473	0.4111	0.0821	0.5484	0.3429	-0.0392	0.0011	-0.2104	0.8469	0.5174	-0.1114	0.5455	0.48	0.0414	0.1513	0.2427	0.3014	-0.1268	0.1087	0.3735	0.2923	0.4768	0.6711	1.2604	0.3204	0.0118
BP0264	adenine phosphoribosyltransferase	0.1572	0.0317	0.3836	-0.2349	0.0458	0.0054	-0.0642	0.0278	0.0144	-0.2939	0.1014	0.0121	-0.0946	0.4048	0.2749	0.2378	0.1668	0.3921	-0.019	0.2346	0.2555	0.1648	0.4255	0.3553	0.273	0.1783	0.1485	0.1822	0.0656	-0.3337	-0.1823	-0.2353	-0.137	0.2345	0.2164	-0.0035	0.4445	0.3095	-0.0358	0.0035	0.2543	0.5661	0.1724	0.2047	0.1184	0.6711	0.145	0.003
BP0265	probable LysR-family transcriptional regulator (Pseudogene)	0.298	0.0731	-0.0238	-0.0408	-0.0585	-0.2441	-0.2384	0.1358	-0.002	-0.2147	0.3288	0.1859	0.1248	0.4005	0.2788	-0.8849	0.1407	0.2569	0.1384	-0.1288	0.0292	-0.2721	0.1323	0.4079	0.0225	0.0762	0.3429	0.2626	-0.1032	-0.4025	-0.0594	0.1698	0.0836	0.0178	0.2936	0.114	0.0171	0.0598	0.0481	0.305	0.2066	0.3793	0.3143	0.1867	0.64	0.4089	0.2371	0.202
BP0266	putative exported protein	0.0882	-0.4102	-0.6383	-0.2203	-0.1739	-0.6377	-0.7897	-0.0079	-0.188	-0.8172	-0.224	0.0389	-0.3249	-0.0087	-0.0607	0.2372	-0.0818	-0.3511	-0.5782	-1.1473	-0.2032	-0.3928	-0.0004	-0.0161	-0.3461	-0.4005	-0.1965	-0.2155	0.0773	-0.8486	-0.2869	0.3705	-0.6384	-0.842	-0.186	-0.364	-0.302	-0.4872	-0.5033	-0.1035	-0.2499	-0.0438	-0.1701	-0.1101	1.0282	0.849	-0.6755	-0.2036
BP0267	N-terminal region of an outer membrane porin (Pseudogene)	-0.0805	0.4954	0.5129	-0.1007	-0.068	-0.1295	0.1605	-0.1299	0.0865	0.0655	0.3881	0.3613	0.3758	-0.0337	-0.115	-0.0956	-0.1373	-0.026	0.0498	0.1518	0.0253	0.0557	0.1847	0.2555	-0.0699	0.0288	0.2771	0.3267	-0.1292	0.4178	0.4159	0.3977	-0.0264	0.1083	-0.0522	-0.0577	0.0685	0.4322	0.1721	0.123	0.0373	0.0499	0.1862	0.3231	0.5374	0.6304	0.2904	0.4192
BP0270	hypothetical protein	-0.1057	0.1743	0.103	-0.1186	-0.0437	-0.3972	-0.207	0.4798	-0.0111	-0.0781	-0.0395	0.1822	0.1782	0.3207	-0.3534	-0.2587	-0.3335	0.0439	-0.1041	-0.1643	0.0039	-0.1111	-0.1477	0.3469	0.0727	-0.0219	0.1064	0.0759	0.1217	-0.0136	0.0167	0.4714	-0.0021	-0.0993	-0.0044	-0.0413	0.0376	0.2624	-0.1634	0.0496	-0.1468	0.1112	0.3267	0.3329	0.8054	0.6991	-0.0407	0.115
BP0271	hypothetical protein	-0.0181	-0.138	0.1457	-0.5517	0.0488	-0.221	-0.1995	-0.5362	-0.4142	-0.4053	0.1792	0.0721	0.0275	0.0225	-0.1042	0.1289	-0.2814	-0.0203	-0.2047	-0.4995	-0.156	-0.383	-0.2975	-0.0979	-0.0104	-0.3587	-0.0112	-0.2197	0.117	0.1437	0.1367	0.4813	-0.116	-0.2347	-0.014	-0.0805	-0.1486	-0.0237	-0.1968	-0.3661	-0.1979	0.059	-0.2302	0.2032	0.7092	0.84	-0.3141	-0.33
BP0272	integrase (remnant)	0.051	0.1952	0.2195	-0.3324	0.0293	-0.1403	-0.1907	-0.1457	-0.0957	-0.0251	0.2124	0.3143	0.2047	0.1165	-0.0493	-0.847	-0.2618	0.2637	0.0206	-0.0179	-0.2319	-0.1564	0.0696	0.267	0.0656	0.0894	0.2555	0.016	0.2624	0.0666	0.3109	0.4621	-0.1148	-0.2208	-0.111	-0.3258	0.1113	0.1645	-0.0018	-0.0867	0.0702	-0.0175	0.1554	0.1929	0.6388	0.6705	0.2572	0.0095
BP0273	stringent starvation protein B	-0.2638	0.15	-0.541	-0.0013	-0.0601	-0.3473	-0.1191	0.3469	-0.0782	-0.1198	0.1285	0.1023	0.3283	0.2514	0.1049	0.2938	0.2526	0.0743	0.0848	-1.0126	-0.1754	0.1018	0.3588	0.562	0.0325	-0.579	0.2274	0.431	-0.5422	-0.1511	-0.2376	-0.1549	0.1318	-0.6741	-0.2773	0.0379	0.1821	0.2949	0.3834	0.5284	0.5532	0.0835	0.2628	0.2655	0.1783	-0.1257	0.1831	0.6651
BP0274	stringent starvation protein A	-0.1646	0.2577	-0.3553	0.1348	0.1481	-0.033	-0.0742	0.4484	0.0173	-0.3778	0.228	0.2441	0.5072	0.301	0.2398	0.2755	0.4046	0.0744	0.4532	0.5251	-0.0031	0.2268	0.5233	0.7611	0.0323	0.0017	0.0408	0.5696	-0.4372	-0.0412	-0.1462	-0.4315	0.3648	0.2222	0.074	0.2756	0.1952	0.5042	0.3635	0.7816	0.6016	0.4151	0.2586	0.3159	-0.0174	-0.3107	0.1027	0.8768
BP0275	cytochrome C1 precursor	-0.2256	0.1511	0.1822	0.1707	0.2421	-0.0816	-0.2386	0.2193	0.2331	-0.3535	0.1546	0.6123	0.462	0.3184	0.1741	0.1785	0.3773	0.1995	0.1846	0.0792	0.0827	-0.0736	0.163	0.6746	0.1594	0.1993	0.3486	0.4443	0.4757	0.2052	0.3241	0.4161	0.0869	0.0276	0.3204	0.2494	0.0954	0.3146	0.2066	0.5411	0.1554	0.3345	0.2873	0.3749	0.6792	0.6428	-0.1474	0.6435
BP0276	cytochrome B	-0.024	-0.2246	-0.1719	-0.139	0.0173	-0.3444	0.1505	0.0332	-0.1642	-0.1814	0.2271	0.0626	0.311	-0.0462	0.1072	-0.0212	-0.144	0.0593	-0.1775	0.4808	-0.3174	-0.1688	-0.0411	0.1695	-0.328	-0.47	-0.2573	0.0276	-0.259	-0.0858	0.1835	-0.0906	-0.0328	0.2465	-0.2074	0.1758	-0.004	0.3345	0.1008	0.2652	-0.0126	0.1111	-0.189	0.2479	0.1898	0.21	0.1299	0.344
BP0277	ubiquinol-cytochrome C reductase iron-sulfur subunit	-0.08	-0.0403	0.0502	0.0101	-0.0186	-0.5061	-0.2963	0.1153	-0.1945	-0.3368	0.2337	0.1571	0.2563	0.1347	0.0865	0.3736	0.147	-0.0107	-0.012	-0.3471	-0.3261	-0.4602	-0.2166	0.3951	-0.1824	-0.2562	0.0311	0.2844	0.242	0.3347	0.2656	0.3775	0.0659	-0.0634	-0.0569	0.0312	-0.059	0.1397	0.1003	0.3291	-0.167	0.1207	0.0558	0.1294	0.3671	0.2764	0.1687	0.4371
BP0278	large-conductance mechanosensitive channel	0.0536	0.0073	-0.0014	0.1796	-0.0231	-0.1214	-0.0793	0.016	-0.1691	-0.0585	0.1855	0.2368	0.2035	0.2394	0.1025	-0.4652	0.1259	0.1838	0.2229	0.5571	-0.1477	-0.0162	0.5111	0.3063	0.0261	0.0702	0.0043	0.2749	-0.2063	-0.0305	0.0566	-0.1612	0.2999	0.2722	0.1016	0.1861	0.0792	0.2094	-0.0184	0.3801	0.1065	0.0233	-0.0824	0.0675	0.3101	0.1904	0.2702	0.4197
BP0279	conserved hypothetical protein	0.0553	0.1888	0.4209	-0.039	-0.0233	-0.2874	-0.3731	-0.3094	-0.3059	-0.2739	0.1729	0.1048	0.2701	0.1014	-0.0275	1.3871	-0.149	0.1949	-0.4031	-0.5767	-0.1956	0.0537	0.0853	0.0961	-0.0406	-0.186	-0.177	-0.1436	0.1455	0.0595	0.1879	0.0211	-0.3229	-0.4245	-0.1425	-0.2371	-0.0176	0.0577	0.1753	0.043	-0.1873	0.0107	-0.1955	0.209	0.279	0.6997	-0.182	0.0976
BP0280	protease	0.0988	0.0392	1.4837	-0.7322	0.1163	0.2757	-0.008	-0.8107	-0.5115	-0.6899	0.7544	0.2961	0.3573	0.203	0.186	0.401	-0.3797	0.012	-0.3209	0.7445	-0.2124	-0.2874	0.2291	-0.1292	0.1479	0.7797	0.1235	-0.3875	-0.0101	-0.2758	1.1129	0.2433	-0.3961	0.5476	0.5739	-0.3226	0.148	0.2482	0.2633	-0.4599	-0.1605	0.2259	-0.3651	0.0001	0.378	1.2815	0.2179	-0.415
BP0282	putative regulatory protein	-0.0115	-0.2652	0.0887	-0.2882	0.0302	0.1414	0.1633	-0.2648	-0.4578	-0.3757	0.5146	0.1896	0.2216	0.1447	0.3197	0.2717	0.0674	-0.2328	-0.2876	-0.0435	-0.4611	-0.1911	0.4238	0.3449	-0.1467	-0.2617	-0.0593	-0.0917	-0.2816	-0.2542	0.2741	0.1309	0.0334	0.0962	0.1709	-0.136	0.1987	0.0917	-0.0925	-0.083	0.1044	0.0942	-0.2909	0.1753	0.5176	0.6281	-0.1802	0.0968
BP0283	putative 2-hydroxyacid dehydrogenase	0.1187	-0.1295	0.0052	-0.0613	-0.052	-0.3039	-0.2721	0.1475	0.2011	-0.3505	0.3282	0.2431	0.2628	0.2784	0.4	0.058	0.3303	-0.2534	0.0164	-0.0363	0.1523	-0.0894	0.3	0.7939	0.0924	0.5873	0.185	0.2679	0.2097	0.0053	0.3703	0.7574	-0.1024	0.1614	0.4721	0.1148	-0.3284	-0.3001	-0.2185	0.2195	0.2582	0.3448	0.4911	0.051	0.5002	0.5089	-0.233	0.2755
BP0284	probable extracellular solute-binding protein, family 5	0.0358	-0.7059	-0.4722	-0.6376	-0.0858	-0.7054	-0.7738	-0.5979	-0.4991	-0.0378	0.1449	0.2875	-0.2474	0.0645	0.6113	1.4378	-0.2217	-0.4061	-0.1156	-0.4296	-0.364	-0.4914	-0.0809	-0.0567	-0.5873	-0.6826	-0.7321	-0.645	0.2773	-0.2141	-0.2534	0.0315	-0.4858	-0.1184	0.1297	-0.1956	-0.2907	-0.5989	0.1086	0.0051	-0.7273	0.4856	-0.4923	-0.6069	0.717	0.9601	-0.1442	-0.4613
BP0285	putative acetyl esterase	0.2052	0.043	0.7068	-0.4672	-0.3772	-0.0676	-0.0222	-0.2057	-0.4506	-1.3773	1.2072	0.1624	0.6953	-0.0101	0.0758	-0.1457	0.0766	-0.2921	-0.3967	0.9003	-0.4004	-0.355	0.5405	0.3294	-0.2212	0.6757	0.0563	-0.0802	-0.2134	-0.1069	1.4759	0.1812	-0.2457	0.5889	0.3762	-0.2549	-0.1136	0.2347	0.3251	0.1515	0.0255	-0.1259	-0.5098	0.2589	0.2977	0.7499	-0.0512	0.2789
BP0286	probable transcriptional regulator	0.1634	-0.1744	0.129	-0.4411	-0.1863	0.0635	0.1075	0.4245	0.5898	0.0645	0.12	0.236	-0.1487	0.2782	-0.0521	0.3201	-0.3551	0.3207	-0.1833	-0.3231	-0.0213	-0.5271	0.0373	0.1911	-0.0262	0.0295	0.0206	0.0007	0.1289	0.2399	0.2954	0.2671	0.009	-0.1629	0.1137	-0.2507	0.0027	0.2191	-0.0973	0.1543	-0.1702	0.2681	-0.0167	0.0181	0.6449	0.7714	0.0522	-0.076
BP0287	2-isopropylmalate synthase	0.1872	0.0867	-0.2839	0.0537	-0.1063	-0.8144	-0.871	-0.0631	-0.2375	-0.6415	0.1849	0.0639	0.0878	0.0953	-0.2614	-0.1801	0.149	-0.0777	-0.1453	-0.2549	-0.017	0.3058	0.316	0.4299	0.0416	0.0103	0.1198	0.3668	-0.0771	-0.4884	0.4062	0.1829	0.0084	-0.2257	0.0361	-0.0994	0.0916	0.0506	-0.0103	0.2642	0.3411	0.2371	-0.1196	0.1703	0.4403	0.4966	-0.2394	0.2979
BP0288	probable transcriptional regulator	0.2533	-0.0484	-0.3172	-0.2386	0.1857	-0.7477	-0.8598	-0.3435	-0.1408	-0.4532	-0.2275	0.0507	-0.2103	0.2435	-0.2473	0.0251	0.0204	-0.1429	-0.2161	-0.6098	0.0067	-0.2061	-0.0447	0.2617	0.2274	0.1332	0.0941	0.1462	-0.1757	-0.4114	-0.1479	0.5925	-0.1762	-0.3606	0.192	-0.2117	-0.1578	-0.0332	-0.1587	0.0731	0.0788	0.0176	-0.0727	0.1107	0.7943	0.5471	-0.3363	0.1483
BP0289	dihydroxy-acid dehydratase	0.1001	-0.1471	0.2211	-0.3802	-0.1702	-0.0524	-0.2213	-0.4664	-0.2409	-0.1485	0.0477	0.191	0.0705	0.1176	-0.0527	0.256	-0.2564	-0.1467	-0.1849	-0.3415	-0.1738	-0.3299	-0.2756	0.1052	-0.0379	-0.1421	-0.0678	-0.0329	0.2383	-0.0396	0.3205	0.0274	-0.3605	-0.305	0.0332	-0.1068	0.0412	-0.0246	0.0678	-0.1386	-0.2731	0.186	-0.0456	-0.1308	0.3937	0.4172	-0.1762	-0.0546
BP0290	probable transporter	0.7493	-0.7912	-1.1501	-1.0065	-0.5404	-0.9085	-1.943	-1.379	-1.2153	-0.2728	0.1437	0.4491	-0.4094	0.1034	0.7711	0.1097	-0.0073	-0.5508	-0.5271	-0.5422	-0.783	-0.8776	-0.0795	-0.1589	-0.3492	-0.5837	-0.826	-0.6275	0.2601	-0.8389	-0.5405	-0.0704	-0.2224	-0.1231	0.1437	-0.1728	-0.4788	-0.7918	-0.9421	-0.5482	-0.9997	0.572	-0.2998	-0.8173	0.8901	0.4851	-0.3994	-0.5962
BP0291	probable LysR-family transcriptional regulator	-0.3103	-0.1549	-0.1567	0.1628	-0.0252	-0.3779	-0.4871	0.1796	0.0044	-0.3719	0.0715	0.3446	0.295	0.3141	0.2065	0.1924	0.3649	0.1037	0.1261	-0.313	0.0707	0.0113	0.2947	0.6408	0.2644	0.3152	0.2951	0.483	0.3347	0.0545	0.2827	0.2875	0.1369	-0.149	0.2073	-0.0137	-0.0112	0.1055	0.0942	0.6899	0.1515	0.228	0.3018	0.0041	0.5641	0.3118	0.2287	0.4574
BP0292	conserved hypothetical protein (Pseudogene)	0.1402	-0.1068	-0.231	-0.1037	-0.1647	-0.1154	-0.3769	0.1104	-0.0195	-0.0196	0.2993	0.2444	0.0244	0.0731	0.4326	0.1586	0.1877	-0.2566	0.0747	-0.1262	-0.0298	-0.144	0.2626	0.3792	-0.1527	-0.1563	-0.1668	0.1501	-0.0381	-0.213	-0.0157	0.5696	-0.1211	-0.1625	-0.0921	-0.0977	-0.0562	-0.0185	-0.2642	0.2135	0.0337	0.17	0.1439	0.1855	0.9211	0.8262	0.0083	0.1482
BP0294	putative 5(3)-deoxyribonucleotidase	0.0446	-0.0713	0.1998	0.0856	-0.0008	0.0767	0.1958	0.2888	0.2416	-0.1479	0.2751	0.3066	0.3882	0.2719	0.6379	-0.1747	0.318	0.2171	0.3009	-0.177	0.2419	0.2074	0.2293	0.4672	0.0198	0.0153	0.3535	0.2936	0.395	-0.0085	0.2054	0.0897	0.224	-0.0843	0.0995	0.2246	0.0327	0.2547	0.3314	0.523	0.3109	0.6063	0.3812	0.1095	0.508	0.3495	0.0856	0.4741
BP0296	hypothetical protein	0.5069	0.6025	0.5155	0.1012	0.101	0.5451	0.682	0.5267	0.3213	0.5423	0.4077	0.2959	0.5091	0.3692	0.4711	0.6659	0.1834	0.4659	-0.0749	-0.3249	0.4099	0.4171	0.3235	0.6437	0.3824	-0.0072	0.1665	0.225	0.3047	0.0648	0.4653	0.6158	0.0061	-0.2534	0.0452	0.0383	0.5391	0.3464	0.1355	0.0837	0.4479	0.3681	0.3888	0.9112	1.0305	1.1427	0.4655	0.3261
BP0298	conserved hypothetical protein	0.3955	-0.0441	-0.0028	-0.4545	-0.2304	-0.4848	-0.2345	0.0573	0.0443	-0.5692	0.5719	0.0383	0.1325	0.0962	-0.1665	0.2579	-0.1073	-0.2924	-0.4028	-0.1637	-0.2361	-0.4051	-0.0452	0.2102	0.0043	0.0987	-0.1556	0.0039	0.5968	0.4161	1.1504	0.5264	-0.1571	-0.1251	0.3874	-0.1316	-0.0232	0.296	0.015	0.0883	0.0628	0.1999	0.016	0.1597	0.541	0.8404	0.0506	0.1364
BP0299	MarR-family transcriptional regulator	0.0214	0.1482	0.5981	-0.4238	0.0536	-0.1046	0.2103	-0.3926	-0.4141	-0.4022	0.2158	0.1312	0.5785	-0.1474	0.0142	-0.4423	-0.2051	0.0863	-0.0695	-0.1581	-0.3502	-0.2437	0.2167	0.3322	-0.134	0.1722	0.3625	-0.0388	-0.7216	-0.3831	0.3331	0.2496	-0.0578	0.0621	0.1633	-0.0896	0.1146	0.3981	0.2861	0.1895	0.096	-0.0289	-0.2708	0.3947	0.6974	0.8238	-0.0733	0.3047
BP0300	putative esterase	0.1451	-0.0745	-0.6525	0.0367	-0.1076	-0.2446	-0.1065	0.5803	0.0785	-0.6735	0.1465	0.0213	0.0744	0.0417	0.3795	-0.0288	0.4909	-0.1296	-0.1743	-0.7395	-0.1803	-0.031	0.2164	0.659	-0.1324	-0.1063	0.1253	0.5164	-0.0699	-0.4588	-0.0092	0.3136	-0.1401	-0.645	-0.1492	-0.1831	-0.0478	0.0783	0.2094	0.6169	0.09	0.1254	0.0296	0.0051	0.6143	0.3647	0.0191	0.4308
BP0301	putative ABC transporter substrate binding protein	-0.1648	-0.2175	-0.4092	-0.3198	-0.2127	0.2454	0.599	0.718	0.4223	-0.5542	0.0129	-0.1793	-0.1501	0.1176	0.1656	0.0437	0.2601	-0.1628	-0.193	-0.2091	-0.1654	0.1287	0.2398	0.3585	-0.0829	0.0018	0.0422	0.227	-0.0888	-0.7216	-0.0879	-0.0816	-0.4302	-0.35	-0.0315	-0.2323	0.0918	0.3562	-0.0219	0.3748	0.3312	0.0106	0.09	-0.2538	0.3697	0.2836	-0.0073	0.2872
BP0302	probable branched-chain amino acid transport system, permease component	-0.2334	-0.3317	0.0647	-0.6108	-0.1402	-0.1166	-0.1166	-0.1675	0.0921	-0.3889	0.1149	0.3065	-0.1263	0.0389	0.3936	0.3131	-0.2922	-0.2517	-0.4006	-0.0712	-0.0564	-0.4655	-0.1785	-0.2376	-0.1198	-0.4454	-0.1779	-0.5922	0.1811	-0.4424	-0.0134	0.1042	-0.2951	-0.1803	-0.0099	-0.1708	-0.1773	-0.1655	-0.0503	-0.3433	-0.3652	0.2052	0.0187	-0.348	0.7539	0.8068	-0.2439	-0.4801
BP0303	probable branched-chain amino acid transport system, permease component	0.3635	-0.408	-0.1	-0.6779	-0.2309	-0.2502	-0.4684	-0.2852	-0.0435	-0.1768	0.093	0.3457	-0.075	0.053	0.665	0.5624	-0.1571	-0.2974	-0.3546	-0.1056	-0.1563	-0.1942	-0.3359	-0.3667	-0.33	-0.5316	-0.2909	-0.4549	0.2275	-0.6549	-0.0697	0.1174	-0.3653	0.129	0.2548	-0.3289	-0.1863	-0.4039	-0.3727	-0.4395	-0.5356	0.3343	-0.1595	-0.4534	0.694	1.174	-0.0994	-0.4941
BP0304	putative branched-chain amino acid transporter, ATP-binding protein	-0.016	0.0916	0.5168	-0.386	-0.1551	-0.1118	0.077	-0.2484	-0.0505	-0.2552	0.5135	-0.4226	0.1398	0.0518	0.1506	-0.1178	-0.1884	0.1492	-0.1935	0.5206	-0.1934	-0.1309	0.2537	0.0226	-0.0755	0.3517	0.07	-0.123	0.0142	-0.2155	0.5006	0.4568	-0.1365	0.4705	0.5292	-0.0698	-0.0524	0.1509	0.0722	-0.6675	0.1336	-0.0054	0.1329	0.303	0.4864	1.134	0.183	0.0613
BP0305	high-affinity branched-chain amino acid transporter, ATP-binding protein	-0.4193	0.2574	0.0586	-0.6091	-0.1373	0.0507	-0.1673	-0.4686	-0.1553	-0.2082	0.1721	0.0406	-0.1212	0.4277	-0.0282	0.2294	-0.0432	0.334	0.038	-0.7668	0.1465	-0.1831	-0.5771	-0.003	0.1515	0.0922	0.3411	-0.6726	0.1021	-0.0162	-0.0921	0.5286	-0.2168	-0.5538	-0.0104	-0.0052	0.0265	-0.0498	-0.2342	-0.6689	-0.2263	0.2479	0.1543	0.0214	0.4213	0.6929	-0.6324	-0.4468
BP0306	probable bifunctional hydroxylase/oxidoreductase (Pseudogene)	-0.2206	-0.7491	-0.1585	-0.4349	0.2729	-0.474	-0.4364	0.2035	-0.2118	0.1375	0.2352	0.6762	-0.6079	0.26	0.944	0.9683	0.5406	-0.9942	-0.1254	-0.4988	-0.2812	-0.661	-0.0079	0.3103	-0.2926	-0.3012	-0.5416	-0.2503	0.7164	-0.4732	-0.3211	0.2729	0.0372	-0.3503	0.3432	-0.0617	-0.2208	-0.872	-0.6314	-0.3918	-0.99	0.7515	-0.9102	-0.8912	0.9159	0.6157	-0.761	-0.6873
BP0308	probable short chain dehydrogenase (Pseudogene)	0.2551	-0.1752	0.6108	-0.7077	-0.1231	-0.2909	0.0046	-0.6193	-0.5036	-0.6263	0.6906	-0.0163	0.0998	0.1655	-0.0569	0.5749	-0.3991	-0.125	-0.6037	0.6187	-0.4662	-0.1692	0.3863	-0.0885	0.037	0.6072	-0.0102	-0.2319	-0.5028	-0.6572	0.5616	0.1288	-0.3697	0.4323	0.3059	-0.4751	-0.1671	0.162	0.1531	-0.3068	0.1052	-0.0416	-0.5404	0.0216	0.4245	0.9114	0.0355	-0.1976
BP0309	putative enoyl-CoA hydratase/isomerase	0.1038	-0.0148	-0.0446	-0.2545	-0.1757	-0.0337	-0.191	-0.0113	-0.0615	-0.6689	0.4616	0.2523	0.2353	0.1896	0.4103	1.4021	0.1259	-0.0213	-0.0345	0.1212	-0.0447	0.0716	0.3499	0.4337	0.1448	-0.2837	0.2588	0.2302	0.0293	-0.2664	0.4985	0.2497	0.0551	0.1958	0.3493	-0.0202	0.0579	0.1792	-0.044	0.028	0.2552	0.3147	0.0453	0.0791	0.4561	0.4833	-0.3915	0.2199
BP0310	putative acyl-CoA dehydrogenase	0.2372	0.2504	1.0552	-0.9789	-0.2312	-0.5553	-0.4143	-0.9681	-0.7514	-0.9952	0.8701	0.1964	-0.1011	0.0193	-0.2431	0.5676	-0.4906	-0.4038	-0.6269	0.5499	-0.4143	-0.7732	-0.3189	-0.2116	-0.1046	0.6017	-0.5191	-0.6171	0.0438	-0.2925	1.2695	0.0879	-0.6219	0.3917	0.6935	-0.6286	-0.03	-0.0656	0.0308	-0.595	-0.488	0.0888	-0.5904	0.0538	0.418	1.2743	0.2334	-0.4645
BP0311	probable acid-coenzyme A ligase	0.3059	-0.2068	-0.0062	-0.4176	-0.3605	-0.611	-0.5035	-0.5849	-0.6913	-0.5246	0.4195	0.305	0.2811	0.0633	0.1487	0.1493	-0.1107	-0.3795	-0.1888	-0.3483	-0.4419	-0.587	-0.2264	0.0585	-0.4667	-0.3616	-0.1804	-0.4705	-0.0557	-0.1317	0.2567	0.0055	-0.1074	0.1176	0.0907	0.014	-0.3094	-0.1704	-0.0556	-0.1706	-0.5198	0.1106	-0.4256	-0.2435	0.5209	0.2508	-0.0786	-0.1576
BP0312	probable 4-hydroxybenzoyl CoA thioesterase	-0.1689	-0.6428	-1.3307	-1.1651	-0.3152	-0.3013	-1.2773	-1.0413	-0.4199	-0.2476	0.0516	0.7382	-0.1984	0.0897	0.9015	0.1533	0.2501	-1.2658	-0.1883	-0.5496	-0.4723	-0.7277	0.0738	-0.0974	-0.4448	-0.7105	-1.068	-0.9555	0.7728	-0.9995	0.0506	0.4078	-0.3089	0.341	0.3371	0.1153	-0.5292	-0.8513	-1.2933	-1.1431	-0.5102	0.7024	-0.7871	-0.9037	0.9063	0.6118	-1.3064	-1.1027
BP0313	conserved hypothetical protein	0.3374	0.0716	0.9635	-0.3694	0.1369	-0.1915	0.0758	-0.0503	-0.4355	-0.1264	0.1368	0.0248	0.2798	-0.22	0.0779	-0.2525	-0.3756	0.2913	0.242	-0.0929	0.0552	0.5233	-0.0752	-0.0709	0.3671	0.7162	1.0308	-0.5224	-0.3869	-0.3351	0.0662	-0.08	0.0742	0.0025	0.0701	-0.2158	0.0672	0.1272	0.1264	0.0561	0.2009	0.0688	0.2517	-0.0855	0.4495	0.7583	0.091	-0.0159
BP0314	conserved hypothetical protein	-0.0646	0.0267	-0.2323	-0.1208	-0.3585	-0.5907	-0.7006	-0.2591	-0.1654	-0.3887	-0.2179	-0.0648	0.046	-0.0605	-0.1533	0.2705	-0.1465	-0.3987	-0.4534	-0.9771	-0.3401	-0.2242	0.0588	0.2058	-0.39	-0.1049	-0.1265	0.1918	-0.1885	-0.3544	-0.0561	0.3781	-0.3927	-0.7759	-0.227	-0.3401	-0.4439	-0.1919	-0.5405	-0.0762	-0.189	-0.0651	-0.076	0.0668	0.3737	0.2224	-0.4227	0.0138
BP0315	glutamate-1-semialdehyde 2,1-aminomutase	-0.0232	-0.1545	0.0518	-0.0036	0.244	-0.3864	-0.4889	-0.223	-0.0657	0.2964	0.373	0.2719	0.2922	0.1291	0.0829	0.7719	-0.1092	0.2684	0.1623	0.3894	-0.0177	0.0336	-0.2052	0.2084	0.0335	-0.0174	-0.0467	0.2787	0.3936	0.478	0.4813	0.3441	0.4064	0.2472	0.0861	0.2707	0.0117	0.0377	-0.036	0.2289	0.0014	0.3207	0.2465	0.1201	0.5477	0.6085	0.4522	0.2993
BP0316	thiamine-phosphate pyrophosphorylase	0.2097	-0.1056	0.6179	-0.5381	-0.1525	-0.3587	-0.2182	-0.4319	-0.4639	-0.7095	0.5893	0.1987	0.1517	0.1431	-0.0507	-0.0533	-0.1213	-0.043	-0.2262	0.2175	-0.2118	-0.3462	0.2782	0.1231	0.0294	0.3381	0.0666	-0.0609	-0.0949	0.0302	0.9872	0.039	-0.2857	0.0719	0.405	-0.2709	-0.0414	0.1394	0.0105	-0.0006	-0.2625	0.0399	-0.2911	0.1895	0.3951	0.8065	-0.067	0.0567
BP0317	phosphomethylpyrimidine kinase	-0.1426	-0.0167	0.0198	-0.1859	-0.0089	-0.417	-0.5778	-0.1496	-0.1479	-0.0684	0.1681	0.2572	0.1853	0.1817	0.0862	-0.4519	0.0898	0.0053	-0.0104	-0.5881	-0.0764	-0.2896	-0.2354	0.3978	0.0678	-0.0155	0.0484	-0.0369	0.5339	0.2863	0.4138	0.2743	0.0395	-0.283	0.0986	-0.0487	-0.0928	0.0599	-0.3177	0.0754	-0.0866	0.2743	0.2573	0.2258	0.6683	0.5168	0.1041	0.1407
BP0318	rubredoxin	-0.27	-0.3737	-0.1242	-0.4551	-0.306	-0.9144	-1.1267	-0.6512	-0.7036	-0.8358	-0.2529	-0.2404	-0.0034	-0.3434	-0.3274	-0.235	-0.2939	-0.3134	-0.4923	-1.1891	-0.498	-0.2618	-0.11	0.1995	-0.0979	-0.1045	0.3305	0.2305	-0.7295	-0.5817	-0.3271	0.7725	-0.6344	-0.8681	-0.3735	-0.6225	-0.4301	-0.4878	-0.4945	-0.4218	-0.3601	-0.2946	-0.4126	0.6339	0.9124	1.0378	-0.7735	-0.3388
BP0319	putative transcriptional regulator	-0.206	-0.1915	-0.0709	-0.4227	-0.2937	-0.5585	-0.4453	-0.549	-0.5509	-0.4281	-0.1631	-0.1843	-0.0715	-0.195	-0.2283	-0.2409	-0.2629	-0.0419	-0.4098	-0.6501	-0.28	-0.0903	-0.0188	0.1273	-0.0589	0.0453	0.3728	0.2731	-0.4466	-0.4976	0.0148	0.5136	-0.5083	-0.6732	-0.4634	-0.5698	-0.1753	-0.2572	-0.339	-0.4225	-0.3298	-0.1731	-0.1517	0.7318	0.8598	1.0488	-0.3866	-0.2226
BP0320	conserved hypothetical protein	-0.1466	-0.2976	-0.3883	-0.5343	-0.1873	-0.6322	-1.1418	-0.6565	-0.6944	-0.4309	-0.2099	-0.0749	-0.0318	-0.1818	-0.195	-0.2014	-0.2828	-0.3463	-0.4828	-0.7551	-0.5309	-0.3293	-0.5538	0.0675	-0.0252	-0.0984	0.1787	0.1181	-0.2549	-0.4631	0.0581	0.6372	-0.4384	-0.6326	-0.3317	-0.3098	-0.5091	-0.4127	-0.5323	-0.5353	-0.7337	-0.0395	-0.2914	0.4727	0.9999	0.6857	-0.1345	-0.2443
BP0321	aspartate carbamoyltransferase	0.0921	0.0482	0.002	-0.3471	-0.0879	-0.4562	-1.0454	-0.5312	-0.6898	-0.3156	-0.115	-0.0304	-0.1095	0.146	-0.0652	-0.2127	-0.107	0.0812	-0.0948	-0.5588	-0.3602	0.0497	-0.0235	0.1377	-0.0233	-0.0022	0.3178	0.2025	-0.3171	-0.5049	-0.2094	0.2972	-0.3737	-0.4819	-0.4583	-0.0157	0.0057	-0.0624	-0.2496	-0.2279	-0.0958	0.1857	-0.1653	0.6571	0.7202	0.7429	-0.2371	-0.203
BP0322	dihydroorotase	0.3094	-0.0085	0.0586	-0.1838	-0.0856	-0.7599	-0.9213	-0.4848	-0.565	-0.0996	-0.2085	0.18	0.014	0.1958	0.0437	0.2313	-0.2378	0.2321	-0.2719	-0.461	0.0045	-0.1133	-0.198	0.0432	0.1767	0.2558	0.3357	0.326	0.1427	-0.3815	-0.1061	0.293	-0.3356	-0.5631	-0.1083	-0.1371	-0.0003	-0.1414	-0.3222	-0.1121	-0.431	0.235	0.1634	0.5113	0.883	0.8151	0.1851	-0.0737
BP0323	acyltransferase	0.1846	-0.0041	0.0213	-0.0852	-0.163	-0.4189	-0.3953	-0.2159	-0.0235	-0.3794	0.1355	0.4308	0.0684	0.3062	0.0684	-0.0422	0.1223	-0.0412	-0.0955	-0.4566	0.1503	-0.5655	0.0052	0.446	0.26	0.4242	0.2483	0.1636	0.4964	-0.0454	0.174	-0.0131	-0.2201	-0.1345	0.0936	-0.1935	0.0814	-0.0911	-0.2384	0.0611	-0.2304	0.3603	0.1488	-0.1071	0.4932	0.2549	-0.2677	0.239
BP0324	diadenosine-tetraphosphatase	0.4088	-0.0443	0.2573	-0.165	0.1584	0.06	0.1391	-0.0225	-0.0913	-0.0554	0.138	0.1865	0.2683	0.2815	0.3189	0.1393	0.0686	0.0367	-0.1146	-0.3638	0.073	-0.1527	-0.0755	0.2867	0.078	-0.245	0.0138	-0.0086	0.4108	-0.1697	0.1681	0.5539	-0.1793	-0.2737	0.1475	-0.1011	-0.0222	0.0127	0.1562	0.054	0.0728	0.3952	0.0917	0.0927	0.7485	0.8194	0.1095	0.0253
BP0325	putative membrane protein	-0.2179	0.3447	-0.0722	0.1503	-0.19	0.0639	-0.2456	0.2916	0.2068	-0.4678	-0.1732	0.2539	0.0137	0.1612	0.108	-0.3343	0.2066	-0.0048	-0.044	-0.0819	0.1008	0.1745	0.36	0.4242	0.1062	0.1451	0.1757	0.2104	0.1789	-0.1422	0.0668	-0.0226	0.0063	-0.0686	0.0556	-0.0822	0.0782	0.105	-0.0744	0.1559	0.1968	0.1273	0.1885	-0.2254	0.1534	0.1269	-0.2566	0.3593
BP0326	monofunctional biosynthetic peptidoglycan transglycosylase	-0.0489	0.1706	0.0759	-0.2712	-0.1879	-0.6327	-0.1393	-0.1368	-0.1008	-0.4839	-0.1499	0.15	0.0488	-0.0714	-0.1923	-0.1743	-0.1027	-0.1897	-0.1108	-0.7351	-0.1856	-0.1947	-0.22	0.2423	0.0324	-0.1298	0.1172	0.1438	0.0926	0.0126	0.2592	0.818	-0.2181	-0.5853	-0.0768	-0.1364	-0.1263	-0.2155	-0.3671	0.0003	-0.3441	0.1939	0.0729	0.3102	0.9786	0.9459	-0.3352	-0.0276
BP0328	conserved hypothetical protein	0.2141	-0.6924	-0.6802	-0.5873	0.0239	-0.5957	-0.7506	-0.4491	-0.573	-0.3416	0.245	0.5932	-0.1045	0.1833	0.4957	0.1813	-0.0359	-0.6021	-0.5333	-0.7654	-0.2301	-0.5464	0.1185	-0.0692	-0.2205	-0.4013	-0.619	-0.595	0.5605	-0.3125	-0.1432	0.0946	-0.5133	-0.4994	-0.1669	-0.7253	-0.3342	-0.4565	-0.5419	-0.3344	-0.3717	0.7181	-0.5678	-0.3341	0.8063	0.7785	-0.3421	-0.704
BP0329	putative coenzyme A ligase	0.2395	-1.0094	-0.2747	-0.6907	0.1712	-0.8957	-0.5736	-0.5394	-0.3342	0.1234	0.463	0.4017	-0.2652	0.0617	0.8074	-0.1046	0.0196	-0.7553	-0.251	-0.1421	-0.5154	-0.3779	-0.1781	-0.267	-0.4027	-0.5792	-0.9288	-0.9233	0.4109	-0.7128	-0.4058	-0.0636	-0.5502	0.1081	0.2007	-0.2783	-0.5385	-0.3412	-0.822	-0.6664	-0.6689	0.4808	-0.5577	-0.5752	0.8675	0.78	-0.3029	-0.8278
BP0330	conserved hypothetical protein	0.3191	-0.5791	-0.8269	-0.5119	-0.1275	-0.5165	-0.8156	-0.4536	-0.7118	-0.4513	-0.0084	0.2422	-0.4629	0.0854	0.3864	-0.3047	-0.2413	-0.309	-0.164	-0.5296	-0.1993	-1.0755	-0.2815	0.0084	-0.501	-0.674	-0.5372	-0.6401	-0.0129	-0.6324	-0.0326	0.7954	-0.4219	-0.226	0.0508	0.081	-0.4979	-0.6394	-0.4077	-0.3515	-0.2591	0.3658	-0.4743	-0.6638	0.8506	0.6052	-0.2642	-0.3453
BP0331	conserved hypothetical protein	0.1666	-0.1569	0.2691	-0.1839	-0.2799	-0.3644	-0.5158	-0.0117	0.0193	-0.5874	0.1372	0.0445	-0.0002	0.1129	0.0056	-0.089	-0.0321	0.0244	-0.3059	-0.7045	-0.0925	-0.389	-0.2264	0.4031	0.0435	0.0382	0.0699	-0.0411	0.3811	-0.074	0.4806	0.4918	-0.2107	-0.3799	0.2817	-0.2388	-0.0892	-0.1126	0.0852	0.0277	-0.2873	0.3539	0.2234	-0.0366	0.8008	0.8517	-0.0367	0.1358
BP0332	conserved hypothetical protein	0.6675	0.1496	0.507	-0.2924	0.5159	-0.4514	-0.7715	-0.6286	-0.7408	-0.5241	0.1303	0.0437	-0.1533	0.0498	0.1948	-0.0001	-0.0978	-0.6317	-0.6154	-0.304	-0.4826	-0.9774	-0.1332	-0.1445	-0.753	-0.916	-0.5799	-0.3816	0.2289	-0.276	0.2963	0.0569	-0.3171	-0.2683	0.1968	-0.2583	-0.4425	-0.4866	-0.3746	-0.405	-0.8293	0.0595	-0.5605	-0.6135	0.3707	0.5129	-0.3347	-0.5459
BP0333	metallo-beta-lactamase family protein	0.1009	-0.121	-0.4043	-0.1056	-0.1561	0.2296	0.0138	0.4642	0.2975	-0.4453	0.1455	0.2261	-0.0003	0.2827	0.3059	-0.0729	0.2981	-0.1485	0.0209	-0.308	0.1391	-0.0366	0.3168	0.4909	-0.0698	0.126	0.1535	0.3565	0.4237	0.1425	0.3456	0.4649	0.2019	-0.1828	0.2042	0.2508	0.0264	0.0316	-0.1768	0.3068	0.2682	0.3525	0.329	-0.0209	0.5914	0.2328	0.0045	0.4517
BP0334	putative exported protein	-0.1543	-0.4891	-0.1376	-0.2355	-0.15	-0.0746	-0.0534	0.2222	0.061	-0.5923	0.1065	0.0667	-0.0111	-0.039	-0.0609	-0.0872	0.1064	-0.1613	-0.1881	-0.2788	-0.1476	0.0389	0.2288	0.4471	0.0024	-0.0746	0.0526	0.192	-0.1444	-0.4853	0	0.3927	-0.2854	-0.3192	-0.0453	-0.0779	-0.1345	-0.0551	0.0806	0.0072	0.0879	0.0001	0.059	0.0338	0.4292	0.5595	-0.3289	0.1843
BP0335	LysR-family transcriptional regulator (Pseudogene)	-0.1063	-0.3082	-0.1054	-0.2151	-0.2534	-0.7179	-0.8963	-0.2452	-0.1206	-0.5247	-0.3495	0.0863	-0.2712	-0.0933	-0.2407	-0.3165	-0.2503	-0.1582	-0.1563	-0.3532	-0.3329	-0.2624	-0.2788	0.0546	-0.1984	-0.2273	-0.0438	0.1264	0.1659	0.0649	-0.2386	1.1816	-0.1763	-0.1896	-0.1661	-0.2209	-0.2881	-0.4045	-0.1642	-0.0759	-0.379	-0.0839	0.0123	-0.0023	1.1043	1.1481	-0.4429	0.1409
BP0336	putative exported protein (pseudogene)	0.1544	0.1719	-0.2522	0.5565	0.1443	-0.4218	-0.5853	0.327	-0.0067	-0.4258	0.0654	0.188	-0.1705	0.2456	0.127	-0.2724	0.4016	-0.1028	-0.0901	-0.5901	0.0148	0.269	0.5308	0.5562	0.087	-0.1022	0.1602	0.6467	0.5115	0.0404	0.3196	1.3068	-0.0552	-0.5634	-0.139	-0.1144	-0.0143	-0.181	-0.0838	0.6016	0.4178	0.1481	0.2113	0.4156	1.2168	0.9969	-0.2107	0.4816
BP0337	putative exported protein	0.1337	0.0266	0.4043	-0.0007	0.0484	-0.4525	-0.4197	-0.0755	-0.2635	0.1148	0.1619	0.1323	-0.1299	0.1542	0.0423	0.2177	-0.1027	0.1187	-0.2481	-0.5923	-0.0361	-0.1123	-0.1205	0.1268	0.1702	-0.0905	0.1196	-0.0549	0.5145	0.1011	0.1155	0.8269	0.0048	-0.3849	0.1048	-0.1065	-0.0202	-0.1731	-0.0605	0.0105	-0.079	0.2208	0.2258	0.3892	0.68	1.0176	0.0721	0.0253
BP0338	putative membrane protein	0.0336	0.3685	-0.0199	0.0473	0.0813	-0.367	-0.3576	-0.0034	-0.0629	-0.5965	0.1209	0.1739	0.1486	0.0468	0.0813	-0.1673	0.1016	0.0632	0.0664	0.0154	-0.0824	0.0867	0.2837	0.4789	0.1025	0.2079	0.1559	0.1884	-0.2606	-0.2955	0.0597	0.2156	0.1785	0.2179	0.0636	0.0529	0.1499	0.0907	-0.2325	0.2103	0.477	0.3373	0.2822	0.2078	0.3262	0.2287	-0.2934	0.1992
BP0339	methylated-DNA--protein-cysteine methyltransferase	0.1383	-0.4282	-0.7382	-0.3276	-0.0489	-0.7089	-0.9105	-0.4315	-0.6059	-0.2414	0.1001	0.3274	-0.1322	0.0689	0.4499	-0.1896	-0.076	-0.416	-0.2585	0.2783	-0.4966	-0.5586	-0.0153	0.1089	-0.3612	-0.607	-0.5032	-0.451	0.1266	-0.4551	-0.1502	0.1761	-0.4016	-0.2415	-0.0016	-0.1396	-0.3105	-0.5205	-0.8683	-0.324	-0.3602	0.2829	-0.2438	-0.178	0.7868	0.602	-0.4406	-0.1483
BP0340	alkylated DNA repair protein	0.072	-0.0845	0.0636	-0.1861	0.224	-0.3848	-1.4054	0.0575	0.1688	-0.2934	0.3319	0.2924	0.3654	0.2969	0.1981	-0.0257	0.2413	0.3216	0.2178	-0.4652	-0.0438	-0.1534	0.0707	0.4691	0.0667	0.1153	0.1106	0.0999	0.2577	-0.0446	0.36	0.4227	0.1707	-0.2273	0.0364	0.0667	0.0571	-0.1642	-0.2552	0.2719	0.0876	0.3035	0.2565	0.2339	0.7866	0.6242	-0.2824	0.3524
BP0341	conserved hypothetical protein	-0.2868	-0.2019	-0.4725	0.3808	-0.1732	-0.4669	-0.1269	0.456	-0.3128	-0.3132	0.2091	-0.1141	-0.0539	0.049	0.0807	-0.0491	0.4457	-0.0136	-0.259	-0.262	-0.3256	0.0362	0.6511	0.67	-0.096	-0.0131	0.1619	0.3888	-0.2787	-0.5614	0.5332	0.4281	-0.2247	-0.5152	-0.2339	-0.1657	-0.1479	-0.145	-0.0114	0.8672	0.0714	0.0649	-0.0412	0.1628	0.5716	0.6621	0.1862	0.4116
BP0342	conserved hypothetical protein	0.1005	0.1974	0.8641	-0.1117	0.0416	-0.044	-0.1755	-0.0442	0.0116	-0.1949	0.2264	0.4271	-0.0844	0.0263	-0.2897	0.6842	-0.0391	0.3479	0.0218	-0.0662	0.182	0.1262	0.2286	0.5869	0.246	0.359	0.0836	0.0572	0.5642	0.3163	0.2653	0.6998	0.0606	-0.079	0.2174	-0.0151	0.0689	0.1079	0.1606	0.2525	0.0266	0.2865	0.375	0.5852	0.6691	0.9388	-0.0978	0.2413
BP0343	putative ATP-binding component of hemin transport system	0.4211	-0.1655	0.0156	-0.3433	0.0726	-0.665	-0.7072	-0.3962	-0.487	-0.9606	0.5512	0.1982	0.0771	-0.001	0.4199	0.2893	0.0759	-0.0657	-0.2927	0.0451	-0.4916	-0.5028	-0.0881	0.1341	-0.0783	0.0431	-0.0293	-0.0982	0.0407	-0.4722	0.6532	0.1874	-0.3026	0.0512	0.241	-0.241	-0.1668	-0.2166	-0.1297	-0.0129	-0.3225	0.1618	-0.3265	-0.0794	0.6998	0.6691	-0.2248	0.221
BP0344	putative hemin permease	0.2287	-0.0688	-0.0125	-0.1552	-0.0003	-0.6337	-0.3153	-0.13	-0.1259	-0.2469	0.0612	0.2216	-0.0669	0.4229	0.2993	-0.0006	-0.065	-0.0082	-0.0428	-0.5234	-0.0323	-0.1013	-0.0439	0.2859	0.208	-0.0941	0.1921	0.1046	0.1846	-0.2159	0.1593	0.3852	-0.1773	0.0271	0.1276	0.1236	-0.0977	0.102	-0.1773	0.0599	-0.2682	0.3126	0.1914	0.1478	0.6039	0.4567	0.081	0.3539
BP0345	putative hemin binding protein	0.0702	-0.0991	0.4486	-0.3364	-0.0228	-0.3287	-0.1607	-0.3364	-0.0002	-0.1704	-0.0137	0.2611	0.3355	0.3099	-0.2358	-0.578	-0.1735	0.252	-0.0894	-0.5288	0.0154	-0.3188	-0.1602	0.2244	0.1026	0.123	0.4062	-0.1591	0.4439	-0.0792	0.1932	0.5729	0.0186	-0.2521	0.274	-0.0363	0.0412	0.1563	0.194	-0.0661	-0.1381	0.2508	0.2257	0.2024	0.5281	0.6261	-0.0192	0.1155
BP0346	putative hemin transport protein	0.1349	0.1908	0.1636	0.0743	0.1045	-0.2223	-0.0852	0.0694	-0.072	-0.3211	0.1248	0.1855	0.3369	0.3427	0.0234	0.1165	-0.0055	0.028	-0.3178	-0.8859	-0.0345	-0.283	-0.3366	0.4059	0.0257	-0.1104	0.1188	0.0383	0.5182	-0.0476	0.3548	0.4965	-0.245	-0.5912	0.0364	-0.3299	0.0753	-0.0307	-0.1331	0.1206	-0.1313	0.2166	0.2154	0.2323	0.6957	0.7439	-0.0899	-0.1091
BP0347	outer membrane heme receptor	0.1773	0.2439	0.1034	-0.5905	0.1325	-0.3862	-0.2495	-0.6929	-0.5711	-0.3044	-0.0472	0.1542	0.036	0.0147	0.3936	0.6175	-0.1861	0.0134	-0.3508	-0.2685	-0.1866	-0.2467	-0.2209	-0.0592	-0.0597	-0.394	0.0193	-0.4019	-0.29	-0.384	-0.1202	0.2982	0.0789	0.0835	0.0712	-0.0181	0.0097	0.2078	-0.295	-0.3278	-0.0125	0.3385	-0.174	0.2513	0.7038	0.677	0.0081	-0.1401
BP0348	heme uptake transmembrane sensor	0.101	0.187	0.1536	-0.3294	0.0207	-0.4993	-0.1324	0.0494	0.097	-0.3435	0.2162	0.1561	0.3173	0.0847	0.1504	0.1978	0.2337	0.081	0.2276	0.223	-0.1739	0.1415	0.4058	0.5666	0.0846	0.3143	0.4502	0.3971	-0.2247	-0.2509	0.5633	0.129	0.2617	0.2704	0.3115	0.2227	0.0259	0.1188	0.3563	0.3177	0.1666	0.2145	0.2973	0.093	0.5968	0.6211	-0.0091	0.5326
BP0349	heme uptake regulator	0.066	-0.7143	-0.7569	-0.4208	-0.4765	-0.3715	-0.3688	-0.1097	-0.1215	-0.6013	-0.0186	0.1622	0.0129	0.0681	0.656	-0.3287	0.3449	-0.5844	-0.5033	-0.794	-0.0115	-0.2724	0.2005	0.6599	-0.4899	-0.289	0.1185	0.3549	0.0117	-0.7993	-0.2243	0.4227	-0.3949	-0.5299	0.1282	-0.0806	-0.1729	-0.5191	-0.3768	0.0169	-0.0912	0.1832	0.174	-0.1681	0.5632	0.5607	-0.517	-0.0303
BP0350	hypothetical protein	-0.0669	-0.3989	-0.5312	-0.238	-0.11	-0.8525	-0.786	-0.2596	-0.3626	-1.0268	-0.0738	-0.0105	-0.1762	-0.0364	-0.1315	-0.0811	-0.0099	-0.2901	-0.197	-0.7396	-0.3134	-0.5362	-0.0383	0.2483	-0.1957	-0.1916	-0.199	0.111	0.192	-0.4693	0.2094	0.9465	-0.1681	-0.4227	0.0867	-0.3614	-0.3693	-0.3322	-0.0982	0.1942	-0.3395	0.0214	-0.0304	-0.3405	1.507	1.2388	-0.2532	0.113
BP0351	putative ferredoxin	-0.1247	-0.0194	-0.3419	-0.2955	-0.2864	0.3426	0.3044	0.4688	0.9366	-0.5974	0.2526	0.2339	-0.2097	-0.063	0.4854	0.2663	0.1452	-0.2381	-0.1121	-0.3328	0.1421	0.3043	0.1056	0.7799	-0.048	0.2731	0.0667	0.2896	-0.0707	-0.7005	-0.2467	0.6581	0.2151	0.0036	-0.0301	-0.1167	-0.1929	-0.132	-0.1362	0.5394	0.307	0.1811	0.3969	-0.1104	0.4967	0.2127	-0.4893	0.618
BP0352	hypothetical protein	0.1141	-0.9213	-0.8721	-0.6485	0.0619	0.1969	0.2487	0.5269	0.8396	-0.1979	0.1634	0.354	-0.1067	0.5502	0.2155	1.4564	0.3721	-0.2993	0.0265	-0.2753	0.1597	-0.311	0.0513	0.3477	-0.0771	0.1315	0.0016	-0.0574	0.042	-0.5763	0.3309	0.2321	0.0962	-0.0394	0.3523	0.1243	-0.063	-0.2847	-0.1823	0.0803	0.1559	0.6337	0.4295	-0.5043	0.8116	0.3758	-0.2313	0.2435
BP0353	putative ferredoxin	0.4199	-0.1888	1.7992	-0.8822	0.0534	-0.3127	-0.0013	-0.5324	-0.4511	-0.8023	1.5131	-0.1815	0.7914	-0.5105	0.0162	1.4251	-0.5622	0.0347	-0.4937	1.2336	-0.8627	-0.8087	-0.0773	0.1658	0.0058	0.8615	0.1209	-0.1975	-0.613	-0.3878	1.7063	0.0114	-0.8909	0.7568	0.4429	-0.5837	-0.0857	0.0888	0.3738	-0.0718	-0.6942	-0.3609	-0.4061	0.2111	0.4232	1.9907	0.5932	0.0891
BP0354	probable ornithine cyclodeaminase	0.5128	0.1705	1.4803	-0.8587	0.1862	0.2025	0.1997	-0.9975	-0.3749	-0.5927	1.0094	0.2222	0.3641	0.0896	0.2602	-0.5457	-0.4505	-0.1927	-0.3987	0.609	-0.3662	-0.0966	0.3524	-0.2508	0.0142	0.7521	0.0995	-0.4658	-0.4891	-0.5926	0.8515	0.2425	-0.501	0.6669	0.674	-0.2836	0.088	0.3253	0.221	-0.5258	-0.1571	0.2858	-0.6096	0.1228	0.4287	1.5021	0.252	-0.3322
BP0356	GntR-family transcription regulator	-0.1903	-0.5463	-0.4812	-0.385	-0.4576	-0.8715	-0.8965	-0.4344	-0.4289	-0.9004	-0.3804	-0.1933	-0.2354	-0.0467	-0.4614	0.2888	-0.3012	-0.38	-0.2722	-1.098	-0.2678	-0.6196	-0.455	0.1311	-0.1909	-0.387	-0.2312	-0.1112	-0.2314	-0.4269	-0.277	1.0323	-0.4999	-0.7521	-0.136	-0.4058	-0.2821	-0.2427	-0.4298	0.0504	-0.4544	-0.2141	-0.1463	-0.2393	1.1354	0.8416	-0.4284	0.0781
BP0357	putative membrane protein	-0.0972	-0.507	0.1326	-0.5286	0.0269	-0.1159	-0.3841	-0.4984	-0.3049	-0.4032	0.2193	-0.0787	-0.2584	-0.1251	0.0983	0.2107	-0.3339	-0.0155	-0.2934	0.1228	-0.0822	-0.325	-0.2449	0.0745	-0.1074	-0.156	-0.141	-0.306	0.0365	-0.2137	0.2073	1.3436	-0.0598	0.3442	0.2107	-0.2575	-0.227	-0.1397	-0.1987	-0.2332	-0.2813	0.237	0.0438	0.2312	1.5057	1.8541	0.2432	-0.2638
BP0358	putative membrane protein	0.3694	-0.3398	-0.4424	-0.4364	-0.2213	0.3077	-0.0964	-0.2959	-0.3667	-0.2932	0.385	0.1821	-0.0936	-0.0451	0.197	0.0592	-0.0969	-0.2015	-0.5652	0.0054	-0.3201	-0.1148	0.219	0.1323	-0.2476	-0.1943	-0.1709	-0.0147	-0.1475	-0.3345	0.2588	0.824	-0.0584	0.3187	0.1731	-0.2892	-0.276	-0.1452	-0.3104	-0.179	0.1547	0.0192	-0.3041	-0.0299	1.0035	0.9711	0.0524	-0.1605
BP0359	conserved hypothetical protein	0.2593	-0.7763	-0.4306	-0.6771	-0.0482	-0.3155	-0.3121	-0.3615	-0.426	-0.4506	0.1643	0.3051	-0.1091	-0.0145	0.4927	-0.1965	-0.2347	-0.3008	-0.4137	-0.3839	-0.3805	-0.5252	0.0422	-0.1167	-0.4959	-0.623	-0.3202	-0.3498	0.1599	-0.5195	-0.1222	0.1733	-0.0837	-0.0258	0.1286	-0.0728	-0.3054	-0.4367	-0.4737	-0.2093	-0.8134	0.4845	-0.3656	-0.5826	0.7932	1.0764	-0.0522	-0.4224
BP0360	probable aldehyde dehydrogenase	0.1979	-0.4249	-1.6475	-0.9241	0.2188	-1.1329	-1.4613	-0.4797	-0.6214	-0.4055	-0.1172	0.6632	-0.478	0.1727	0.3246	0.0282	-0.3412	-0.539	-0.3869	-0.6339	-0.1773	-0.4004	-0.1253	-0.1564	-0.348	-0.3894	-0.6919	-0.491	0.1836	-0.5331	-0.4664	0.3029	0.003	-0.5221	0.3496	-0.1849	-0.4589	-0.7684	-1.0051	-0.9492	-1.5427	0.582	-0.5473	-0.5112	0.7432	0.1111	-0.4479	-0.116
BP0361	conserved hypothetical protein	0.1454	-0.4548	0.103	-0.4226	-0.1235	-0.4653	-0.3448	-0.0975	-0.5074	-0.5921	-0.0018	0.0169	-0.07	-0.0262	0.1213	0.3708	-0.1897	-0.4351	-0.2422	-0.5621	-0.3486	-0.4968	-0.0387	0.2635	-0.1848	-0.3701	-0.2282	-0.2667	-0.37	-0.2659	-0.314	-0.023	-0.2761	-0.1653	-0.079	-0.1337	-0.0715	-0.1894	-0.3888	-0.0828	-0.1076	0.0859	-0.354	-0.2594	0.447	0.4252	-0.2362	-0.0104
BP0362	CDP-6-deoxy-delta-3,4-glucoseen reductase	0.1869	-0.0031	-0.003	-0.5834	0.0476	0.06	-0.0668	-0.5467	-0.552	-0.1479	0.394	0.139	0.0672	0.0251	0.2496	1.0216	-0.0834	-0.4313	-0.099	-0.1701	-0.2846	-0.1408	0.1098	0.2486	0.0407	-0.0053	-0.0452	-0.0457	-0.3949	-0.2937	0.303	0.2631	-0.1178	0.1782	0.1683	-0.1646	0.3982	0.1988	0.0026	-0.1136	-0.0679	0.1726	-0.2695	0.1025	0.5199	0.2651	-0.2317	-0.0261
BP0363	probable extracellular solute-binding protein	0.2649	0.2077	0.7364	-0.4264	-0.2919	-0.2312	-0.3663	-0.3122	-0.242	-0.5903	0.7275	0.1248	0.5349	0.0168	-0.0407	-0.1703	-0.1171	-0.0969	-0.3496	0.4365	-0.2493	-0.3571	-0.2852	0.0086	-0.2176	0.1029	-0.1138	-0.1413	0.0106	-0.069	1.1071	0.2754	-0.2465	0.3686	0.2611	-0.3685	-0.2625	-0.0167	0.0994	-0.1115	-0.406	0.0045	-0.2591	0.0595	0.4547	0.9974	0.0613	-0.0093
BP0364	putative exported protein	-0.4815	0.1313	0.148	0.0806	0.1048	-0.0117	-0.0521	0.1032	0.0421	-0.2996	0.0298	0.1162	0.0983	0.3172	0.1861	-0.4914	-0.0236	0.0874	0.0073	-0.4143	0.134	0.0585	0.0168	0.3477	0.1503	-0.0871	0.2942	0.2138	0.0996	-0.1206	0.0973	0.6225	0.2013	-0.1459	0.1708	-0.0541	0.1911	0.1748	-0.0096	0.27	-0.0685	0.3707	0.0936	0.3951	0.7645	0.7404	-0.0698	0.2828
BP0366	putative universal stress protein (Pseudogene)	-2.0003	-2.6969	-2.538	-2.1412	-1.7646	-2.8131	-3.1244	-0.6719	-0.627	-2.2305	-1.2227	-0.9049	-0.5054	-1.8469	-0.4702	0.3674	-0.1696	-2.0681	-2.568	-2.4429	-1.8032	-1.7721	-0.0162	0.3695	-2.4117	-2.4273	-0.0758	-0.0672	-1.4871	-0.6576	0.1957	1.7239	-1.9102	-2.1541	-1.8106	-0.9444	-1.6559	-2.3004	-2.2847	-1.7541	-1.4853	-0.9833	-1.2398	1.4751	1.4822	1.411	-2.3299	-1.6851
BP0367	putative membrane protein	0.0011	-0.0657	0.4141	-0.3166	0.0462	0.0653	-0.2276	-0.2459	-0.1043	-0.1693	0.1912	0.2503	0.2716	0.2477	0.1987	0.0501	-0.0047	0.1682	0.0353	0.0235	0.0181	-0.1073	-0.1871	0.2082	0.0137	-0.0136	0.2865	0.0411	0.4132	0.0414	0.279	0.7303	0.1361	0.3871	0.3434	0.0863	0.1424	0.129	-0.0271	-0.1107	-0.0056	0.4361	0.2977	0.6158	0.6477	0.9996	0.0986	-0.0444
BP0368	NADP-specific glutamate dehydrogenase	-0.2241	-0.2115	-0.4756	0.2901	-0.2399	-0.1789	-0.6159	-0.0882	-0.2455	-0.085	0.04	0.0518	0.3586	0.4806	0.3116	0.0535	0.7722	0.4236	0.5971	-0.2822	0.1667	0.0329	0.15	0.5604	0.1122	0.2662	0.5235	0.6739	-0.2555	-0.2615	0.233	-0.6591	0.4352	-0.085	0.2931	0.3131	0.1729	0.4623	0.3344	1.0167	0.2506	0.0393	0.4074	-0.5051	-0.6042	-0.92	0.4205	0.7808
BP0369	putative endonuclease	-0.0784	0.017	0.2573	-0.244	-0.0929	-0.311	-0.1829	-0.0988	-0.4213	-0.5429	0.0381	0.1303	0.4344	0.1672	-0.0351	0.3933	0.0563	-0.0335	0.0377	-0.3381	-0.2798	-0.412	-0.047	0.3953	-0.027	-0.0136	0.2229	0.2869	-0.0221	-0.0002	0.1859	0.0497	-0.0222	-0.1911	0.1507	-0.0814	0.0966	0.4348	0.2441	0.413	0.0352	0.2178	-0.1004	0.1924	0.3168	0.4081	-0.4576	0.4927
BP0370	orotate phosphoribosyltransferase	-0.101	0.2646	-0.2153	0.0443	0.2325	-0.1934	-0.0691	0.5918	0.4701	-0.0053	0.1764	0.4356	0.2312	0.271	0.2103	-0.1304	0.1017	0.2111	0.1069	0.4236	0.0137	0.2226	0.6361	0.4964	0.0918	0.2827	0.1233	0.2828	0.1425	0.0244	0.324	-0.0592	0.2572	0.4685	0.3154	0.1689	0.1474	0.3607	0.2345	0.5391	0.4363	0.2321	0.4209	0.2246	0.0113	-0.0824	0.1767	0.3612
BP0371	glutamyl-tRNA(GLN) amidotransferase subunit B	-0.1373	-0.1267	-0.071	-0.0294	-0.1968	-0.6161	-0.5158	-0.018	-0.3028	-0.512	0.0982	0.1471	0.2985	0.0686	-0.0067	-0.2179	0.024	0.1238	0.0268	-0.4572	-0.2404	-0.4318	-0.0258	0.4653	-0.1386	-0.3467	0.2575	0.4543	0.1449	-0.1439	0.1585	0.0516	-0.1149	-0.3703	-0.1413	-0.1098	-0.0543	-0.014	-0.1316	0.2522	-0.2707	0.0466	-0.0489	-0.0148	0.2996	0.2379	-0.429	0.2815
BP0372	glutamyl-tRNA(GLN) amidotransferase subunit A	-0.103	-0.3214	0.3564	-0.2981	-0.117	-0.5925	-0.8021	-0.3936	-0.2222	-0.3748	-0.2043	0.2	0.105	0.1269	-0.2314	-0.538	-0.208	0.0928	-0.1326	-0.7327	-0.0736	-0.7418	-0.4703	0.1054	0.1479	-0.1018	0.0129	-0.1126	0.2461	-0.1558	-0.0085	0.3901	-0.3113	-0.4998	0.159	-0.2746	-0.2665	0.1146	-0.0985	-0.0765	-0.3831	0.2854	0.0379	-0.4128	0.6182	0.6247	-0.2068	-0.0443
BP0373	glutamyl-tRNA(GLN) amidotransferase subunit C	-0.047	-0.2062	-0.3206	0.2055	-0.2308	-0.554	-0.5899	0.065	-0.1222	-0.6817	-0.1129	0.107	0.0492	0.1769	-0.0414	-0.1324	0.3306	-0.2036	-0.0297	-0.8126	-0.0705	-0.115	0.0043	0.5389	0.0178	0.065	0.088	0.3809	0.1837	-0.2089	-0.1011	-0.1178	-0.1926	-0.796	-0.095	-0.1232	-0.1481	-0.0297	-0.0675	0.2802	-0.0921	0.2563	-0.0088	-0.2451	0.6257	0.1151	-0.464	0.3831
BP0374	rod shape-determining protein	0.0342	-0.0131	-0.0927	0.0629	0.2814	-0.2914	-0.3212	0.0775	-0.0311	0.3256	0.2101	0.202	0.3414	0.3061	0.0374	0.3505	0.1906	0.1976	0.2125	-0.4165	0.0715	-0.0427	0.1307	0.4909	0.0994	-0.063	0.2376	0.3016	0.4953	0.2858	0.4419	0.036	0.2715	-0.1608	0.1881	0.2342	0.2611	0.3394	0.1351	0.39	0.1231	0.2375	0.2731	-0.0185	0.2134	0.1466	0.4226	0.4411
BP0375	rod shape-determining protein	0.2876	-0.0261	0.2122	0.0813	0.2757	0.0583	0.1162	-0.093	0.0077	-0.247	0.4387	0.0829	0.0369	0.0355	0.1022	0.2233	0.1938	0.1429	0.0968	-0.0379	-0.0169	0.1567	0.9014	0.6084	0.1764	0.5733	0.3314	0.3862	0.1082	0.0577	0.6349	0.1094	-0.0587	0.1455	0.0789	-0.1915	0.1893	0.2825	-0.1424	0.3323	0.1735	0.1222	0.3183	0.1134	0.3848	0.4419	0.2584	0.3547
BP0376	rod shape-determining protein	0.2568	0.1875	0.1569	-0.1082	0.2249	-0.4081	-0.4898	-0.4708	-0.1871	0.0385	0.0287	0.4272	-0.0739	0.278	0.2556	0.2534	-0.042	0.3622	0.0108	0	0.2131	0.1116	-0.0203	0.1493	0.1669	-0.01	0.3188	0.099	0.3969	0.0165	0.3185	0.474	0.0941	0.0959	0.281	0.0606	0.3232	-0.1042	-0.1047	-0.0758	-0.0526	0.4645	0.2581	0.1862	0.5813	0.7278	0.3257	-0.1024
BP0377	penicillin-binding protein 2	0.3147	0.0436	-0.1265	0.2296	0.1058	-0.4805	-0.6061	-0.1265	-0.2836	-0.2806	0.1701	0.2504	0.1348	0.1946	0.2985	1.4629	0.2964	0.0734	0.0074	0.0777	0.0321	0.17	0.1261	0.6415	0.1915	0.2105	0.336	0.5616	0.1497	-0.0986	0.3254	0.4437	0.0973	0.1015	0.0016	0.0944	0.3641	0.0588	-0.0254	0.3291	0.2114	0.2641	0.2176	0.2403	0.5571	0.5742	-0.0979	0.3449
BP0378	rod shape-determining protein	0.4918	0.0637	1.8862	-0.8432	0.0083	-0.0412	0.27	-0.9516	-0.5994	-0.6699	1.1253	0.2525	0.4331	0.2086	0.0235	-0.6822	-0.5138	-0.0021	-0.5451	0.6705	-0.1189	-0.7329	0.0503	-0.1842	-0.0476	0.8668	-0.0205	-0.5475	0.0874	-0.1648	1.3747	0.3203	-0.5721	0.5058	0.7401	-0.4057	0.0824	0.0818	0.2851	-0.4739	-0.5576	0.4776	-0.4332	0.2044	0.628	1.7069	0.4778	-0.39
BP0379	putative L-lactate dehydrogenase	-0.7218	-0.4056	-0.9061	-0.0046	-0.3246	-1.3123	-1.3199	-0.2141	-0.7473	-0.7554	-0.3605	-0.248	-0.1491	0.0131	-0.3113	-0.0689	0.2089	-0.1779	-0.3403	-0.977	-0.4827	-0.1595	0.7238	0.7092	-0.3962	-0.0977	-0.1127	0.4462	-0.8938	-0.637	0.0422	0.2709	-0.2304	-0.9099	-0.3458	-0.175	-0.1659	0.0167	0.0569	0.6582	0.3571	0.1232	0.0964	0.5421	0.7412	0.3543	0.0369	0.5874
BP0380	putative Sodium:sulfate symportert	-0.8845	-1.0906	-0.6647	-0.6261	-0.6058	-1.4246	-1.2732	-0.488	-0.6463	-1.3356	-0.3785	-0.0612	-0.194	-0.385	-0.4004	-0.0281	-0.2181	-0.439	-0.4271	-0.432	-0.6674	-0.7339	-0.073	0.1127	-0.7658	-0.3314	-0.3788	-0.1598	-1.0085	-0.4198	-0.0547	1.2538	-0.5952	-0.4643	-0.417	-0.2522	-0.7398	-0.2661	0.0054	0.2123	-0.3054	0.0867	-0.142	0.4576	1.4896	1.4456	-0.6106	0.0776
BP0381	putative TetR-family transcriptional regulator	-0.1014	0.1323	0.0641	0.1685	0.1306	-0.4127	-0.465	0.017	-0.2879	-0.2988	0.2002	0.072	-0.0522	0.1881	0.1569	0.2689	0.1636	0.0839	0.0736	-0.251	0.0026	0.2173	0.4768	0.5665	0.0034	-0.0426	0.1772	0.3356	-0.1132	0.0166	0.2187	0.5213	0.066	-0.2763	-0.0856	0.1664	0.3094	0.1235	0.0037	0.3275	0.1474	0.0686	0.0253	0.5664	0.5734	0.5639	-0.1837	0.3111
BP0382	putative hydrolase	0.2229	0.0952	-0.4033	0.216	0.0139	-0.1466	-0.3958	0.0576	-0.2286	-0.3835	0.3364	0.2326	0.0623	0.2098	0.2367	0.1714	0.2923	0.013	0.1636	0.2385	-0.0747	-0.0455	0.2617	0.4552	0.0993	-0.1259	0.0529	0.2828	0.284	0.1374	0.3955	0.4107	0.2104	0.029	0.0815	0.2536	0.0959	0.2203	0.0566	0.2258	0.1718	0.2772	0.0642	0.3172	0.7993	0.5791	0.2121	0.3919
BP0383	acetylglutamate kinase	-0.1095	0.0262	0.3991	-0.3339	-0.0062	-0.3141	-0.2581	-0.3291	-0.2947	-0.3093	0.0004	0.1525	0.2743	0.1021	-0.0103	0.1919	-0.2641	0.0587	-0.0802	-0.0276	-0.2048	-0.3833	-0.2183	0.0195	-0.1945	-0.1297	-0.0043	-0.0897	0.1067	-0.1581	-0.0652	0.3183	-0.1003	-0.0181	0.0891	-0.0289	0.136	0.1812	0.1529	0.0874	-0.1821	0.1249	-0.1607	0.167	0.4595	0.7063	-0.2626	0.0468
BP0385	putative exported protein	-0.0052	-0.1027	-0.2425	-0.1113	-0.0733	-0.1828	0.153	0.2372	-0.0493	-0.6764	0.1789	-0.0365	0.2102	0.149	-0.0759	-0.6431	0.149	0.052	0.2808	0.0417	-0.1272	-0.1907	0.2425	0.325	-0.0111	0.1426	0.1012	0.4835	-0.0447	0.1405	-0.023	-0.7908	0.1062	0.0574	-0.1502	0.0243	0.32	0.3629	0.2037	0.3898	0.0552	0.1637	0.0521	0.1638	-0.229	-0.2831	-0.3565	0.6358
BP0386	putative thioredoxin	-0.064	0.1102	-0.1445	0.0255	0.039	-0.4186	-0.5438	-0.2251	-0.4418	-0.1419	0.0362	-0.1146	0.0696	0.0225	0.0317	-0.0505	-0.0404	0.1669	-0.1723	-0.8893	-0.5799	-0.1899	0.1703	0.3491	-0.0175	-0.2094	0.0779	0.171	0.155	0.0054	0.2742	0.1551	0.0335	-0.8915	-0.1999	-0.2207	0.1952	0.093	-0.0067	0.106	-0.2934	0.171	-0.1854	0.4073	0.563	0.5554	0.2417	0.0829
BP0387	putative exported protein	0.095	0.1155	0.1233	-0.2058	-0.1033	-0.4976	-0.6639	-0.4081	-0.5266	-0.6322	0.1393	0.0406	0.1908	0.1344	-0.0483	-0.0643	-0.1404	0.0207	-0.0426	-0.2968	-0.3873	-0.4641	-0.3258	0.2463	-0.1617	-0.1485	0.0453	0.1812	0.1499	0.2236	0.1255	0.2402	0.0154	-0.3477	-0.0613	0.0563	0.0437	-0.0085	-0.0224	-0.0033	-0.3171	0.2054	-0.3067	0.1339	0.3447	0.5346	-0.4065	0.1539
BP0388	probable phosphosugar isomerase	-0.0942	0.0395	0.0041	0.2173	0.1332	-0.5402	-0.4156	0.0237	-0.1896	-0.256	0.0781	0.2709	0.2056	0.1354	-0.0294	0.3057	0.3149	0.0981	0.1604	-0.1953	-0.1149	-0.0731	0.3878	0.5832	0.0504	0.1421	0.1225	0.3959	0.1603	0.2874	0.3046	0.1193	0.0229	-0.176	0.1495	-0.091	0.2259	0.3148	-0.1055	0.3874	0.1642	0.0852	-0.0128	0.3128	0.3352	0.3401	-0.324	0.5673
BP0389	conserved hypothetical protein (Pseudogene)	0.2655	-0.2991	-0.0494	-0.2309	0.1471	-0.2579	-0.407	-0.0985	0.1052	-0.2616	0.1711	0.2699	0.0168	0.8599	0.349	0.2658	0.0478	0.3526	0.1137	0.0272	-0.0067	0.0046	-0.0412	0.1536	0.1176	-0.017	0.1401	-0.3863	0.4469	0.7665	0.3179	0.5612	0.2746	0.0561	0.2841	0.2893	-0.2276	0.0977	-0.0147	0.017	0.1136	0.6325	0.2999	-0.2169	0.6713	0.5121	0.406	-0.2723
BP0390	putative tetrapyrrole methylase	0.0165	-0.1701	0.547	-0.209	0.1212	-0.4254	-0.4687	-0.2788	-0.1689	-0.2512	0.1439	0.07	-0.027	0.2473	-0.088	-0.0683	-0.1	0.2343	0.0812	-0.2334	-0.0239	-0.3604	-0.2544	0.1696	0.2231	0.1518	0.1708	-0.0454	0.3028	0.1222	0.3479	0.4599	-0.0654	0.1258	0.2935	-0.0751	0.1086	0.1796	0.023	-0.0951	-0.221	0.2972	0.2032	0.315	0.5644	0.6978	-0.042	0.1115
BP0391	methylated-DNA--protein-cysteine methyltransferase	0.071	0.0452	-0.0563	0.2664	0.0274	-0.47	-0.7531	-0.3287	-0.2271	-0.298	0.0698	0.244	-0.158	0.295	0.176	0.5198	0.172	-0.1324	-0.0089	-0.2704	0.0016	-0.3973	-0.113	0.4113	-0.0284	0.023	0.0171	0.1375	0.3878	-0.1995	0.0151	0.2971	-0.1359	0.0024	0.2401	-0.1368	-0.119	-0.0503	-0.3106	-0.0201	-0.0773	0.413	0.0492	0.1815	0.5172	0.3259	-0.2277	0.0357
BP0393	putative membrane protein (Pseudogene)	0.2085	-0.5838	-1.6315	-0.1371	-0.1689	-0.4375	-1.4057	-0.6706	-0.6818	0.0939	0.3273	0.7033	-0.0747	0.2369	0.9696	-0.0646	0.6097	-0.6607	-0.6053	-0.1021	-0.2098	-0.6267	0.1087	0.3874	-0.2854	-0.1942	-0.584	-0.189	0.6035	-0.3851	-0.4134	0.2182	0.1684	-0.0237	0.3631	-0.142	-0.5239	-0.7086	-0.7259	-0.291	-0.4818	1.0003	-0.1716	-0.7692	1.1294	0.3286	-0.8324	-0.1819
BP0394	putative membrane protein	0.1048	0.0232	0.1212	0.4742	-0.164	-0.5265	-0.2334	-0.0646	0.0984	-0.3565	0.2852	0.1753	0.1261	0.4706	0.2108	0.0828	0.1126	0.5309	0.5182	-0.113	0.4466	0.0821	0.2897	0.611	0.3357	0.4012	0.6579	0.346	0.5265	0.6144	0.88	0.5636	0.0365	-0.0258	0.5441	0.1253	0.418	0.1287	0.1948	0.3804	0.0482	0.4297	0.6896	0.301	0.9352	0.8307	-0.24	0.4418
BP0395	putative exported protein	0.1356	0.2201	0.4299	0.2928	0	-0.6576	-0.4524	0.3797	0.463	0.1305	0.093	0.3386	0.4293	0.4817	-0.0639	0.7477	0.2956	0.9994	0.7779	0.1097	-0.1185	-0.4347	0.4656	0.8668	0.658	0.8907	0.7228	1.1889	0.0206	-0.2897	-0.6006	0.8303	0.6859	0.3691	0.616	0.3941	0.4665	0.7247	0.5407	1.0168	0.3292	0.8377	0.462	0.6622	1.0456	1.0352	0.1036	1.3359
BP0396	putative membrane protein	0.3737	0.1702	-0.2767	0.5692	0.4623	0.3088	0.1268	0.6389	0.4379	-0.0886	0.3373	0.5036	0.4016	0.3815	0.5748	0.3725	0.5084	0.0394	0.3594	0.4133	0.2775	0.1704	0.5502	0.5724	0.2666	0.5439	0.5235	0.6215	0.6225	0.4006	0.8769	0.439	0.4157	0.2555	0.2694	0.3521	0.1662	0.1552	-0.2485	0.3656	0.1106	0.3144	0.3377	0.2176	0.6814	0.4021	0.0685	0.3641
BP0397	conserved hypothetical protein	0.2147	0.3461	0.5284	-0.0763	-0.022	0.6487	0.498	0.5205	0.7015	-0.0982	0.1797	-0.0839	0.0582	0.1537	0.2298	0.7387	0.1803	0.6541	0.2636	0.2441	0.4737	0.4675	0.268	0.3227	0.6618	0.5982	0.9023	0.6562	0.2193	0.4512	0.9863	0.4134	0.2094	0.1015	0.3525	0.2141	0.0103	0.2285	0.0992	-0.2094	0.202	-0.0436	0.0946	0.2348	0.3143	0.6617	-0.1935	0.2101
BP0398	putative membrane protein	0.2128	-0.384	-0.0696	-0.0057	0.3508	0.8326	0.5021	0.9888	1.1708	0.0654	0.2162	0.5166	-0.2439	0.2304	0.4259	0.5954	0.5143	0.4921	0.3083	0.9302	0.651	0.2137	0.4272	0.2909	0.47	0.4303	0.368	0.5218	0.4828	0.6302	1.2671	0.6666	0.1319	0.6405	0.4631	0.2263	-0.0482	-0.104	-0.1352	0.0421	0.1128	0.2765	0.1931	0.108	0.7312	0.663	0.4137	0.226
BP0399	putative glycosyl transferase	0.2011	-0.2791	0.0349	-0.255	0.0137	0.4401	0.0496	0.7207	0.9422	-0.3089	0.1279	0.291	0.0603	0.119	0.3787	-0.5489	0.478	0.1946	0.351	0.3188	0.4881	-0.119	0.0198	0.4087	0.2709	0.4303	0.6362	0.5817	0.4097	0.2843	0.7445	0.4679	0.1732	0.2861	0.253	0.2725	-0.3162	-0.2321	0.0452	0.146	-0.1762	0.1987	0.2324	-0.1188	0.5654	0.5194	-0.0663	0.0639
BP0400	putative acetyltransferase (pseudogene)	-0.0946	-0.1246	-0.2981	0.2321	-0.1858	-0.3379	-0.326	0.5658	0.4821	-0.4765	0.009	0.0192	-0.2565	0.3125	-0.0214	-0.397	0.2779	-0.0659	-0.1711	-0.8649	0.022	0.136	0.676	0.6355	0.0945	0.2316	0.0401	0.2946	0.5627	0.3289	0.847	-0.0095	-0.1705	-0.4968	0.2439	-0.132	0.0142	-0.1545	-0.0721	0.4268	0.2576	0.0489	0.2223	-0.159	-0.1014	-0.3855	-0.0082	0.4464
BP0401	transposase (Pseudogene)	0.3694	-0.845	-1.1924	-1.0135	-0.223	-1.0324	-1.3234	-0.993	-1.1287	-0.5714	0.0233	0.4843	-0.5929	-0.1338	0.3951	-0.2279	-0.0212	-0.7876	-0.6758	-1.0676	-0.7878	-0.9165	0.018	0.0521	-0.6472	-1.0948	-1.1786	-1.1397	0.3025	-0.8551	-0.2934	0.5914	-0.672	-0.5232	0.1442	-0.5355	-0.4448	-0.7594	-0.9715	-1.1119	-0.908	0.0983	-0.9407	-0.4839	0.8501	0.2472	-1.1128	-1.138
BP0402	putative sodium/glutamate symport carrier protein	-0.0269	-0.3412	-0.0607	-0.5861	-0.3593	-0.4797	-0.5415	-0.5788	-0.284	-0.3257	-0.0189	0.1197	-0.0953	-0.0624	-0.0851	-0.1534	-0.488	-0.0387	-0.0896	-0.5491	-0.218	-0.5578	-0.6728	-0.2678	-0.1996	-0.279	-0.1992	-0.4589	0.0621	-0.0685	-0.0394	0.4661	-0.1408	-0.085	0.0829	-0.0955	-0.1471	-0.2148	-0.4552	-0.4437	-0.6131	0.279	-0.1501	-0.0925	0.6598	0.5036	-0.1309	-0.3269
BP0403	putative exported protein	0.0461	-0.0088	0.0288	-0.0492	0.0222	-0.3482	-0.4332	-0.0195	-0.0008	-0.1985	0.2949	0.1494	0.1649	0.1513	-0.144	0.4413	0.0417	-0.0885	-0.096	-0.4391	-0.1247	-0.1171	-0.0405	0.2267	-0.0273	-0.0498	0.01	0.1168	0.1221	-0.1078	0.3672	0.3907	0.1224	-0.1623	0.181	0.0593	-0.0763	0.1551	-0.1739	0.1511	0.0397	0.2872	0.1016	0.1731	0.6231	0.6406	0.0486	0.2052
BP0404	putative short-chain fatty acids transporter	0.0835	-0.3209	-0.3347	-0.3902	-0.3583	-0.1715	-0.3156	-0.1708	-0.2358	-0.7949	0.2221	0.1168	-0.14	-0.1271	0.1795	-0.6395	0.3949	-0.4155	-0.6667	-0.0034	-0.1802	-0.3824	0.4286	0.2839	-0.3623	-0.3472	-0.3938	-0.171	-0.1486	-0.4881	0.3511	0.3321	-0.4368	-0.0325	0.0275	-0.2838	-0.2404	-0.2574	-0.4072	-0.2606	-0.1029	0.024	-0.201	-0.0196	0.5434	0.3933	-0.5195	-0.1187
BP0405	putative membrane protein	-1.1467	-1.4363	-1.2291	-1.3773	-1.3272	-1.4393	-1.6406	-0.6354	-0.6283	-0.8777	-0.9275	-1.1166	-0.703	-1.0116	-0.3721	0.1264	-0.4971	-1.2166	-1.4996	-1.7573	-0.9406	-1.0756	-0.2029	-0.2029	-1.1517	-1.4981	-0.5419	-0.5332	-0.7729	-0.5768	-0.4694	1.552	-1.3108	-1.6757	-1.1032	-1.0022	-0.9693	-1.2409	-1.2494	-1.4179	-0.7795	-0.6726	-0.8608	1.2126	1.6024	1.7114	-1.0187	-1.2977
BP0406	DNA polymerase III, epsilon chain	0.0928	0.0079	-0.1904	0.4989	0.0948	-0.2076	-0.2507	0.661	0.2515	-0.3852	0.1139	0.0978	0.2155	0.2366	0.2163	0.1914	0.3957	0.0369	0.1138	-0.2322	0.1263	0.1443	0.5246	0.6219	-0.0284	0.2132	0.2073	0.7498	0.072	0.1469	0.5144	-0.255	0.1772	-0.2535	0.0523	-0.014	0.1032	0.2259	0.0713	0.7812	0.362	0.2719	0.0058	0.1705	0.0065	-0.2767	-0.0803	0.7616
BP0407	probable membrane protein (Pseudogene)	0.0741	-0.2429	0.1428	-0.129	-0.0569	-0.2947	-0.21	0.0554	-0.1113	-0.2611	0.3645	0.4361	0.1351	0.1877	0.5657	-0.9504	0.2978	0.3516	-0.0156	0.0074	-0.1077	-0.1769	0.1853	0.4678	0.2686	-0.1746	0.125	0.3905	0.1869	-0.0583	0.6191	0.4732	0.3686	0.2254	0.4142	0.1777	-0.0551	0.0484	0.1417	0.4621	-0.0947	0.3043	0.2561	0.2029	0.6851	0.8616	0.0309	0.459
BP0409	N-terminal region of elongation factor G (Pseudogene)	-0.0491	-0.1869	-0.8671	-0.1198	-0.2448	-0.5337	-0.4033	-0.2552	-0.6273	-0.9503	-0.0402	-0.1634	0.0814	-0.2348	-0.1014	-1.2008	-0.1096	-0.5995	-0.4723	-1.3111	-0.542	-0.605	-0.173	0.0614	-0.549	-0.6303	-0.4317	-0.2815	-0.0783	-0.2733	0.1757	0.7695	-0.5641	-1.1702	-0.4556	-0.6416	-0.2872	-0.3862	-0.4998	-0.1989	-0.406	-0.0979	-0.5117	0.2006	0.8115	0.6843	-0.8499	-0.1452
BP0410	putative universal stress protein	-1.1771	-1.086	-0.6208	-1.5119	-1.1791	-1.2928	-1.3897	-1.2051	-0.8474	-0.6733	-0.9149	-0.6592	-0.3817	-0.9632	-0.5382	-0.6937	-0.9693	-0.8935	-1.6157	-2.32	-1.2369	-1.5942	-1.0906	-0.3495	-1.4833	-1.6536	-0.4022	-0.9088	-0.6259	-0.3203	-0.3493	1.4932	-1.1923	-1.8164	-1.0939	-0.8844	-1.1573	-1.3544	-1.5976	-1.6949	-1.4493	-0.6554	-1.0148	1.1614	1.4482	1.7937	-1.0021	-1.5758
BP0411	conserved hypothetical protein	-0.1589	-0.5448	-1.0356	0.0505	-0.4672	-0.9231	-0.9329	0.2931	-0.1794	-0.8854	-0.3025	-0.2755	-0.3663	-0.1648	-0.5043	-0.2102	0.0108	-0.6613	-0.4739	-1.0341	-0.3958	-0.3755	0.2459	0.3024	-0.3963	-0.2236	-0.2725	0.2182	-0.0732	-0.6755	0.0372	0.4815	-0.5306	-0.9402	-0.4998	-0.3474	-0.639	-0.4999	-0.5803	0.2075	-0.266	-0.0856	-0.2222	-0.0677	0.5027	-0.1261	-0.4105	0.1394
BP0412	putative GntR-family transcriptional regulator	0.3709	0.0751	-0.1847	-0.0178	-0.1577	-0.5163	-0.5198	-0.1775	-0.1049	-0.6325	-0.3378	-0.0323	-0.1752	0.0817	0.3736	-0.0973	-0.1955	0.1602	-0.1671	-0.583	0.0759	-0.1962	0.0446	0.355	-0.1066	-0.1828	0.558	0.1608	-0.2233	-0.2726	0.1341	0.396	-0.1274	-0.3656	0.1312	-0.1424	0.2315	0.4473	0.1701	0.1774	0.168	0.3127	0.0674	0.4091	0.6013	0.2999	-0.4254	0.0404
BP0413	C-terminal region of elongation factor G (Pseudogene)	-0.0583	-0.4087	-0.6886	-0.6496	-0.1626	-0.7327	-0.7195	-0.5671	-0.722	-0.6746	0.0368	0.4733	-0.2601	-0.137	0.4209	1.631	0.2338	-0.6776	-0.6319	-0.5929	-0.3632	-0.7921	0.2476	0.0585	-0.5082	-0.229	-0.6789	-0.6953	0.0811	-0.4484	-0.3297	0.4138	-0.4474	-0.3191	0.188	-0.2598	0.3657	-0.7251	-0.7282	-0.55	-0.9458	0.2862	-0.7238	-3.609	0.5747	0.5935	-0.8377	-0.137
BP0414	putative Mg(2+) transporter	0.3287	-0.1662	1.3871	-0.6885	-0.1007	-0.3025	-0.1851	-0.9137	-0.7209	-0.9057	1.1551	0.4078	0.2705	0.0398	0.0664	-0.0883	-0.2457	-0.2034	-0.5317	0.8547	-0.341	-0.619	0.07	-0.1785	-0.1738	0.837	-0.2892	-0.56	-0.152	-0.3299	1.1812	0.263	-0.7241	0.6186	1.0222	-0.5301	-0.1443	0.1585	0.2224	-0.2119	-0.3803	-0.0794	-0.5628	0.036	0.5384	1.4456	0.3301	-0.3563
BP0415	putative membrane protein	0.0289	-0.0541	-0.2315	-0.3078	0.0532	-0.4861	-0.706	-0.5444	-0.5601	-0.4107	0.0206	0.073	-0.2399	0.2021	0.1586	-0.1183	-0.1252	-0.0242	-0.2013	-0.4351	-0.1245	-0.2842	-0.0487	-0.0047	0.03	-0.1538	-0.1073	-0.2116	-0.106	-0.6345	-0.284	0.3807	-0.0398	-0.2155	0.1047	-0.1006	-0.1385	0.0304	-0.3219	-0.1297	-0.0062	0.409	-0.1455	0.3072	0.7796	0.4893	0.0009	-0.3207
BP0416	conserved hypothetical protein	0.1731	-0.5261	-0.3774	-0.2626	0.0412	-0.3712	-0.7191	0.4149	-0.1504	-0.2629	-0.0928	0.3986	-0.3611	0.1817	0.6636	0.2731	0.0491	-0.0884	-0.2167	-0.6247	-0.2208	-0.2944	0.0439	0.2027	-0.1513	-0.023	-0.2008	-0.0978	0.0082	-0.5166	-0.3181	0.3863	0.0311	-0.3079	0.4523	0.1848	-0.2397	-0.323	0.2158	0.2556	0.1292	0.2717	-0.2382	-0.0572	0.678	0.4742	0.3355	0.2682
BP0417	probable enoyl-CoA hydratase	0.4836	-0.336	-0.3456	-0.2205	-0.0715	-0.5679	-0.4634	-0.1475	-0.7211	-0.205	0.0785	0.1701	-0.2092	0.2029	0.3732	-0.0072	-0.0627	-0.2695	-0.0426	-0.0545	-0.2385	-0.4535	0.1334	0.15	-0.0625	-0.1779	-0.247	-0.0429	-0.2026	-0.3891	0.0719	0.4152	-0.1858	0.0345	0.278	0.0233	0.0678	-0.0294	-0.3021	-0.2804	-0.1632	0.3926	-0.4289	0.0858	0.6018	0.0492	-0.0945	-0.2249
BP0418	putative exported protein	0.45	-0.0657	-0.3789	-0.3039	0.1286	-0.7859	-0.8847	0.462	-0.4919	-0.5401	-0.0331	0.2025	0.0012	0.0862	0.2521	-0.1181	0.0278	0.0339	-0.2204	-0.5015	-0.1412	0.0992	-0.2949	0.1456	0.2255	0.3797	0.346	0.2173	-0.0686	-0.5639	0.3541	0.0665	-0.2716	-0.3512	0.0781	-0.1771	-0.1638	-0.3587	-0.24	-0.1555	-0.3089	0.2038	0.0173	-0.306	0.7235	0.4434	-0.0808	-0.1426
BP0419	LysR-family transcriptional regulator	-0.3748	-0.2094	-0.3236	-0.4994	-0.2376	-0.578	-0.7775	-0.6521	-0.543	-0.4101	-0.3024	-0.1597	-0.4013	-0.1258	-0.2394	0.1175	-0.538	-0.1141	-0.2948	-0.4037	-0.4641	-0.3063	-0.3817	-0.3518	-0.2745	-0.3835	-0.3837	-0.1738	-0.1514	-0.3181	-0.1693	1.1595	-0.0873	-0.2372	-0.2113	-0.1696	-0.2736	-0.1867	-0.3725	-0.3629	-0.3548	-0.0325	-0.3271	0.0489	1.157	1.31	0.0276	-0.326
BP0420	probable acyl-CoA dehydrogenase	0.0163	-0.4794	-0.2876	-0.1822	-0.2849	-0.3693	-0.7114	-0.3326	-0.446	-0.4135	0.0911	0.1582	-0.1858	0.0299	0.1745	0.266	0.1579	-0.2366	-0.0774	-0.4325	-0.3199	-0.6352	-0.1204	0.3417	-0.1166	-0.2104	-0.3201	-0.072	0.1757	-0.3128	0.2648	0.3515	-0.1792	-0.0765	0.191	-0.0183	-0.1586	-0.4604	-0.205	-0.0658	-0.2397	0.2292	-0.1805	0.0275	0.6211	0.3236	-0.4459	0.0667
BP0421	putative acyl-CoA dehydrogenase	0.0738	-0.5751	-0.925	-0.9534	-0.2686	-0.6412	-1.0974	-0.7891	-0.718	0.3975	-0.1695	0.391	-0.0762	0.4424	0.424	-0.0056	-0.133	-0.4279	-0.7937	-0.8327	-0.2229	-0.448	-0.1989	-0.2415	-0.4974	-0.3695	-0.9329	-0.72	0.3615	-0.8471	-0.6317	0.3295	-0.591	0.0437	-0.087	-0.2395	-0.4395	-0.7206	-1.2788	-0.8595	-0.38	0.532	-0.5246	-0.8075	0.6615	0.484	-0.4419	-0.9155
BP0422	probable thiolase	0.1595	-0.1478	-0.0847	-0.0502	-0.2269	-0.7399	-0.245	-0.0489	-0.3721	-0.137	0.1059	-0.0552	0.1191	-0.0247	-0.0857	-0.0503	-0.1276	-0.0199	-0.2845	-0.2823	-0.1217	-0.0613	-0.116	0.2372	-0.1671	-0.0307	0.1314	0.2224	-0.0785	-0.0285	0.0567	0.1951	0.3089	-0.0056	-0.0783	-0.0353	-0.1235	0.2614	-0.0141	0.198	-0.3918	0.0516	-0.1666	0.4329	0.288	0.6101	0.3968	0.1057
BP0423	putative fatty acid CoA ligase (Pseudogene)	-0.1388	-0.1893	-0.7309	-0.9	-0.4367	-0.4203	-0.3782	-0.4474	-0.6672	-0.4821	-0.0849	-0.437	-0.1546	-0.3668	-0.1161	0.0876	-0.5222	-0.4842	-0.6137	-0.2464	-0.8175	-0.1522	0.0292	0.0934	-0.3041	-0.3773	-0.5325	-0.5219	-0.4498	-0.3876	0.1631	-0.3611	-0.2698	-0.2688	-0.3872	-0.3576	-0.2174	-0.1944	-0.9408	-0.6568	-0.5796	-0.5603	-0.8501	-0.3108	-0.0518	0.0857	-0.9557	-0.582
BP0425	probable LysR-family transcriptional regulator	0.208	0.0996	0.4553	-0.0817	0.0643	-0.2301	-0.3067	-0.1774	-0.1491	-0.4069	0.2636	0.2592	0.1906	0.2153	0.0638	-0.4486	-0.1336	0.2831	0.0734	-0.2206	-0.0199	-0.2345	0.031	0.2041	0.252	0.3047	0.1678	-0.06	0.1244	-0.0203	0.1904	0.6151	0.2678	0.015	0.4016	0.0535	0.0422	0.2359	0.0002	0.1444	-0.048	0.225	0.014	0.2743	0.6545	0.7575	-0.2489	0.2028
BP0426	cold shock protein	0.0587	-0.1002	0.0462	-0.2209	-0.1459	-0.2612	-0.1716	-0.5025	-0.7285	-0.4612	-0.0513	-0.0249	-0.0171	-0.2454	-0.1077	-0.047	-0.3811	-0.5665	-0.3976	-0.4472	-0.3856	-0.2503	-0.5134	-0.0857	-0.188	-0.5693	-0.479	-0.2777	-0.0619	-0.1552	-0.1835	1.0227	-0.255	-0.391	-0.4916	-0.3396	-0.0979	-0.3205	-0.5855	-0.5459	-0.4342	-0.2952	-0.584	0.2146	1.2807	1.3264	-1.0469	-0.2902
BP0427	putative exported protein	0.2501	-0.7262	-0.3966	-1.0938	0.0132	-1.1419	-1.4444	-1.1431	-1.059	-0.0768	-0.0866	0.3061	-0.0835	0.082	0.3713	-0.7526	-0.2405	-0.6171	-0.33	-0.3522	-0.5726	-0.7954	-0.5318	-0.4689	-0.5519	-0.6683	-0.9582	-0.9501	0.2775	-0.2207	-0.2557	0.2372	-0.4823	0.0839	0.32	-0.4598	-0.2754	-0.682	-0.8332	-1.1191	-0.8826	0.3983	-0.4907	-0.2628	0.9258	0.9078	-0.8584	-1.2236
BP0428	putative GntR-family transcriptional regulator	-0.6027	-0.3342	-0.4363	-0.4644	-0.3399	-0.9247	-0.9171	-0.4522	-0.751	-0.8924	-0.6001	-0.5211	-0.2529	-0.3296	-0.4772	-0.1899	-0.4894	-0.4007	-0.5164	-0.9398	-0.7116	-0.6188	-0.4161	0.0595	-0.6817	-0.6422	-0.4596	-0.2676	-0.5732	-0.5193	-0.3318	0.9152	-0.3889	-0.5878	-0.2771	-0.3917	-0.6457	-0.3763	-0.3013	-0.0956	-0.4023	-0.5134	-0.3538	0.2073	1.0314	1.0012	-0.5326	-0.0742
BP0429	delta-1-pyrroline-5-carboxylate dehydrogenase precursor	0.1907	-0.1052	-0.9176	-0.7733	-0.3492	-0.9621	-1.2952	-0.5406	-0.5711	-0.4799	-0.1246	0.0364	-0.1562	0.0103	0.402	-0.2773	-0.2946	-0.3639	-0.1422	-0.371	-0.683	-0.6276	-0.3276	-0.147	-0.5918	-0.9975	-0.5896	-0.6626	0.3335	-0.0943	0.0484	-0.1724	-0.2676	-0.2416	0.0952	0.0443	-0.4288	-0.5395	-0.1746	-0.2533	-0.7861	0.38	-0.2625	-0.5169	0.7684	0.6085	-0.1044	-0.2652
BP0430	short-chain fatty acids transporter	0.2294	-0.8938	-0.9293	-1.0398	-0.3892	-1.2271	-1.7891	-0.9429	-0.5685	-0.8937	-0.0703	0.1644	-0.2434	-0.2369	0.3847	-0.2904	-0.3985	-0.5364	-0.4741	-0.6063	-0.782	-0.8801	-0.1675	-0.137	-0.7964	-0.8004	-0.6373	-0.8848	0.1155	-0.5575	-0.3291	-0.2621	-0.2407	-0.2041	0.0294	-0.3691	-0.5705	-0.4931	-0.5184	-0.2847	-0.7865	0.3304	-0.4731	-0.9472	0.7003	0.5336	-0.7102	-0.4306
BP0431	putative molybdopterin oxidoreductase	-0.373	-0.5109	-0.2233	-0.4019	-0.2469	-0.3549	-1.1908	-0.3647	-0.3373	-0.8554	-0.2096	-0.2215	-0.2806	-0.209	-0.3651	0.2406	-0.2831	-0.0599	-0.3059	-0.5251	-0.4673	-0.566	-0.0625	0.332	-0.3969	-0.3544	-0.3884	-0.0918	-0.3482	-0.3326	0.1473	0.8536	-0.1294	-0.2267	0.0409	-0.4456	-0.2127	-0.2738	-0.1421	0.2283	-0.162	-0.1073	0.0296	-0.1897	0.8863	1.211	-0.2391	0.0555
BP0432	conserved hypothetical protein	0.0416	-0.2662	0.1665	-0.4701	0.3863	-0.2458	0.0169	-0.3842	-0.5759	-0.2374	0.1811	0.2387	0.0886	0.0272	0.3468	0.8863	-0.2182	0.0254	-0.2009	-0.1243	-0.4238	-0.2863	-0.1917	0.0312	-0.1554	-0.2826	-0.0055	-0.2869	-0.3375	-0.5312	-0.1273	0.1256	-0.1864	0.1525	0.1271	-0.1132	-0.092	0.0966	0.1476	-0.3053	-0.3719	0.0738	-0.3955	-0.0346	0.5325	0.8203	-0.2358	-0.2081
BP0433	probable LysR-family transcriptional regulator	0.3956	0.0632	0.3192	-0.6731	0.0862	-0.0513	-0.0791	-0.3309	-0.2376	-0.4327	0.8408	0.1602	0.1426	0.0002	0.2672	0.3345	-0.2226	-0.0652	-0.2743	0.2093	-0.3512	-0.1577	-0.0957	0.1798	-0.0582	0.2708	-0.1087	-0.2642	0.1663	-0.0202	0.8958	0.1476	-0.1396	0.5677	0.5088	-0.1324	-0.0636	0.0832	-0.0089	-0.0437	-0.072	0.1491	-0.2401	0.0095	0.4053	0.6333	0.2364	-0.047
BP0434	putative exported protein (Pseudogene)	0.0305	-0.2704	-0.9308	-1.0022	-0.2979	-0.4566	-0.9272	-0.6386	-0.2867	-0.2383	0.2807	0.4525	-0.1839	0.2442	0.6562	0.3757	0.2672	-0.2586	-0.5927	-0.5517	-0.3132	-0.548	-0.1536	-0.2701	-0.115	-0.5325	-0.5911	-0.5221	0.5384	-0.322	-0.3317	0.3775	-0.3751	-0.1449	0.675	0.1208	-0.2387	-0.4122	-0.3945	-0.2834	-0.622	0.5634	-0.2286	-0.7255	0.9905	0.2038	-0.3457	-0.6594
BP0435	putative dehydratase/racemase	0.1925	-0.1779	0.0716	0.0343	0.1493	-0.4044	0.0645	0.1141	-0.423	-0.4171	0.4047	0.1368	0.4516	-0.1008	0.3185	-0.3086	0.1843	-0.2523	-0.5884	0.0218	-0.2975	-0.3883	0.0042	0.4158	0.1601	0.3326	-0.0929	-0.0026	-0.1333	-0.302	0.5311	0.8304	-0.226	0.0711	1.0023	-0.3768	0.1472	-0.0725	-0.1299	0.1997	-0.3414	0.2405	0.0463	0.1831	0.3206	0.7733	-0.0158	0.3424
BP0436	conserved hypothetical protein	0.5493	-0.3735	0.0068	-0.1229	-0.1834	-0.677	-0.6184	-0.3442	-0.5711	-0.494	0.1965	0.3219	-0.1678	0.1721	0.3477	0.5821	0.0882	-0.1122	-0.5454	-0.8928	-0.1461	-0.4598	0.0415	0.4624	-0.1806	-0.3161	-0.261	-0.1338	0.3224	-0.2622	0.0834	0.6182	-0.5006	-0.395	0.09	-0.28	-0.3432	-0.4558	-0.6978	-0.1687	-0.1314	0.4048	-0.0818	-0.4212	0.688	0.5093	-0.4952	-0.4822
BP0437	LysR-family transcriptional regulator	-0.0853	-0.0699	0.467	-0.4557	-0.0473	-0.0401	0.031	-0.4508	-0.4402	-0.4651	0.401	0.1197	0.1792	-0.1623	0.0643	-0.5871	-0.1109	-0.0658	-0.1316	0.1561	-0.2692	-0.2132	0.1826	0.0716	0.0131	0.0166	0.0529	-0.0618	-0.1853	-0.1277	0.5399	0.3288	-0.1177	0.3471	0.202	-0.1114	-0.0014	0.2071	0.0602	0.1262	-0.1159	0.0013	-0.1933	0.2595	0.6593	0.7951	0.1776	0.1506
BP0438	conserved hypothetical protein	0.1682	-0.0494	-0.2453	-0.0191	0.1959	-0.3778	-0.2102	-0.2109	-0.4862	-0.2687	0.058	0.1762	-0.0904	0.0922	0.1128	-0.6849	-0.0449	-0.3055	-0.3684	-0.4798	-0.3004	-0.3636	-0.0864	0.3253	-0.4111	-0.3748	-0.3292	-0.2752	0.1052	-0.4153	-0.114	0.8511	-0.0703	-0.3309	0.0828	-0.2129	-0.0391	-0.1411	-0.3185	-0.1256	-0.1023	0.2356	-0.3632	0.3119	1.2205	1.2589	-0.1199	0.1772
BP0440	N-terminal region of isovaleryl-CoA dehydrogenase (Pseudogene)	-0.4761	-0.5828	-0.6424	-0.4567	-0.7612	-0.4115	-0.6639	-0.3581	-0.5421	-0.578	-0.4652	-0.492	-0.6302	-0.4108	-0.4382	-0.7982	-0.4349	-0.7048	-1.0223	-0.9083	-0.5474	-0.5416	-0.2616	-0.0385	-0.6985	-0.8916	-0.6555	-0.3382	-0.4216	-0.7817	-0.5854	1.351	-0.4499	-0.6777	-0.5476	-0.8189	-0.4416	-0.4295	-0.6473	-0.2859	-0.4291	-0.6751	-0.6097	0.448	1.2182	1.5519	-0.6595	-0.2963
BP0441	MerR-family transcriptional regulator	-0.6083	-0.3366	-0.5496	-0.4059	-0.4206	-0.726	-0.8098	-0.0321	-0.1612	-1.1334	-0.3168	-0.3586	-0.2006	-0.1862	-0.1689	-0.2699	-0.2963	-0.3638	-0.5606	-1.0981	-0.5456	-0.3895	-0.1296	0.346	-0.3346	-0.6338	-0.0763	0.21	-0.1875	-0.5841	-0.4058	1.2999	-0.1949	-0.6146	-0.1795	-0.6167	-0.4278	-0.1497	-0.4243	0.1636	-0.141	-0.1938	-0.3055	0.3516	1.4917	1.3358	-0.7517	0.2625
BP0442	metallo-beta-lactamase family protein	-0.5794	-0.6883	-0.5348	-0.871	-0.4986	-0.5754	-0.5721	-0.5246	-0.468	-0.5409	-0.3508	-0.4915	-0.5992	-0.3886	-0.507	0.1115	-0.5586	-0.5996	-0.6034	-0.627	-0.7759	-0.8592	-0.5741	-0.2124	-0.6467	-0.6116	-0.616	-0.6531	-0.514	-0.4474	-0.2789	1.5922	-0.4338	-0.3243	-0.0863	-0.6434	-0.7167	-0.356	-0.4224	-0.4771	-0.6081	-0.5338	-0.5028	-0.0225	1.6786	1.6833	-0.2885	-0.4693
BP0444	C-terminal region of isovaleryl-CoA dehydrogenase (Pseudogene)	-0.1488	0.127	-0.0245	-0.3389	0.1568	-0.2568	0.1373	-0.3792	-0.6586	-0.5939	0.231	0.1266	0.0717	-0.228	-0.0996	-0.4016	0.0336	-0.3274	-0.4515	-0.2228	-0.4142	-0.2739	0.2679	0.2745	-0.1623	-0.4113	-0.1665	0.0071	-0.2309	-0.0721	0.2702	0.3989	-0.1964	-0.1499	-0.1449	-0.2814	0.0693	-0.0677	-0.2902	-0.1866	-0.1105	-0.2441	-0.4962	0.1619	0.4392	0.638	-0.7471	-0.008
BP0445	isocitrate dehydrogenase kinase/phosphatase (Pseudogene)	-0.0693	-0.5666	-0.2685	-0.5982	-0.19	-0.7023	-0.9096	-0.8965	-0.6256	-0.6502	-0.0857	0.1127	-0.3185	0.0255	0.0989	-0.1249	-0.3823	-0.4593	-0.4715	-0.418	-0.2365	-0.377	-0.2651	-0.1012	-0.2923	-0.5094	-0.4365	-0.8188	0.1364	-0.0743	-0.0493	0.1541	-0.4119	-0.2163	-0.0857	-0.3743	-0.3487	-0.3882	-1.0915	-0.6354	-0.8632	0.1683	-0.3659	-0.1729	0.254	0.2351	-0.1988	-0.1761
BP0447	acetyl-CoA acetyltransferase	0.1076	-0.202	-0.2069	-0.3143	-0.0233	-0.5326	-0.5287	-0.3892	-0.5466	-0.3466	0.2033	0.295	0.3343	0.0876	0.9773	-0.0625	-0.0035	-0.136	-0.1919	-0.386	-0.369	-0.3357	0.1371	0.363	-0.2602	-0.4053	0.1372	-0.0556	-0.0316	-0.4363	-0.1125	0.0902	0.0434	-0.0796	0.1129	0.0486	-0.2461	-0.05	-0.2448	-0.0076	-0.077	0.2823	-0.0988	-0.0926	0.6214	0.51	-0.1203	0.0197
BP0448	carboxyltransferase subunit of acetyl-CoA carboxylase	0.162	-0.515	-0.9324	-0.715	0.1215	-0.5605	-1.0029	-0.6259	-1.0071	-0.3765	0.1062	0.3891	-0.3823	0.124	0.5908	-0.1758	0.1074	-0.9188	-0.4145	-0.5801	-0.673	-0.798	-0.0762	-0.0702	-0.54	-0.8178	-0.8422	-0.9498	0.153	-0.8104	-0.2043	0.1226	-0.4315	-0.278	0.261	-0.2288	-0.3093	-0.6063	-0.9566	-0.4093	-0.8857	0.3933	-0.6173	-0.5926	0.8751	0.5386	-0.3497	-0.5411
BP0449	biotin carboxylase subunit of acetyl-CoA carboxylase	-0.1036	-0.0259	-0.1008	-0.3608	0.0861	-0.4131	-0.3501	-0.1464	-0.2873	-0.0624	0.2021	0.3827	0.0618	0.1393	0.0981	-0.0875	-0.2405	-0.0759	-0.1107	-0.5003	-0.2331	-0.5783	-0.0618	0.0649	-0.1179	-0.216	0.0775	-0.1052	-0.015	0.0877	0.1335	0.2023	-0.1232	-0.1454	0.0355	0.0046	0.1867	-0.0075	-0.1267	-0.2123	-0.3965	0.1219	0.1569	-0.0188	0.6318	0.3997	-0.0739	0.2807
BP0450	conserved hypothetical protein	0.0256	-0.1542	0.3512	-0.4001	-0.0251	-0.6418	-0.4733	-0.5196	-0.5213	-0.2329	-0.0144	0.1054	-0.0155	0.0941	-0.1717	0.1304	-0.1452	-0.0786	-0.4748	-0.7539	-0.1324	-0.5064	-0.0767	0.0583	-0.1585	-0.1457	-0.1743	-0.2269	0.0435	-0.4577	0.0233	0.2012	-0.4223	-0.2436	0.2221	-0.4306	-0.1163	0.0064	-0.1272	0.0588	-0.3957	0.2793	-0.081	0.078	0.3164	0.6482	-0.066	-0.0884
BP0451	succinylornithine transaminase	-0.0769	-0.242	-0.3905	0.0338	-0.2078	-0.2404	-0.3355	0.311	0.1055	-0.3751	-0.0003	-0.0665	-0.0282	-0.0995	-0.1784	-0.0508	0.1432	-0.1995	-0.04	-0.2165	-0.0551	0.0531	0.3078	0.3348	-0.2524	0.0079	-0.0401	0.2538	-0.2564	-0.3462	0.2491	-0.0952	0.0384	-0.1136	0.0268	0.1164	-0.1463	0.1633	-0.1642	0.379	0.1265	0.0032	0.0837	0.1162	-0.0253	-0.0323	0.1096	0.3952
BP0452	putative exported protein	-0.0335	0.0383	0.0089	-0.2849	-0.32	-0.1764	-0.3776	-0.3179	-0.3705	-0.2721	-0.048	-0.1122	-0.0542	-0.1015	0.124	-0.0266	-0.0454	-0.3562	-0.219	-0.4381	-0.1012	-0.1641	-0.0949	0.0109	-0.1276	-0.4037	-0.1135	-0.119	-0.4307	-0.5257	-0.4323	0.2207	-0.0238	-0.3141	0.0425	-0.1931	-0.0642	-0.0152	-0.3761	-0.0487	-0.081	0.1743	0.0355	-0.2251	0.5114	0.455	-0.4848	-0.0554
BP0453	low-specificity D-threonine aldolase	-0.1666	-0.0477	0.3724	-0.182	-0.1237	-0.2371	-0.3357	-0.0675	-0.2392	-0.2056	0.0906	-0.0458	0.2548	0.0762	-0.1775	-1.295	-0.2272	-0.1605	-0.2648	-0.3297	-0.1808	-0.243	-0.2542	0.2217	-0.2174	-0.2197	-0.0375	0.0152	0.1008	-0.1902	0.0177	0.7384	-0.0043	0.1335	0.267	-0.2054	-0.0647	0.0296	0.0412	0.1061	-0.3896	0.029	-0.1207	0.1819	0.5683	0.7632	-0.1288	0.1379
BP0454	putative exported protein	-0.6979	-0.6689	-1.2692	-0.4411	-0.7432	-0.3873	0.2178	0.1983	-0.2152	-1.2684	-0.6701	-0.7295	-0.1712	-0.2816	-0.7237	0.3282	-0.292	-0.858	-0.89	-1.7094	-0.0989	-0.4552	-0.5306	-0.1276	-0.6801	-0.8239	-0.4599	-0.3501	-0.6375	-0.9468	-0.2016	-0.4412	-0.6014	-1.3323	-0.5726	-0.484	-0.5374	-0.3227	-0.6355	-0.2169	-0.1444	-0.3508	-0.152	-0.5613	-0.4115	-0.8387	-0.85	-0.0693
BP0455	putative membrane protein	-0.0815	-0.1611	0.1025	-0.4298	-0.1138	-0.0724	0.1171	-0.0674	-0.0322	-0.3501	0.0466	0.0007	-0.0308	-0.0187	0.0976	0.352	-0.3127	-0.1258	-0.3901	0.2539	-0.1241	-0.0913	-0.1245	-0.0941	-0.1266	-0.3684	-0.1712	-0.2733	-0.4069	-0.5731	-0.3205	0.0023	-0.1095	0.3469	0.1082	-0.1497	-0.1779	-0.1201	0.0006	-0.1074	-0.0486	0.0573	0.1607	-0.1638	0.3352	0.4057	-0.1246	0.0079
BP0456	putative heme receptor	-0.3048	-0.0596	0.0088	0.0658	-0.2538	-0.0196	0.2694	0.4354	0.1496	-0.5372	-0.1067	-0.1014	0.1432	0.1757	0.4597	-0.8283	0.7304	0.1765	0.1658	-0.2616	0.578	0.746	0.9211	0.9548	0.1144	0.3031	0.6996	0.8516	-1.2619	-1.488	-1.213	0.4824	0.2471	-0.0584	0.2573	0.1032	0.4087	0.6158	0.3582	0.8633	0.9799	0.3964	0.7119	0.7577	0.4827	0.4147	0.1084	0.5786
BP0457	conserved hypothetical protein	-0.2997	-0.3097	-0.3366	-0.5191	-0.3642	-0.8741	-0.8525	-0.813	-0.8788	-0.421	-0.4226	-0.1921	-0.2628	-0.1266	-0.5129	-0.6	-0.681	-0.3492	-0.5168	-1.1525	-0.5651	-0.72	-0.9683	-0.4603	-0.4464	-0.6874	-0.4512	-0.5733	0.196	-0.3453	-0.1941	1.3743	-0.3766	-0.697	-0.2248	-0.5574	-0.611	-0.6075	-0.6196	-0.6389	-1.0245	-0.25	-0.5786	-0.0544	1.4354	1.2556	-0.542	-0.5866
BP0458	probable aminoacyl-tRNA synthetase (Pseudogene)	-0.2372	-0.5264	-0.5645	-0.1342	-0.1388	-0.851	-0.9849	-0.4224	-0.7106	-0.4778	-0.2552	-0.2509	-0.3742	-0.3043	-0.3534	0.5511	-0.3167	-0.5996	-0.8917	-0.9331	-0.6606	-0.5469	-0.5664	-0.2107	-0.545	-0.648	-0.5844	-0.2244	-0.1872	-0.4843	-0.2581	1.3985	-0.4566	-0.6338	-0.335	-0.6033	-0.5169	-0.6797	-0.7616	-0.3375	-0.7853	-0.356	-0.5354	0.0098	1.2268	1.0508	-0.4685	-0.2715
BP0459	putative membrane protein	0.2415	-0.1349	0.6685	-0.3808	0.2243	0.0601	0.3423	-0.3649	-0.0346	0.0013	0.4997	0.3262	0.0954	0.1936	0.225	-0.1176	-0.2976	0.1256	0.0413	0.4169	0.0068	-0.2475	-0.0187	0.0116	0.1854	0.4521	0.095	-0.2949	0.0224	0.0017	0.2281	0.5456	0.2351	0.6001	0.4325	-0.0796	0.2062	0.2595	0.1091	-0.1716	-0.0524	0.3031	0.18	0.2624	0.6875	0.8779	0.2336	0.0583
BP0460	DNA topoisomerase iii	0.0982	0.2579	0.0944	0.3347	0.3088	0.2192	0.0983	0.5641	0.2111	-0.1258	0.1994	0.1251	0.1134	0.3003	0.2577	0.1873	0.262	0.3315	0.0826	0.0332	0.0938	0.335	0.8455	0.8552	0.1318	-0.0196	0.131	0.5812	-0.0579	-0.1201	0.1422	0.183	0.4347	0.3776	0.3678	-0.0094	0.4105	0.5834	0.4029	0.546	0.7334	0.2308	0.3624	0.3761	0.1729	0.2703	0.1747	0.5465
BP0461	putative exported protein	0.3976	0.2656	0.3237	0.099	0.034	-0.0532	-0.4137	0.1354	0.0106	-0.4361	0.1503	0.1021	0.0964	0.1935	0.1464	-0.0267	0.1649	0.1846	0.0629	-0.1572	0.1426	0.2342	0.4827	0.4129	0.1949	0.2234	0.3424	0.483	-0.1986	-0.0306	-0.0902	0.4073	0.1348	0.118	0.3257	0.1997	-0.0002	0.1119	0.2439	0.2704	0.2368	0.1833	0.1385	0.2817	0.4898	0.689	-0.4052	0.4186
BP0462	ABC-transporter, ATP-binding component	-0.0741	0.0198	-0.0149	0.0771	-0.0904	-0.511	-0.1753	0.1663	-0.0519	-0.721	0.0056	0.2673	0.3065	0.1796	0.0178	0.1599	0.1598	0.0712	0.0918	-0.278	0.1091	0.0708	0.3975	0.621	0.2244	0.417	0.4624	0.5851	-0.1311	-0.2655	0.1505	0.2977	0.1168	-0.225	0.1989	0.0534	0.2007	0.3325	0.2476	0.7468	0.1822	0.2455	0.1693	0.0669	0.2736	0.3027	-0.2521	0.5508
BP0463	ABC transporter, permease component	0.1995	-0.0739	0.4947	-0.2671	0.1989	-0.6136	-0.795	-0.4462	-0.3208	-0.4533	0.0274	0.3862	0.0218	0.3999	0.472	-0.3279	-0.1289	0.2677	-0.02	-0.3385	0.2487	-0.1486	-0.3118	0.2267	0.1262	-0.0452	0.0505	-0.0408	0.0202	-0.1622	0.2253	0.1716	0.2921	0.0064	0.21	-0.1291	0.1122	-0.0646	-0.1177	0.0596	-0.3259	0.5208	0.2982	0.0075	0.4941	0.742	-0.1623	-0.1508
BP0464	gluconate 5-dehydrogenase	-0.0764	-0.0655	-0.404	-0.0177	-0.17	-0.5365	-0.4982	0.2456	-0.1773	-0.7775	0.0511	0.038	0.1266	-0.0631	-0.0771	1.0262	0.1506	-0.235	-0.1837	-0.766	-0.2862	-0.3349	-0.0463	0.2931	-0.2001	-0.2675	0.1657	0.2525	-0.3228	-0.4254	-0.132	0.6727	-0.076	-0.5416	-0.0349	-0.174	-0.2093	-0.0756	-0.0568	0.418	0.006	0.0534	-0.086	0.0944	0.6639	0.4987	-0.5621	0.3441
BP0465	probable aldehyde dehydrogenase	0.2145	-0.1071	1.6024	-0.6595	-0.2479	-0.1836	-0.1735	-0.7624	-0.3733	-0.5104	1.2339	0.2072	0.5236	-0.2703	-0.0142	0.0079	-0.1989	-0.0017	-0.362	0.7777	-0.49	-0.8357	-0.3345	-0.2513	-0.2437	0.4526	-0.0735	-0.6341	-0.5706	0.0609	1.352	0.4024	-0.5619	0.3832	0.8651	-0.3178	-0.1838	0.1041	0.3412	-0.3741	-0.6427	-0.1132	-0.2425	0.22	0.4044	1.953	0.4475	-0.3138
BP0466	alcohol dehydrogenase	0.0781	-0.078	-0.1564	-0.3882	-0.2616	-0.3028	-0.4557	-0.1583	-0.2409	-0.6639	0.2326	-0.0093	0.0638	-0.1034	0.1657	0.1073	-0.1402	-0.1955	-0.2755	-0.44	-0.2722	-0.074	0.3489	0.3579	-0.0289	-0.1239	-0.0262	0.0068	-0.3133	-0.2884	0.3065	0.3293	-0.1353	-0.2411	0.055	-0.1065	-0.1242	-0.0867	-0.2078	-0.025	0.0272	0.1007	-0.0891	0.206	0.4166	0.4511	-0.3383	0.2384
BP0467	acetolactate synthase large subunit	-0.0691	0.169	0.4753	-0.02	0.0188	-0.261	-0.052	-0.0598	0.0974	-0.1119	0.1242	0.0302	0.0659	0.0578	-0.2149	0.0531	-0.1312	0.4728	-0.0844	-0.2024	0.0875	0.1443	0.4513	0.2429	-0.0122	0.3072	0.003	0.3954	-0.3427	0.0481	0.3471	0.4177	0.2355	0.1459	0.0527	-0.1587	0.111	0.2578	0.4299	0.2167	0.4311	-0.2178	0.5931	0.4603	0.3118	0.7559	0.488	0.2438
BP0468	AsnC-family transcriptional regulator	-0.4871	-0.2379	-0.232	-0.4473	-0.3193	-0.3151	-0.4422	-0.249	-0.2936	-0.5361	-0.3203	-0.1456	-0.2532	0.0083	-0.1733	-0.3125	-0.2633	-0.083	-0.1576	-0.1762	-0.2188	-0.2093	-0.1624	0.1916	-0.2307	-0.3296	-0.0317	0.2327	-0.3456	-0.4775	-0.462	0.4166	-0.0141	-0.214	-0.1529	-0.1978	0.0785	0.034	-0.2724	0.1759	-0.268	0.0607	-0.147	-0.0134	0.4528	0.6247	0.1445	0.2416
BP0469	putative membrane protein	0.05	0.1325	-0.0564	-0.6367	0.1086	-0.8184	-1.1749	-0.6529	-0.3521	-0.42	-0.3077	0.164	-0.099	0.119	-0.2075	-0.3784	-0.4429	-0.0174	-0.2153	-0.4122	-0.3331	-0.5677	-0.3581	-0.2076	-0.2721	-0.7605	-0.199	-0.4741	0.2882	-0.2297	-0.3847	0.421	-0.2067	-0.0917	-0.0545	-0.315	-0.0758	-0.1406	-0.3607	-0.4152	-0.6211	0.0885	-0.2688	-0.0087	0.5701	0.5828	-0.6381	-0.2635
BP0470	conserved hypothetical protein	0.0357	0.1786	0.1062	0.0315	0.0798	-0.02	-0.107	0.1837	0.0393	0.2078	0.0965	0.0453	0.0473	0.285	0.1347	0.0962	0.1662	0.2119	0.1329	-0.5855	0.2583	0.0138	0.2434	0.5277	0.2479	0.1627	0.3112	0.2173	0.0867	-0.1618	0.0435	-0.2289	0.1801	-0.4136	0.3	0.0794	0.3524	0.1831	0.0278	0.1816	0.1537	0.4107	0.3658	-0.1079	0.12	-0.1427	0.3871	0.2983
BP0471	3,4-dihydroxy-2-butanone 4-phosphate synthase	0.2631	-0.3573	-0.458	-0.6444	-0.1721	-0.8706	-0.8186	-0.6033	-0.6384	-0.5045	-0.0302	0.1284	-0.1182	-0.271	0.1881	-0.3139	-0.1	-0.4172	-0.4915	-0.5437	-0.5796	-0.9043	-0.1047	-0.0704	-0.4479	-0.4499	-0.4046	-0.348	-0.1609	-0.7899	-0.0752	0.4287	-0.452	-0.3731	0.0915	-0.3569	-0.3359	-0.6106	-0.5103	-0.4247	-0.7379	-0.0257	-0.5737	0.0935	0.8992	0.9185	-0.4695	-0.5465
BP0472	conserved hypothetical protein (Pseudogene)	-0.1655	-0.1273	-0.156	-0.1715	-0.0983	-0.0795	-0.0974	-0.1219	-0.0563	-0.5949	-0.207	-0.0475	-0.1029	-0.2733	-0.4628	-0.1002	-0.2439	-0.4945	-0.532	-0.4015	-0.4166	-0.621	-0.3505	0.1232	-0.2424	-0.3862	-0.3978	-0.2161	-0.1517	-0.1205	-0.2882	0.3725	-0.4522	-0.3342	-0.1523	-0.5978	-0.1755	-0.2651	-0.5318	0.0251	-0.5932	-0.2412	-0.2014	-0.0093	0.4766	0.2608	-0.7384	0.1357
BP0474	choloylglycine hydrolase	0.1658	-0.0587	-0.4306	0.2524	-0.0931	-0.1862	-0.3795	0.1202	-0.259	-0.3498	0.3239	0.3388	0.2223	0.3236	0.4983	-0.5544	0.2997	0.1389	0.1995	-0.1296	0.0813	0.3172	0.2893	0.492	0.1925	-0.0541	-0.0534	0.4698	-1.4271	-3.1712	-2.4758	0.6187	0.3282	0.0396	0.1592	0.2313	0.2764	0.2842	0.0882	0.5549	0.1992	0.5184	0.1237	0.4247	0.9223	0.4496	0.1686	0.5676
BP0475	ribonuclease E	-0.0678	0.183	-0.3313	0.2623	-0.234	-0.1147	-0.1434	0.4822	-0.0472	-0.542	0.089	0.0099	0.3203	0.0663	0.2062	0.1218	0.4809	-0.1127	-0.0263	-0.7631	-0.0281	0.2176	0.4821	0.6767	0.1062	-0.1725	0.3856	0.6065	-0.0397	0.0137	0.3528	-0.352	0.098	-0.5794	-0.0768	-0.021	0.1894	0.2274	-0.0055	0.5023	0.3448	-0.1743	-0.0656	0.156	-0.1563	-0.4268	-0.3218	0.5029
BP0477	ribosomal large subunit pseudouridine synthase C	0.0457	0.126	0.0925	0.0243	-0.0944	-0.3862	-0.3085	-0.0187	-0.1743	-0.0992	-0.0207	0.2328	0.1028	0.4324	0.3188	0.0427	0.2928	0.157	0.1043	-0.1268	0.001	0.1387	0.5367	0.4218	0.2627	0.2489	0.364	0.3417	-0.0099	-0.2284	0.0504	-0.0442	0.2495	-0.0061	0.2645	-0.0674	0.2195	0.2723	0.0722	0.2983	0.2514	0.1727	0.1719	0.1087	0.106	0.0212	-0.0102	0.2878
BP0478	probable hydrolase	0.1954	0.0244	0.598	-0.2995	0.0355	-0.2325	-0.3385	-0.4762	-0.2874	-0.1143	0.1342	0.1264	0.1119	0.3591	0.1568	-0.5731	-0.2194	0.4099	-0.1166	-0.2159	-0.0368	-0.1346	-0.3125	0.1771	0.2704	0.0814	0.3144	0.0886	0.318	-0.1798	-0.0429	0.3479	0.059	0.0675	0.4968	-0.0812	0.3498	0.3269	0.1092	-0.0513	-0.1526	0.4329	0.1918	0.1846	0.727	0.9475	0.1913	-0.0456
BP0479	conserved hypothetical protein	-0.37	-0.0084	-0.6687	0.1716	-0.4098	-1.0107	-1.045	-0.0538	-0.6296	-0.6599	-0.1839	-0.2022	0.054	-0.1706	-0.3304	0.6533	0.1345	-0.0047	-0.0454	-0.58	-0.5589	-0.0905	0.4718	0.5385	0.0628	-0.0436	0.5674	0.9449	-0.5614	-0.366	-0.254	0.4206	0.1539	-0.3099	-0.2065	-0.0742	0.067	0.3112	0.2837	0.7746	0.0072	-0.0168	-0.1305	0.3258	0.5338	0.3145	0.1892	0.7823
BP0480	putative membrane protein	0.1595	-0.3597	0.3423	-0.5015	0.142	-0.4195	-0.2905	-0.85	-0.5345	-0.3782	0.1837	0.2448	0.1351	0.168	0.2223	-0.1827	-0.0962	0.3467	-0.1408	0.4356	-0.4401	-0.721	-0.1625	0.0084	0.2006	0.3904	0.219	0.0209	-0.0134	-0.4404	0.1031	0.3085	0.146	0.7307	0.5253	-0.0216	0.266	0.3659	0.2895	0.0896	-0.5976	0.4712	-0.181	0.3329	0.7704	1.067	0.2747	0.0913
BP0482	conserved hypothetical protein (Pseudogene)	0.2238	-0.0338	-0.2082	0.4131	0.1367	-0.6255	-0.212	0.1747	-0.2589	-0.8353	0.3093	-0.034	-0.2433	-0.4607	-0.0032	0.3162	0.318	-0.2755	-0.4401	-0.4486	-0.3197	0.2247	0.6415	0.5924	0.1941	-0.0031	0.0402	0.6958	-0.7094	-0.5461	-0.0664	0.294	-0.1611	-0.2623	-0.1192	-0.287	0.0942	0.1522	0.0424	0.4808	0.0746	-0.2727	-0.0621	0.3855	0.2085	0.3461	-0.4381	0.5156
BP0483	AraC-family transcriptional regulator	0.2629	-0.0161	-0.0614	0.264	-0.0915	-0.8166	-0.8584	-0.1607	-0.2972	-0.4089	0.0228	0.2645	0.1129	0.3695	0.2718	-0.1397	0.4521	0.1386	0.0906	-0.077	0.0348	-0.0395	0.1634	0.6467	0.1706	0.1417	0.465	0.5634	-0.3824	-1.1853	-0.5816	0.8209	0.1486	0.1037	0.3105	0.1133	0.0665	0.1568	0.0863	0.4764	0.0961	0.533	0.2235	0.1096	0.8782	0.5586	0.0605	0.4719
BP0484	L-lactate dehydrogenase	0.3202	0.1614	0.2168	0.3141	0.1829	-0.6073	-0.5927	-0.2547	-0.2893	0.3301	0.1688	0.3565	0.3228	0.6254	0.3487	-0.4393	0.3231	0.5106	0.2115	-0.5096	0.4103	-0.0848	0.0205	0.3859	0.4253	0.5055	0.3737	0.4462	-0.669	-0.9182	-0.8023	0.2936	0.3952	-0.1237	0.5184	0.3915	0.4252	0.4244	0.2347	0.6096	0.2018	0.6959	0.5726	0.4639	0.2943	0.2261	0.6114	0.4121
BP0485	probable acylphosphatase (Pseudogene)	-0.1428	0.0718	0.3585	-0.0562	-0.0874	-0.1061	0.0057	0.1681	-0.1481	-0.658	-0.0554	-0.0082	0.0515	-0.0891	-0.1127	-0.0544	0.0773	0.0642	-0.3287	-0.7149	-0.1783	0.1817	0.5679	0.4493	-0.0324	-0.023	0.2003	0.2823	-0.4167	-0.3562	0.0331	0.5509	-0.0746	-0.3512	-0.0836	-0.2236	0.2761	0.4024	0.2357	0.2481	0.2573	-0.1398	-0.1565	0.3074	0.5169	0.727	-0.4434	0.606
BP0486	putative exported protein	0.1578	-0.3213	-0.4832	0.0037	0.3504	-0.2011	-0.2241	0.5162	0.1239	-0.5699	0.1606	0.067	-0.0523	-0.0229	0.1812	0.2339	0.2237	-0.1331	-0.2128	-0.4511	-0.1294	0.3766	0.3346	0.5914	0.1209	0.0815	0.4189	0.8002	-0.1614	-0.3699	0.0517	0.0495	-0.0115	-0.0598	0.1758	-0.0609	-0.15	0.0704	0.1959	0.5997	0.4348	0.0682	0.2511	-0.0797	0.4187	0.1457	0.2629	0.4136
BP0487	probable amidase	0.2751	-0.1181	-0.0836	-0.0898	0.0717	-0.5461	0.1278	-0.1163	0.0691	-0.4932	-0.2166	0.1955	0.134	-0.0633	-0.0958	-0.0222	-0.0433	0.1591	-0.521	-0.0923	-0.1941	-0.1886	-0.0912	0.4287	-0.0162	0.0895	0.4553	0.1218	-0.2592	-0.8726	-0.5293	0.7281	-0.3137	-0.013	0.4551	-0.0626	-0.1007	0.2707	-0.0814	0.1453	-0.1491	-0.0209	0.1712	-0.299	0.4035	0.4933	-0.4888	0.0609
BP0488	transcriptional regulator	0.4437	-0.1196	-0.2725	0.063	0.082	-0.539	-0.7056	0.065	-0.1244	-0.4302	0.107	0.0862	-0.1597	-0.0496	0.1634	0.2395	0.2203	-0.1477	-0.1746	-0.3168	-0.2419	-0.1009	0.3007	0.5193	-0.2142	-0.0733	0.0035	0.3587	-0.0524	-0.3921	0.2771	0.527	-0.0296	-0.2411	0.2041	-0.2716	-0.1593	-0.2626	-0.0034	0.461	0.0028	0.1203	0.0178	-0.1787	1.0197	0.9159	0.0154	0.1912
BP0489	DNA gyrase subunit B	0.1977	-0.0656	0.2556	-0.2981	0.008	-0.3294	-0.1389	-0.4202	-0.5225	-0.1145	0.207	0.1426	0.3687	0.0148	-0.0362	-0.0577	-0.1403	-0.0136	-0.0431	0.0676	-0.2589	-0.3932	-0.3184	0.0957	-0.2521	-0.1927	-0.0056	-0.0904	0.0672	-0.0755	0.1454	0.1532	0.1074	0.2112	0.1046	-0.0544	-0.0317	0.24	-0.0905	-0.0498	-0.2032	0.1818	-0.2528	-0.0159	0.3877	0.5501	0.0093	0.0661
BP0490	DNA polymerase iii, beta chain	-0.1353	-0.0787	0.2537	-0.2422	-0.0781	-0.3023	-0.2806	-0.2605	-0.2851	-0.0381	0.2072	0.1357	0.0946	-0.0783	-0.0064	-0.4975	-0.1355	0.0312	-0.1747	0.0798	-0.2442	-0.2465	-0.251	-0.1712	-0.2238	-0.4022	-0.1106	-0.0346	-0.0671	-0.0884	-0.1169	0.1895	0.1362	0.1985	0.0805	-0.0107	-0.0531	0.2647	0.0694	0.0421	-0.0901	0.0662	-0.0912	0.1428	0.4106	0.607	-0.1057	0.0788
BP0491	chromosomal replication initiator protein	0.0785	0.0115	0.3099	-0.0309	-0.0211	-0.3449	-0.4272	-0.242	-0.4664	-0.0789	0.0389	0.235	-0.0493	0.2725	0.0732	0.5614	-0.0076	0.1845	-0.0939	-0.7868	0.1135	-0.1208	-0.0368	0.2326	0.3063	-0.035	0.0526	0.0798	0.2685	-0.001	-0.0858	1.0656	-0.0208	-0.3172	0.3091	-0.2382	0.2701	0.083	0.07	0.0785	-0.0908	0.1088	-0.0519	0.1219	1.3689	1.2701	-0.1178	0.1332
BP0492	50S ribosomal protein L34	0.2271	0.0399	-0.1955	0.6258	0.1375	0.0621	-0.2094	0.9298	0.7498	-0.1128	0.1784	0.5393	0.3757	0.5015	0.3104	0.1093	0.9164	0.2746	0.3749	0.2795	0.191	0.1127	0.4312	0.8859	0.4233	0.3609	0.5797	0.9601	0.1834	0.1913	0.5561	-0.0164	0.4027	0.3197	0.5319	0.3659	0.1412	0.112	0.1267	0.8821	0.1486	0.3526	0.4299	-0.1975	0.1864	-0.3326	0.1047	0.8665
BP0493	ribonuclease P protein component	0.0343	-0.3226	-0.236	-0.0556	-0.1232	-0.2818	-0.4791	0.2394	0.2402	-0.0889	-0.068	0.2926	0.0988	0.3115	0.2326	-0.0697	0.2907	0.2332	0.0381	-0.2622	0.0773	-0.3727	-0.2931	0.4246	0.1411	0.0078	0.4121	0.5732	0.3132	-0.2232	-0.1102	0.2579	-0.0275	-0.0308	0.1727	0.1586	-0.0714	0.0216	0.0109	0.318	-0.2213	0.2885	0.2804	-0.1306	0.3311	0.2209	0.0314	0.2701
BP0494	conserved hypothetical protein	-0.0728	-0.0955	-0.0379	0.0956	-0.0707	-0.5553	-0.4781	0.1402	-0.0278	-0.5114	-0.1788	0.0991	0.1729	0.199	-0.0057	-0.3011	0.2035	0.0639	-0.1372	-0.1364	0.0358	-0.3018	0.1461	0.402	-0.1393	-0.0053	0.1635	0.4483	0.1197	-0.3034	-0.1611	0.3129	-0.1155	-0.0809	0.0076	-0.0675	0.01	0.0626	0.1675	0.3785	-0.2015	0.1201	-0.011	0.0397	0.4525	0.6161	-0.5027	0.4077
BP0495	probable inner-membrane protein	-0.0676	0.2015	0.1359	0.1988	0.1662	0.0313	0.1015	0.2983	-0.0204	-0.113	0.1119	0.0564	0.3544	0.2617	0.1517	-0.2133	0.2292	0.0899	-0.0791	-0.619	-0.0869	0.0199	0.1637	0.5243	0.0597	-0.1348	0.5494	0.4356	0.1146	-0.1354	-0.077	0.0739	0.0919	-0.2196	0.1372	0.0473	0.2121	0.4636	0.3081	0.6496	0.1832	0.2955	-0.0079	0.0609	0.319	0.2037	0.1399	0.5896
BP0496	transposase	-0.2574	-0.684	-0.614	-0.642	-0.1043	-0.6759	-1.0492	0.0039	0.0656	-0.4562	0.2777	0.1756	0.2399	-0.2859	0.701	-0.1632	0.0086	-0.2406	-0.0335	-0.5936	-0.2681	-0.9341	-0.0765	0.4259	-0.5047	0.0375	-0.1675	-0.037	-0.1812	-0.4647	-0.1216	0.4423	-0.1698	0.2473	0.1656	-0.0649	-0.4908	-0.6131	-0.3609	-0.0479	-0.976	-0.1447	0.1542	-0.329	0.533	0.7931	-0.7435	-0.2898
BP0497	N-terminal region of acyl carrier protein phosphodiesterase (pseudogene)	0.2044	0.2631	-0.2115	0.36	0.1978	-0.3328	-0.74	0.0712	-0.2478	-0.3589	0.1096	0.3458	0.3988	0.0101	0.2162	0.0581	0.4233	0.3293	0.2961	0.1969	-0.0957	-0.0276	0.0944	0.2318	-0.0288	-0.0869	0.1041	0.3922	-0.8537	-1.1225	-0.954	-0.0675	-0.0113	0.0479	0.0138	0.0145	-0.146	-0.0983	-0.0142	0.5714	0.078	0.0695	0.0974	-0.1288	0.0793	-0.1436	-0.1981	0.389
BP0498	LysR-family transcriptional regulator	0.0662	0.028	0.2762	0.0019	0.1353	-0.3249	-0.3821	-0.0601	-0.0968	-0.0549	0.0973	0.3746	0.2891	0.2299	-0.0257	0.0933	0.0065	0.3043	0.1486	-0.2491	0.1005	-0.2282	0.2239	0.3728	0.1388	0.2942	0.4205	0.2374	-0.0802	-0.3592	-0.1412	0.6284	0.2242	-0.0805	0.4615	-0.0763	-0.0863	0.1433	0.0237	0.345	0.1069	0.2283	0.2719	0.2322	0.7048	0.8943	-0.0109	0.4024
BP0499	hypothetical protein	0.6021	0.2331	1.5261	0.3645	0.6457	-0.0347	-0.2211	-0.0037	0.1302	0.6811	0.8249	0.8589	0.7344	0.5325	0.0301	0.0459	-0.1137	1.1993	0.5195	0.2543	0.5968	-0.4262	-0.449	-0.2226	0.4665	0.2598	0.4032	-0.2103	-0.6499	-1.405	-1.0748	-0.2254	-0.2902	-0.1178	0.4046	-0.1876	0.1475	0.0931	0.0767	-0.061	-0.0905	0.8548	0.4996	-0.0873	-0.0016	0.6021	0.1894	-0.1446
BP0500	hypothetical protein	-0.0156	0.1399	0.0847	0.4108	0.035	-1.3017	-1.3432	-1.0321	-1.2568	-0.4065	-0.3209	-0.069	0.0245	0.0917	-0.2175	-1.5977	-0.0781	0.3128	-0.2687	-1.0606	0.5723	0.6673	-0.1144	0.4175	0.9321	1.0021	1.3006	1.3881	-2.8498	-3.0903	-2.8332	0.0377	-0.0579	-0.8086	-0.0422	-0.0311	-0.086	0.234	-0.0239	0.4889	0.2503	0.4957	0.6527	0.1288	0.4007	0.3813	0.2656	0.4549
BP0501	C-terminal region of two component sensor kinase (partial)	-1.2491	-1.5127	-1.4375	-1.5011	-1.2312	-1.5528	-2.1378	-1.8295	-1.8202	-1.3211	-1.3859	-1.1777	-1.4187	-1.2184	-1.5552	-0.1347	-1.2962	-1.6204	-1.6823	-1.8271	-1.7673	-1.9028	-1.7471	-1.1152	-1.7492	-2.0312	-1.8248	-1.4726	-1.3908	-1.7537	-1.3528	-0.8051	-1.5602	-1.8243	-1.2543	-1.5915	-1.5895	-1.7463	-1.132	-1.4241	-1.9867	-1.2704	-1.4472	-1.5691	-0.7675	-0.6661	-1.2478	-1.3657
BP0502	integrase	-0.0211	0.0763	0.2806	0.0386	-0.0787	0.3172	0.5279	0.425	0.314	-0.1084	0.3098	-0.0201	0.4041	0.267	0.159	-0.0794	0.2301	0.2925	0.1227	-0.4351	0.0017	-0.051	-0.0016	0.4056	0.166	-0.0581	0.2821	0.3598	0.212	0.2499	0.6641	-0.1334	0.2248	-0.2323	0.3606	0.0022	0.2327	0.2674	0.3079	0.3275	0.4061	0.2522	0.0197	0.1544	-0.0083	0.0762	0.1152	0.4578
BP0503	phage-related conserved hypothetical protein	0.0867	-0.3093	-0.4293	-0.1838	-0.1454	-0.2629	-0.4148	0.0407	0.118	-0.4664	0.0853	0.1279	0.1471	0.1113	0.2884	0.1638	0.1267	-0.1787	-0.1817	-0.5384	-0.0868	-0.0167	0.0695	0.3474	-0.3066	-0.1814	0.198	0.1278	-0.0101	-0.4141	-0.231	0.3162	0.2488	-0.0164	0.3539	0.0478	-0.2528	-0.1503	-0.1763	0.2231	-0.1217	0.3648	0.2633	0.0445	0.7668	0.4932	0.2203	0.4416
BP0504	phage-related hypothetical protein	0.0995	0.0633	0.0087	0.1639	0.0608	-0.0782	-0.1871	0.5852	0.1121	-0.4241	0.0657	0.0893	0.2611	0.1611	-0.0962	0.1426	0.234	0.0233	-0.0961	-0.0528	0.1288	0.6992	0.5011	0.6892	0.1426	0.1856	0.3218	0.942	-0.4606	-0.3032	-0.1598	0.4903	0.4136	0.3037	0.348	0.2953	0.0613	0.3959	0.1139	0.7262	0.4402	0.1997	0.347	0.7543	0.4945	0.2968	0.1701	0.9725
BP0505	phage-related conserved hypothetical protein	0.1044	-0.3822	-0.1776	-0.4005	0.0701	-0.16	-0.149	0.0315	0.1432	-0.164	0.2505	0.3955	0.1482	0.1807	0.4447	-0.1078	-0.0713	-0.065	-0.1221	-0.098	0.0171	-0.0307	0.1736	0.131	-0.1494	-0.1909	-0.0565	-0.0226	0.0038	-0.2994	-0.0627	0.5053	0.5509	0.394	0.3841	0.3372	-0.1571	0.076	0.1386	0.3191	-0.0249	0.5611	0.1125	0.2439	0.9074	0.8132	0.1316	0.2669
BP0506	phage-related hypothetical protein	-0.1129	-0.1679	-0.344	-0.2133	-0.0165	-0.2961	-0.2153	0.3438	-0.0273	-0.2447	0.0879	0.1577	0.339	0.3869	0.1724	0.0907	-0.036	-0.0293	-0.0811	-0.2919	0.0914	-0.1999	0.0238	0.2452	-0.2649	-0.0991	-0.0584	0.2309	-0.141	-0.2439	-0.234	0.4162	0.5176	-0.0282	0.3353	0.3794	-0.0798	0.383	-0.0433	0.6475	0.036	0.5755	0.1653	0.3936	0.6442	0.684	0.0184	0.8097
BP0507	hypothetical protein	-0.1583	0.0271	0.1886	-0.0869	0.0082	-0.0727	-0.0011	0.1459	0.3467	-0.4513	0.2219	0.2754	0.4563	0.1616	0.097	0.186	0.1189	-0.0623	0.006	-0.0455	0.0385	0.1045	0.0879	0.6777	0.1966	0.0348	0.3521	0.4998	-0.2037	-0.15	0.0355	0.5904	0.5282	0.4032	0.5437	0.3109	0.202	0.5081	-0.0018	0.5317	0.2157	0.3426	0.1422	0.5556	0.4812	0.439	0.0203	0.7877
BP0508	phage-related exonuclease	-0.1801	-0.1732	-0.2761	-0.1484	-0.0101	0.1599	-0.0714	0.2671	0.2391	-0.0259	0.38	0.4252	0.4922	0.3387	0.2676	-0.2713	0.0143	0.0263	0.1449	-0.0511	-0.0384	-0.1434	-0.0529	0.3571	-0.0993	0.0132	0.2402	0.4126	0.1175	-0.0393	0.017	0.7047	0.7669	0.2777	0.6525	0.4694	-0.0403	0.1907	-0.0127	0.4506	0.053	0.4538	0.0339	0.4454	0.6468	0.4102	0.4596	0.7097
BP0509	phage-related DNA recombination protein	-0.4131	0.1772	0.0452	0.0706	-0.3606	0.1155	-0.0096	0.3735	0.0695	-0.1935	0.4579	0.3757	0.6154	0.4583	0.1294	-0.1553	0.3452	0.1886	0.3056	-0.4637	0.1648	0.1603	0.3277	0.6544	0.1606	0.2415	0.458	0.6113	-0.1658	-0.1403	0.1417	0.922	0.7445	0.1327	0.552	0.3084	0.187	0.4767	0.1643	0.644	0.2574	0.0444	-0.0176	0.4335	0.7846	0.6079	-0.0571	0.6779
BP0510	phage-related putative membrane protein	0.0754	0.0648	-0.44	-0.5025	0.0026	-0.4377	-0.3549	-0.0176	-0.1139	-0.3607	0.1595	0.3541	0.0395	0.1456	0.4004	0.4234	-0.0051	-0.2806	-0.0708	-0.6696	-0.2194	-0.4975	-0.2273	0.1915	-0.0378	-0.1003	0.0515	-0.0824	-0.2009	-0.4992	-0.2106	0.6406	0.3516	-0.0446	0.4639	0.0395	-0.2108	-0.1223	-0.2006	0.0742	-0.5179	0.3072	-0.0094	-0.0264	0.7949	0.4763	0.0231	0.0437
BP0511	phage-related hypothetical protein	0.0061	-0.1346	-0.0493	-0.1694	-0.0403	-0.0664	0.0495	0.1652	0.1253	-0.3139	0.383	0.463	0.4234	0.2289	0.3681	-0.0143	0.0934	0.056	0.1309	0.1194	0.1019	0.009	0.0505	0.3191	0.2918	0.2471	0.5554	0.3074	-0.1784	-0.2232	0.1982	0.5459	0.6632	0.6703	0.5451	0.1852	0.1033	0.2031	-0.0165	0.3081	-0.2109	0.3105	0.1572	0.1739	0.7287	0.6066	0.1688	0.391
BP0512	phage-related hypothetical protein (pseudogene)	0.2443	0.1142	0.1589	-0.1405	0.1993	-0.0016	0.2635	0.1807	0.0362	-0.4581	0.2122	0.2813	0.3843	-0.1195	0.2079	0.4356	0.1484	0.0533	0.0552	-0.1319	-0.1525	0.2147	0.4449	0.5848	0.2415	0.1458	0.215	0.2952	-0.368	-0.128	-0.0802	0.7729	0.471	0.3236	0.4781	0.0062	0.2029	0.2493	0.077	0.2582	0.1323	-0.0061	-0.1255	0.521	0.8906	0.8637	-0.2187	0.632
BP0513	phage-related hypothetical protein	0.1969	0.3127	0.1875	0.1478	0.1769	0.4117	0.4498	0.38	0.2002	0.0135	0.5452	0.3491	0.3166	0.2642	0.2922	0.0029	0.2075	0.2035	0.091	0.3634	0.2228	0.2785	0.6744	0.5147	0.3103	0.2888	0.3281	0.4369	-0.0394	0.1052	0.4531	1.073	0.8128	0.626	0.6857	0.2438	0.3007	0.4324	0.1128	0.358	0.1965	0.1986	-0.0773	0.7791	0.879	1.0196	0.1927	0.5512
BP0514	transposase	-0.2723	-0.6224	-0.7414	-0.5857	-0.1668	-0.8503	-1.147	-0.271	-0.414	-0.5258	0.0929	-0.1174	-0.1816	-0.2791	0.4462	-0.4696	-0.1307	-0.5658	-0.337	-1.098	-0.5469	-1.057	-0.0402	0.2595	-0.6614	-0.569	-0.7931	-0.3373	0.0281	-0.4105	0.0639	0.2902	-0.2665	-0.0409	-0.196	-0.2811	-0.4412	-0.7893	-0.6683	-0.3017	-1.1935	-0.1048	-0.414	-0.6117	0.347	0.5536	-0.8399	-0.4687
BP0518	conserved hypothetical protein	0.0877	-0.018	0.0009	-0.2588	-0.0342	-0.4771	-0.6293	-0.5378	-0.2865	-0.3848	-0.0204	0.4153	0.0372	0.3248	-0.0138	-0.1917	-0.204	0.1356	-0.1538	-0.4444	0.0183	-0.5918	-0.2361	-0.0373	0.216	0.154	-0.0334	-0.234	0.3276	-0.1513	-0.0455	0.3217	-0.0285	0.0311	0.4288	0.0428	-0.0558	0.1796	-0.3025	-0.0307	-0.5403	0.4512	0.1847	0.0522	0.4443	0.2684	-0.3718	-0.0151
BP0519	probable glutathione S-transferase	-0.0969	-0.2396	-0.1289	-0.0226	-0.0665	-0.6636	-0.659	0.0356	-0.1222	-0.6287	-0.1848	0.0596	-0.012	0.1394	-0.1163	0.1705	0.0048	0.1557	-0.0497	-0.5011	-0.1537	-0.2929	-0.0313	0.2649	0.0662	-0.0004	0.1816	0.3439	0.1015	-0.138	-0.2131	0.8227	0.1836	-0.0969	0.1911	-0.1124	-0.1754	0.0027	0.0775	0.3993	-0.1219	0.0962	0.2189	0.2967	0.7289	0.6692	-0.2387	0.3772
BP0520	putative exported protein	-0.267	0.2375	-0.1676	0.0539	-0.0457	-0.3605	-0.3521	-0.1574	-0.311	-0.5408	-0.3112	-0.0469	-0.0275	0.0265	-0.4002	-0.5489	0.1608	0.014	-0.0937	0.1042	0.1015	0.0976	0.2212	0.603	0.1168	0.1822	0.1383	0.3716	-0.5019	-0.8298	-0.4835	-0.2096	0.0037	0.0812	0.054	-0.3208	0.1698	0.2236	0.1057	0.6749	0.4992	0.0568	0.3277	0.034	0.1227	-0.2985	-0.0606	0.4465
BP0521	conserved hypothetical protein	0.0623	-0.0296	-0.2682	-0.0754	-0.3293	-0.0177	-0.0418	0.1209	-0.038	-0.194	-0.0026	0.0277	0.3087	0.1662	-0.1164	-0.2325	-0.0249	0.0446	-0.095	-0.7417	-0.1347	-0.3806	-0.2258	0.3204	-0.0434	-0.1272	-0.0572	0.1368	0.2875	-0.1768	0.1643	0.5977	0.0596	-0.4821	-0.0785	-0.0678	-0.1163	0.1272	-0.0074	0.1597	0.028	0.1146	0.0847	0.1282	0.6014	0.4932	-0.1417	0.2081
BP0522	putative metal-activated pyridoxal enzyme	-0.234	-0.0592	-0.027	-0.3698	-0.2285	-0.3968	-0.5572	-0.4884	-0.3273	-0.6105	0.159	0.017	0.0917	-0.2779	-0.2222	-0.0818	-0.3031	-0.0941	-0.3846	-0.4805	-0.2111	-0.3572	0.1233	-0.0537	0.05	-0.2405	0.0138	-0.2483	-0.1271	-0.0786	-0.1974	0.198	0.0513	-0.0871	-0.0671	-0.1148	-0.0936	0.0203	-0.416	-0.2956	-0.3392	-0.034	-0.3242	0.0943	0.1481	0.4868	-0.0768	-0.0604
BP0523	probable haloacid dehalogenase	0.2027	-0.8211	-1.1772	-0.3509	-0.3283	-0.9641	-1.2232	-0.0579	-0.851	-0.7798	-0.0458	0.3188	-0.3291	0.1005	0.257	-0.4959	0.5002	-0.8781	-0.6212	-0.9681	-0.4473	-0.9202	0.1122	0.4485	-0.4001	-0.3048	-0.5957	-0.3732	0.1353	-0.8888	0.0825	0.2113	-0.5686	-0.3356	0.0286	-0.4866	-0.525	-0.6086	-0.8499	-0.3507	-0.6503	0.3802	-0.6065	-0.53	0.6915	0.1378	-0.5992	-0.3191
BP0524	probable transcriptional regulator (Pseudogene)	-0.2625	-0.2331	-0.0752	-0.0263	-0.1353	-0.3533	-0.3596	0.2602	-0.0088	-0.6008	-0.4032	-0.0128	-0.0089	0.0708	-0.2401	-0.0886	0.0343	-0.1668	-0.1949	-0.6224	0.0597	-0.0009	-0.2639	0.2893	-0.0759	-0.3785	0.1688	0.2812	-0.2238	-0.2142	-0.3677	1.0243	0.0652	-0.166	-0.0169	-0.0984	-0.0203	-0.1425	-0.1545	0.1352	-0.097	-0.0321	0.1006	0.1376	0.7456	0.6749	-0.6361	0.2359
BP0525	putative integrase (Remnant)	-0.1328	-0.0769	-0.4132	-0.1868	-0.2729	-0.4498	-0.241	-0.0515	-0.2066	-0.5019	-0.0436	-0.1085	-0.2873	0	0.0286	-0.7387	-0.0509	-0.2694	-0.144	-0.4557	-0.176	-0.3195	-0.2435	0.1845	-0.1765	-0.1367	-0.0979	-0.1184	0.174	-0.1902	0.1886	0.899	0.02	-0.2383	-0.0173	0.105	-0.0971	-0.2621	-0.6413	-0.1302	-0.3127	0.0799	0.0406	0.2019	0.6497	0.5264	-0.2883	-0.0563
BP0526	hypothetical protein	0.1284	-0.1321	-0.5329	0.0532	-0.06	-0.0898	-0.06	0.4505	-0.1343	-0.5443	0.0989	-0.1716	0.0281	0.0445	-0.0263	1.3316	0.3284	-0.449	-0.4482	-1.0219	-0.1681	-0.0615	-0.0181	0.3572	-0.253	-0.1497	0.1305	0.3475	0.1532	-0.3431	0.2364	0.4928	-0.1077	-0.8326	-0.3248	-0.2142	-0.0685	-0.2751	-0.4396	0.1417	-0.2058	-0.0053	-0.088	-0.0988	0.4994	0.153	-0.4652	0.0127
BP0527	entericidin A anti-toxin precursor	0.3689	0.1443	0.9599	-0.5938	-0.047	-0.2984	-0.2406	-0.5007	-0.5585	-0.9665	1.1543	0.1899	0.7344	0.0452	-0.0414	-0.4721	-0.1088	-0.1134	-0.4605	0.5233	-0.4135	-0.5455	0.3623	0.0633	-0.235	0.4089	-0.003	-0.3659	-0.1113	-0.2651	1.2717	0.3065	-0.5243	0.4028	0.4737	-0.4432	-0.1927	0.2991	0.0928	-0.1043	-0.1785	0.1366	-0.5437	0.2337	0.4331	1.2554	-0.0978	-0.1231
BP0529	autotransporter	-0.5751	-0.6071	-0.7888	-0.6234	-0.3034	0.0836	0.0528	0.1574	0.0786	-1.1801	-0.1823	-0.214	-0.08	-0.424	-0.4482	0.0132	-0.2649	-1.0268	-0.8319	-0.5306	-0.6564	-0.3562	-0.0691	0.011	-0.4258	-0.8368	-0.4673	-0.2344	0.9536	1.6051	1.7797	0.0381	-0.3306	-0.4996	-0.4067	-0.4486	-0.4916	-0.2593	-0.4849	-0.4958	-0.1265	-0.4734	-0.9833	-0.2153	0.0951	0.0956	-1.242	-0.1606
BP0530	conserved hypothetical protein	0.1583	-0.3542	-0.4142	-0.3719	-0.1612	-0.4338	-0.5385	-0.311	-0.5124	-0.4053	0.2852	0.2529	0.1152	-0.0339	0.1354	0.1713	-0.044	-0.3831	-0.3778	-0.4092	-0.3433	-0.5723	-0.1004	0.2475	-0.2445	-0.2229	-0.0635	-0.0828	0.201	-0.0908	0.346	0.336	-0.1994	-0.2737	0.0469	-0.2413	-0.267	-0.3158	-0.5047	-0.1265	-0.4871	0.166	-0.2651	-0.0596	0.7247	0.4709	-0.2322	-0.0692
BP0531	putative exported protein	0.1247	-1.0727	-0.9446	-0.7958	-0.3371	-0.7364	-0.9705	-0.6438	-0.5345	-0.4215	-0.0854	0.4117	-0.1879	0.2691	0.6049	0.4435	0.1652	-0.4042	-0.3491	-0.1859	-0.2489	-1.4212	-0.1797	0.1929	-0.2004	-0.6021	-0.6364	-1.2109	0.4182	-0.8971	-0.7744	0.1949	-0.348	-0.1462	0.4218	-0.3591	-0.2807	-0.8967	-0.774	-0.513	-0.5879	0.6388	-0.2379	-0.7794	1.0743	0.5862	-0.4761	-0.9217
BP0532	putative substrate-CoA ligase	-0.0235	0.2336	0.0895	-0.2996	0.2275	0.2474	0.2805	0.2278	0.2485	-0.3671	0.2622	0.0099	0.4202	0.2428	0.0991	-0.322	0.1964	0.1308	0.0816	0.1428	-0.1687	0.2998	0.7742	0.6841	0.1999	0.3086	0.3288	0.3938	-0.2253	-0.1619	0.2735	0.2641	0.4311	0.4103	0.3236	0.2012	0.287	0.4186	0.188	0.5358	0.4579	0.1304	0.2202	0.4097	0.2184	0.1937	0.0479	0.4881
BP0533	probable transcriptional regulator	-0.0414	-0.2309	-0.3694	-0.0226	-0.1831	-0.2659	-0.0304	0.2413	0.2255	-0.3101	0.0286	0.0365	0.1305	0.4164	0.0968	-0.3608	0.1801	-0.1147	-0.0933	-0.6803	0.2112	-0.2592	0.3214	0.5631	0.0012	0.2151	0.3163	0.4425	0.1336	-0.2059	-0.0921	0.4734	0.1957	-0.2386	0.3073	0.0722	-0.0094	0.0158	-0.0878	0.3296	0.2503	0.346	0.4166	-0.0141	0.3516	0.1938	-0.2761	0.5265
BP0534	probable enoyl-CoA hydratase/isomerase	-0.0466	0.1124	0.0803	0.3513	0.23	-0.3725	-0.4857	0.2958	-0.0268	-0.3777	-0.0047	0.3249	0.2155	0.5038	0.3372	-0.3482	0.6371	0.2566	0.0758	-0.8595	0.1367	0.1361	0.5641	0.9683	0.4331	0.202	0.475	0.7144	-0.7111	-1.0611	-0.8903	0.458	0.0855	-0.4207	0.4883	0.0022	0.2411	0.4125	0.4928	0.944	0.4305	0.6787	0.5202	0.4297	0.5335	0.6541	-0.0158	0.7118
BP0535	probable carboxymuconolactone decarboxylase	0.0537	0.4088	0.6466	-0.0529	-0.0739	-0.2283	-0.2956	-0.5378	-0.3636	0.2881	0.1725	0.2714	0.5356	0.6726	0.1057	0.2509	-0.0263	0.5972	-0.0075	-0.8371	0.168	-0.0292	-0.1447	0.2573	0.2786	0.0866	0.3925	0.0533	-0.4769	-0.7457	-0.591	0.461	0.1767	-0.461	0.4299	0.0139	0.2643	0.3182	0.5462	0.283	0.1469	0.3341	0.2908	0.3551	0.7302	0.8563	0.6542	0.1253
BP0536	putative exported protein (Pseudogene)	0.0904	-0.0399	-0.2696	0.1312	-0.0657	0.1913	0.2072	1.0537	0.6622	-0.133	0.2263	0.1637	0.2765	0.3278	0.3914	0.3221	0.7304	0.1681	0.3726	-0.2904	0.3507	0.0205	0.6034	0.9034	0.4522	0.3686	0.5676	0.9456	-0.8663	-0.8146	-0.565	-0.1746	0.4134	0.1918	0.4621	0.3589	0.4159	0.6602	0.4926	1.121	0.642	0.5113	0.6516	0.2797	-0.1452	-0.4301	0.4921	0.9667
BP0538	arginase	0.2065	0.0973	0.2603	-0.3023	0.1528	0.1919	-0.0181	-0.3836	-0.2873	-0.4999	0.5364	0.3471	0.3807	0.1616	0.274	0.3436	-0.0912	0.1288	-0.1655	0.0692	-0.0079	-0.0894	0.267	0.2987	0.1493	0.0294	0.2467	0.0523	0.1079	-0.1648	0.2248	0.5984	0.1338	0.2598	0.2687	0.1653	0.3431	0.1754	0.0386	-0.0549	0.098	0.4552	0.1192	0.3466	0.7869	0.937	-0.1939	-0.054
BP0539	ornithine aminotransferase	0.143	0.1074	0.0338	-0.0754	0.1571	-0.4645	-0.4955	0.1275	-0.0891	-0.1853	0.4873	0.2956	0.4085	0.1229	0.292	-0.07	0.3223	0.031	0.0694	-0.0585	-0.0516	0.103	0.0014	0.4004	0.1405	0.4453	0.5772	0.3927	0.2412	-0.1617	0.3314	0.4354	0.2186	0.3044	0.4804	0.1462	-0.0142	0.0844	0.1206	0.5325	0.0525	0.3985	0.2953	0.1758	0.6918	0.773	-0.1044	0.4705
BP0541	probable transcriptional regulator	-0.0642	0.0166	0.3912	-0.1907	-0.0702	-0.3553	-0.5264	-0.2596	-0.1564	-0.0573	0.0856	0.0702	0.2588	0.2464	-0.1954	0.2088	-0.2695	0.2489	-0.0987	-0.3457	0.0357	-0.3403	-0.231	0.5098	0.0546	0.054	0.188	0.1925	0.0254	-0.1999	0.143	0.1467	-0.0134	-0.1524	0.2197	-0.3323	0.1109	0.1661	-0.0152	0.0831	-0.1061	0.0792	0.2681	0.2662	0.2185	0.4567	0.0128	0.0313
BP0542	putative exported protein	0.0674	0.0157	0.1457	-0.2079	-0.1463	-0.2199	-0.2102	-0.3783	-0.0318	-0.7535	0.4277	0.1096	0.0694	0.0491	0.2342	-0.0373	0.031	-0.1336	-0.2874	0.0805	-0.1322	-0.1874	0.1928	0.4614	0.2365	0.3132	0.0319	-0.0419	-0.2555	-0.3608	0.4447	0.1694	-0.0237	0.0259	0.3362	-0.2117	-0.0352	0.1248	-0.0292	0.0637	0.1508	0.2342	-0.0447	0.064	0.5337	0.3266	-0.1493	0.1508
BP0543	conserved hypothetical protein	0.1192	-0.0548	-0.2578	-0.4659	-0.0718	-0.7281	-0.5897	-0.6785	-0.6128	-0.4555	0.2337	0.1415	0.1246	0.0068	0.1261	-0.4289	0.1103	-0.185	-0.3084	-0.4823	-0.1783	-0.3283	-0.0902	0.1201	-0.0227	-0.1351	-0.0594	-0.3361	-0.2079	-0.4746	0.0412	0.4014	-0.1864	-0.0589	0.0632	-0.0718	0.1117	0.1801	-0.6467	-0.1564	-0.1477	0.1548	-0.2789	0.0037	0.9413	0.597	-0.6373	-0.2357
BP0544	putative 4-oxalocrotonate tautomerase	-0.3938	-0.9611	-0.5858	-0.8779	0.0679	-0.3726	-0.1688	-0.5714	-0.7518	-0.6272	-0.0734	-0.5228	-0.2796	-0.245	0.0118	0.258	-0.3079	-0.4982	-0.7058	-0.7403	-0.8856	-0.8116	-0.0953	-0.0959	-0.6906	-0.8511	-0.1078	-0.8224	-0.2819	-0.4103	-0.4936	1.5634	-0.5869	-0.346	-0.4327	-0.5782	-0.2759	-0.3854	-0.6825	-0.6322	-0.511	-0.2441	-0.7696	-0.5779	1.9861	2.3519	-1.0007	-0.6687
BP0545	conserved hypothetical protein	0.028	0.0473	0.0655	-0.0703	0.0357	-0.1963	-0.3136	-0.0534	-0.13	-0.3784	0.1022	0.2053	0.1443	0.1428	0.2203	-0.3953	0.1889	0.174	0.1962	-0.0868	-0.0299	0.142	0.4094	0.4627	0.1818	0.025	0.2898	0.3679	0.047	-0.045	0.1988	0.261	0.3363	0.1135	0.1779	0.139	0.2549	0.2198	0.1557	0.2945	0.2627	0.0508	0.0715	-0.101	0.1939	0.1305	0.1393	0.3002
BP0546	bacterioferritin	-0.1093	-0.1213	-0.0488	-0.4627	-0.317	-0.6031	-0.4808	-0.4706	-0.6105	-0.3144	0.07	-0.0967	0.0878	-0.1666	-0.233	0.0628	-0.3974	-0.0898	-0.2172	-0.5804	-0.5325	-0.5373	-0.6723	0.2395	-0.2922	-0.5566	0.0795	0.0437	0.0304	0.2083	0.168	0.6843	0.1329	-0.1689	0.1021	-0.2472	-0.1257	-0.1137	-0.0377	-0.0973	-0.3844	-0.1206	-0.1608	0.1725	0.937	1.2312	-0.1339	0.0194
BP0547	putative lysine decarboxylase	0.0144	0.1939	-0.1429	0.2248	0.1465	0.0636	-0.0711	0.3375	-0.229	-0.5322	0.2042	0.1487	0.3636	-0.0007	0.3113	-0.0426	0.3424	0.0455	0.113	0.1356	-0.2607	-0.0434	0.4366	0.4816	-0.1772	-0.203	0.0031	0.4351	-0.2163	0.1839	0.459	0.2473	0.323	0.0345	-0.0956	0.0296	0.1917	0.0885	0.1392	0.5411	0.2069	0.0757	-0.0003	0.2703	0.2673	0.2489	-0.1734	0.5367
BP0548	hypothetical protein	-0.0527	0.2899	0.392	-0.1207	-0.1002	-0.1947	-0.0055	-0.3186	-0.254	-0.002	0.1258	0.1142	0.1683	0.0659	0.0983	0.1582	-0.0376	0.0787	0.0054	-0.0702	0.0055	-0.0766	0.1774	0.2706	-0.0677	-0.0531	0.0697	0.2746	0.1429	0.0528	0.3013	0.3106	0.135	-0.0432	0.5684	0.0356	-0.0446	0.2056	0.0761	0.1719	0.0204	0.2179	0.0992	0.1908	0.3089	0.5315	0.2279	0.1903
BP0549	probable haloacid dehalogenase-like hydrolase	-0.0043	0.1774	0.6874	-0.169	0.063	-0.4653	-0.3689	-0.4135	-0.3142	-0.4334	0.2627	0.1344	0.1429	0.1764	-0.0384	-0.1873	-0.2106	0.2622	0.0644	-0.035	0.0192	-0.1158	-0.0566	0.2155	-0.0874	-0.1841	0.0844	-0.6402	0.1522	0.2297	0.1284	0.1356	-0.0343	0.1454	0.1401	-0.0914	0.091	0.1003	0.1174	0.0796	-0.2408	0.22	0.162	0.3693	0.2813	0.3015	-0.2874	0.0771
BP0550	conserved hypothetical protein	0.5567	-0.1329	-0.2872	-0.1135	-0.1473	-0.5912	-1.0476	-0.3544	-0.4633	-0.57	0.1858	0.244	0.0955	0.2285	0.0868	-0.6853	0.1844	-0.1014	-0.0972	-0.588	-0.163	-0.6139	-0.323	0.2052	-0.1559	-0.1669	-0.01	-0.1208	0.4774	0.0089	0.4842	0.1746	-0.0862	-0.1811	0.2885	-0.071	-0.0638	-0.1485	-0.2544	0.0468	-0.4884	0.4491	-0.0136	-0.0813	0.3438	0.1583	-0.1511	0.0122
BP0551	methionyl-tRNA formyltransferase	-0.474	-0.6652	-0.0216	-0.6115	-0.2529	-0.4172	-0.6461	-0.4254	-0.5343	-0.7633	-0.2094	-0.4558	-0.4879	-0.4861	-0.7609	-0.2567	-0.4209	-0.371	-0.575	-0.688	-0.4278	-0.4177	-0.6565	-0.3585	-0.6123	-0.6881	-0.7082	-0.5855	0.5254	0.3674	0.3697	-0.0607	-0.5636	-0.6485	-0.2297	-0.7251	-0.6288	-0.4633	-0.3721	-0.6372	-0.3063	-0.3007	-0.4464	-0.5256	-0.0674	0.1218	-0.5025	-0.6216
BP0552	polypeptide deformylase	0.0998	-0.017	0.242	-0.4138	0.0485	-0.4388	-0.362	-0.6619	-0.5028	-0.2619	0.0313	0.128	0.0415	0.0329	-0.3188	-0.4966	-0.5055	-0.2385	-0.3917	-0.6464	-0.449	-0.8952	-1.0649	-0.2832	-0.2124	-0.3331	-0.212	-0.4869	0.4655	-0.1953	-0.0677	0.9472	-0.0662	-0.1622	0.1956	-0.3935	-0.178	-0.1474	-0.1648	-0.3727	-0.7523	0.0469	-0.4007	-0.3056	1.4464	1.1894	-0.216	-0.1361
BP0553	conserved hypothetical protein	-0.0895	0.0185	0.1901	0.0331	-0.0294	-0.8148	-0.7642	-0.0614	-0.4952	-0.6765	-0.1676	0.0421	-0.1253	-0.1331	-0.269	0.0173	-0.133	-0.2976	-0.5191	-0.5253	-0.447	-0.3453	-0.1465	0.1671	-0.3181	-0.3506	-0.3079	0.0589	-0.0027	-0.1368	0.0236	1.2323	-0.1384	-0.4677	-0.0696	-0.5249	-0.3239	-0.4241	-0.2172	0.1031	-0.3174	-0.2315	-0.3502	0.1205	1.1499	1.1354	-0.2761	0.0708
BP0554	leucine-responsive regulatory protein	-0.0027	-0.2594	-0.0122	0.2564	-0.0816	0.3033	-0.4559	0.196	0.0261	-0.5567	-0.0138	0.088	0.2341	0.1634	-0.138	0.1259	0.0266	-0.1771	-0.0077	-0.4136	-0.1228	-0.3152	0.1288	0.5443	-0.1044	-0.0434	0.1112	0.2117	0.0378	-0.0788	0.1099	0.5335	0.1317	-0.0492	0.2748	-0.0789	0.3369	-0.051	-0.0373	0.3037	-0.1385	0.1426	-0.0023	0.1197	0.5118	0.4561	-0.1759	0.3531
BP0555	conserved hypothetical protein	0.4373	-0.6431	-1.1275	-0.2225	-0.0885	-1.0078	-0.9364	-0.1049	-0.5581	-0.7128	0.418	0.3323	-0.2238	0.0412	0.603	-0.3193	0.5894	-0.7152	-0.4093	-0.7602	-0.2696	-0.8262	0.178	0.2951	-0.3936	-0.5318	-0.6346	-0.092	0.2893	-0.9002	-0.076	0.1901	-0.4391	-0.4451	0.0367	-0.3633	-0.439	-0.6924	-0.581	-0.0846	-0.6876	0.3404	-0.4772	-0.5354	0.7903	0.3527	-0.5128	-0.1976
BP0556	hydroxymethylglutaryl-CoA lyase	-0.3232	0.1813	-0.3648	-0.054	0.0762	-0.5879	-0.6332	0.0131	-0.2418	-0.4274	-0.1328	-0.076	0.1639	-0.0444	-0.4359	0.0303	-0.1075	-0.1028	-0.0931	-0.4927	-0.1836	-0.4364	-0.0378	0.1315	-0.2973	-0.4159	0.0782	0.3612	-0.4319	-0.1273	-0.2869	0.7348	0.1605	-0.1947	0.0194	0.0487	-0.024	0.2046	-0.2532	0.1192	-0.2175	-0.1581	0.2646	0.2324	0.3751	0.3358	-0.4237	0.3113
BP0557	putative membrane protein	-0.0299	-0.4596	0.0768	0.0649	0.2678	-0.5317	-0.4719	-0.2545	-0.132	-0.0807	0.1092	0.3553	0.3517	0.0926	0.0136	-0.0197	-0.0147	0.0865	0.0728	-0.2252	-0.0685	-0.3772	-0.0147	0.1907	-0.0588	-0.0856	0.1925	1.0809	0.1745	-0.0333	0.2442	0.4295	0.127	0.1434	0.2173	0.007	-0.123	-0.1059	0.0512	0.2251	-0.1997	0.3055	0.0394	-0.0357	0.6816	0.6114	0.0846	0.0639
BP0558	amino acid-binding periplasmic protein	-0.0574	-0.2661	0.0229	-0.2327	0.066	0.0203	0.2848	0.1504	0.1209	-0.1821	-0.0903	-0.0118	0.1854	-0.1579	-0.1781	0.1038	-0.3419	-0.1688	-0.2533	-0.3255	-0.3388	-0.3374	-0.0846	0.0669	-0.1745	-0.2942	-0.0974	0.0177	-0.1135	-0.1725	0.0425	-0.1219	0.1751	0.1426	-0.1195	-0.2092	0.1698	0.3163	-0.128	-0.0811	-0.2262	-0.1982	-0.217	-0.3366	0.0666	0.3792	0.0641	0.0999
BP0559	probable aminotransferase	-0.5659	-0.222	-0.1078	-0.247	-0.2686	-0.3622	-0.6183	-0.3997	0.0427	-0.5018	0.0193	0.1633	-0.0212	-0.1152	-0.2521	-0.4124	-0.2802	-0.3064	-0.4043	-0.3507	-0.4557	-0.4922	-0.2139	-0.283	-0.4417	-0.4504	-0.3003	-0.4038	0.15	-0.0162	0.3556	0.8782	0.0725	0.2881	0.3956	-0.2149	-0.316	-0.4215	-0.2377	-0.2077	-0.4618	0.0206	-0.2787	-0.0372	0.7911	0.7777	-0.1813	-0.1593
BP0560	conserved hypothetical protein (Pseudogene)	-0.1287	-0.1307	-0.0062	-0.3365	-0.204	-0.524	-0.7001	-0.5413	-0.4587	-0.0636	0.0287	0.0869	0.0625	-0.2341	-0.3101	0.2316	-0.4673	-0.3092	-0.3908	-0.7291	-0.4776	-0.4924	-0.3009	-0.1321	-0.4186	-0.5074	-0.2707	-0.4465	0.0753	0.0731	0.1543	0.8444	-0.0251	-0.2771	0.0163	-0.2695	-0.1722	-0.1794	-0.2354	-0.2018	-0.4233	-0.0672	-0.2753	0.0171	0.8596	0.8445	-0.0127	-0.1564
BP0561	putative exported protein	0.0038	0.0791	0.2349	0.3573	0.1549	0.3551	0.2848	0.5142	0.5089	0.0154	0.2949	0.1655	0.4562	0.4486	0.2223	0.1057	0.4114	0.3082	0.3553	0.0253	0.3436	0.4685	0.5071	0.647	0.2814	0.2711	0.482	0.7229	0.003	0.308	0.1703	0.8279	0.748	0.2934	0.4264	0.3967	0.0499	0.4927	0.4614	0.9321	0.5241	0.3298	0.5564	0.6036	0.6259	0.6878	0.2288	0.8581
BP0562	putative exported protein	0.3378	0.1234	0.9266	-0.2847	0.1737	-0.0564	-0.0182	-0.5371	-0.3053	-0.0235	0.216	0.2898	0.2664	0.403	-0.0083	0.5216	-0.3643	0.3302	-0.1808	-0.444	-0.0831	-0.3917	-0.7599	-0.0654	0.1092	-0.018	0.0527	-0.3614	0.5419	0.0063	0.1112	0.4566	-0.0008	0.0961	0.4487	0.0409	0.2034	0.1871	0.0725	-0.2994	-0.3662	0.54	-0.028	0.237	0.6461	1.1621	0.0914	-0.167
BP0563	probable LysR-family transcriptional regulator	0.0779	0.059	0.9262	-0.1629	0.2739	-0.0309	0.0393	-0.039	0.1155	-0.3861	0.2906	0.2185	0.5071	0.1457	0.1239	0.5008	0.149	0.1151	0.0242	0.2078	-0.0379	0.1516	0.4087	0.5022	0.3146	0.4938	0.4045	0.2914	-0.3005	-0.1827	0.2306	0.4592	0.2445	0.3247	0.5771	0.0646	0.3233	0.4491	0.2822	0.215	0.4879	0.1562	0.0355	0.4711	0.3703	0.8822	-0.1229	0.3509
BP0564	probable transporter	0.1103	-0.0408	0.0984	-0.1964	0.2413	-0.0828	-0.2042	-0.2526	0.1506	-0.262	0.4032	0.1655	0.2329	0.2107	0.3882	-0.3938	0.1036	0.2489	0.1571	0.0525	0.0615	-0.2805	0.109	0.7146	-0.0419	-0.0379	0.0749	-0.0147	0.1234	0.155	0.5617	0.2359	0.3614	0.4167	0.4942	0.1182	0.0349	0.3976	0.1062	0.1135	0.1679	0.3594	0.244	0.1214	0.7555	0.4866	0.206	0.0896
BP0565	transposase	0.4469	-0.7441	-1.2586	-0.8674	-0.2502	-1.094	-1.2358	-1.0218	-1.035	-0.5341	0.0847	0.7576	-0.3666	0.0229	0.4121	-0.6301	0.1668	-0.8433	-0.6391	-1.2332	-0.6556	-1.0272	0.0246	0.1718	-0.847	-0.8836	-1.2173	-0.96	0.1642	-0.756	-0.2366	0.5964	-0.6731	-0.465	0.2195	-0.4701	-0.5248	-0.7644	-1.0976	-0.9733	-1.1309	0.5838	-0.8256	-0.5813	1.0388	0.3733	-1.1763	-1.1205
BP0566	putative dioxygenase	-0.2456	-0.6751	-0.6503	-0.4783	-0.4914	-0.8846	-0.857	-0.3428	-0.6581	-0.7211	-0.0625	0.1249	-0.0016	-0.3186	-0.2299	-0.2627	-0.3357	-0.7491	-0.5437	-0.9575	-0.6106	-0.6189	-0.4554	0.0789	-0.6562	-0.6541	-0.544	-0.3413	-0.3352	-0.5945	-0.197	1.3774	-0.6335	-0.7561	-0.2339	-0.6855	-0.6277	-0.4982	-0.415	-0.034	-0.4147	-0.1814	-0.5077	-0.6185	1.8307	1.8553	-0.4552	-0.1902
BP0567	conserved hypothetical protein	-0.3591	-0.303	0.3042	-0.3823	-0.3195	-0.4669	-0.9248	-0.103	-0.1568	0.0125	0.2543	0.263	-0.2671	0.0142	-0.313	0.2564	-0.2369	0.0275	-0.5594	-0.5581	-0.0596	-0.5426	-0.2137	0.2646	-0.3043	-0.4442	-0.1925	-0.2516	0.0855	0.3063	0.1773	1.9653	-0.6879	-0.3789	-0.0707	-0.2469	-0.0707	-0.2939	-0.6775	-0.0823	-0.454	-0.0168	0.1518	-0.1208	1.6314	1.4156	0.0543	-0.277
BP0568	putative amino acid efflux protein	-0.0353	-0.0237	0.1637	-0.2871	-0.2118	0.0361	-0.3984	-0.4192	0.2139	-0.0614	0.0065	0.1688	0.0999	0.2612	0.138	0.1791	-0.0917	0.3	0.0037	-0.0563	0.1403	-0.268	0.114	0.1083	0.26	0.3157	0.2519	-0.0752	0.1098	-0.1804	-0.2756	0.4671	0.2172	0.4082	0.5329	0.0186	0.0671	-0.073	-0.3126	-0.1028	0.0229	0.3025	0.4951	0.0585	0.5513	0.5282	-0.0279	-0.0857
BP0569	conserved hypothetical protein	0.1036	-0.0605	-0.3101	-0.18	0.0315	-0.163	-0.3674	-0.2592	-0.3223	-0.2335	0.0679	0.255	0.2429	0.1403	0.2607	-0.0107	0.1622	0.1697	-0.0145	-0.0016	0.0929	-0.0551	-0.0043	0.1965	-0.0301	0.0784	0.101	0.0339	-0.0288	-0.3809	-0.1269	0.3245	0.1692	0.2748	0.2552	-0.0695	0.1247	0.1571	-0.3002	0.1196	-0.2501	0.3157	-0.1342	0.1609	0.5103	0.6173	-0.0648	0.0376
BP0570	putative exported protein	0.0856	-0.4268	-0.0918	-0.608	-0.1263	-0.4019	-0.3278	-0.5029	-0.6081	-0.3569	0.2693	0.15	0.0811	-0.0297	-0.074	-0.7312	-0.2749	-0.0804	-0.3804	-0.3365	-0.3323	-0.588	-0.2836	-0.0929	-0.3559	-0.2917	-0.339	-0.4816	-0.0315	-0.2807	0.034	0.9097	-0.246	-0.0411	0.0477	-0.4415	-0.2133	-0.0853	-0.2306	-0.2997	-0.5177	0.0961	-0.2425	0.1694	0.9984	1.0234	-0.2699	-0.1457
BP0571	putative two-component sensor kinase	-0.0208	0.1546	-0.4904	0.1063	0.047	-0.6187	-0.4596	0.0445	-0.2962	-0.6761	-0.082	0.0806	-0.0413	-0.2405	-0.0932	0.0227	0.0167	-0.1727	-0.5562	-1.1347	-0.4274	0.0419	0.3613	0.3637	-0.2517	-0.3014	-0.1989	0.2017	-0.0747	-0.4845	-0.0482	0.5976	-0.1812	-0.5185	-0.0926	-0.4173	0.065	-0.1717	-0.3571	-0.0461	0.0623	-0.2013	-0.2055	0.098	0.7228	0.6245	-0.3581	0.0879
BP0572	putative two-component response regulator	-0.0883	0.0575	0.4472	-0.1697	0.0699	-0.1548	-0.0355	-0.0557	0.2062	-0.0648	0.1974	0.4062	0.1619	0.249	-0.0695	0.1391	-0.1891	-0.0734	-0.1126	-0.4537	0.0853	-0.1768	-0.1781	0.1314	0.0049	0.1374	-0.1158	-0.2888	0.2999	0.455	0.6837	0.7724	0.1436	-0.0858	0.1698	-0.1499	-0.0973	-0.1434	0.0121	-0.1438	-0.2255	0.3328	0.0578	-0.0045	0.8783	0.9861	-0.2416	-0.0973
BP0573	Trk system potassium uptake protein	0.0104	-0.2123	0.1829	-0.1428	-0.0342	-0.3543	-0.339	-0.046	-0.1206	-0.007	0.3347	0.1545	-0.0196	0.0107	0.144	-0.3794	-0.0876	-0.0386	-0.1677	-0.207	0.0762	-0.0098	0.1172	0.0283	-0.1104	-0.077	0.0027	-0.0995	0.3963	0.091	0.4797	0.5977	-0.0848	0.0316	-0.0488	-0.1706	-0.1727	-0.3647	-0.3687	-0.2349	-0.1288	0.2015	0.011	0.1432	0.4573	0.6528	-0.0141	-0.1142
BP0574	Trk system potassium uptake protein	0.0354	0.1568	0.2465	-0.0793	0.0937	-0.1777	-0.0311	-0.2826	-0.1299	-0.014	0.3901	0.1538	0.1688	0.1561	0.129	-0.7687	-0.25	-0.1803	-0.2377	-0.2845	0.0697	-0.2108	-0.307	-0.0378	-0.0828	-0.1058	-0.0763	-0.2141	0.2431	0.0796	0.1575	0.481	0.0186	-0.0832	0.0628	-0.1436	0.0798	-0.0812	-0.0487	-0.1759	-0.5597	0.1554	-0.041	0.1671	0.5524	0.8292	-0.1703	0.0691
BP0575	probable MarR-family transcriptional regulator	-0.1062	0.0589	0.1791	0.0417	-0.0908	-0.4274	-0.2979	-0.0081	-0.1081	0.0213	0.1506	0.1641	-0.0074	0.0624	-0.3429	-0.3496	-0.2853	0.2117	-0.0154	-0.5993	0.0008	-0.3372	-0.2132	0.2942	0.0205	0.0151	0.2504	0.0683	0.0747	0.1816	0.0352	0.8868	0.0223	-0.4166	0.0194	-0.1164	-0.0455	0.1835	-0.1552	0.0957	-0.0169	-0.045	0.1077	0.2466	0.8081	0.8815	0.2539	0.1488
BP0576	conserved hypothetical protein	-0.0573	-0.1471	-0.1278	0.2226	-0.0602	-0.5736	-0.4974	0.0715	0.1557	-0.0549	-0.1155	0.1914	0.0845	0.0992	-0.2401	1.2092	-0.0386	-0.1404	-0.1572	-0.552	0.0085	0.0424	0.0827	0.3938	-0.0725	-0.1212	0.0595	0.2492	0.0111	-0.2057	-0.1451	0.9584	0.2459	-0.1985	0.1345	-0.1021	-0.0957	-0.1213	-0.1402	0.3175	-0.0439	0.1018	0.3064	0.3888	0.8902	1.0001	0.0484	0.3781
BP0577	conserved hypothetical protein	0.3164	-0.1099	0.8782	-0.4189	-0.0074	-0.134	-0.1429	-0.4769	-0.2997	-0.7746	0.6303	-0.0547	-0.0281	0.1053	0.1618	0.2164	-0.1065	-0.0278	-0.5685	0.5086	-0.2213	-0.1119	0.4715	0.2272	-0.099	0.5907	0.0544	-0.1032	-0.0503	-0.3439	1.0022	0.75	-0.4459	0.2566	0.2878	-0.3522	-0.2441	-0.1656	-0.1354	-0.3337	-0.1953	0.2013	-0.3177	0.4761	0.8058	1.514	-0.1935	-0.1846
BP0578	conserved hypothetical protein	0.4336	-0.654	-0.8743	-0.3398	0.2076	-0.6895	-1.2296	-0.1321	0.0331	0.1412	-0.0448	0.8569	-0.0913	0.3247	0.4102	0.5807	-0.1253	-0.5848	0.0545	-0.2972	-0.1249	-0.585	-0.3009	0.3514	-0.3007	-0.6277	-0.776	0.2626	0.4969	-0.6246	-0.2149	0.2695	-0.2055	-0.0369	0.5623	0.0127	-0.4079	-0.3403	-0.5173	-0.4934	-0.6448	0.6087	0.1674	-0.5732	0.8604	0.98	-0.1718	-0.8018
BP0579	maleate cis-trans isomerase	0.1442	-0.5331	-1.409	-0.6108	-0.1891	-0.7729	-1.272	-0.6355	-1.194	-1.0836	0.2414	0.1623	-0.0896	-0.2183	0.4568	0.317	0.3291	-1.369	-0.4361	-0.2959	-0.728	-1.2199	0.6942	0.398	-0.6368	-0.4948	-0.8929	-0.4677	-0.6127	-1.048	-0.0754	0.1481	-0.322	0.1589	-0.0611	-0.0659	-0.9587	-0.8506	-1.7356	-1.0763	-1.2788	-0.7018	-1.776	-1.0458	-0.2207	-0.6036	-1.9428	-0.8538
BP0580	probable hydrolase (Pseudogene)	0.127	-0.1376	-0.2758	-0.1096	-0.0934	-0.6159	-0.7174	0.1108	-0.2071	-0.8818	0.1722	0.2659	-0.1421	0.0115	0.054	0.3128	0.3926	-0.3231	-0.2322	-0.0448	-0.071	-0.1224	0.2014	0.4156	0.0701	0.2418	0.0528	0.2	-0.1187	-0.6265	0.0175	0.2422	-0.3565	0.1691	0.0795	-0.0796	-0.5446	-0.4361	-0.6615	-0.1142	-0.099	-0.4192	-0.7871	-0.4754	-0.1064	-0.4828	-0.9119	0.1367
BP0581	conserved hypothetical protein	0.1864	-0.1768	-0.1923	-0.4852	0.0304	-0.2927	-0.2585	-0.3149	-0.2111	-0.3744	0.2974	0.0486	0.1752	0.0057	0.2246	0.0643	0.0672	0.089	-0.0944	-0.2478	-0.0035	0.0751	0.2644	0.4491	0.1009	0.1693	0.1578	-0.0007	-0.4281	-0.5425	0.2451	0.2471	-0.0018	-0.1232	0.1829	0.0231	-0.1176	0.0046	-0.2438	-0.2394	0.0214	-0.212	-0.3005	-0.1179	0.0975	0.0961	0.0322	-0.3219
BP0582	putative isochorismatase	0.0938	-0.1453	-0.5268	-0.1823	0.2621	-0.2885	-0.1573	-0.2218	-0.1247	-0.4098	0.1762	0.2068	0.0929	0.2043	0.4057	-0.672	0.0974	-0.3525	0.0374	-0.1851	-0.1986	-0.074	0.138	0.1861	-0.1317	-0.1184	-0.0574	0.0604	0.116	-0.3234	0.1852	0.1611	0.307	0.0847	0.2944	0.1709	-0.5869	-0.6743	-0.803	-0.3447	-0.4712	-0.2552	-0.5479	-0.7308	0.0933	-0.3618	-0.3579	-0.4053
BP0583	probable ring hydroxylating beta subunit	0.0041	-0.6807	-0.5422	-0.4137	-0.4457	-0.6409	-0.6761	-0.0755	-0.2748	-0.4986	-0.1191	0.2479	-0.4674	0.0107	0.4781	-0.074	0.1305	-0.5984	-0.5695	-1.1835	-0.3153	-0.6966	0.0763	0.2352	-0.3069	-0.5027	-0.475	-0.1533	0.1957	-0.487	-0.6052	0.2932	-0.6907	-0.6647	0.0033	-0.5558	-0.2035	-0.5877	-0.7612	0.0085	-0.6355	0.3444	-0.3926	-0.4423	0.7659	0.6069	-0.3791	-0.2057
BP0584	probable Ring hydroxylating alpha subunit	-0.0538	-1.0625	-0.6897	-0.8303	-0.1647	-0.4272	-1.0324	-0.4754	-0.5107	-0.4664	0.0293	0.1059	-0.283	-0.0613	0.2219	-0.2696	-0.1909	-0.8189	-0.6963	-0.5186	-0.5034	-0.7218	-0.1213	-0.242	-0.5962	-0.7338	-0.6581	-0.3279	-0.2037	-0.9461	-0.3703	0.0132	-0.3495	-0.1379	0.1119	-0.2313	-0.0925	-0.6358	-0.7893	-0.4056	-0.3951	0.171	-0.247	-0.8796	0.5402	0.5444	-0.6304	-0.428
BP0585	putative ferredoxin reductase	0.1822	-0.7068	-1.0986	-0.8015	-0.2144	-0.6153	-0.9349	-0.6682	-0.5366	-0.2754	0.0342	0.1864	-0.3591	0.0334	0.3889	0.0479	-0.1008	-0.6808	-0.497	-0.8904	-0.5404	-0.7176	0.11	-0.1116	-0.3937	-0.5747	-0.7601	-1.0801	0.0873	-0.7067	-0.2152	0.102	-0.3171	-0.1558	0.1885	-0.4075	-0.0641	-0.6685	-0.9195	-0.8853	-0.6682	0.3428	-0.4731	-0.5565	0.7389	0.4682	-0.5644	-0.8886
BP0586	ferredoxin	0.4065	-0.3455	-0.1731	-0.5162	0.1875	0.1685	-0.1393	0.4489	0.7779	-0.037	0.1267	0.3148	0.0082	0.0987	0.751	0.1413	0.3396	-0.2737	-0.1879	-0.6389	-0.0782	0.0203	0.0849	0.9063	0.284	-0.0722	0.1621	0.2255	0.1516	-0.5158	0.1349	0.9174	0.0609	-0.2754	0.6169	0.0919	-0.2692	-0.6234	0.0626	0.4603	0.3138	0.3048	0.7568	-0.5005	0.7549	0.7329	0.0831	0.2113
BP0589	putative exported protein	-0.097	-0.1977	-0.5105	-0.139	-0.3152	-0.3042	-0.2471	0.2956	-0.1282	-0.7102	-0.1606	0.0855	0.0113	-0.1488	0.1799	0.1339	0.0805	-0.5294	-0.5259	-0.2415	-0.334	0.0717	0.2443	0.5614	-0.2032	-0.107	-0.3691	0.2262	-0.4393	-0.5997	-0.2903	0.0509	-0.3275	-0.1379	-0.0321	-0.6356	0.0475	0.3421	-0.2074	0.0928	0.2475	0.0352	-0.1762	-0.0086	0.717	0.3292	-0.4111	0.1956
BP0590	oxidoreductase, large chain	-0.0565	-0.0168	-0.0097	-0.4335	0.1128	0.0118	-0.0615	-0.021	-0.1152	-0.6481	0.2555	0.118	0.2332	0.0988	0.1726	0.06	-0.108	-0.1149	-0.0701	-0.0419	-0.1747	-0.1659	0.1248	0.3228	-0.2136	-0.2211	0.0634	-0.009	-0.1834	-0.2022	0.5031	0.2713	0.218	0.082	0.0646	0.2391	-0.0024	-0.0211	-0.0804	0.1149	0.0793	0.019	-0.0725	-0.039	0.4659	0.4676	-0.1847	-0.0532
BP0591	oxidoreductase, medium chain	-0.1038	-0.5276	0.0681	-0.1506	-0.0472	-0.5566	-0.4863	-0.1183	-0.0232	-0.2159	0.037	0.0684	0.1171	0.1137	-0.1801	0.0799	0.1287	0.0011	-0.1735	-0.1531	-0.0589	0.1244	0.4035	0.4125	-0.0432	0.2155	0.0168	0.2335	-0.4527	-0.2303	0.2206	0.4401	-0.1039	0.047	0.3172	-0.0813	0.008	0.3253	-0.1562	0.1546	0.5028	0.0919	0.0538	0.3756	0.4264	0.3054	0.1241	0.4103
BP0592	putative iron-sulfur binding protein	-0.1367	0.0178	0.385	-0.2097	0.0903	-0.052	-0.043	-0.0596	0.051	-0.3718	0.0871	-0.0687	0.2673	0.0936	-0.1877	0.3708	-0.0129	0.1579	-0.179	-0.1925	0.0032	-0.0309	-0.2063	0.1038	0.1786	0.2029	0.3757	0.0688	-0.1169	-0.051	0.2476	0.4194	0.0699	0.1053	0.4599	-0.1788	0.165	0.2869	0.1647	0.1182	0.2878	0.0466	0.0805	0.1649	0.3851	0.5599	0.143	0.2482
BP0593	putative exported protein	0.1518	0.0459	0.3028	-0.1674	0.4152	-0.0458	0.0111	0.0596	0.3918	0.1268	0.1148	0.3997	0.5387	0.4774	0.2925	0.2292	0.1554	0.3591	0.202	-0.3494	0.1944	0.0517	-0.2207	0.3533	0.0948	0.1793	0.7353	-0.004	0.372	0.2997	0.3165	0.6403	0.1986	0.3133	0.5025	0.4398	0.2795	0.0958	0.234	0.1122	0.1678	0.6497	0.3813	0.1978	0.775	0.6804	0.687	0.2179
BP0594	probable ABC transporter, ATP-binding component	0.1719	-0.2293	0.1389	-0.3861	0.149	-0.4486	-0.3339	-0.4302	-0.1217	0.3278	0.2192	0.4453	-0.0572	0.309	0.2775	1.3058	0.1414	-0.2438	-0.3205	0.0018	0.052	0.0471	0.1616	0.3926	-0.1054	0.1326	-0.1631	0.1392	-0.0823	-0.3045	0.0384	0.3383	-0.198	0.2315	0.3041	-0.0217	0.0342	0.2582	-0.704	-0.1861	-0.1115	0.233	-0.0062	0.1885	0.6364	0.3686	-0.0062	-0.2423
BP0595	ABC transporter, permease component	0.097	0.235	0.576	-0.4262	0.0677	0.3216	0.1664	-0.418	-0.4618	-0.5143	0.824	0.1294	0.5687	0.1091	0.2808	0.535	-0.031	0.2144	-0.1438	0.5391	-0.147	-0.1093	0.0867	0.181	0.0948	0.472	0.2029	-0.0175	-0.1014	-0.1579	0.7655	0.3772	0.0792	0.5562	0.4105	-0.0749	-0.0671	0.374	0.1534	-0.0947	0.1924	0.0609	-0.3722	0.6031	0.6353	0.8152	-0.1843	-0.027
BP0596	putative membrane protein	0.0931	0.054	-0.1716	-0.2044	0.1927	0.0844	0.367	0.2134	0.3017	0.0913	0.2076	0.1757	0.2052	0.262	0.4881	0.948	0.3207	0.2503	-0.0713	0.2882	0.2454	0.054	0.1422	0.1463	0.2028	-0.1117	0.1229	0.1892	-0.164	-0.5583	-0.3974	-0.0845	0.186	0.6739	0.2979	0.1311	0.4761	0.3363	0.3395	0.2288	0.3021	0.2885	0.3539	-0.2693	0.1684	0.3117	0.5062	0.0752
BP0597	putative membrane protein	0.4654	0.2001	0.9504	-0.2027	0.1245	-0.2649	0.1187	-0.4358	-0.5745	-0.8068	0.7139	0.1812	0.4813	-0.2785	0.1794	-0.2204	-0.0738	-0.11	-0.1762	0.253	-0.5267	0.0041	0.4501	0.4184	0.092	0.2999	-0.0216	0.1387	-0.9565	-0.5329	0.3945	0.2357	-0.122	0.6059	0.1603	-0.0796	-0.0042	0.2704	0.2582	0.0356	0.0301	-0.1745	-0.338	0.4175	0.3807	1.1462	-0.1486	0.1868
BP0598	conserved hypothetical protein	-0.4621	-0.4346	-0.3319	-0.7293	-0.5383	-0.4627	-0.2988	-0.4663	-0.5676	-0.3435	-0.2973	-0.2752	-0.3172	-0.0357	-0.1747	-0.2354	-0.4109	-0.1912	-0.4288	-0.3767	-0.1958	-0.4746	-0.6069	-0.2601	-0.1809	-0.3509	-0.0944	-0.1271	0.0817	-0.1824	-0.0449	1.1	-0.1224	-0.0739	0.0124	-0.281	0.0221	-0.1186	-0.2251	-0.3451	-0.3389	-0.1512	-0.0697	0.1387	1.3038	1.2765	-0.1482	-0.2867
BP0599	conserved hypothetical protein	0.2479	0.2119	0.5739	-0.286	0.0842	-0.5129	-0.6636	-0.8114	-0.4178	0.2478	-0.0643	0.1788	0.0465	0.1236	-0.2619	-0.0036	-0.451	0.011	-0.2097	-0.2656	-0.1528	-0.5326	-0.5352	-0.2503	-0.177	-0.1925	-0.1741	-0.4345	0.3468	0.0164	0.1931	0.2787	-0.0194	-0.3075	0.1777	-0.2313	0.0767	-0.1918	-0.5548	-0.3359	-0.6077	0.1646	0.0085	0.037	0.7691	0.95	0.0908	-0.2315
BP0600	conserved hypothetical protein	0.259	-0.3277	-0.7667	-0.6495	0.1984	-0.8356	-1.103	-0.2209	-0.0709	-0.2271	0.1977	0.4323	-0.0757	0.345	0.6182	-0.1051	0.1391	-0.2847	-0.6961	-0.8192	0.1164	-0.3977	-0.5606	-0.0255	0.1503	0.0544	-0.214	-0.3587	0.5784	-0.1224	-0.3416	0.7562	-0.2216	-0.0295	0.2694	-0.05	-0.4725	-0.2775	-0.6331	-0.3273	-0.0359	0.4721	0.3067	-0.4602	0.9166	0.7546	-0.34	-0.2616
BP0601	rRNA methylase	-0.5055	0.0448	0.3179	-0.1477	-0.0069	-0.3913	-0.2083	-0.2268	0.2226	-0.1732	-0.1467	0.4115	0.1996	0.2994	-0.062	-0.0411	0.0704	0.3609	-0.033	-0.2945	0.1295	0.2863	0.2894	0.3077	0.2461	0.1205	0.2146	0.1347	0.1963	-0.0946	-0.2147	0.4528	0.2838	0.019	0.3281	-0.0991	0.1788	0.1987	-0.2804	0.1186	0.2417	0.3888	0.4459	0.2584	0.4841	0.5561	-0.027	0.2343
BP0602	putative exported protein (Pseudogene)	-0.1774	-0.1446	-0.2036	-0.2049	0.0299	-0.4955	-0.4548	-0.1955	-0.3855	-0.4674	0.2428	0.1519	0.1806	0.073	0.3089	0.0948	0.0756	0.0475	0.0962	-0.1898	-0.2452	-0.4294	-0.0328	0.2735	-0.1245	-0.2919	0.0697	0.2826	-0.1175	-0.1856	-0.1855	0.2025	0.0551	0.036	0.0955	0.016	-0.0418	0.0253	0.0822	0.2794	-0.1621	0.1977	0.0114	-0.0836	0.3629	0.1249	-0.1472	0.3639
BP0603	glycerol-3-phosphate dehydrogenase [NAD(P)+]	-0.2976	-0.4112	-0.4657	-0.0881	-0.0808	-0.1932	-0.1398	0.1972	-0.0591	-0.5414	-0.0548	0.035	-0.1719	0.2779	0.233	0.1376	0.2459	-0.112	0.1542	-0.0148	-0.0443	-0.1672	0.2626	0.557	-0.0471	-0.1083	-0.0624	0.3578	-0.9174	-0.3025	-0.0117	0.3202	0.1762	-0.0663	0.1207	0.0979	-0.132	0.3817	0.2461	0.5903	0.1652	0.2627	0.2372	0.088	0.4735	0.337	-0.1673	0.5263
BP0604	protein-export protein	-0.1892	0.0118	-0.0845	0.0301	-0.1174	-0.0713	-0.1193	-0.0272	-0.1679	-0.341	0.1701	0.4377	0.384	0.3824	0.2152	-0.165	0.2182	0.1341	0.2676	0.0844	0.1516	-0.1076	-0.2059	0.2782	-0.0361	0.1468	0.2193	0.3106	0.0244	0.0391	-0.126	-0.048	0.4409	0.2846	0.3414	0.3153	0.1403	0.1615	0.1785	0.3923	-0.0169	0.5537	0.0033	0.1009	0.0032	-0.2537	-0.1593	0.5388
BP0605	glutaredoxin 3	-0.4087	-0.3998	-0.4451	0.0318	-0.1619	-0.4829	-0.467	0.2046	-0.1583	-0.7521	-0.0525	0.1777	0.2184	0.1649	-0.0619	0.2426	0.2778	0.0224	0.0765	-0.3236	-0.1133	-0.1566	0.1527	0.4882	-0.1822	-0.2973	-0.0005	0.4602	0.0399	-0.3178	-0.2066	0.1774	0.2388	0.0727	0.1197	0.0719	-0.0896	0.3327	0.084	0.584	0.0251	0.2344	-0.0677	0.0426	0.2649	0.1059	-0.5368	0.6195
BP0606	conserved hypothetical protein	-0.1874	-0.2326	-0.3897	0.0613	-0.2484	-0.5359	-0.3775	0.1862	-0.0636	-0.5729	-0.0576	0.1324	-0.1403	0.2773	-0.0468	0.0415	0.3115	-0.1207	-0.0595	0.037	-0.0205	0.0966	0.589	0.4883	0.1164	0.4209	0.1137	0.3685	-0.2355	-0.39	-0.2369	0.3067	0.0537	0.0784	0.2736	-0.0269	0.0007	0.0665	0.0851	0.5265	0.124	0.0775	0.1028	-0.0282	0.3791	0.2608	-0.2722	0.4767
BP0607	phosphoglycerate mutase 1	-0.0201	-0.0045	-0.4572	0.2073	-0.0098	-0.3294	-0.4796	0.3669	-0.1193	-0.4261	0.0569	0.0845	0.1326	0.0637	0.1034	-0.0651	0.4006	-0.0547	0.0665	-0.1233	-0.2462	0.0567	0.3115	0.4718	-0.1097	-0.1571	-0.123	0.5258	-0.0781	0.0781	0.2084	0.0303	0.3347	0.0245	-0.0003	0.1171	0.0777	0.1631	-0.0767	0.6234	0.1495	0.0205	-0.0089	0.0058	0.3224	-0.0491	-0.0031	0.7757
BP0608	putative peptidase	-0.0078	-0.33	-0.1516	0.0215	-0.149	-0.1555	-0.3162	0.2163	-0.1671	-0.7202	0.1322	-0.0585	-0.0471	0.0032	-0.1346	0.2402	0.2494	-0.0931	-0.4078	-0.3476	-0.1828	0.0366	0.8748	0.5992	-0.148	0.0866	0.1426	0.1695	-0.0083	-0.257	0.565	1.1125	-0.1124	-0.1406	0.144	-0.3501	-0.1824	-0.0793	0.0182	0.3534	0.1567	0.0653	-0.0012	0.3658	1.0203	0.935	-0.2533	0.367
BP0609	putative carboxy-terminal processing protease precursor	-0.05	-0.0005	0.455	-0.3273	-0.0544	-0.206	-0.1082	-0.3227	-0.1409	-0.3848	0.2053	0.3057	0.0847	0.2331	-0.0638	0.2137	-0.1271	0.0278	-0.1043	-0.1336	-0.1264	-0.1686	0.1851	0.2764	-0.0167	0.2339	0.0398	0.0871	0.0963	-0.0883	0.5079	0.7488	-0.0262	-0.0735	0.3648	-0.159	-0.0277	-0.0035	0.0669	0.0007	-0.1919	0.1541	-0.0617	0.2254	0.7529	0.906	-0.1677	0.1849
BP0610	adenylyltransferase	0.1041	-0.063	0.1081	-0.1715	0.1657	-0.1815	-0.3496	-0.0355	-0.086	-0.3784	0.317	0.277	0.0253	0.1744	0.0809	0.0815	0.0631	0.1071	-0.2075	-0.0389	-0.0372	-0.1107	-0.0093	0.331	0.0492	-0.0074	0.042	0.0315	0.4179	-0.0279	0.6502	0.6241	0.0319	0.0511	0.3739	-0.2058	0.0285	-0.0911	-0.104	0.0538	-0.0502	0.2438	0.1125	0.0024	0.7295	0.7575	0.0507	0.0336
BP0612	putative exported protein	0.1735	0.1679	-0.2964	0.2296	0.1327	-0.3702	-0.4779	0.499	-0.0718	-0.6142	0.2877	0.204	0.2846	0.2523	0.3766	0.0054	0.4951	-0.0502	0.0779	-0.4929	0.186	0.1332	0.4993	0.7427	0.1897	0.1269	0.3159	0.7683	0.042	-0.0955	0.1969	0.7993	0.1711	-0.3127	0.2263	0.065	0.0633	0.1245	-0.0875	0.8105	0.2074	0.2965	0.2227	0.5319	0.7706	0.5675	-0.265	0.6735
BP0613	probable transcriptional regulator	-0.0757	-0.2191	-0.1978	-0.4363	0.2102	-0.5038	-0.6994	-0.6284	-0.5985	-0.18	0.2447	0.2669	-0.0003	0.2114	0.0499	0.4158	-0.2824	-0.1266	-0.1983	-0.0524	-0.0967	-0.4284	-0.0349	0.0849	-0.0931	-0.2428	-0.0956	-0.2163	-0.0235	-0.1034	0.113	1.5528	-0.1089	0.0698	0.2641	-0.099	0.002	0.0585	-0.3293	-0.117	-0.1792	0.2854	-0.0086	0.123	1.6615	1.7856	-0.3811	-0.1576
BP0614	putative exported protein (Pseudogene)	0.1632	-0.4489	0.1396	-0.6258	0.0801	-0.1066	0.0244	-0.2246	-0.5328	-0.3035	0.1938	0.2649	0.003	0.0367	0.617	0.1372	0.1149	-0.3743	-0.2931	-0.2541	-0.421	-0.3459	0.3471	0.218	-0.0432	-0.2937	0.0588	-0.6453	-0.0009	-0.5944	-0.0063	0.5049	-0.2075	0.2015	0.3176	-0.0292	0.1014	-0.0502	-0.1388	-0.407	-0.1543	0.3333	-0.479	-0.3629	0.8368	0.8272	-0.3471	-0.0963
BP0615	putative exported protein	-0.1243	-0.2788	0.4152	-0.185	-0.1831	0.1607	0.7681	0.1737	0.1519	-0.4782	0.5577	0.0923	0.0951	0.1956	0.3258	0.126	-0.0043	0.3565	-0.1071	0.0208	0.1688	0.2123	0.1247	0.2116	0.1004	0.3026	0.1562	0.4417	0.1386	-0.0461	0.4764	0.3094	0.2909	-0.0266	0.2774	0.0416	0.0252	0.5026	0.1008	0.2949	-0.0177	0.26	0.3522	0.1197	0.2223	0.5727	0.1391	0.2405
BP0616	conserved hypothetical protein	1.0915	-0.4876	-0.8579	-0.6331	0.0324	-0.3381	-0.3891	-0.1383	-0.1333	-0.4023	0.5436	0.6525	0.0019	0.4806	0.5667	0.5423	0.439	-0.4729	-0.4108	-0.5558	-0.1605	-0.1811	0.0609	0.3005	-0.1437	-0.1306	-0.0867	-0.2487	0.3221	-0.9862	-0.4414	0.4733	-0.4121	0.0563	0.4154	-0.1844	-0.1154	-0.3621	-0.5452	-0.0063	-0.3596	0.751	-0.4293	-0.468	0.8063	0.7417	-0.124	-0.7755
BP0617	TetR-family transcriptional regulator	0.323	0.3285	0.5936	-0.0288	0.2507	0.263	0.2451	0.1005	0.3267	0.3762	0.3753	0.2932	0.3785	0.2677	0.2479	0.2013	0.0757	0.3953	0.2795	0.2235	0.307	0.112	0.4507	0.4007	0.3237	0.5835	0.6225	0.3578	-0.1834	-0.1241	0.2805	0.02	0.4616	0.4409	0.4076	0.1495	0.4131	0.5	0.3107	0.3357	0.2595	0.2441	0.5769	0.1651	0.285	0.4609	0.9491	0.3167
BP0618	dihydrolipoamide dehydrogenase	0.4704	0.121	0.3782	0.139	0.1409	-0.1971	-0.3465	0.1615	0.1997	-0.4817	0.2953	0.3102	0.4325	0.3414	0.0969	0.818	0.3274	0.3763	0.035	-0.1976	0.2337	0.0303	0.0811	0.7397	0.2688	0.3457	0.4147	0.5121	0.284	0.0665	0.9205	0.6444	0.3003	-0.1268	0.4114	0.2619	0.1832	0.3859	0.2124	0.5245	0.2209	0.248	0.3096	0.4061	0.732	0.6862	-0.044	0.52
BP0619	branched-chain amino acid ABC transporter, ATP-binding protein	0.2643	0.1736	0.5687	-0.1455	0.0429	-0.0287	0.0444	-0.1283	-0.4948	-1.1051	0.6737	0.1893	0.1482	-0.3334	0.1533	0.4186	0.3213	-0.2681	-0.4127	0.3237	-0.4344	-0.0208	0.9374	0.3998	-0.0036	0.5031	-0.0087	0.1733	-0.7728	-0.5704	0.5856	0.1438	-0.2469	0.3686	0.0849	-0.2795	0.0352	0.1582	-0.2781	0.3082	0.27	-0.1421	-0.433	0.1086	0.3759	0.7988	-0.0649	0.3619
BP0620	branched-chain amino acid ABC transporter, permease protein	0.4025	-0.8072	-1.1682	-1.2216	-0.0909	-0.7813	-0.8872	-1.4473	-1.1503	0.2085	0.2108	0.7698	-0.1246	0.0699	0.8299	0.7785	-0.1009	-1.1595	-0.7785	-0.2712	-0.6477	-1.0278	-0.1744	-0.6192	-0.5745	-0.8883	-1.2906	-1.4176	0.3952	-1.2635	-0.3408	-0.0569	-0.306	0.3763	0.3094	0.0645	-0.4321	-0.9086	-0.6546	-1.51	-1.1556	0.529	-1.2521	-0.7056	0.8452	0.8298	-0.8188	-1.3018
BP0621	branched-chain amino acid ABC transporter, permease protein	0.5444	-0.4346	-0.9214	-0.2392	0.0839	-0.2647	-1.2587	-0.4556	-0.5658	-0.3353	0.4493	0.7433	0.2425	0.2702	0.8311	0.5208	0.5631	-0.7722	-0.1751	-0.1394	-0.1727	-0.791	0.2714	0.3275	-0.3739	-0.4403	-0.7781	-0.189	0.2793	-0.4756	0.0429	0.3201	-0.1879	0.3333	0.4827	-0.0505	-0.243	-0.418	-0.8556	-0.2671	-1.2331	0.5149	-0.5633	-0.5742	0.7767	0.7699	-0.4283	0.0759
BP0622	putative leu/ile/val-binding protein precursor	0.4228	-0.3037	-0.5919	-0.5892	0.0141	-0.4424	-0.8569	-0.5353	-0.3914	0.2747	0.4505	0.3474	0.0175	0.1009	0.6931	0.2326	0.0789	-1.0567	-0.2419	-0.752	-0.2662	-0.6025	0.0113	0.4301	-0.3311	-0.5504	-1.02	-0.7133	0.0714	-0.4797	-0.2219	0.3604	-0.5292	0.0807	0.334	-0.0966	-0.5231	-0.5499	-0.9628	-0.6666	-0.9644	0.3627	-0.463	-0.4041	0.7418	0.7254	-0.5171	-0.6135
BP0623	conserved hypothetical protein (Pseudogene)	0.4474	0.2241	0.4291	-0.3015	0.5645	0.0678	-0.4332	0.0867	0.385	0.9375	0.5588	1.1277	0.2092	0.2914	0.595	0.4383	0.1361	-0.0523	-0.114	-0.5649	-0.1217	-0.1582	-0.2081	0.1287	0.0999	-0.1981	-0.5321	-0.4643	0.4125	-0.0479	0.0801	0.5873	0.0228	-0.1305	0.3901	-0.0582	-0.3132	-0.4435	-0.2351	-0.3547	-0.1401	0.4733	0.3389	-0.1475	0.8275	0.7982	-0.0584	-0.5496
BP0624	putative substrate-CoA ligase	0.0478	0.5926	0.813	0.3735	0.1686	0.321	0.1991	0.6221	0.8137	0.7622	0.8995	0.8425	0.932	0.6166	0.3662	0.3328	0.2153	0.1881	0.1327	0.0982	0.2973	-0.3776	0.0907	0.1614	0.1174	-0.1507	0.0537	0.1361	0.264	-0.0108	0.3004	0.4252	0.1381	0.1957	0.6026	0.1502	0.1651	0.2536	0.0327	0.3697	0.0542	0.1666	0.351	0.1361	0.5925	0.4354	0.2459	0.2161
BP0625	probable acyl-CoA dehydrogenase	0.3365	0.7543	0.6392	0.2024	0.3659	0.583	0.3638	0.3294	0.7304	0.3988	0.7649	0.6638	1.045	0.2343	0.0597	0.214	-0.0108	0.0864	0.3272	0.2405	0.2156	-0.2238	-0.3112	0.2337	0.0265	-0.1557	-0.126	-0.1831	0.1951	0.261	0.5747	0.4895	0.0635	0.108	0.3935	-0.0784	0.0885	0.3342	0.2248	0.4221	-0.111	0.239	-0.041	0.1946	0.6132	0.5549	-0.0438	0.1944
BP0626	probable 2-oxo acid dehydrogenases acyltransferase (pseudogene)	0.6378	0.4238	0.1565	0.6467	0.2829	0.5104	0.3258	1.4059	0.9127	0.4152	0.669	0.784	0.9168	0.1754	0.3391	0.5512	0.4876	0.0917	0.2449	0.1863	0.2661	0.2358	0.44	0.5301	-0.0417	0.0801	-0.1167	0.3614	0.397	0.2537	0.6647	0.6207	0.3383	0.1453	0.2759	0.1604	-0.1343	0.1545	0.1099	0.9576	0.3177	0.1909	0.1829	-0.0762	0.5346	0.3295	-0.0647	0.6138
BP0627	probable enoyl-CoA hydratase/isomerase	0.4319	0.0179	0.4681	-0.0981	0.0958	0.0369	0.2095	0.2213	0.3791	-0.2168	0.8289	0.5713	0.9147	0.0705	0.2106	0.3137	0.1254	0.0423	0.0435	0.3904	0	-0.1121	0.3842	0.2584	0.0441	0.1484	0.1488	-0.0549	-0.0524	0.0594	0.744	0.3992	0.1545	0.3264	0.2883	-0.0476	-0.0168	0.1385	0.2179	0.2802	0.366	0.1536	-0.0341	0.0919	0.6614	0.6082	-0.1215	0.2057
BP0628	putative pyruvate dehydrogenase E1 beta subunit	0.4594	0.5235	0.7403	0.4945	0.4681	0.4845	0.5423	1.052	1.3008	0.7569	0.8799	1.0532	1.4334	0.2393	0.2047	0.3499	0.095	0.4687	0.2424	0.4104	0.3609	-0.2737	-0.1795	0.2154	-0.1245	-0.197	-0.114	-0.0207	0.6211	0.5051	0.8651	0.412	0.3954	0.4324	0.5366	0.1648	0.1059	0.3372	0.5318	0.5765	0.0818	0.2299	0.2766	0.2008	0.6734	0.9987	0.3234	0.4125
BP0629	putative pyruvate dehydrogenase E1 component, alpha subunit	0.2327	0.5822	0.4681	0.0192	0.1794	0.3665	0.3633	0.6671	0.8266	0.6034	0.8085	0.7952	0.9637	0.3252	0.1798	-0.0117	0.2077	0.1182	0.3338	0.2453	0.1643	-0.2367	-0.0735	0.1101	0.0781	-0.1321	0.0958	-0.0942	0.3639	0.1421	0.4533	0.491	0.1505	0.3072	0.537	0.2084	0.133	0.2435	0.2884	0.3908	-0.0015	0.338	0.1924	0.0944	0.7779	0.5254	0.004	0.1937
BP0630	probable transcriptional regulator	0.0584	0.2222	0.3663	0.0149	0.0843	0.1532	0.1963	0.3615	0.2717	0.0413	0.1205	0.1208	0.2534	0.2234	0.0957	0.2248	0.2045	0.3456	0.1281	-0.0356	0.0884	0.0402	0.2017	0.5363	0.1318	0.1657	0.4442	0.4156	0.0593	0.0088	0.2409	0.7285	0.3297	0.1361	0.4369	0.0344	0.2338	0.4695	0.2403	0.3126	0.3359	0.17	0.3224	0.1041	0.8485	0.9953	0.2164	0.2725
BP0631	C-terminal region of a putative enoyl-CoA hydratase/isomerase (Pseudogene)	0.1335	0.1955	0.177	-0.2747	-0.1042	0.0178	-0.0869	-0.1265	-0.0382	-0.1323	0.4213	0.2752	0.084	0.289	0.2268	0.3294	0.3126	-0.0147	0.016	0.1188	0.0196	0.0674	0.8059	0.5056	0.2013	0.2084	0.605	0.2345	0.0339	-0.1312	0.4485	0.497	0.2261	-0.0002	0.1865	-0.0428	-0.1047	0.2401	-0.0029	0.3316	0.1818	0.3011	0.2224	0.2562	0.8556	0.7472	-0.2017	0.0313
BP0632	C-terminus truncated putative pimeloyl-CoA synthetase (Pseudogene)	0.384	-0.045	-0.2435	-0.2847	0.1144	-0.4861	-0.609	0.1293	0.3322	0.0826	0.6514	0.4958	0.2787	0.2375	0.5466	0.2483	0.1542	-0.0462	-0.1712	-0.3671	-0.2247	-0.0008	0.1236	0.4203	0.0562	0.4328	0.1864	0.1265	0.2302	-0.2915	0.0754	0.2007	0.2995	0.1056	0.3131	0.2155	-0.1199	0.1202	-0.033	0.2995	-0.0598	0.1898	0.4887	-0.2438	0.7798	0.925	-0.0364	0.0084
BP0633	putative exported protein	0.0718	-0.8076	-0.5798	-0.7733	-0.2561	-1.4218	-1.2604	-0.3201	-0.461	-0.2844	-0.0706	0.3645	-0.2323	0.051	0.5291	-0.1512	0.0919	-0.4901	-0.7559	-0.7507	-0.4392	-0.6452	-0.1709	0.0691	-0.2853	-0.4924	-0.5973	-0.3732	0.0625	-0.8949	-0.5155	0.0423	-0.6413	0.0575	0.4729	-0.4286	-0.3324	-0.3372	-0.4635	-0.401	-0.4996	0.4255	-0.3795	-0.6964	0.6912	0.7208	-0.7059	-0.6058
BP0634	probable acyl-CoA dehydrogenase	0.1168	-0.6098	-0.9107	-1.0642	-0.2451	-0.5352	-1.5523	-0.5826	-0.3532	-0.3574	0.1017	0.3589	-0.0234	0.0314	0.6013	-0.1051	-0.0825	-0.9639	-0.5511	-0.6348	-0.7492	-1.1669	-0.1992	-0.0521	-0.531	-0.8413	-0.3483	-0.5591	0.0797	-1.0355	-0.5087	0.0906	-0.724	-0.1143	0.0061	-0.5557	-0.6088	-0.9402	-0.5263	-0.373	-0.7116	0.3931	-0.034	-1.2564	0.8631	0.9072	-0.6377	-0.7634
BP0635	probable enoyl-CoA hydratase	0.4201	-0.7206	-1.1666	-1.0086	-0.2931	-0.7751	-1.4448	-0.3573	-0.5223	-0.2529	-0.0371	0.3266	-0.3214	0.2271	0.4691	0.0033	-0.0846	-0.78	-0.6045	-0.584	-0.5882	-1.0374	-0.3404	0.1413	-0.5412	-0.7709	-0.8214	-0.5579	0.0552	-1.0414	-0.6349	-0.0351	-0.5538	-0.2003	0.2466	-0.2849	-0.494	-0.6456	-0.9684	-0.1475	-0.3876	0.3841	-0.441	-1.0507	0.8042	0.5709	-0.0014	-0.3514
BP0636	conserved hypothetical protein	0.1156	-0.3525	-1.1603	-0.0275	0.0657	0.0058	-0.1858	0.6609	0.9072	0.3491	0.3403	0.6043	-0.2312	0.7225	0.525	0.2047	0.5513	-0.3334	-0.3215	-0.4118	0.0921	-0.1166	0.0847	0.2575	-0.0519	-0.0882	0.3154	0.4098	0.8561	-0.7214	-0.5027	0.3985	0.2134	-0.1997	0.9275	-0.4076	-0.3077	-0.0602	-0.157	0.8942	0.053	0.5654	0.5506	-0.537	0.8947	0.8147	-0.0996	0.0351
BP0637	conserved hypothetical protein	0.4763	0.0126	-0.5317	-0.5065	-0.337	0.1534	-0.8039	-0.1546	-0.1963	-0.5622	0.4121	0.2986	-0.0974	-0.0317	0.5399	0.6079	0.1844	-0.7165	-0.2215	-0.2134	-0.3963	-0.5471	0.056	0.2971	-0.2557	-0.2173	-0.3026	-0.3077	-0.1051	-0.7442	-0.2931	0.2121	-0.2464	0.0905	0.3521	0.0867	-0.1983	-0.4639	-0.179	-0.021	-0.2602	0.3166	-0.4555	-0.4294	0.6752	0.4731	-0.9428	-0.2965
BP0638	hypothetical protein	-0.0129	-0.7833	-0.1415	-0.4888	0.1663	-0.1407	-0.0579	-0.4193	-0.7025	-0.9048	0.3016	0.1186	0.3793	-0.2386	0.1873	0.4194	-0.0163	-0.5129	-0.1473	0.0113	-0.556	-0.4427	0.389	0.3906	-0.2626	-0.2276	-0.1116	-0.1193	-0.6813	-0.5245	0.3065	0.1147	-0.1191	0.2609	0.1456	-0.0179	-0.114	0.106	-0.1047	0.0731	-0.261	-0.0826	-0.8216	-0.0765	0.568	0.3943	-0.5517	0.0322
BP0639	conserved hypothetical protein	0.2472	-1.0279	-1.2984	-0.6052	-0.2051	-0.6511	-1.203	-0.34	-0.566	-0.2479	0.2611	0.4216	-0.2806	0.1112	0.6699	1.0788	0.3526	-0.8572	-0.4806	-0.7749	-0.6109	-1.0889	0.0457	0.2295	-0.6776	-0.8284	-0.9331	-0.432	0.1258	-0.9649	-0.354	0.0575	-0.4909	-0.0224	0.2743	-0.3076	-0.6765	-0.6741	-0.3844	-0.3721	-0.6616	0.4628	-0.5975	-0.792	0.9625	0.6564	-0.3844	-0.5465
BP0640	probable acyl-CoA dehydrogenase	0.1684	-0.1745	0.7372	-0.5341	-0.0826	-0.1408	-0.071	-0.2543	-0.044	-0.4913	0.5565	0.3435	0.078	0.2395	0.1333	0.0115	0.0146	0.0787	-0.6008	0.4157	-0.0206	-0.5737	0.3672	0.2656	0.1401	0.8273	-0.0423	-0.057	0.3055	-0.4819	0.9772	-0.2448	-0.4957	0.2717	0.6249	-0.5775	0.1445	0.189	0.0156	-0.0704	0.2557	0.2964	-0.1675	0.2259	0.2008	0.4927	0.0806	0.0813
BP0641	putative exported protein	0.072	-0.4583	-0.6699	-0.1912	-0.3581	-0.9188	-0.9724	0.0033	-0.1042	-0.6037	0.0082	0.1774	-0.0832	0.0166	0.3106	-0.0698	0.0187	-0.1901	0.046	-0.6645	-0.2391	-0.3959	-0.0913	0.4382	0.0276	-0.1756	0.1689	0.2138	0.345	-0.4962	0.3597	0.1066	-0.1594	-0.1109	0.2519	0.1822	-0.4902	-0.4624	-0.0589	0.3734	0.0279	0.2993	0.2144	-0.3704	0.7785	0.4218	-0.3618	0.0639
BP0642	conserved hypothetical protein	0.1491	-0.4475	-0.8509	-0.9543	0.3196	-0.7032	-0.9959	-0.3465	-0.4253	-0.7209	0.337	0.713	-0.2473	0.097	0.5869	-0.0603	0.1524	-0.6322	-0.6613	-0.6937	-0.4456	-0.0131	-0.1499	0.0744	-0.0967	-0.1448	-0.3123	-0.4982	0.0611	-1.1064	-0.4709	-0.218	-0.8579	-0.3753	0.3575	-0.2273	-0.2168	-0.6088	-0.4724	-0.1759	-0.6802	0.2447	-0.5407	-0.6795	0.8903	1.2371	-0.4829	-0.7325
BP0643	LysR-family transcriptional regulator	0.2006	-0.137	-0.0531	-0.0785	-0.008	-0.2397	-0.3804	0.1419	-0.0046	-0.4538	0.1469	0.1389	-0.0102	0.2286	0.1745	0.2419	-0.0591	0.0179	0.0363	-0.287	0.1527	-0.2599	-0.2241	0.2076	-0.1032	-0.1033	0.0353	0.0384	-0.0939	-0.3356	-0.0069	1.0228	0.1828	-0.1167	0.2228	0.1247	-0.0601	-0.0585	-0.0413	0.1695	-0.1536	0.2366	0.0141	0.1728	1.0431	0.9023	-0.469	0.2106
BP0644	putative dihydrodipicolinate synthase	0.2508	0.1414	0.7353	0.0106	0.0212	-0.3813	-0.1288	-0.0643	0.1194	-0.6585	0.0397	0.3102	0.1805	0.1671	0.0842	0.2649	0.2184	-0.0576	-0.1008	-0.0462	0.0373	-0.3029	0.2903	0.5399	0.2135	0.2391	0.1802	0.2418	0.0268	-0.096	0.5	0.4355	-0.0307	0.0124	0.4199	-0.0402	0.193	0.4921	-0.0095	0.4427	-0.0714	0.3946	0.4526	0.3276	0.5757	0.6991	-0.0077	0.3741
BP0647	conserved hypothetical protein	0.1102	-0.1721	-0.4922	-0.5052	0.0852	-0.4109	-0.3677	-0.5726	-0.4199	-0.3297	0.2688	0.3282	-0.0777	-0.001	0.4317	0.5695	0.0091	-0.3621	-0.3376	-0.1143	-0.1388	-0.5493	0.1362	0.0653	-0.0388	0.1107	-0.5652	-0.5607	0.1408	-0.7772	-0.2872	0.1777	-0.0089	0.0801	-0.049	-0.0924	-0.358	-0.289	-0.9354	0.1954	-0.4425	0.3757	-0.3476	-0.4055	0.6215	0.4739	-0.619	-0.5674
BP0648	conserved hypothetical protein (Pseudogene)	0.143	-0.7632	-0.9901	-0.8506	-0.3924	-0.7878	-1.3674	-0.5479	-0.8287	-0.3686	0.2921	0.7952	-0.3271	0.1939	1.2242	0.8381	0.6518	-0.5961	-0.7604	-0.0338	-0.4902	-1.0651	-0.3941	0.1397	-0.4402	-0.6468	-1.1013	-0.3765	0.6278	-1.076	-0.8986	-0.0207	-0.5317	0.4737	0.7533	-0.3868	-0.6354	-0.8953	-0.4642	-1.3214	-0.7854	0.6637	-0.1992	-0.8156	0.958	0.8069	-1.0355	-0.5636
BP0649	putative exported protein	0.1467	-0.1915	0.4733	-0.8168	-0.2208	-0.3389	-0.1989	-0.7501	-0.7055	-1.0555	0.5711	0.0017	0.4129	-0.0863	0.1155	0.1327	-0.2624	-0.2092	-0.4611	0.1888	-0.2819	-0.2389	0.3006	0.1052	0.039	0.2783	0.0537	-0.2583	-0.492	-0.3689	0.4326	-0.2558	-0.318	0.1799	0.307	-0.3926	0.0707	0.1644	0.0246	-0.3052	-0.0442	0.1986	-0.4094	0.0537	0.2226	0.7287	-0.3696	-0.1518
BP0650	LysR-family transcriptional regulator	0.0191	0.1129	0.1045	0.0709	0.0451	0.0467	-0.2262	0.2911	-0.024	-0.1593	0.1983	0.1798	-0.0203	0.2083	0.0994	0.2122	0.2281	0.2339	0.0641	-0.0011	0.0391	0.1572	0.1666	0.51	0.0788	0.0726	0.0712	0.3356	-0.1964	-0.082	-0.0211	0.4461	0.2455	0.1922	0.2598	-0.0681	0.2899	0.2447	0.1496	0.4394	0.471	0.1477	0.278	0.3476	0.5226	0.5007	-0.1234	0.4064
BP0651	D-lactate dehydrogenase	0.2316	0.1439	-0.0852	-0.0299	-0.2511	-0.4699	-0.7961	-0.2516	-0.2711	-0.0559	0.1411	0.2525	0.0744	0.127	0.0249	-0.06	0.1735	-0.1202	-0.0818	-0.0318	-0.0869	-0.0049	0.055	0.2954	0.0505	-0.0194	0.1375	0.3204	0.0404	-0.0209	0.2445	0.0377	-0.0668	0.0958	0.1052	-0.2588	0.1873	0.278	-0.2393	0.2624	0.1617	0.1864	-0.0079	0.0559	0.4317	0.5098	0.0579	0.1397
BP0652	probable acyl-CoA dehydrogenase	-0.0354	0.1206	0.1903	-0.2042	-0.0438	0.0419	-0.5169	0.1176	0.1651	-0.3785	-0.0143	0.102	0.0128	0.1898	-0.2357	-0.3632	0.0066	0.1824	-0.2443	-0.2945	0.2875	-0.1182	-0.1069	0.1739	0.2147	-0.064	0.1653	0.2063	0.1117	0.0462	-0.1607	0.5346	0.1393	-0.111	0.0645	-0.2599	0.0707	0.3746	0.0112	0.0277	0.0716	0.2195	0.2656	0.3052	0.4828	0.6801	-0.0278	0.2759
BP0653	probable acyl-CoA dehydrogenase	-0.4897	-0.0344	-0.2615	-0.548	-0.4462	-0.5364	-0.2668	-0.2197	0.0823	0.2338	-0.1287	0.0935	-0.1241	0.03	-0.1576	0.1303	-0.3053	0.1528	-0.7188	-0.7596	-0.0642	-0.1268	-0.5983	-0.0878	-0.1571	-0.4524	0.1345	0.0904	-0.0318	-0.3545	-0.3514	0.885	-0.1175	-0.4257	0.3798	-0.1356	-0.141	-0.0552	-0.172	0.0031	0.1025	0.1159	0.1761	0.3431	0.6817	0.9227	-0.3068	0.2712
BP0654	putative exported protein	-0.1076	-0.2711	-0.6254	-0.4421	-0.1397	-0.4723	-0.5338	-0.0639	-0.2638	-0.178	-0.132	0.0594	-0.0398	0.0565	0.2265	0.213	0.2887	-0.3629	-0.4552	-0.2185	-0.0417	-0.2778	0.1956	0.0875	-0.0374	0.0044	-0.2573	-0.2038	0.0832	-0.172	0.0813	0.3261	0.2331	-0.0586	0.0718	-0.1686	-0.3351	-0.038	-0.4828	-0.164	-0.2116	0.2971	-0.1948	-0.1263	0.5033	0.2942	-0.2373	0.0023
BP0655	putative acetylornithine deacetylase	0.557	0.0664	0.3727	-0.2709	0.1693	-0.3511	-0.2384	-0.7561	-0.7966	-0.2302	0.2529	0.651	0.2977	0.0653	0.3883	0.1038	0.1466	0.0175	-0.1499	-0.2142	-0.0336	-0.248	-0.0444	0.1834	0.0128	-0.4445	0.0312	-0.0931	0.1469	-0.0593	-0.1291	0.4518	0.0723	0.3467	0.3333	-0.0786	-0.1101	-0.0065	-0.1117	-0.2739	-0.3519	0.3666	-0.2795	-0.0629	0.7823	0.6677	-0.0724	-0.0872
BP0656	conserved hypothetical protein	-0.0288	-0.0385	-0.0966	-0.0811	0.3502	-0.2107	0.6402	0.408	-0.1644	-0.1322	0.4425	0.2026	-0.0733	0.1935	0.4279	0.7691	0.2068	-0.0663	-0.2821	-0.1018	0.0185	-0.2118	0.1406	0.1255	-0.1209	-0.0366	0.0357	0.2404	0.4525	0.157	0.1162	0.7383	0.4835	0.1361	0.2979	0.4407	-0.0565	0.2761	-0.2611	0.1115	-0.0503	0.2859	0.1967	0.1606	0.6088	0.6623	-0.1832	0.047
BP0657	putative endoribonuclease	0.3279	0.2036	0.7769	-0.1298	0.3486	0.2632	0.4172	-0.1912	-0.5782	-0.6756	0.8406	0.2325	0.4544	-0.1197	0.3728	-0.0088	0.1064	-0.0392	-0.0264	0.5236	-0.5089	0.1596	0.6799	0.4141	0.0258	-0.1522	0.2978	-0.1204	-0.6972	-0.2029	0.5016	0.2604	-0.1226	0.5373	0.1018	-0.0118	0.5023	0.5782	0.3748	0.07	0.2827	-0.1257	-0.5274	0.3147	0.4362	0.7924	-0.3735	0.1965
BP0658	conserved hypothetical protein	-0.0514	-0.2304	-0.2963	-0.4636	-0.3048	-0.2716	-1.016	-0.2985	-0.1987	-0.9326	0.2581	0.3115	-0.0458	0.1975	0.3022	-0.6397	0.0688	-0.1006	-0.2223	-0.3885	-0.205	-0.5498	-0.1759	0.1277	-0.0592	-0.1827	-0.5465	0.0465	0.0658	-0.5727	-0.395	0.447	0.105	-0.2399	0.3786	0.0561	-0.4271	-0.4635	0.0277	-0.0475	-0.3097	0.3135	0.0705	-0.2184	0.5672	0.7142	-0.1377	-0.2353
BP0659	probable zinc-binding dehydrogenase	-0.0382	-0.1056	-0.5474	-0.2639	-0.0275	-0.304	-0.7073	-0.3731	-0.6937	-0.3994	0.1147	-0.1295	-0.3048	-0.0775	-0.1004	0.4945	-0.3979	-0.7419	-0.7323	-0.7784	-0.3682	-0.5747	-0.5729	-0.245	-0.4794	-0.7227	-0.7298	-0.3468	0.1464	-0.1352	-0.1337	0.8753	-0.1136	-0.6846	-0.0679	-0.3774	-0.1852	-0.231	-0.438	-0.5007	-0.3477	0.1361	-0.4828	0.2075	0.9172	0.7115	-0.6599	-0.0822
BP0660	LysR-family transcriptional regulator	0.1463	0.2221	0.1577	-0.014	-0.0023	0.1036	-0.0153	0.1806	0.0472	-0.2204	0.2541	0.2333	0.2405	-0.0669	-0.008	-0.1386	0.0045	-0.0874	-0.0867	0.0934	0.0157	0.1051	0.4485	0.3937	-0.1986	0.0449	0.0635	0.1762	0.0278	0.1789	0.1216	0.2205	0.2243	0.2237	0.3108	-0.0752	0.1107	0.0485	-0.0898	0.2347	0.068	-0.0206	-0.0181	0.3759	0.2572	0.2389	-0.0782	0.1711
BP0661	putative acetyl-CoA synthetase	-0.1949	-0.0713	0.0161	-0.0076	0.0001	1.2702	-0.2124	-0.1347	-0.1716	-0.0983	-0.0017	-0.0704	-0.0373	0.258	-0.0831	-0.1568	-0.2547	-0.208	-0.366	-0.27	-0.0417	-0.0698	-0.2326	0.1002	-0.1584	-0.3651	-0.0345	0.0893	0.0647	-0.1462	0.0866	0.6133	-0.1336	-0.1274	-0.0776	-0.3246	-0.1443	0.0041	0.017	-0.0777	-0.1039	-0.1003	-0.0342	0.0291	0.5085	0.644	0.0708	0.0142
BP0662	probable enoyl-CoA hydratase	-0.2323	-0.3932	-0.4519	-0.3371	-0.385	-0.5557	-0.3926	-0.4189	-0.6092	-0.5215	0.0674	0.085	-0.2881	-0.2248	0.0263	-0.369	-0.0173	-0.5119	-0.6321	-0.4711	-0.4029	-0.4508	-0.1346	0.1002	-0.321	-0.4998	-0.6622	-0.2149	-0.0339	-0.225	-0.2144	1.2195	-0.3643	-0.1787	-0.0028	-0.4643	-0.4412	-0.4169	-0.5398	-0.205	-0.4741	-0.0676	-0.47	-0.0298	0.9882	1.0023	-0.7623	-0.272
BP0663	conserved hypothetical protein	-0.0497	-0.5638	-0.9839	-0.0827	-0.3425	0.1918	0.2236	0.9267	0.5608	-0.3627	-0.2277	-0.0084	-0.4201	0.1925	-0.0389	-0.6591	0.046	-0.3775	-0.1437	-0.3593	0.508	-0.0013	-0.1097	0.1732	-0.1309	-0.119	-0.3512	0.0007	0.3354	0.104	0.0711	0.8859	0.0286	-0.2869	-0.0683	0.055	-0.0994	-0.1731	-0.4027	0.1888	0.2134	0.1402	0.2161	0.0628	0.5297	0.1752	-0.4196	0.2673
BP0664	putative exported protein	-0.2729	-0.5104	-0.4044	-0.2573	-0.3706	0.4399	0.3103	0.4929	0.1794	-0.4767	-0.2071	-0.1108	-0.0308	-0.0652	-0.1526	-0.1527	-0.2411	-0.438	-0.3829	-0.841	0.244	0.1096	-0.2171	-0.0093	-0.2879	-0.2931	-0.2257	-0.321	0.1661	0.0769	0.0462	0.4703	-0.0133	-0.6472	-0.0509	-0.0874	-0.1032	-0.0008	-0.3875	-0.0639	0.2691	-0.0302	0.2521	0.1566	0.3162	0.3586	-0.281	-0.0442
BP0665	thymidine diphosphoglucose 4,6-dehydratase	-0.0976	-0.267	-0.0435	-0.4415	-0.4123	0.1709	0.0506	0.1032	0.4042	-0.2135	0.0125	0.0526	-0.1776	0.0181	-0.046	-0.3119	-0.375	-0.1516	-0.327	-0.4023	0.3414	-0.0337	-0.2136	-0.2251	-0.2511	-0.3212	-0.2325	-0.3641	0.285	0.1075	0.3242	0.3026	-0.0775	-0.232	0.0184	-0.1877	-0.0873	-0.0216	-0.4426	-0.2975	-0.0294	0.0141	0.1376	0.0392	0.3225	0.4342	-0.3071	-0.1712
BP0666	glucosamine--fructose-6-phosphate aminotransferase [isomerizing]	-0.1107	-0.3194	-0.5896	0.2368	-0.1275	-0.2201	-0.5031	0.7174	0.1496	-0.7334	-0.2562	-0.156	-0.1666	0.2167	0.0803	-0.0605	0.4966	0.0483	-0.002	-0.4403	0.0382	0.2569	0.5609	0.6437	0.149	0.1189	0.1657	0.5571	-0.2601	-0.3956	-0.1314	0.7126	0.2769	-0.1677	0.1914	0.1374	-0.069	0.2937	0.1012	0.726	0.4461	0.2184	0.4139	0.1874	0.7941	0.4652	-0.0448	0.7063
BP0667	AsnC-family transcriptional regulator	0.123	0.2141	0.2795	-0.1245	-0.0795	-0.2873	-0.4872	-0.1746	-0.2641	-0.2876	0.1182	0.2034	-0.0103	0.2076	0.0821	0.1579	0.0614	-0.1546	-0.0279	-0.4945	-0.0771	-0.0881	-0.2885	0.2044	-0.0169	-0.0913	-0.1846	-0.1094	0.1331	-0.2324	-0.1593	1.1951	-0.0076	-0.0943	0.1978	-0.1396	-0.04	-0.079	-0.0449	0.0114	-0.0495	0.3181	0.1529	0.1458	1.1622	1.378	-0.2566	0.0169
BP0668	probable thiolase	0.0583	-0.033	-0.2119	-0.55	0.0625	0.0463	-0.0641	-0.5291	-0.38	-0.2105	0.4025	0.1477	-0.0047	0.2112	0.4128	-0.2251	-0.2916	-0.1774	-0.3912	-0.1245	-0.295	-0.6472	-0.1719	-0.0928	-0.2358	-0.689	-0.2727	-0.6956	0.1598	-0.1328	-0.0317	0.3006	0.2139	0.3617	0.3005	-0.1192	-0.1252	-0.0981	-0.3313	-0.3178	-0.422	0.346	-0.2131	-0.1747	0.8052	0.8745	-0.2384	-0.3702
BP0669	probable enoyl-CoA hydratase/3-hydroxyacyl-CoA dehydrogenase, bifunctional enzyme	-0.2639	-0.2333	-0.0713	-0.5039	-0.4371	-0.2919	-0.844	-0.1635	0.2395	-0.5627	0.0139	0.3228	0.0718	0.041	0.1611	0.2173	-0.3148	-0.1165	-0.3359	-0.6898	-0.2693	-0.3144	0.0036	-0.1356	-0.0394	-0.1304	-0.0335	-0.0852	0.4127	-0.3452	0.2588	0.186	-0.1451	0.0414	0.3974	0.2191	-0.2125	-0.2002	0.0047	0.03	-0.8586	0.0318	0.088	-0.2639	0.4182	0.4668	-0.58	0.2637
BP0670	probable acyl-CoA dehydrogenase	0.6677	-0.2113	0.1554	-0.6564	-0.0593	-0.0003	-0.1084	0.1655	-0.0829	-0.1591	0.0772	0.2604	-0.209	0.0037	0.4941	0.0758	0.2826	0.3864	-0.1713	-0.1922	-0.2842	-0.3058	-0.0563	0.1842	-0.1362	-0.2099	0.0902	-0.0087	0.129	-0.3229	-0.0689	0.6133	0.1844	0.1142	0.1828	0.0454	-0.2719	-0.1799	-0.0036	-0.244	-0.1113	0.3984	0.1306	-0.007	0.6152	0.7242	0.3726	-0.2412
BP0671	putative exported protein	-0.0229	-0.9302	-0.764	-0.7531	-0.0892	-0.8761	-1.2655	-0.6223	-0.5589	-0.5017	-0.0456	0.1424	-0.1417	-0.0601	0.4325	-0.2525	0.0471	-0.7872	-0.5189	-0.509	-0.3509	0.0935	-0.2053	-0.198	-0.3965	-0.5087	-0.8075	-0.497	0.1895	-0.5586	-0.4296	0.1559	-0.4173	0.0926	0.5594	-0.0659	-0.2628	-0.5773	-0.8261	-0.5626	-0.4245	0.3523	-0.4382	-0.6225	0.7333	0.6796	-0.1965	-0.4654
BP0672	acetyl-CoA synthetase	0.1441	-0.4438	-1.349	-0.321	-0.5037	-0.342	-0.7436	-0.8028	-0.0298	-0.2115	-0.0365	0.7125	0.2174	0.4021	0.3979	0.4576	-0.0122	-0.0954	-0.5678	-0.2726	-0.0705	-0.5283	-0.6639	0.2896	-0.1939	-0.1909	-0.203	-0.2389	0.3885	-0.6618	-0.2144	0.5658	0.3618	-0.0046	-0.121	-0.4894	-0.2812	-0.3728	-0.453	-0.2623	-0.6226	0.5312	0.0597	-0.5796	0.9352	-0.2676	0.2712	-0.3112
BP0673	conserved hypothetical protein	-0.3871	-0.301	0.5313	-0.3155	0.3472	0.263	0.3325	-0.3082	0.0248	-0.3901	0.3313	-0.0014	0.2217	-0.0078	0.1934	-0.0038	-0.1133	0.0673	0.2112	0.0428	-0.439	0.1036	0.4057	0.3125	-0.0058	-0.1464	0.3178	-0.059	-0.4575	-0.3584	0.3936	-0.055	0.0478	0.2487	0.3397	0.0157	0.2076	0.2514	0.2529	0.3028	0.4839	0.1484	-0.3265	0.2278	0.5358	0.9087	-0.1272	-0.0784
BP0674	probable transcriptional regulator	-0.0144	-0.3373	-0.2772	-0.1103	-0.032	-0.0726	-0.4409	-0.0043	-0.1208	-0.5773	0.2357	0.0768	-0.1671	-0.017	0.058	0.574	0.0316	-0.0807	-0.2117	0.0712	-0.3011	0.0378	0.0336	0.2128	-0.1593	-0.6427	-0.2803	0.1216	-0.0317	-0.2352	-0.2498	0.747	0.0837	-0.0132	0.0843	-0.225	-0.5374	0.0291	-0.0947	-0.0219	-0.1792	0.0819	-0.0214	-0.0406	0.9939	0.9548	-0.4591	0.0528
BP0675	probable molybdopterin oxidoreductase	0.052	-0.1446	-0.0938	-0.0504	-0.0603	-0.3786	-0.3872	-0.0155	-0.0124	-0.1786	0.2883	0.2198	0.2217	0.1994	0.2927	0.1692	0.1051	-0.0041	-0.0748	-0.1722	0.0395	-0.3269	-0.1119	0.3371	-0.0355	0.0316	0.4681	-0.1448	-0.1186	-0.1358	0.4772	0.4813	0.0346	0.4472	0.2571	0.1935	-0.468	0.4449	-0.2007	0.0851	0.1241	0.1963	0.1556	0.3176	0.5607	0.9235	0.045	0.2869
BP0677	glutamyl-tRNA reductase	0.1632	-0.1094	-0.0027	0.2232	0.3964	-0.3616	-0.6612	0.1256	-0.0913	0.0411	0.1656	0.3434	-0.0457	0.1586	-0.0476	0.9195	0.2361	0.1634	0.0052	-0.0038	0.0642	0.2582	0.6031	0.317	0.2217	0.2469	0.0107	0.3094	0.1877	0.0743	0.2663	0.562	0.3211	0.2509	0.3903	0.0697	0.282	0.1846	-0.0955	0.334	0.3262	0.1246	0.2755	0.383	0.5316	0.6556	0.302	0.3484
BP0678	peptide chain release factor 1	0.2574	0.3716	1.0662	-1.1688	0.4271	-0.2297	0.3459	-1.171	-0.4736	-0.3925	0.6405	0.2573	0.4813	-0.61	0.1037	0.5729	-0.8781	0.0327	-0.1801	0.5085	-0.6819	-0.2311	0.2929	-0.3467	0.0497	0.245	0.1672	-0.605	-1.0474	-0.1505	0.7117	-0.2414	0.0542	0.6145	0.5626	-0.0429	0.0897	0.2483	0.2945	-0.49	-0.0277	-0.2183	-0.3461	0.3016	0.2728	1.1793	0.4117	-0.3071
BP0679	heme biosynthesis protein	0.0968	-0.1138	0.2208	0.042	0.2661	-0.3077	-0.19	0.1576	0.1321	-0.2472	0.5049	0.3114	0.1506	0.2216	0.2521	-0.2371	0.2427	-0.0515	0.1482	0.1962	0.0147	-0.2139	-0.0584	0.4535	0.1251	0.3535	0.3291	0.381	0.1346	-0.2456	0.2697	0.3862	0.0609	0.2711	0.2736	0.0683	0.0051	0.0431	0.1443	0.3433	0.0476	0.2285	0.0709	-0.0644	0.472	0.4862	-0.0144	0.4381
BP0680	conserved hypothetical protein	-0.1031	0.0089	0.1822	0.0236	-0.126	-0.3584	-0.3475	-0.0952	-0.365	-0.3772	-0.0407	-0.0966	0.3845	-0.0701	-0.2022	0.2633	-0.131	-0.0637	-0.3437	-0.4356	-0.2081	-0.4948	-0.5816	0.1826	-0.3566	-0.5205	-0.0512	0.1426	-0.1619	-0.241	-0.1889	0.749	-0.1594	-0.2211	-0.0319	-0.2872	-0.2032	-0.183	-0.1611	0.0103	-0.395	-0.0496	-0.2004	-0.0744	1.0236	1.0953	-0.562	0.2996
BP0681	probable flavoprotein	0.0858	0.1334	-0.4288	0.2806	0.1156	-0.1327	-0.2981	0.4587	0.0368	-0.3706	0.2406	0.2444	0.2673	0.0237	0.2148	0.268	0.5036	-0.1786	0.1373	0.1694	-0.0661	-0.0311	0.568	0.6598	-0.107	-0.039	0.1883	0.6442	-0.107	-0.1501	0.1901	0.5608	0.2857	0.0868	0.1214	0.0992	-0.0103	-0.0476	-0.0177	0.5583	0.1959	0.1832	0.1153	0.1632	0.655	0.2923	0.0234	0.4846
BP0682	putative exported protein	0.1178	0.0306	-0.1324	-0.5849	0.0652	0.1149	0.6335	0.3368	-0.0131	-0.5138	0.2607	0.1258	0.1873	-0.0086	0.1451	-0.0218	0.0887	-0.1453	-0.2026	-0.0846	-0.3754	-0.0038	0.2279	0.2032	-0.0481	-0.0493	0.027	-0.1599	-0.2515	-0.2964	-0.073	0.1986	0.134	0.1441	0.3432	0.1009	-0.1349	0.3319	0.1973	0.0233	0.439	0.1663	0.0131	0.0135	0.6036	0.5647	0.0193	0.0658
BP0683	4,5-dihydroxyphthalate decarboxylase	-0.3438	0.117	-0.7156	-0.0326	-0.3093	0.3848	0.5312	1.3251	0.9794	-0.3423	-0.1015	-0.0445	0.2191	0.0622	0.0329	0.5978	0.4957	-0.0814	0.151	0.0134	-0.1333	0.1284	0.6223	0.7648	-0.0401	0.0694	0.2324	0.7311	-0.46	-0.0619	-0.0438	0.2556	0.5112	0.2894	0.3839	0.4147	-0.0319	0.4594	0.2813	1.0247	0.7908	0.1661	0.5943	0.2419	0.2592	0.1391	0.4948	0.7658
BP0684	molybdopterin dehydrogenase (Pseudogene)	0.2667	-0.3227	0.15	-0.3318	-0.0048	0.0473	0.1922	0.4608	0.7827	-0.2956	0.0898	-0.0084	0.0795	0.1998	0.0662	0.505	0.0513	0.1693	-0.1207	0.11	0.1108	0.1319	0.4635	0.3848	0.1494	0.216	0.2554	0.1042	-0.2542	-0.3172	0.1578	0.2376	0.3073	0.5461	0.3766	0.1965	0.2066	0.2769	0.2795	0.501	0.4854	0.1916	0.759	0.2731	0.3115	0.6203	0.165	0.2545
BP0684A	probable 2Fe-2S ferredoxin	-0.0956	-0.1015	0.2575	-0.7803	-0.0626	0.0771	0.1051	0.2083	0.4914	-0.3518	0.1391	0.0838	0.2148	-0.0437	0.1609	0.2425	0.1295	0.1873	-0.1188	0.2783	-0.2153	0.2159	0.6564	0.309	0.0281	0.1688	0.3668	0.1532	-0.059	-0.2697	0.2334	0.9496	0.1447	0.4995	0.4167	0.0555	0.0748	0.4744	0.3252	0.3809	0.3753	0.163	0.3663	0.6365	0.9619	0.8236	0.1907	0.0667
BP0685	probable dehydrogenase/oxidase	0.141	-0.1903	-0.1657	-0.4307	-0.1696	-0.2847	-0.1768	0.0989	0.4145	-0.4839	0.2329	0.3148	0.195	0.1742	0.286	0.6613	0.2286	0.0841	-0.1211	-0.113	-0.0539	-0.1028	0.1261	0.245	-0.0155	-0.0945	0.0701	-0.0631	0.1013	-0.3975	0.2228	0.4424	0.0499	0.2121	0.3112	-0.0125	0.0379	0.2033	-0.062	0.0413	0.3934	0.591	0.3505	-0.0215	0.7526	0.3635	0.3027	0.0108
BP0686	conserved hypothetical protein (Pseudogene)	0.3489	-0.0798	0.5398	-0.6877	0.0531	0.2052	0.2204	0.0395	0.4508	-0.1992	0.3221	0.2524	0.1118	0.2517	0.2623	-0.6743	-0.074	0.1965	-0.1197	0.1558	-0.041	-0.0347	0.1346	0.1641	0.1116	0.1997	0.1771	-0.2475	-0.0432	-0.1295	0.4257	0.5028	0.11	0.492	0.5614	-0.1109	0.1719	0.1924	0.2285	0.0057	0.0855	0.2647	0.3018	0.1633	0.8046	1.2531	0.2687	0.1057
BP0689	putative lipoprotein	0.1028	-0.0707	-0.2223	0.0139	-0.1755	-0.8365	-0.5119	-0.1448	-0.5145	-0.2807	0.0671	-0.0975	0.1462	0.0114	-0.0904	-0.6522	0.0989	-0.0542	-0.1314	-1.3856	-0.086	-0.3283	-0.0073	0.1987	-0.2065	-0.1349	0.1088	0.1811	-0.0199	-0.2558	0.1089	0.5365	-0.0608	-0.8313	-0.0153	-0.0146	-0.1401	-0.1694	-0.2786	0.1788	-0.2878	0.0635	-0.1075	0.2625	0.4755	0.2551	0.0032	0.2635
BP0690	conserved hypothetical protein	-0.0685	-0.0541	-0.4861	0.1962	-0.1351	-0.4051	-0.8646	0.2796	-0.12	-0.8809	-0.1377	0.2241	0.0013	0.1868	0.0705	-0.0318	0.3916	-0.1677	-0.0663	-1.0168	-0.1833	-0.3979	0.1188	0.5587	-0.0788	-0.147	0.2867	0.3915	0.0573	-0.22	-0.1011	0.7394	-0.0204	-0.6919	0.1379	0.0549	-0.4118	-0.2545	-0.2256	0.4941	-0.2598	0.2444	0.0682	0.1456	0.5313	0.1834	-0.5471	0.4129
BP0691	probable cytochrome C (pseudogene)	0.1827	-0.04	-0.3703	0.2412	0.0856	-0.3003	-0.4211	0.1447	-0.0782	-0.2538	0.0294	0.2111	0.0837	0.1368	0.1684	0.2556	0.3204	-0.1783	-0.0738	-0.1268	0.0309	0.1385	0.3049	0.5201	-0.088	-0.0062	-0.0031	0.1702	0.1586	-0.2736	0.2683	0.1921	0.2454	-0.114	0.1001	0.1016	-0.0404	0.0421	-0.127	0.4028	0.1598	0.3405	0.1561	0.0395	0.3389	0.0084	-0.0737	0.2984
BP0692	cytochrome C	0.274	0.0203	-0.0552	-0.339	-0.1288	-0.5165	-0.6206	-0.2483	-0.1922	-0.4181	0.484	0.19	0.2534	0.2075	0.1668	-0.315	0.0404	-0.0582	-0.1421	-0.307	-0.0704	-0.2859	0.2037	0.3946	0.0869	0.0052	0.0816	-0.0322	0.1027	-0.2086	0.6402	0.3923	-0.1196	-0.1405	0.2448	-0.0804	-0.0602	0.0229	0.0115	-0.0861	0.0241	0.315	0.0253	0.0183	0.6163	0.6539	0.0268	0.0344
BP0693	Hpr serine kinase/phosphatase	0.2424	0.2874	0.139	0.3535	0.0554	-0.1609	-0.0889	0.3366	-0.0435	-0.3788	0.2619	0.1458	0.2759	0.3033	0.1632	-0.1977	0.3288	0.1112	0.0275	-0.4801	0.0565	0.0813	0.2039	0.7489	0.078	0.0154	0.3836	0.4566	0.2768	-0.1401	0.2235	0.266	0.0914	-0.274	0.2613	-0.0851	0.1467	0.1093	0.0933	0.4995	0.0947	0.4336	0.129	0.3444	0.4137	0.3197	-0.0454	0.6297
BP0694	nitrogen regulatory IIA protein	0.2642	0.0874	0.0498	0.018	0.0373	-0.0276	-0.1824	-0.028	-0.096	-0.1052	-0.0262	0.1269	0.0036	0.2921	0.0744	-0.5066	-0.1761	0.1947	0.0722	-0.4912	0.0287	-0.0612	-0.1012	0.1515	-0.0519	-0.1383	-0.0551	-0.0972	0.3753	0.0281	0.3133	0.2714	-0.0057	-0.2667	0.2421	-0.007	0.098	0.1237	-0.0739	-0.0499	0.025	0.2483	0.146	0.1515	0.3077	0.2474	0.1502	-0.0584
BP0696	probable sigma(54) modulation protein (Pseudogene)	-1.2601	-1.4622	-1.4955	-1.5187	-1.2565	-1.5896	-1.4792	-0.5605	-0.865	-1.3692	-0.9305	-0.9279	-0.2092	-1.0989	-0.6824	-0.1714	-0.6344	-1.3425	-1.4962	-1.4134	-1.5219	-1.5355	-0.56	-0.0687	-1.5713	-1.4613	-0.4185	-0.4438	-1.1576	-0.6966	-0.2788	1.6661	-1.2127	-1.1254	-1.2604	-1.166	-1.2078	-1.1992	-1.3127	-1.1869	-1.1902	-1.0552	-1.3643	1.0721	1.6612	1.8312	-1.363	-1.0222
BP0697	ABC transporter	0.1519	-0.0994	-0.5361	0.0982	0.0257	-0.72	-0.718	0.0731	-0.2602	-0.3108	0.0553	0.0872	0.1797	0.1498	0.1006	-0.3315	0.1845	-0.0102	0.0499	-0.713	-0.1867	-0.2464	0.2402	0.4818	-0.1369	-0.1187	0.2054	0.2635	0.0564	-0.1951	0.1741	0.3044	0.0424	-0.4206	0.109	-0.0616	0.1347	0.1779	-0.1367	0.4087	-0.0313	0.2303	-0.0336	0.1167	0.5967	0.1596	0.07	0.2252
BP0698	putative exported protein	-0.0623	-0.1797	-0.211	-0.0432	-0.03	-0.6862	-0.5123	-0.0427	-0.1764	-0.0521	0.0245	0.0869	0.1302	0.167	-0.0657	-0.8328	0.1358	0.0776	0.0827	-0.7794	-0.2772	-0.2507	-0.0506	0.3389	0.003	-0.1606	0.1816	0.1953	-0.0351	-0.2365	0.0394	0.3671	0.2439	-0.5883	0.2191	-0.0304	0.0794	0.2004	-0.0214	0.2537	-0.0366	0.1615	-0.1029	0.1662	0.352	0.2399	0.0656	0.3186
BP0699	putative exported protein	-0.0941	-0.0763	-0.8165	0.4478	-0.1707	-0.645	-0.6626	0.4997	-0.2379	-0.9104	-0.1561	0.0267	0.0764	0.1836	-0.1509	0.1096	0.5428	-0.1095	-0.1646	-1.0683	-0.0527	-0.0307	0.3983	0.9777	0.1107	-0.0297	0.4448	0.9052	-0.1206	-0.3096	0.2409	0.0164	-0.0368	-1.0639	-0.1203	-0.1973	-0.0779	-0.1474	-0.1312	0.59	0.11	0.2165	0.1215	-0.0335	0.2477	-0.2614	-0.2311	0.747
BP0700	probable hydrolase	-0.038	-0.0048	-0.0861	0.0428	-0.2718	-0.411	-0.5289	-0.1405	-0.1723	-0.5994	-0.0724	0.086	-0.1864	0.0904	-0.1967	0.2248	-0.0293	-0.0901	-0.2806	-0.348	-0.0549	-0.0573	0.2457	0.1073	0.108	0.1224	-0.1884	0.2381	-0.3679	0.0125	-0.0304	0.1267	-0.0369	0.0682	0.2186	-0.0108	-0.0043	0.134	-0.1439	0.1576	0.011	0.0982	0.0634	0.1548	0.136	0.1	-0.3453	0.2384
BP0701	conserved hypothetical protein	0.2704	-0.1174	0.3928	-0.0828	0.1204	-0.3753	-0.3364	-0.0013	0.0942	-0.1959	0.0726	0.3661	0.2037	0.3333	0.2069	-0.043	0.0744	0.4098	0.0377	-0.2424	0.0187	-0.2055	-0.1169	0.3618	0.1566	0.3116	0.4408	0.1399	0.4168	-0.0902	0.2004	0.1427	0.178	0.0565	0.4723	-0.0852	0.2139	0.1759	0.1741	0.2186	-0.2261	0.3989	0.224	0.005	0.2223	0.1425	0.0052	0.2102
BP0702	phosphoribosylglycinamide formyltransferase 2	0.2125	-0.057	0.3422	-0.1633	0.0592	-0.049	-0.2731	0.0869	0.0791	-0.0594	0.1412	0.2107	0.2191	0.2887	0.1494	0.4923	-0.1384	0.2365	0.0765	-0.102	0.0759	-0.1603	-0.2578	0.3761	0.0911	0.0189	0.079	-0.0359	-0.0758	-0.2425	-0.0116	0.2754	0.374	0.2456	0.4051	0.2843	0.2276	0.4309	0.0016	0.1176	0.1665	0.3188	0.278	0.1465	0.6129	0.5496	0.2391	0.1858
BP0703	N-terminal region of TonB dependent receptor protein (Pseudogene)	-0.305	0.1682	-0.2181	0.2283	-0.2314	0.3231	0.5709	1.2	1.1633	-0.6598	-0.1275	-0.1584	-0.0125	0.29	0.3412	0.2781	0.812	-0.0071	0.2771	0.1057	0.3028	0.1636	0.3923	1.1007	0.1821	0.3329	0.5139	0.9004	-0.6054	-0.8523	-0.7203	0.5717	0.3162	0.0475	0.5379	0.2861	0.3248	0.4919	0.54	0.7827	0.4401	0.394	0.6439	0.6103	0.5934	0.4192	0.2188	0.7303
BP0705	putative C-terminal region of dehydrogenase (Pseudogene)	0.2356	-0.7144	-0.8605	-0.3727	-0.1202	-0.391	-0.3448	-0.4621	-0.6499	-0.6014	0.1984	0.3237	-0.303	0.0431	0.5346	0.6074	0.1579	-0.4844	-0.1346	-0.0248	-0.4494	-0.742	-0.1617	0.0259	-0.4125	-0.7339	-0.5192	-0.3889	0.045	-0.6501	-0.0153	0.1569	-0.0563	0.1401	0.2148	-0.1703	-0.0821	-0.4971	-0.2692	-0.313	-0.51	0.3575	-0.408	-0.3099	0.7526	0.4727	-0.347	-0.1781
BP0706	putative membrane protein	0.0933	0.2516	0.5291	-0.282	0.2826	0.1071	0.2279	-0.1716	-0.0439	-0.1904	0.1655	0.1417	0.2388	0.1495	0.228	-0.0312	-0.1895	0.1523	-0.0628	0.3515	0.05	-0.0245	0.0853	0.0993	0.1358	0.1009	0.0999	0.1353	-0.117	-0.2295	0.0944	-0.1691	-0.0255	0.5404	0.312	-0.082	0.2132	0.1787	0.2276	0.0269	-0.0448	0.2224	0.2229	-0.1316	-0.1003	0.2172	0.0836	-0.0081
BP0707	conserved hypothetical protein	0.2778	0.2396	0.1491	0.2932	0.1554	-0.4695	-0.3373	-0.0191	-0.2279	-0.1656	0.2457	0.2756	0.383	0.2365	0.2058	0.7111	0.2274	0.1611	-0.0077	-0.2176	-0.1664	-0.1336	0.2501	0.4863	0.1606	0.1189	0.279	0.4362	0.1877	0.1291	0.3182	0.2556	0.1738	0.0861	0.2405	0.0457	0.0251	0.1288	0.2496	0.4397	0.1471	0.1717	0.0902	0.0711	0.3982	0.4828	-0.0155	0.4969
BP0708	putative membrane protein	0.4689	0.2139	0.3193	0.2316	0.2933	-0.177	-0.3525	0.1908	0.0937	0.1131	0.4995	0.5034	0.2307	0.3028	0.3496	-0.1682	0.2962	0.3279	0.2193	0.9205	0.1102	0.3165	0.4933	0.4635	0.3247	0.5124	0.3821	0.4192	0.1953	0.1299	0.6311	0.3186	0.3721	0.8535	0.5216	0.2152	0.1945	0.2279	0.1108	0.531	0.2954	0.5086	0.4269	0.1604	0.3861	0.3796	0.5839	0.3906
BP0709	aspartyl-tRNA synthetase	-0.1917	-0.1708	-0.3229	0.047	-0.1746	-0.5005	-0.2596	0.2493	-0.3475	-0.4048	0.0908	-0.0057	0.1271	-0.0004	-0.0769	-0.1823	0.0942	-0.1804	-0.1075	-0.094	-0.2044	-0.1577	0.0675	0.4119	-0.1946	-0.2606	0.0628	0.3531	-0.3118	-0.13	0.0186	-0.0466	0.1877	-0.103	0.1509	0.009	0.0885	0.2222	-0.0109	0.5483	0.1517	0.1553	0.0223	-0.0842	0.2032	0.1167	0.1407	0.5274
BP0710	putative endonuclease/exonuclease/phosphatase family protein	-0.1699	-0.0888	-0.111	0.073	0.1293	-0.3026	-0.2779	0.3174	0.0795	0.1796	0.1213	0.0727	0.0713	0.1639	-0.0546	-0.2782	0.0631	-0.0064	0.0843	-0.1921	-0.2146	-0.2443	0.0287	0.4323	-0.1004	-0.0618	0.1373	0.1938	0.0422	-0.0948	0.1596	0.6029	0.125	0.0269	0.2575	-0.1929	-0.0234	0.1194	0.121	0.3934	0.0595	0.1181	0.164	0.2979	0.5732	0.3084	0.4066	0.1174
BP0711	putative phospholipase	-0.3701	0.1982	0.1904	-0.127	0.488	-0.2654	-0.6273	-0.3822	-0.2574	0.0938	0.1074	0.0466	0.0965	0.1539	0.1647	0.6467	-0.0254	0.2809	0.1293	-0.5392	-0.0836	0.0375	0.1776	0.2386	0.1131	-0.1709	0.2241	-0.1841	0.1535	0.1285	0.302	0.4326	0.3295	-0.0529	0.2566	-0.0154	0.2085	-0.0838	0.0128	-0.0071	-0.087	0.3187	0.1233	0.1912	0.5701	0.7084	0.3839	0.0242
BP0712	putative membrane protein	0.2786	-0.142	-0.6254	-0.4183	0.1349	-0.5174	-0.6741	-0.4812	-0.3366	-0.1923	0.2415	0.423	0.2888	0.1693	0.5026	-0.2354	0.2077	-0.0927	-0.1569	-0.1716	-0.2532	-0.3875	-0.0219	0.1496	-0.1632	-0.2512	-0.238	-0.358	0.2854	-0.3039	0.2318	0.3353	-0.1523	0.1334	0.4739	-0.1658	-0.3471	-0.2168	-0.5313	-0.2009	-0.2226	0.2527	-0.0401	-0.0987	0.7823	0.6959	-0.2903	-0.2895
BP0713	putative membrane protein (Pseudogene)	0.2115	-0.5013	-0.8423	-0.9163	-0.3062	-1.013	-1.6826	-1.3274	-1.1604	-0.3344	0.0526	0.019	-0.499	0.0277	0.3993	-0.4682	-0.301	-0.7878	-0.7795	-0.8655	-0.5715	-0.847	-0.3233	-0.2457	-0.6035	-1.085	-1.1325	-1.1514	0.0103	-0.7219	-0.0562	0.545	-0.414	-0.3997	0.0059	-0.4502	-0.0936	-0.7801	-1.2165	-1.0677	-1.0387	0.2018	-0.8508	-0.4628	0.866	0.5071	-0.7172	-0.9141
BP0715	putative membrane protein (Pseudogene)	-0.3516	-0.5388	-0.525	-0.7122	-0.4372	-0.4721	-0.5869	-0.8517	-0.7916	-0.6497	-0.1969	-0.2023	-0.3231	-0.1692	-0.3953	-0.5257	-0.4308	-0.8681	-0.7799	-0.5433	-0.4804	-0.8237	-0.4686	-0.2743	-0.6059	-0.6572	-0.6483	-0.7357	-0.0538	-0.3842	-0.2717	-0.1949	-0.3381	-0.5969	-0.3343	-0.586	-0.4112	-0.4573	-0.7933	-0.52	-0.6523	-0.1191	-0.4576	-0.3341	0.4657	0.3206	-0.8804	-0.4407
BP0716	transposase (Pseudogene)	-0.1077	-0.9364	-1.3924	-1.0823	-0.5925	-1.0869	-1.4368	-1.219	-1.4294	-0.9433	-0.2623	0.0922	-0.7941	-0.1987	0.053	0.9612	0.0389	-1.1198	-0.9881	-1.021	-0.835	-0.8859	-0.5938	0.0331	-0.7462	-1.0192	-1.1056	-1.1471	0.0595	-0.8347	-0.2862	0.1612	-0.8909	-0.4985	0.0967	-0.7053	-0.6345	-0.7651	-1.3936	-1.1084	-1.0093	-0.0366	-1.2216	-0.7989	0.5707	-0.047	-1.2737	-1.0493
BP0718	carboxyvinyl-carboxyphosphonate phosphorylmutase	0.156	-0.0963	0.9862	-0.6253	-0.2487	-0.3861	-0.2561	-0.6495	-0.4067	-0.7066	0.701	0.2703	0.1883	0.1762	0.045	-1.3366	-0.25	-0.1801	-0.5056	0.3091	-0.2876	-0.717	-0.4721	-0.0732	-0.0995	0.3442	-0.1125	-0.3963	-0.0915	-0.4469	0.783	0.3074	-0.3872	0.3547	0.4266	-0.3688	-0.1384	0.0171	0.0678	-0.363	-0.4288	0.0678	-0.3646	-0.0636	0.4075	1.1608	-0.0593	-0.2844
BP0720	conserved hypothetical protein	-0.2181	-0.372	-0.8441	-0.2219	-0.6191	-0.978	-0.9341	-0.3419	-0.7789	-1.4189	-0.4433	-0.3951	-0.3488	-0.2656	-0.5512	0.2976	-0.2505	-0.4919	-0.725	-1.6258	-0.5678	-0.7755	-0.3509	0.2155	-0.3516	-0.5139	-0.4125	-0.2727	0.1461	-0.4605	0.2226	1.024	-0.4866	-1.54	-0.351	-0.6255	-0.5151	-0.3838	-0.8064	-0.0659	-0.6273	-0.2503	-0.442	-0.3008	1.1831	0.7229	-0.959	-0.15
BP0721	probable aminotransferase	-0.0681	0.1269	-0.2033	-0.076	-0.2314	0.3023	0.405	0.9963	0.9338	-0.2836	0.1983	0.0797	0.4219	0.2498	0.0476	0.0668	-0.0987	0.1001	-0.2263	-0.1577	0.2813	0.1739	0.4162	0.6243	0.0617	0.0092	0.2005	0.3685	0.3131	0.5128	0.9224	0.2669	0.1732	0.4705	0.3505	0.1818	0.0163	0.4416	0.3725	0.8224	0.6485	0.2894	0.6329	0.1352	0.4113	0.3451	0.1341	0.6768
BP0722	probable amidase	-0.0346	-0.0912	-0.1907	-0.281	-0.1283	-0.0919	-0.1295	0.3467	0.3387	-0.4348	0.1598	0.2153	0.1499	0.3816	0.3416	0.2615	0.2968	0.0645	-0.1959	-0.5036	-0.0116	-0.2171	0.1061	0.4371	-0.0181	0.0821	0.1878	0.1214	0.3529	0.1707	0.7229	0.189	0.06	0.0216	0.4869	0.0524	-0.2621	-0.1511	-0.069	0.2949	0.2841	0.3613	0.3193	-0.2244	0.5696	0.3601	-0.0743	0.1069
BP0723	probable ABC transporter, ATP-binding protein	0.1072	-0.247	-0.0752	-0.058	0.2313	-0.1495	0.1149	0.9641	1.1228	0.0638	0.3376	0.2856	0.5724	0.442	0.2648	0.4227	0.3209	0.0152	0.2015	-0.0942	0.1284	0.0963	0.8736	1.0645	0.2524	0.1299	0.2913	0.611	0.4689	0.7097	0.7773	0.4413	0.2179	0.562	0.609	0.2938	0.1307	0.2471	0.8082	0.9394	0.4731	0.4176	0.6802	0.0123	0.9201	0.3594	1.054	0.7406
BP0724	probable ABC transporter, permease protein	-0.1609	-0.0033	-0.4239	-0.4056	-0.1183	-0.1235	-0.4228	0.5162	0.5152	0.0877	0.1513	0.5062	0.0039	0.1946	0.2675	0.4736	0.2895	-0.1671	-0.0791	-0.3187	0.1177	-0.667	0.2055	0.0101	-0.0537	-0.0243	-0.1202	-0.1349	0.4424	0.3275	0.367	0.1226	-0.0585	0.2652	0.7209	-0.0447	-0.1627	-0.1173	-0.4493	0.2074	-0.1586	0.3987	0.3919	-0.3726	0.2255	0.2376	0.3024	-0.0641
BP0725	probable ABC transporter, permease protein	-0.2661	-0.0325	-0.2018	-0.1084	-0.3685	0.1198	0.1913	0.6938	0.7219	-0.421	0.1729	0.3986	0.0232	0.1761	0.3179	0.1942	0.3952	-0.031	-0.066	-0.008	0.1553	-0.0635	0.2618	0.6091	0.3669	0.3269	0.2018	0.2432	0.3972	0.4518	0.5189	0.5162	0.2887	0.4288	0.556	-0.0525	0.006	0.3774	0.0363	0.551	0.49	0.1875	0.4421	0.1409	0.6436	0.565	0.0863	0.5861
BP0726	probable ABC transporter, periplasmic binding protein	-0.2369	0.0966	0.0934	-0.2331	-0.0268	0.1783	0.1274	0.5216	0.6363	-0.0394	0.1832	0.1133	0.2773	0.2377	0.1291	0.1896	0.145	0.3094	-0.0116	-0.1808	-0.2169	-0.0047	0.4133	0.7221	-0.0715	-0.1022	0.267	0.2555	0.6833	0.7192	1.1162	0.2734	0.4499	0.2985	0.4685	0.0548	0.0281	0.3788	0.5587	0.4841	0.3756	0.2098	0.4846	0.1117	0.6391	0.6513	0.3609	0.3423
BP0727	probable transcriptional regulator	-0.0125	-0.1308	-0.3649	0.1152	0.2034	-0.2243	-0.2935	0.5374	0.2058	-0.4585	0.2216	0.1812	0.263	0.2394	0.2315	0.4357	0.4287	0.0439	0.1165	-0.1415	-0.0306	0.3094	0.7622	0.7639	0.0454	0.2673	0.3253	0.6885	-0.0638	-0.1433	0.2454	-0.0613	0.1573	0.116	0.2704	0.0827	-0.1452	-0.034	0.2466	0.6696	0.4561	0.3586	0.3901	-0.0786	0.5799	0.1312	0.2394	0.6439
BP0728	probable transcriptional regulator	0.5229	0.1106	0.6844	-0.3385	0.1091	-0.45	-0.2143	-0.4602	-0.2425	-0.0919	0.3157	0.2012	0.373	0.0522	-0.0973	0.0657	-0.3586	0.3567	0.0843	0.3101	-0.0457	-0.2624	-0.0283	0.2238	-0.0354	0.1127	0.0682	-0.2427	-0.1477	0.1542	0.4341	0.4693	0.2154	0.3874	0.272	-0.0846	0.1252	0.1062	-0.0998	-0.1051	-0.0733	0.0754	0.1304	0.1736	0.5161	0.5474	0.2306	0.0627
BP0731	carboxynorspermidine decarboxylase	0.0081	0.2414	-0.025	0.1221	-0.064	-0.1681	-0.0215	0.1447	-0.2048	-0.2992	0.2367	0.2163	0.3796	0.0069	0.0353	-0.3551	0.0482	-0.0838	-0.0144	-0.1094	-0.1781	-0.1443	0.02	0.2506	-0.1423	-0.3171	-0.0218	0.2487	0.3155	0.512	0.5969	-0.1432	0.28	0.1307	-0.0241	-0.0297	-0.0889	0.2827	0.0165	0.38	0.1962	0.1003	-0.1325	-0.2436	0.3098	-0.0185	-0.2445	0.4847
BP0732	putative exported protein	-0.35	0.0228	-0.0785	-0.0508	-0.1451	-0.2717	-0.1473	0.1306	-0.1408	-0.5351	0.1785	0.1548	0.5192	0.0153	-0.3121	0.1704	-0.1888	-0.2996	-0.1698	-0.6377	-0.2867	-0.7257	-0.439	0.2493	-0.1665	-0.2964	0.0244	0.1338	0.5097	0.5588	0.5259	-0.1421	0.0691	-0.327	-0.0225	0.0337	-0.2417	-0.015	-0.0247	0.2961	-0.2405	0.1801	-0.1584	-0.2106	0.2278	-0.041	-0.4434	0.369
BP0734	hypothetical protein	-0.1075	0.1693	-0.2087	1.2479	0.0453	-0.158	-0.3573	0.218	0.339	-0.23	0.1531	0.4101	0.0708	0.4748	0.2955	0.1631	0.338	0.3018	-0.1507	-0.2968	0.2346	-0.1493	0.0928	0.3881	0.3209	0.0501	0.2301	0.5584	0.8284	0.7302	0.5257	0.8486	0.3307	0.1979	0.2339	0.1216	1.3328	0.0946	0.1126	0.567	0.013	0.5286	0.4577	0.2405	0.8721	0.7571	-0.142	0.3596
BP0735	putative exported protein	-0.0131	0.0527	0.4967	-0.291	0.2023	-0.3294	-0.1101	-0.3349	-0.2554	-0.2046	0.2839	0.169	0.3062	0.2412	0.0851	0.2407	-0.1959	0.0464	-0.1186	-0.3213	-0.071	-0.451	-0.257	0.1799	-0.0674	0.0421	0.1287	-0.0846	-0.0443	-0.1922	0.0182	0.2142	0.0062	-0.0104	0.2812	-0.0483	0.0709	0.1779	-0.0798	0.0445	-0.1762	0.2171	-0.0328	0.032	0.4584	0.7371	0.039	0.0221
BP0736	putative ferric siderophore receptor	0.4217	-0.5005	-0.4382	-0.3704	0.0227	-0.1291	-0.2355	-0.368	-0.8613	-1.0067	0.3177	0.0923	0.0821	-0.154	0.3921	-0.0136	0.0561	-0.7597	-0.2243	-0.1551	-0.4962	-0.4481	0.765	0.6695	-0.2858	-0.4939	-0.251	-0.2446	-0.6531	-0.8878	0.1478	0.1968	-0.3649	0.1993	0.0344	-0.1954	0.0253	0.0114	-0.4135	-0.1489	-0.415	0.0098	-1.1333	-0.1615	0.5147	0.4681	-0.9615	-0.0863
BP0737	putative inner membrane sensor for iron transport	0.3236	0.4322	0.7015	0.2964	0.0463	0.1191	0.3861	0.2964	0.6598	-0.0188	-0.0366	0.2995	0.4705	0.4394	-0.0261	0.3957	0.1325	0.6273	0.3005	-0.0684	0.7047	0.5731	0.318	0.8506	0.2554	0.6395	0.7728	0.824	-0.1803	0.0446	-0.1971	0.7623	0.274	-0.1202	0.585	0.0328	0.5025	0.7357	0.7715	1.0027	0.5355	0.3407	0.7924	0.65	0.7161	0.2462	0.4491	0.9649
BP0738	ECF-family sigma factor Pseudogene)	0.2019	-0.039	-0.3593	-0.2908	-0.2147	-0.0319	0.1428	0.4826	0.1281	-0.2862	-0.0604	0.0471	-0.1174	0.2042	0.3574	-0.1343	0.3987	-0.4985	-0.0789	0.0818	0.0531	0.0161	-0.2221	0.2846	-0.0989	-0.3969	-0.1972	-0.2427	-0.0501	-0.7046	0.0824	0.5469	-0.2487	0.3208	0.2959	-0.0765	0.1021	0.0514	-0.7565	-0.005	-0.0614	0.1162	0.0039	0.0476	0.6523	0.6287	-0.4069	0.0287
BP0740	putative DNA methylase	0.0847	0.056	-0.0036	-0.07	0.1082	-0.6208	-0.7831	-0.3082	-0.0484	-0.4878	-0.0882	0.0714	-0.1295	0.2425	0.2504	-0.4056	0.0134	0.018	-0.1033	-0.5923	-0.1432	-0.3601	-0.0097	0.5888	0.0038	-0.0742	0.1134	0.181	0.0887	-0.4279	-0.1866	0.0176	-0.2829	-0.1658	0.2592	-0.1378	0.1413	0.2398	-0.033	-0.0416	-0.4595	0.1824	-0.0136	-0.0906	0.3946	0.2296	-0.1796	0.0698
BP0741	putative transcriptional regulator	-0.2079	-0.2613	0.1709	-0.5629	-0.2143	-0.5157	-0.4376	-0.6375	-0.5109	-0.4153	0.0309	0.0363	-0.0419	-0.002	-0.0746	0.0977	-0.5622	-0.1628	-0.2741	-0.621	-0.3551	-0.6925	-0.6142	-0.1007	-0.2353	-0.451	-0.1618	-0.4765	0.02	-0.0855	0.0336	0.8261	-0.1572	-0.376	-0.0773	-0.2361	-0.2736	-0.3125	-0.1162	-0.4994	-0.5921	-0.1073	-0.1021	0.0048	1.1843	1.2765	-0.3417	-0.3994
BP0742	transposase (Pseudogene)	0.0753	-0.818	-0.8901	-0.897	-0.1775	-1.0423	-1.0288	-0.7034	-0.4271	-0.626	0.3048	0.1233	-0.164	-0.0402	0.7013	-0.168	0.4894	-0.7619	-0.5926	-1.0827	-0.3533	-1.4521	-0.4945	0.2478	-0.543	-0.3317	-0.645	-0.8809	-0.1608	-0.9382	-0.2691	0.483	-0.6378	-0.0656	0.151	-0.3341	-0.5591	-0.7191	-0.9374	-0.4685	-1.3646	0.1297	-0.4475	-0.6275	0.6855	0.6821	-1.1636	-0.7131
BP0744	putative transcriptional regulator	-0.1518	-0.121	0.3331	-0.5375	0.0684	0.1358	-0.1448	-0.4668	0.0312	-0.0705	-0.153	-0.0043	-0.02	0.5097	0.1261	-0.2311	-0.3466	0.441	0.1845	-0.5628	0.2204	0.0049	-0.2061	0.1543	0.2936	-0.056	0.4225	-0.2156	-0.0627	-0.3681	-0.3004	0.6912	0.4022	-0.0865	0.5167	0.0763	0.3197	0.3175	0.2515	-0.179	0.1683	0.4182	0.4122	0.3513	1.0169	1.1003	0.373	-0.0462
BP0745	putative transcriptional regulator	-0.6502	-0.1901	-0.7639	-0.8056	-0.2297	-0.5187	-0.9298	-0.6523	-0.7127	-0.3714	-0.2986	-0.2709	-0.3628	-0.2349	-0.2579	-0.3515	-0.4005	-0.6906	-0.7608	-0.2708	-0.8309	-0.9643	-0.5441	0.0743	-0.6008	-0.8413	-0.9124	-0.7469	-0.1711	-0.293	-0.2342	0.1098	-0.1351	-0.2531	-0.0936	-0.4991	-0.7109	-0.8796	-0.8207	-0.9133	-0.6932	-0.3326	-0.6815	-0.4199	0.2354	0.3213	-0.5023	-0.4154
BP0746	glutamate 5-kinase	0.117	0.1623	0.2676	0.3705	0.3133	-0.2479	-0.2805	0.1902	0.1342	-0.1565	0.1152	0.3471	0.2708	0.2028	-0.1265	-0.1155	0.1051	0.4008	0.1014	-0.4002	0.3214	0.2369	0.1538	0.5742	0.1826	0.2315	0.2509	0.3935	-0.0723	-0.3249	-0.1424	0.5051	0.1487	-0.1856	0.2423	-0.0004	0.0891	0.2335	0.0265	0.4382	0.2917	0.3222	0.2757	0.1567	0.5064	0.5856	-0.0338	0.4356
BP0747	probable GTP-binding protein	-0.0376	-0.0171	-0.079	0.1278	-0.1367	-0.278	-0.3858	0.2198	0.0869	-0.5795	0.1048	0.1001	0.1482	0.2085	-0.0096	-0.3744	0.1507	-0.0282	-0.0044	-0.4507	-0.0436	0.0449	0.1327	0.4909	0.0479	0.1458	0.1308	0.292	-0.1498	-0.2607	0.1164	0.4586	0.064	-0.2213	0.2237	-0.0356	-0.0755	0.0011	0.0119	0.33	0.1435	0.0846	0.1492	0.1797	0.3608	0.3298	-0.2751	0.3486
BP0748	50S ribosomal protein L27	0.2102	0.3967	0.8225	-0.3307	-0.0054	0.123	0.2309	-0.4364	0.0108	0.3667	0.0812	0.1981	0.5953	0.3058	0.1778	0.2711	-0.2878	0.5002	-0.0968	-0.9018	0.1769	-0.2711	-0.3906	0.0021	0.1341	-0.1067	0.282	-0.3393	0.0712	0.013	0.4262	-0.1404	-0.0022	-0.5778	0.3293	-0.1626	0.1787	0.0744	0.0573	-0.3415	-0.3885	0.1	0.2287	-0.2552	0.026	0.5524	0.2533	-0.3986
BP0749	50S ribosomal protein L21	0.0497	0.4634	0.306	0.3529	-0.0725	0.1601	0.1134	0.5816	0.0872	-0.1258	0.1537	-0.0558	0.4626	0.1188	0.1628	0.367	0.5056	0.0675	0.0077	-0.1317	0.1062	0.3283	0.5556	0.5638	0.276	0.2096	0.2404	0.6398	-0.2384	-0.026	0.1615	-0.9005	0.1064	0.0785	-0.291	-0.2249	0.2979	0.1623	0.0718	0.441	0.4506	-0.1727	-0.0499	-0.3382	-0.6265	-0.3933	-0.0952	0.46
BP0750	conserved hypothetical protein	0.3016	-0.2156	-0.0783	-0.1172	-0.0906	-0.1984	-0.1238	0.0903	0.1067	-0.1771	0.0051	0.1971	-0.0022	0.1461	0.2921	0.0545	0.0925	0.1188	0.2991	0.2177	0.0381	0.1496	0.2753	0.5135	0.1753	0.1553	0.344	0.369	0.0115	-0.2414	-0.1125	-0.0101	0.226	0.2527	0.1391	0.0405	0.0976	0.0918	0.0083	0.2118	0.2539	0.3707	0.2655	-0.043	0.4405	0.325	0.2955	0.3417
BP0751	octaprenyl-diphosphate synthase	0.0041	0.1649	0.6066	-0.608	0.0983	-0.5087	-0.4935	-0.5711	-0.1688	0.5925	0.0847	0.1952	0.2879	0.2642	-0.0082	0.0776	-0.3603	0.7984	0.3104	-0.1304	-0.0395	-0.0467	-0.012	0.199	0.1432	-0.0101	0.3119	-0.1299	0.2369	-0.0713	0.1854	0.3088	0.2136	-0.0134	0.3762	-0.0692	0.3811	0.4858	0.0303	0.0199	-0.0017	0.3034	0.3569	0.1332	0.4915	1.0412	0.7645	0.0875
BP0752	LysR-family transcriptional regulator	0.1415	0.2716	0.4117	-0.3864	0.2759	-0.1402	-0.3851	-0.6423	-0.2687	0.3212	0.2786	0.1466	0.056	0.2432	0.0568	-0.0093	-0.3314	0.212	0.1745	-0.1136	0.0023	-0.0657	-0.37	-0.1569	-0.01	-0.1237	-0.156	-0.4008	0.5101	0.0867	0.2414	0.7796	0.3217	-0.0878	0.1716	0.1448	0.1461	0.0543	-0.098	-0.2628	-0.1759	0.4495	0.1354	0.3905	0.7886	0.8801	0.3775	-0.2013
BP0753	putative hydantoin utilization protein A	-0.062	-0.1505	-0.6945	-0.6156	-0.2403	0.5688	-0.8238	-0.5684	-0.6219	-0.2562	0.1723	0.1918	-0.1912	0.1867	0.3308	0.752	0.0824	-0.3251	-0.4786	-0.527	-0.5069	-0.5507	-0.1485	0.2581	-0.3035	-0.7155	-0.4395	-0.459	0.2293	-0.5338	0.0135	0.2355	-0.1939	-0.336	0.1396	-0.251	-0.3565	-0.4745	-0.6695	-0.5252	-0.5453	0.131	-0.4984	-0.0578	0.9341	0.5128	-0.3527	-0.5418
BP0754	hydantoin utilization protein B	0.048	-0.0458	-0.2375	-0.1488	-0.1124	-0.2824	0.0434	-0.06	-0.5311	-0.8027	0.393	0.4367	-0.0259	-0.1015	0.11	0.3395	0.5259	-0.5453	-0.3225	0.0597	-0.2362	-0.0951	0.0415	0.7252	0.1978	0.175	-0.3225	0.0433	-0.3704	-0.6102	0.0815	0.2187	-0.4454	0.2162	0.0144	-0.2361	-0.0275	0.2136	-0.3064	0.0078	-0.2358	0.1601	-0.478	0.0852	0.4013	0.1764	-0.8606	0.2145
BP0755	putative amino acid deaminase	0.1551	-0.4785	-0.5423	-0.7105	-0.015	-0.8649	-1.4755	-0.642	-0.6349	-0.3608	-0.0177	0.4122	-0.2714	-0.1349	0.548	0.1894	-0.3439	-0.4136	-0.2456	-0.3501	-0.4886	-0.7252	-0.4105	-0.3049	-0.1823	-0.4557	-0.3931	-0.5729	0.0863	-0.9328	-0.4005	-0.1239	-0.2078	0.0364	0.2924	-0.189	-0.4276	-0.5465	-0.7715	-0.7525	-0.6174	0.2712	-0.4774	-0.448	0.9006	0.9901	-0.1543	-0.9986
BP0756	putative exported protein (Pseudogene)	0.0813	0.2246	0.0968	-0.2608	-0.0079	-0.0151	0.2005	-0.1984	-0.2948	-0.5553	0.1191	0.0408	0.1144	-0.0954	-0.0912	-0.3279	-0.1841	-0.2939	-0.3149	-0.2027	-0.3508	-0.2493	-0.1198	0.2287	-0.0845	0.013	-0.0857	0.1129	-0.3613	-0.3822	-0.2367	0.2581	-0.5141	0.183	-0.0086	-0.5483	0.3136	0.2096	0.3625	0.2576	-0.1286	0.0268	-0.0248	0.1604	0.3327	0.4081	-0.3134	0.3542
BP0757	succinate-semialdehyde dehydrogenase [NADP+]	-0.4813	-0.8036	-0.4527	-0.6931	-0.2308	-0.584	-0.4592	-0.7377	-0.8434	-0.8684	-0.455	-0.1545	-0.5006	-0.1495	-0.3047	-0.2061	-0.3344	-0.5968	-0.5444	-0.6647	-0.5168	-0.8931	-0.4231	-0.2014	-0.598	-0.7023	-0.7575	-0.5432	-0.3547	-0.8952	-0.4861	0.0559	-0.5871	-0.6067	-0.2279	-0.5206	-0.4167	0.0011	-0.3368	-0.4972	-0.9964	-0.0329	-0.4983	-0.5395	0.3729	0.2932	-0.4629	-0.5315
BP0758	cyclolysin-activating lysine-acyltransferase	-0.049	-0.262	-0.7406	-0.0494	-0.2584	-0.3612	-0.4971	0.5545	0.307	-0.454	-0.3125	-0.0469	-0.0794	0.2004	0.2046	-0.0106	0.5622	0.0881	0.0117	-0.741	0.1897	0.2494	0.742	0.9381	0.0427	0.0189	0.4578	0.6256	-0.5161	-0.9102	-0.3759	-0.3574	0.0044	-0.4832	0.2407	-0.0665	0.0315	0.1408	0.0354	0.6232	0.4535	0.3352	0.4637	0.2517	-0.2103	-0.5555	0.0484	0.4754
BP0760	bifunctional hemolysin-adenylate cyclase precursor	-0.2612	0.043	0.0022	-0.3169	-0.1038	0.1855	0.1554	0.1007	0.0326	-0.2448	0.0488	0.0037	0.4279	0.1403	-0.0711	0.388	-0.15	-0.0061	-0.082	-0.1035	-0.1158	-0.1747	-0.1143	0.3271	-0.2467	-0.3378	-0.0006	-0.2442	0.0545	-0.0319	0.1074	0.3297	0.2852	-0.0251	0.1665	-0.0007	0.0156	0.0197	0.1007	-0.0054	-0.0098	0.2538	-0.0487	-0.0428	0.4367	0.43	-0.1338	0.2281
BP0761	cyclolysin secretion ATP-binding protein	-0.1763	-0.1957	0.4922	-0.6057	0.0687	0.3612	0.1883	-0.1533	0.2595	-0.0069	-0.0404	0.055	0.1269	0.1528	0.1084	-0.0969	-0.1437	0.2075	0.0112	0.0403	-0.1153	-0.5439	-0.2299	0.0421	-0.242	-0.1844	0.0181	-0.4571	-0.3084	-0.4906	-0.2072	0.1748	0.0002	0.3473	0.4407	-0.1732	-0.1506	0.0335	0.182	-0.204	-0.192	0.0893	0.0835	-0.112	0.3399	0.6297	0.1912	-0.2513
BP0762	cyclolysin secretion protein	0.1273	-0.1667	0.3163	-0.0955	-0.1787	0.2699	0.3187	0.1912	0.4056	-0.5285	-0.1974	-0.2552	0.0683	0.1228	-0.2209	0.2218	0.0055	0.0496	0.0203	-0.983	-0.0694	0.0199	0.136	0.4102	-0.1094	-0.3385	0.1672	0.2748	-0.5405	-0.3017	-0.3822	0.1475	0.109	-0.2585	0.3433	-0.2133	-0.1377	0.1437	-0.1121	0.4069	0.19	-0.1424	0.2106	-0.1051	0.326	0.3908	-0.0534	0.3846
BP0763	cyclolysin secretion protein	-0.1019	-0.0981	0.4971	-0.5063	-0.2957	-0.0349	-0.169	-0.2245	0.0555	-0.4889	-0.2504	-0.0715	-0.059	-0.0543	-0.0485	0.3756	-0.154	-0.1118	-0.4891	-0.3602	-0.2355	-0.572	-0.4345	0.0899	-0.3528	-0.3307	-0.0899	-0.415	-0.247	-0.6592	-0.2776	0.2927	-0.3916	0.0669	0.3105	-0.4546	-0.0323	-0.0917	-0.0747	-0.321	-0.3787	0.0371	-0.0817	-0.1099	0.4076	0.7988	-0.3544	-0.2224
BP0764	probable LysR-family transcriptional regulator	-0.1087	-0.0905	0.0445	-0.2876	-0.0553	-0.2419	-0.1229	-0.1352	0.073	-0.3544	0.0179	0.1904	-0.077	-0.0184	0.1003	0.0312	0.0726	-0.3628	-0.1665	0.2917	0.0421	-0.4467	0.0861	0.2501	-0.2507	-0.0503	-0.3393	-0.3429	-0.0627	-0.4708	0.1868	0.2967	-0.1153	0.0901	0.2134	-0.251	-0.1929	0.081	-0.2082	-0.0219	-0.3046	0.0607	-0.2066	-0.2228	0.3955	0.5919	-0.4796	-0.0441
BP0765	probable extracellular solute-binding protein	0.4715	-0.4693	-0.3611	-0.4247	-0.3377	-0.6129	-0.0196	0.5351	-0.0856	-0.4216	0.1035	0.0637	0.1005	0.2601	0.3178	0.2055	0.0137	-0.18	-0.0329	-0.0852	-0.2044	-0.3026	-0.0919	0.2047	-0.1812	-0.5104	-0.141	-0.039	0.1426	0.2047	0.1711	0.1312	-0.0164	0.0439	0.364	0.0818	-0.0532	0.0493	0.2636	-0.2594	-0.3664	0.1329	-0.2645	-0.118	0.6306	0.6647	0.0328	-0.2562
BP0766	glutamate/aspartate transport system permease protein (Pseudogene)	0.3509	-0.8376	-1.0228	-1.0509	0.0886	-0.838	-1.392	-0.9815	-0.9134	-0.5041	0.4359	0.643	-0.321	0.4121	1.2971	0.3564	0.341	-1.2652	-0.5405	-0.3596	-0.6905	-0.024	-0.302	0.368	-0.7851	-0.4767	-1.6698	0.0327	0.2445	-1.0255	0.0159	0.133	-0.9783	0.2348	0.7538	-0.6237	-0.6076	-1.1675	-0.4404	-1.4385	-0.4321	0.3442	-1.1185	-1.1349	0.8817	-0.1134	-0.828	-0.9128
BP0767	glutamate/aspartate transport system permease protein	0.0302	-1.1741	-1.2602	-1.6189	-0.5555	-1.2763	-1.8289	-1.4083	-1.2444	-0.4941	0.1512	0.6262	-0.2082	0.1932	0.642	0.763	-0.0912	-1.5883	-0.8544	-0.0488	-0.6859	-1.7292	-0.409	-0.6842	-0.5617	-1.1914	-1.9143	-1.2834	0.3928	-1.3595	-0.3264	0.0391	-0.9579	0.1293	0.2623	-0.6024	-0.7969	-1.0253	-1.2368	-1.6773	-0.7485	0.5336	-1.0624	-1.2022	0.7523	0.3426	-1.3888	-1.3231
BP0768	glutamate/aspartate transport ATP-binding protein	0.2705	-0.2535	-0.6663	-0.3496	0.3788	0.3094	0.5474	-0.4143	-0.4539	-0.352	0.4048	0.4905	0.1594	0.0427	0.4773	0.1864	0.4882	-0.659	-0.2219	0.0403	-0.2003	-0.5051	0.1984	0.5843	-0.0316	-0.3268	-0.1905	-0.5191	0.2519	-0.7219	0.0806	0.3215	-0.1827	0.3164	0.3078	-0.0799	0.0252	0.2832	-0.5055	-0.3919	-0.237	0.5546	-0.3813	0.2325	0.7312	0.4983	-0.7052	-0.5522
BP0769	probable aminotransferase	0.2133	-0.5696	-1.1722	-0.8088	-0.1363	-0.5571	-0.8906	-0.7653	-0.9063	0.0225	0.1363	0.6186	-0.398	0.0879	0.5395	-1.0771	0.2316	-1.1847	-0.5529	-0.3394	-0.3836	-0.9421	-0.2879	-0.057	-0.7945	-0.4211	-0.7421	-1.0536	0.3485	-1.1076	-0.4388	-0.0422	-0.4373	0.1008	0.251	-0.3492	-0.6973	-0.7342	-0.6649	-0.5102	-1.1477	0.2932	-1.0363	-1.0067	0.9078	0.3647	-0.5351	-0.6109
BP0770	putative membrane protein	-0.5062	-0.7579	-0.925	-0.4586	-0.6586	-0.6153	-0.7087	-0.4499	-0.5227	-1.0526	-0.6466	-0.6028	-0.7114	-0.369	-0.7016	-0.115	-0.4511	-0.8969	-0.9403	-1.5389	-0.7619	-0.7919	-0.6093	-0.2562	-0.646	-0.7707	-0.5928	-0.318	-0.4989	-0.8251	-0.6442	0.9773	-0.4876	-0.9617	-0.5397	-0.9484	-0.7651	-0.7654	-0.739	-0.2799	-0.7225	-0.5602	-0.635	-0.2689	0.7921	0.5351	-0.5829	-0.406
BP0771	putative exported protein	0.2376	-0.7566	-0.7793	-0.7983	-0.2288	-0.4456	-0.5718	-0.5564	-0.6044	-0.3929	-0.1729	0.2431	0.1471	0.086	0.2921	0.3676	-0.0502	-0.8179	-0.4829	-0.663	-0.3978	-0.6947	-0.1085	0.0117	-0.6151	-0.8878	-0.7775	-0.1353	0.1437	-0.8578	-0.1724	0.0794	-0.5134	-0.2651	0.2299	-0.0811	-0.3569	-0.4756	-0.9139	0.163	-0.3615	0.3012	-0.5901	-0.6349	0.729	0.4461	-0.566	-0.5958
BP0772	putative acetoacetyl-CoA reductase	0.3626	-0.0307	0.7967	-0.2931	0.2933	-0.1944	0.2011	-0.3704	-0.1445	-0.228	0.315	-0.2633	0.6458	-0.0904	0.0916	-0.0235	-0.3429	0.2184	0.2288	0.1609	-0.1306	-0.0628	0.5667	0.453	0.0857	0.0768	0.5114	0.4	-0.5944	0.0841	0.3396	0.1146	0.4243	0.4317	0.027	0.136	0.2972	0.5822	0.5181	-0.0323	0.2298	0.1287	-0.4825	0.4367	0.3501	0.7657	-0.0292	0.1924
BP0773	putative acetolactate synthase large subunit	0.3364	-0.2213	0.3345	-0.4498	0.1804	-0.1141	0.2737	-0.1363	-0.4994	-0.6202	0.1359	-0.0017	0.0896	-0.0161	0.2268	-0.1551	-0.0322	0.1087	-0.1585	-0.2183	-0.5394	-0.2545	0.3765	0.1891	-0.1887	-0.5476	0.0022	-0.0416	-0.2772	-0.277	0.0183	0.245	0.2029	0.391	0.38	-0.2698	0.2202	0.1811	0.0601	0.0015	0.1179	-0.0151	-0.211	0.147	0.6651	0.6254	-0.2241	0.0548
BP0774	probable GntR-family transcriptional regulator	-0.1953	0.2224	-0.4199	0.4356	-0.2288	-0.0882	-0.1549	0.5867	0.0863	-0.4412	0.1161	0.0978	0.1782	0.317	0.1358	0.56	0.4677	0.2372	0.051	-0.1377	0.1628	0.2522	0.5584	0.7231	0.1475	0.1971	0.4144	0.8231	-0.1801	-0.3307	0.0207	0.3357	0.2986	-0.1218	0.0923	0.0056	0.0369	0.212	0.1195	0.8931	0.6239	0.0511	0.4233	0.3408	0.4175	0.0252	-0.0373	0.9116
BP0775	hypothetical protein	0.4113	0.3952	0.503	0.0982	0.3762	-0.1556	0.1588	-0.1773	-0.0608	-0.0021	0.2894	0.4039	0.3538	0.2906	0.3431	-0.2869	0.0851	0.3532	0.1276	0.1115	0.091	0.3545	0.4808	0.4396	0.3413	0.2743	0.4364	0.3826	0.06	-0.1847	0.2391	0.3064	0.2081	0.2116	0.5257	0.172	0.5158	0.4226	0.2024	0.2687	0.2437	0.5442	0.3833	-0.0062	0.4546	0.7498	0.4696	0.3012
BP0776	probable GntR-family transcriptional regulator	0.2475	0.3962	-0.0374	0.5785	0.2289	-0.2287	-0.0706	0.3088	-0.1059	-0.1659	0.2774	0.3118	0.6174	0.4598	0.3932	1.3654	0.3788	0.2234	0.362	-0.3722	0.2632	0.0761	0.4143	0.8055	0.0639	0.1889	0.5107	0.7392	0.085	0.1472	0.5963	0.5477	0.3576	-0.374	0.4395	0.3198	0.3124	0.3391	0.1553	0.5256	0.3562	0.5871	0.1688	0.3629	0.6062	0.5076	-0.089	0.5467
BP0777	probable Zinc-binding dehydrogenase	0.293	0.1801	0.6851	-0.4693	-0.1583	-0.1226	-0.0056	-0.2891	-0.382	-1.0722	1.0939	0.1161	0.5114	0.0496	0.0965	0.1655	-0.2022	-0.3373	-0.4221	0.7916	-0.5783	-0.3991	0.485	0.3217	-0.1496	0.6023	0.1017	-0.2525	-0.5436	-0.3686	0.9905	0.0259	-0.4765	0.4815	0.5764	-0.2758	0.3038	0.3462	0.3096	0.0016	-0.0523	-0.0136	-0.5348	0.0726	0.1814	0.8943	0.1529	0.1008
BP0778	putative acetyl-CoA synthetase	0.1796	-0.0076	-0.0583	-0.107	-0.0435	-0.4359	-0.231	0.4128	0.3629	-0.3301	0.1453	0.4715	0.246	0.4757	0.3517	0.4588	0.3272	0.3222	0.2728	0.0405	0.2545	0.0213	0.3634	0.4155	0.3311	0.4234	0.5453	0.3857	0.3636	0.0703	0.1184	0.5703	0.3356	0.3186	0.6502	0.1672	-0.079	0.3353	0.2927	0.7387	0.3584	0.4682	0.722	-0.0559	0.718	0.8176	0.0677	0.3626
BP0779	conserved hypothetical protein	0.5326	-0.2714	-0.7349	-0.4794	-0.0353	-0.5179	-0.8861	-0.3145	-0.4386	-0.7421	0.4926	0.2833	0.1708	0.0197	0.8516	0.312	0.3125	-0.3723	-0.3189	-0.192	-0.4195	-0.4702	0.2137	0.2789	-0.1602	-0.3092	-0.2777	0.0139	0.1625	-0.6449	0.2256	0.4564	-0.2657	-0.0135	0.2838	-0.2414	-0.0893	-0.0483	-0.4217	-0.0034	-0.428	0.4262	-0.2054	-0.1057	1.0011	0.8352	-0.1941	-0.1064
BP0780	putative membrane protein	0.1707	-0.0832	0.145	-0.0989	-0.0668	-0.0371	-0.255	0.3425	0.3973	-0.2534	0.1461	0.5023	0.3082	0.1515	0.4826	0.5624	0.2906	0.124	0.1318	0.1651	0.0203	0.0252	0.4031	0.3336	0.0573	-0.0247	0.2884	0.5898	0.1222	-0.0757	0.0746	0.1157	0.3803	0.4421	0.625	-0.0262	-0.0125	0.3885	0.4141	0.432	0.3531	0.1233	0.5632	0.2049	0.6673	0.5464	0.2107	0.6506
BP0781	probable ABC transporter, ATP-binding component	0.0312	-0.1091	0.4083	-0.4087	-0.114	-0.2759	-0.0704	-0.0294	0.0562	-0.3587	0.5545	0.2647	0.0712	0.1182	0.1585	0.248	0.0777	-0.017	-0.094	0.2008	0.1195	0.0131	0.1528	0.3032	0.2104	0.5871	0.0363	0.0811	-0.0291	-0.322	0.4935	0.2765	-0.0235	0.3627	0.4289	-0.2413	0.0202	0.1705	0.0876	0.1778	0.1276	0.3661	0.5185	-0.0838	0.415	0.6148	0.1304	0.1239
BP0782	putative exported protein	-0.057	0.0363	-0.2021	-0.2462	0.0241	0.2099	0.037	0.4435	0.4089	-0.292	0.1846	0.042	0.2283	0.2689	0.2835	0.364	0.2539	-0.0042	0.0696	-0.1132	0.1089	0.4955	0.1831	0.3868	0.1595	0.0922	0.2062	0.2682	-0.073	0.0531	0.5231	0.4331	0.1252	0.2603	0.3723	0.1359	0.2547	0.3018	0.5889	0.678	0.6977	0.3851	0.4031	0.0952	0.6147	0.4016	0.4017	0.4938
BP0783	putative dioxygenase	-0.0574	-0.4559	-0.2988	-0.7667	-0.2164	-0.1055	-0.5293	-0.2988	-0.1686	-0.0424	0.171	0.1543	0.0926	0.3389	0.2481	0.2696	0.1537	-0.1784	0.082	-0.2238	-0.0345	-0.471	0.2818	0.2242	-0.1509	0.0975	0.0998	-0.2988	-0.0293	-0.2594	0.0033	0.6654	0.0924	0.3565	0.3409	-0.021	-0.0332	0.1808	-0.1723	-0.1072	-0.0751	0.2894	0.3864	0.1772	0.5368	0.6841	-0.3699	-0.0664
BP0784	putative acetolactate synthase large subunit	0.242	-0.4861	-0.6661	-0.4136	0.1099	-0.1473	-0.2343	0.2423	0.4162	-0.301	0.2137	0.1964	0.0575	0.4249	0.5397	0.6819	0.3701	-0.2041	-0.1248	-0.1753	0.1405	-0.106	0.4425	0.3652	-0.0504	0.0158	-0.1662	0.1452	0.1546	-0.2252	0.0873	0.4747	0.2236	-0.0193	0.4692	0.1972	-0.3451	-0.1958	-0.0637	0.3056	0.2404	0.593	0.499	-0.0526	0.8315	0.6599	0.0138	0.2611
BP0785	putative mechanosensitive channel protein	0.2799	0.0763	0.2935	0.2904	0.4153	0.2959	0.2987	0.5595	0.5188	0.0624	0.235	0.3228	0.2678	0.6323	0.5001	-0.3814	0.5814	0.4484	0.3059	0.8363	0.455	0.4428	0.7683	0.8115	0.5267	0.6274	0.5051	0.7553	0.2893	0.0728	0.3319	0.4043	0.4999	0.8189	0.6716	0.3303	0.4253	0.523	0.4297	0.5071	0.7199	0.5433	0.6746	0.5605	0.6618	0.7365	0.4012	0.5016
BP0787	N-terminal region of a putative membrane protein (Pseudogene)	-0.2478	-0.23	-0.1368	-0.4932	-0.3298	-0.2359	-0.3423	-0.1568	-0.2307	-0.2999	-0.2	-0.2042	-0.2798	0.1914	0.0224	0.4624	-0.1131	-0.0716	-0.2518	-0.5727	-0.0591	-0.2949	-0.2454	-0.0577	-0.1334	-0.4284	-0.2577	-0.1042	0.1532	-0.188	-0.129	0.4957	-0.1833	-0.2046	0.0004	-0.4086	0.0745	0.0134	-0.1196	-0.0596	-0.1975	0.1531	0.0143	0.2062	1.0064	1.1454	-0.0957	-0.1392
BP0789	acetolactate synthase large subunit	0.0289	0.0454	0.4435	-0.1114	-0.0393	-0.22	-0.1992	0.0123	-0.0717	-0.4111	0.1182	0.0094	-0.0318	0.1893	0.0832	0.0394	0.0465	-0.0385	-0.0911	-0.1251	-0.028	-0.0912	0.3375	0.2427	0.091	0.2639	0.2115	0.3364	-0.0358	-0.2423	0.1775	-0.417	-0.0954	0.1888	0.1444	-0.1269	0.1043	-0.0795	0.0938	0.1674	0.1427	0.1391	0.1385	-0.5615	-0.2524	-0.0271	0.1108	0.2772
BP0790	acetolactate synthase small subunit	-0.0458	-0.0083	-0.1612	-0.0477	-0.0705	-0.0599	-0.0882	0.1547	-0.3108	-0.4982	0.0913	-0.2056	0.2809	-0.0334	0.0623	-0.4831	0.2395	-0.0991	0.1389	-0.0891	-0.0909	-0.0622	-0.1662	0.1998	-0.0424	-0.28	0.115	0.374	-0.1843	-0.2384	-0.114	-0.1507	-0.0369	-0.1163	-0.0816	-0.104	0.0317	0.0308	-0.0889	0.1807	0.176	-0.1961	-0.1245	-0.2174	-0.1002	-0.3658	-0.3008	0.2526
BP0791	ketol-acid reductoisomerase	-0.2419	-0.0147	-0.0346	-0.1599	-0.2573	-0.2094	-0.0696	-0.0692	-0.2749	-0.2963	-0.2305	-0.2242	-0.0683	0.0083	-0.2242	0.4511	-0.2427	-0.2771	-0.1294	-0.8943	-0.1905	-0.6688	-0.8578	-0.1086	-0.2378	-0.5142	-0.146	-0.2136	-0.1646	-0.2408	-0.2528	-0.1004	-0.2173	-0.5423	-0.1981	-0.2214	-0.1923	-0.1995	-0.2815	-0.1898	-0.3191	-0.0913	-0.2401	-0.3009	0.1298	-0.0535	-0.4424	-0.0365
BP0792	putative CDP-diacylglycerol--serine O-phosphatidyltransferase protein	0.148	-0.3889	0.2247	-0.1817	0.2648	-0.372	-0.4848	-0.4101	-0.0881	0.3533	0.1011	0.3775	-0.1064	0.4303	0.226	0.0233	-0.1494	0.3377	0.1119	0.2943	0.2871	0.0496	-0.0582	-0.1001	0.1563	0.2209	0.1186	-0.1864	0.5468	0.1546	0.2683	0.8716	0.4055	0.5832	0.5167	0.1382	0.0339	-0.1645	-0.1035	-0.2161	-0.1187	0.3356	0.3528	0.2125	0.7917	0.9843	0.3206	-0.2811
BP0793	putative lipoprotein	-0.0744	-0.1078	0.2398	-0.2196	-0.0911	0.0004	0.0429	0.2688	0.3747	-0.0879	0.0748	0.0776	0.1094	0.3342	0.0458	0.3414	0.2002	0.2603	0.253	-0.3269	0.3776	-0.1915	-0.0737	0.4661	0.3099	0.2245	0.2594	0.2787	0.5206	0.2842	0.304	0.5107	0.3836	0.04	0.3079	0.094	0.0047	0.195	0.1222	0.375	-0.0396	0.4767	0.4827	0.256	0.5456	0.8216	0.0487	0.3045
BP0794	30S ribosomal protein S15	-0.0554	0.167	-0.1478	0.1744	-0.0005	0.4024	0.3887	0.8723	0.815	0.0243	0.1909	0.376	0.3235	0.5492	0.2266	-0.1691	0.4207	0.2284	0.3363	0.1126	0.4817	0.2426	0.3806	0.6218	0.233	0.1468	0.2097	0.4835	0.4033	0.4251	0.7519	-0.7009	0.3064	0.2836	0.4294	0.2335	0.1844	0.1859	0.1048	0.5392	0.3345	0.168	0.3585	-0.2871	-0.4626	-0.4941	0.3814	0.4583
BP0795	polyribonucleotide nucleotidyltransferase	-0.2624	0.0134	0.1195	0.1084	-0.2629	0.0105	0.0584	0.2233	-0.0476	-0.3478	0.1296	0.183	0.2666	0.0886	0.066	-0.0687	0.1893	-0.1728	-0.0197	-0.4621	0.128	0.0738	0.5885	0.5191	-0.0515	0.1746	0.202	0.2826	0.1823	0.2682	0.427	0.1971	0.0646	-0.1753	0.0565	-0.0052	0.0918	0.0137	0.0316	0.2537	0.2482	0.0505	-0.0265	0.0598	0.2979	0.4123	-0.2253	0.399
BP0796	putative lipoprotein	0.0872	-0.0507	-0.5617	-0.0815	-0.1146	-0.4648	-0.6136	-0.0501	-0.1131	-0.6247	-0.0566	0.2155	0.1108	0.1708	0.2041	-0.079	0.1624	-0.1393	-0.3963	-0.4539	-0.0777	-0.3986	0.0358	0.2235	-0.1006	-0.0977	-0.0109	-0.1884	0.3049	-0.3018	0.3959	0.6247	-0.3635	-0.0426	-0.1269	-0.172	0.1508	-0.2354	-0.4231	-0.0633	-0.3474	0.1576	0.1086	0.1029	0.5861	0.2203	-0.4808	-0.0637
BP0798	threonine dehydratase catabolic	0.2299	-0.4233	-0.687	-0.145	-0.1886	-0.516	-0.7427	-0.1634	-0.3611	-0.4013	0.2165	0.1769	-0.0357	0.0979	0.222	-0.114	0.2207	-0.3946	-0.464	-0.5793	-0.2661	-0.4122	0.2146	0.0683	-0.331	-0.2612	-0.3047	0.0218	-0.0062	-0.5127	0.0176	0.5312	-0.0563	-0.1545	0.1457	-0.3337	-0.375	-0.5234	-0.6287	-0.1232	-0.3822	0.1162	-0.3342	-0.1252	0.8298	0.5712	-0.4093	-0.3603
BP0799	conserved hypothetical protein	-0.306	0.1628	0.2455	-0.1243	-0.1246	-0.5474	-0.6782	-0.4352	-0.2403	0.1735	0.1279	0.1102	0.432	0.4413	0.0989	0.2286	-0.1319	0.2906	0.1348	-0.5458	-0.0177	-0.277	-0.0852	0.3249	0.0452	-0.1886	0.3149	-0.0321	0.1744	0.0832	0.51	-0.4442	0.0328	-0.2094	0.2057	-0.1212	0.0808	0.1508	0.0155	0.2267	-0.346	0.3369	0.1902	-0.295	0.1803	0.3516	0.3348	-0.0219
BP0800	probable zinc-binding dehydrogenase	0.0077	0.0006	0.0455	0.215	0.0537	-0.3455	-0.5276	0.2474	-0.0429	-0.3167	0.1907	0.1683	0.1177	-0.0109	0.0476	0.3396	0.3086	0.1605	0.1011	0.2498	0.0733	0.3298	0.5678	0.4816	0.1879	0.1502	0.1608	0.5554	-0.5602	-0.4086	-0.0521	0.411	0.221	0.1423	-0.0292	0.095	0.1146	0.2742	0.0944	0.5247	0.4584	0.0326	0.3439	0.2643	0.307	0.529	-0.1361	0.6016
BP0801	triosephosphate isomerase	0.0066	-0.1468	0.2916	0.0462	-0.1412	-0.1383	-0.3549	-0.1992	-0.0143	-0.2739	0.0745	0.2212	0.1426	0.3274	0.0352	0.0077	-0.1036	0.1262	0.0358	-0.239	-0.079	-0.4007	-0.4142	0.117	0.0771	0.1408	0.251	-0.064	0.1489	-0.2125	0.1692	-0.0535	-0.0443	0.1181	0.2815	-0.0763	0.0527	0.043	0.0613	0.0308	-0.3194	0.222	0.157	-0.3612	0.2504	0.3152	0.0079	0.0454
BP0802	protein-export membrane protein	-0.0543	0.0125	0.6301	-0.218	0.1944	-0.0413	-0.3081	-0.4312	0.0233	0.3176	-0.0125	0.2617	0.004	0.4661	0.2374	0.0264	-0.1565	0.477	-0.2255	-0.2574	0.1596	-0.3444	-0.5159	0.0477	0.1817	-0.0991	0.2805	-0.2135	0.3526	-0.2567	-0.1021	0.2191	-0.1032	-0.0202	0.3992	-0.1866	0.0819	-0.0128	-0.0166	-0.1966	-0.1672	0.3677	0.314	-0.2965	0.4024	0.9	0.3374	-0.2325
BP0804	high-affinity choline transport protein	0.0187	-0.6016	-0.345	-0.2989	-0.2204	-0.6661	-0.7277	-0.7232	-0.553	-0.2585	0.0546	0.2715	-0.0961	0.1684	0.2654	0.2129	-0.0843	-0.3694	-0.3586	-0.1734	-0.1356	-0.5607	-0.173	0.1252	-0.2951	-0.3615	-0.15	-0.3867	0.0769	-0.4009	-0.4153	0.6973	-0.0618	-0.0799	0.0755	-0.1693	-0.22	-0.4662	-0.2475	-0.3533	-0.2394	0.1518	-0.1298	-0.0332	0.7767	0.6199	-0.4645	-0.4983
BP0805	probable transcriptional regulator	0.1697	-0.0866	-0.0202	-0.3422	-0.1224	-0.2907	-0.6271	-0.2348	-0.0444	-0.36	0.0552	0.223	0.0556	0.3004	0.1596	0.5507	0.0493	0.1338	-0.1036	-0.1555	-0.3268	-0.3658	0.06	0.348	0.1259	-0.006	0.2459	0.0632	0.1069	-0.2348	0.1733	0.1821	0.1343	0.003	0.1686	-0.0261	0.0106	-0.0067	0.0268	0.227	-0.1511	0.2337	0.3548	-0.1238	0.6769	0.6832	0.0629	0.0666
BP0806	methylaspartate ammonia-lyase	-0.0061	0.0155	0.2765	-0.3416	0.02	-0.204	-0.1261	0.0539	0.0013	-0.4419	-0.0444	0.0473	0.0598	0.1415	-0.0062	-0.1617	0.0923	0.2823	0.1041	0.0609	-0.0283	-0.197	0.4057	0.5788	0.4116	0.4333	0.331	0.231	-0.2507	-0.1437	0.1691	0.0877	0.2272	0.4572	0.435	0.0999	0.1149	0.2641	0.4006	0.4165	0.2119	0.1315	0.2288	0.0839	0.375	0.3586	0.3808	0.4246
BP0807	putative exported protein	0.0536	-0.3751	0.2319	0.5891	0.0388	-0.7703	-0.2837	0.5457	0.9238	-0.2661	-0.2332	0.5899	0.0509	0.603	0.1314	0.0404	0.4187	0.2611	-0.0611	-0.417	0.6297	0.3776	0.473	0.4737	0.5931	0.8073	1.0177	0.6376	0.0984	-0.2137	0.48	0.6361	0.0524	-0.3165	1.0241	0.1046	-0.0191	0.2983	0.1021	0.0755	0.395	0.6449	1.1502	-0.0051	0.8507	0.3014	0.3172	0.555
BP0808	conserved hypothetical protein	0.0973	-0.3173	-0.1871	-0.0637	-0.0114	-0.1986	-0.7904	-0.1057	-0.0755	-0.4504	-0.2414	0.0228	-0.2592	0.1507	-0.0056	0.0976	0.061	0.2267	0.0227	-0.4403	0.0584	0.3895	0.2992	0.3857	0.1886	0.3364	0.3799	0.4739	0.0096	-0.7102	-0.3162	0.3097	0.0202	0.0422	0.2922	-0.1704	-0.1569	-0.3583	-0.2156	0.0714	0.1568	0.2561	0.296	-0.2613	0.5889	0.4256	-0.0873	0.0458
BP0809	putative argininosuccinate lyase (Pseudogene)	-0.1517	-0.0633	0.1468	0.1371	0.1367	-0.0717	0.2832	0.1458	-0.1039	-0.59	0.169	-0.1589	0.1091	0.1648	-0.0313	-0.0414	0.269	0.281	0.0148	0.0969	0.0821	0.2244	0.5919	0.4247	0.4332	0.4648	0.6945	0.5806	-0.372	-0.5289	-0.3031	0.2741	0.1302	0.2092	0.145	-0.0361	0.2685	0.498	0.1685	0.473	0.5806	0.1016	0.078	0.3258	0.3163	0.4397	-0.2057	0.5499
BP0810	putative exported protein	-0.0392	0.0585	0.3092	-0.4119	-0.0082	-0.4543	-0.588	-0.272	-0.3207	-0.0495	0.0099	0.012	0.1501	0.1732	0.3006	-0.2071	-0.2435	0.5012	0.0254	-0.489	-0.0796	-0.2755	-0.1824	-0.2322	0.2655	0.1749	0.5893	0.359	-0.0968	-0.7725	-0.7823	0.3725	0.0505	-0.1262	0.3176	-0.3294	-0.0458	0.0525	-0.1	0.1055	0.1783	0.161	0.273	0.0807	0.6171	0.5665	0.0327	-0.5096
BP0813	probable short-chain dehydrogenase	-0.0825	-0.2139	-0.0635	-0.1326	-0.1185	-0.1159	0.0444	0.0047	-0.134	-0.0033	0.2978	0.0217	0.1409	0.2153	-0.0273	-1.1812	0.175	-0.1733	0.1814	-0.3808	-0.044	-0.2661	-0.1882	0.2275	-0.071	-0.0262	0.042	0.0951	-0.0296	-0.1577	0.0302	0.4693	-0.0398	-0.5042	0.2052	-0.0108	-0.0476	-0.0829	-0.2149	0.1182	-0.1452	0.1803	-0.0979	0.1519	0.6137	0.6781	-0.0264	0.3189
BP0814	probable LysR-family transcriptional regulator	-0.3735	-0.2289	-0.4598	-0.2687	-0.4177	-0.4134	-0.9266	-0.1235	-0.4947	-0.7056	-0.3001	-0.3781	-0.283	-0.3588	-0.2374	0.0573	-0.1715	-0.3916	-0.7029	-1.361	-0.5429	-0.1112	-0.0529	0.3455	-0.2226	-0.5545	-0.207	-0.0231	-0.2001	-0.5039	-0.0893	0.7452	-0.4818	-1.3172	-0.519	-0.5283	-0.234	-0.1972	-0.4436	-0.258	-0.0612	-0.2183	-0.2461	-0.1352	1.2125	1.3142	-0.4015	-0.1853
BP0815	cystathionine beta-lyase	-0.1231	-0.3417	0.0419	-0.5097	-0.2364	-0.0358	-0.2373	-0.2796	-0.056	-0.3678	0.0006	0.1418	0.1002	0.2185	0.2158	-0.0879	-0.1093	0.0902	-0.0739	-0.0288	-0.0409	-0.3335	-0.2545	-0.1417	-0.0837	-0.0601	0.1121	-0.0331	-0.0575	-0.3701	0.0398	0.1254	-0.0058	-0.0252	0.2684	-0.1244	0.0015	-0.0469	0.128	-0.0673	0.0088	0.3404	0.3671	-0.0207	0.5677	0.6766	0.1772	0.1989
BP0816	conserved hypothetical protein	-0.0758	-0.0528	0.1956	-0.0862	-0.3946	-0.0757	-0.0637	0.0525	-0.0569	-0.426	0.0219	0.0637	-0.0196	0.0824	-0.1257	0.4603	0.0067	0.1249	-0.2046	-0.0028	0.0479	-0.104	-0.1329	0.2981	-0.0405	-0.3108	0.2943	0.1796	-0.3159	-0.3643	-0.187	0.4304	-0.1245	0.0063	0.0868	-0.1286	0.1424	0.3377	0.043	0.2504	0.0725	0.171	0.0982	0.3617	0.2942	0.3726	0.227	0.117
BP0817	putative exported protein	0.0612	-0.1107	-0.0653	-0.1315	-0.0163	-0.1469	-0.306	-0.2223	-0.4074	-0.5814	0.1641	-0.0877	0.0372	-0.0895	0.1666	0.211	0.2477	-0.3736	-0.0194	0.1185	-0.1902	-0.1358	0.5325	0.4306	-0.096	0.1187	-0.2114	0.3217	-0.6294	-0.3779	0.1039	0.2371	0.1681	0.1687	0.0824	0.1509	0.0485	0.416	-0.2147	0.2131	-0.2158	-0.0624	0.0024	0.4362	0.3988	0.2754	-0.4039	0.4625
BP0818	conserved hypothetical protein	0.2044	-0.1578	0.0645	-0.3134	0.1496	-0.0567	-0.0185	-0.2115	0.1323	-0.6028	-0.0184	0.0958	0.1837	0.173	0.1383	-0.3069	-0.0786	-0.173	-0.2105	0.2459	-0.1522	0.2185	-0.0266	0.6425	-0.0121	-0.0596	-0.0537	-0.3263	-0.0852	-0.6406	0.0235	0.3459	-0.2965	-0.0891	0.2599	-0.1983	0.0574	0.0609	0.0751	0.0155	-0.1676	0.3418	0.1507	0.0603	0.5708	0.5521	-0.0294	0.1451
BP0819	putative exported protein	-0.163	-0.0734	0.0738	-0.3313	0.1128	-0.2763	-0.7464	-0.0668	0.1582	-0.1748	0.1499	0.2672	0.0888	0.268	0.4044	0.1069	0.0394	0.267	0.2595	-0.3623	-0.0301	-0.2416	0.0807	0.3264	0.0232	0.4475	0.2895	0.1536	0.2057	-0.1985	0.0915	0.6142	0.3438	-0.1525	0.6873	0.1222	-0.0941	0.0219	0.2114	0.1143	-0.0858	0.8392	0.5875	-0.1792	0.6291	0.7931	0.1315	-0.0153
BP0820	conserved hypothetical protein	0.1287	-0.0408	-0.1346	-0.4144	0.0533	-0.1959	-0.3005	-0.0396	-0.0927	-0.1165	0.1364	0.1331	0.1758	0.3175	0.3639	0.0771	-0.0307	0.1789	0.1298	-0.0482	-0.0366	-0.2681	0.4341	0.3502	0.0478	-0.0087	0.2233	0.1722	-0.0876	-0.1433	0.0037	0.2947	0.1667	0.1105	0.2865	0.0796	0.2859	0.304	0.3202	0.2818	0.236	0.2021	0.2176	0.2365	0.4133	0.5505	0.25	0.2978
BP0821	hydantoin utilization protein B	-0.0782	-0.1232	-0.0598	-0.008	0.1589	-0.2082	-0.4138	0.642	0.3872	-0.1177	-0.0234	-0.0004	0.2777	0.1771	0.0658	0.05	0.1903	0.1971	0.2351	-0.176	0.1043	0.1218	0.2833	0.6822	0.0225	0.136	0.2942	0.5934	0.0808	0.0526	0.1329	0.392	0.477	-0.2814	0.1465	0.3423	0.0161	0.3277	0.0847	0.6987	0.4053	0.1142	0.3832	0.127	0.6252	0.2274	0.6525	0.7106
BP0822	hydantoin utilization protein A	-0.1473	0.0129	0.6814	-0.044	-0.1557	-0.2719	0.1129	-0.0228	0.2084	-0.1532	-0.0912	0.2644	0.334	0.2826	-0.0674	0.1766	0.2301	0.4006	0.4313	-0.5112	0.0937	-0.0365	-0.0255	0.7542	0.1077	0.2833	0.5573	0.2317	-0.1472	0.0085	0.2305	0.8063	0.3846	0.1703	0.2303	0.0748	0.4051	0.4202	0.5382	0.4632	0.0068	0.2615	0.2098	0.4341	0.6032	0.3212	-0.0017	0.5183
BP0823	putative transcriptional regulator	-0.1326	-0.003	0.1931	-0.2631	-0.1171	-0.3673	-0.1494	-0.2068	-0.155	-0.2799	0.123	-0.0113	0.1528	-0.2039	-0.176	-0.6138	-0.1472	0.1749	0.0085	-0.0256	-0.3104	-0.1227	0.1259	0.5634	-0.0735	-0.012	0.1272	0.4396	-0.2531	-0.1702	-0.0976	0.349	0.1892	0.0318	0.2768	-0.0693	0.0015	0.131	0.1276	-0.0758	0.0248	-0.1968	0.1335	0.1624	0.4203	0.7396	-0.0193	0.4712
BP0824	azurin	-1.9282	-1.8919	-1.7931	-2.1394	-1.9057	-2.4452	-2.6561	-1.119	-1.028	-1.6885	-1.3655	-1.189	-0.926	-1.7342	-0.9646	-0.5209	-1.006	-1.8222	-2.5725	-1.9562	-1.8321	-1.6114	-0.2497	-0.4348	-2.2954	-2.2642	-0.823	-0.9295	-1.2954	-0.8014	-0.2654	1.301	-1.7308	-1.8419	-1.9107	-1.4542	-1.9828	-2.2267	-2.0662	-2.148	-1.6144	-1.3859	-1.5477	1.3772	0.9792	2.1387	-2.0995	-2.0617
BP0825	conserved hypothetical protein	-0.1213	0.2296	0.2949	0.1275	-0.3567	-0.4457	-0.4241	0.028	0.434	-0.2757	-0.0688	-0.0943	-0.0237	0.1739	-0.3428	-1.1298	-0.0513	0.4471	0.0011	-0.545	0.1118	0	0.1905	0.3426	0.0752	-0.0192	0.5094	0.303	0.1674	-0.0048	0.197	0.4482	0.0603	-0.211	0.0266	-0.1238	0.0327	0.0872	0.0874	0.397	0.4185	-0.0278	0.59	0.3029	0.4831	0.5325	0.074	0.2387
BP0826	outer membrane component of multidrug efflux system	0.0101	-0.0952	-0.3408	0.6238	-0.1094	-0.58	-0.5314	0.7846	0.2234	-1.2948	-0.1561	0.1994	0.0866	0.1413	0.087	0.4857	0.7237	0.0764	-0.2407	-1.6001	0.2008	-0.119	0.4595	0.9391	0.0959	0.0004	0.5896	0.7731	0.1341	-0.4293	0.5093	0.265	-0.1787	-1.1835	-0.1066	-0.1877	-0.0608	-0.1525	0.1124	0.8509	-0.0552	-0.0231	0.4932	0.1736	-0.0158	-0.3013	-0.5461	0.7966
BP0827	integral membrane component of multidrug efflux system	0.2287	-0.3686	-0.6681	-0.3973	0.0718	-0.0842	-0.4735	-0.4501	-0.502	-0.9382	0.291	-0.136	0.2255	0.0816	0.6082	-0.2403	0.5845	-1.129	-0.1367	0.0632	-0.3332	-0.3888	0.1344	0.4572	-0.1516	-0.4174	0.0003	-0.1831	-0.4167	-0.6258	0.1576	0.177	-0.567	0.3083	-0.0802	-0.2439	0.0086	-0.2134	-0.7169	-0.056	-0.6548	0.0247	-0.5549	-0.2207	0.3474	0.1301	-0.9273	-0.2498
BP0828	probable HlyD-family secretion protein	0.0827	-0.9005	-1.1908	-0.386	0.1373	-1.1221	-0.69	-0.2975	-0.4775	-0.4557	0.4355	0.9462	-0.064	0.1408	1.0865	-0.0284	0.0169	-0.3738	-0.3936	-0.6143	-0.5951	-0.8814	-0.4209	0.3479	-0.1312	-0.1959	-0.7675	0.3165	0.3562	-0.5471	0.04	0.2505	0.1414	0.0485	0.7079	-0.3482	-1.0244	-0.6577	-0.1569	-0.3445	-0.4102	0.4963	-0.4994	-0.3338	1.2417	0.6674	0.0823	-0.1785
BP0829	putative transcriptional regulator	-0.1312	0.132	0.4812	-0.0757	0.1346	-0.0869	-0.1311	-0.1106	0.1256	-0.1812	-0.1333	0.178	-0.1039	0.1874	-0.1659	0.2616	-0.0897	0.1284	-0.1024	-0.1127	-0.0114	0.1075	-0.1414	0.3145	0.1613	-0.1095	-0.0048	0.0407	0.1417	-0.1942	0.1648	0.4962	-0.0605	0.0458	0.3851	-0.2622	0.0544	0.0421	-0.079	0.0791	0.0225	0.0222	0.0728	0.0631	0.6029	0.696	0.1233	0.1175
BP0831	high-affinity choline transport protein	0.2255	-0.1095	0.3324	-0.2977	0.1172	0.2461	0.0067	-0.3081	-0.0583	0.1057	0.3588	0.2759	0.1445	0.2842	0.3143	0.6682	-0.076	0.0114	-0.1995	0.1187	-0.0727	-0.4289	-0.4621	-0.2124	-0.1931	-0.4007	-0.18	-0.2539	0.3292	0.0984	0.2151	0.6759	0.1129	0.3721	0.2904	0.05	-0.0711	0.1444	0.0014	-0.1446	-0.4408	0.2595	-0.2459	0.4092	0.6277	0.8073	0.0461	-0.0555
BP0832	LysR-family transcriptional regulator	0.2272	0.064	0.5953	-0.5281	0.0267	0.0602	0.2157	-0.2844	-0.0633	-0.4411	0.1478	0.2466	0.1981	0.2012	-0.0666	-0.5516	-0.024	0.1597	-0.0753	0.1296	0.0214	-0.0254	0.1711	0.077	0.1806	0.3539	0.226	0.021	-0.0853	-0.1472	0.2613	0.4032	0.1277	0.4685	0.6376	0.0691	0.2068	0.1929	0.1242	0.0003	-0.1384	0.2601	0.1412	0.1659	0.4791	0.7301	0.1279	0.0153
BP0833	conserved hypothetical protein (Pseudogene)	-0.4593	-0.1244	0.4113	-0.5392	0.0606	-0.0739	-0.4664	-0.5497	-0.1649	0.0161	-0.1558	-0.002	-0.3046	-0.0336	-0.3122	-0.3397	-0.7496	0.0453	-0.4076	-0.8216	-0.2378	-0.8241	-0.8182	-0.4539	-0.2745	-0.5389	-0.4182	-0.5776	0.2046	-0.1663	-0.2165	1.1088	-0.283	-0.4809	0.1618	-0.581	-0.2226	-0.2995	-0.3849	-0.6715	-0.6501	-0.1474	0.013	0.1502	0.9436	1.2271	0.061	-0.4308
BP0834	probable DNA repair exonuclease	0.1524	-0.5739	-0.556	-0.5953	0.1506	-0.6569	-0.772	-0.5617	-0.3075	-0.5729	-0.4797	0.0241	-0.1407	0.1548	-0.1096	-0.0747	-0.1286	-0.3612	-0.4028	-0.8503	-0.2395	-0.3796	-0.4194	0.1744	-0.2432	-0.4398	-0.2503	-0.4194	0.0711	-0.2505	0.0141	0.4415	-0.0444	-0.3612	0.0877	-0.0001	-0.2499	-0.3329	-0.3872	-0.1598	-0.4546	0.208	0.0051	-0.0987	0.4446	0.6236	-0.4432	-0.3341
BP0835	putative membrane protein	0.1111	-0.4601	-0.8931	-0.753	-0.31	-0.9331	-1.3439	-0.5257	-0.3234	-0.799	-0.2711	0.1402	-0.4998	0.0945	0.263	1.2411	0.2684	-0.1636	-0.3561	-0.5452	-0.5932	-0.683	0.3867	0.3836	-0.1166	-0.137	0.3555	-0.1327	-0.1107	-1.1315	-0.8027	-0.0336	-0.1323	-0.0183	0.2501	-0.132	-0.2071	-0.2573	-0.2511	-0.2036	-0.6937	0.4298	-0.2646	-0.7044	0.6003	0.078	-0.0526	-0.1181
BP0836	putative exported protein	0.1939	0.2764	0.4707	-0.5722	0.2148	0.1505	0.1506	-0.2739	-0.2059	-0.6193	0.9917	0.1684	0.4752	0.0838	0.3163	0.1266	0.0455	0.1645	0.1847	0.6342	-0.1043	0.2458	0.2063	0.2126	0.2527	0.4972	0.2494	0.0271	-0.1783	-0.161	0.7842	0.3558	-0.0541	0.7233	0.6588	0.0623	0.0148	0.3928	0.2885	0.0867	0.167	0.229	-0.1071	0.5115	0.5965	0.7313	0.3056	0.2646
BP0837	conserved hypothetical protein	0.0589	0.0847	0.0774	0.0004	-0.0247	-0.6632	-0.3742	-0.1353	-0.1438	-0.1515	-0.0151	0.0479	0.0191	0.3235	0.4713	0.5427	-0.1435	-0.0107	-0.2378	-0.3212	0.1362	-0.0892	0.0632	0.4639	0.0963	0.355	0.4802	0.1924	0.0059	-0.0838	0.1799	0.7093	0.0882	-0.0593	0.2183	0.2445	0.1946	-0.036	-0.1451	0.3289	-0.3183	0.1652	0.6589	0.3187	0.7766	0.7595	0.0406	0.134
BP0838	probable TetR-family transcriptional regulator (Pseudogene)	0.4985	-0.4672	-0.1917	-0.1091	0.2215	-0.395	-0.592	-0.1094	0.0158	-0.2103	0.4841	0.4176	0.0686	0.3608	0.6718	-0.2898	0.3782	0.178	0.2902	0.3975	0.1796	0.2608	0.4362	0.4575	-0.0243	-0.0615	-0.0158	0.3414	0.0935	-0.0487	0.2696	0.5945	0.5614	0.5092	0.428	0.5269	0.0657	-0.1033	-0.1164	0.2642	-0.0753	0.4995	0.5594	0.0277	0.9476	0.9557	0.2051	0.369
BP0840	outer membrane porin protein precursor	-0.4684	0.0376	-0.4174	-0.6466	-0.2289	0.2224	0.2342	-0.5069	-0.4089	-0.7357	-0.501	-0.5482	-0.3334	-0.4343	-0.8749	0.7104	-0.8982	-0.5058	-0.6646	-0.1111	-0.6122	0.2435	0.1519	-0.4524	0.2143	0.5627	-0.0352	-0.4146	-0.4285	-0.3805	-0.5896	0.1574	-0.2098	-0.409	-0.1322	-0.6828	-0.1544	-0.0212	0.1666	-0.4183	0.2003	-0.1803	-0.6144	-0.1122	-0.0698	-0.1694	0.3342	-0.4511
BP0841	probable NADH-ubiquinone oxidoreductase chain 3	-0.1137	-0.0925	-0.1381	-0.0523	0.076	-0.1579	-0.1441	0.5077	0.1941	-0.186	0.0786	0.2665	0.1857	0.3626	0.2628	0.3005	0.3648	0.3722	0.3933	0.7363	0.3304	0.1282	0.4414	0.6494	0.2411	0.1829	0.4398	0.6124	0.0938	0.105	-0.1201	-0.443	0.547	0.6246	0.3874	0.4187	0.3113	0.3518	0.2394	0.4992	0.2282	0.2165	0.3463	-0.0396	-0.348	-0.4441	-0.0144	0.5203
BP0842	NADH-ubiquinone oxidoreductase, 20 kDa subunit	-0.3451	-0.0546	-0.2352	-0.0557	-0.0147	0.0678	0.0119	0.335	0.4413	-0.2325	0.055	0.1459	-0.0239	0.2533	0.3508	0.2339	0.2874	0.1712	0.2267	0.1994	0.1552	0.3399	0.6106	0.5441	0.196	0.3665	0.2255	0.3751	0.1812	-0.0043	0.0123	0.0061	0.3796	0.2399	0.4564	0.195	0.235	0.1682	0.0509	0.4538	0.3912	0.2155	0.3511	0.033	0.2054	0.1741	0.1292	0.4076
BP0843	respiratory-chain NADH dehydrogenase, 30 kDa subunit	-0.2692	-0.1958	-0.2057	-0.3348	-0.2458	-0.368	-0.2526	-0.0724	-0.0196	-0.1548	-0.1351	0.0642	0.2651	0.3511	0.0318	0.0619	0.1166	0.1313	0.1405	0.0556	0.1021	-0.3063	-0.3155	0.3407	0.0116	0.0191	0.4972	0.1881	0.0421	-0.0868	-0.1468	0.2459	0.2365	0.0283	0.2821	0.1516	0.1967	0.2868	0.0478	0.1263	0.062	0.3599	0.1219	0.0466	0.4453	0.2999	-0.1164	0.232
BP0844	respiratory-chain NADH dehydrogenase, 49 kDa subunit	-0.227	-0.2369	-0.4615	-0.036	-0.357	-0.1615	-0.3047	0.3556	-0.0192	-0.4502	-0.0138	-0.0981	0.1428	0.1575	0.1924	-0.2031	0.3032	-0.0136	0.161	-0.0126	0.0106	0.0063	0.2381	0.6254	0.1047	0.1028	0.2478	0.5958	-0.0877	-0.1051	0.1588	0.2152	0.1851	-0.0217	0.0459	0.1556	0.0967	0.0961	0.0895	0.5189	0.0643	0.1292	0.1753	0.1765	0.2825	0.1313	-0.1491	0.6109
BP0845	respiratory-chain NADH dehydrogenase I, 24 kDa subunit	-0.5592	-0.1433	-0.3004	-0.1067	-0.249	-0.0779	-0.2407	0.2278	-0.0519	-0.1627	-0.2385	-0.1556	0.0381	0.2269	0.1102	0.27	0.2176	0.1859	-0.0275	-0.3423	0.0412	0.1003	0.2064	0.3696	-0.0226	-0.1437	0.1385	0.2893	-0.1431	-0.1811	-0.1712	0.2596	0.1302	-0.1514	0.0673	-0.0561	0.1375	0.2669	0.0488	0.3621	0.1668	0.1008	0.14	0.3034	0.1713	0.3599	-0.1967	0.2456
BP0846	respiratory-chain NADH dehydrogenase, 51 kDa subunit	-0.2802	-0.1474	-0.1117	-0.4184	-0.3195	-0.4324	-0.2257	-0.0027	-0.0675	-0.6163	-0.1945	-0.0395	-0.0515	0.0699	0.1474	0.2091	-0.0165	-0.0084	-0.066	0.1106	-0.0839	-0.2059	-0.1633	0.3052	-0.0698	-0.1146	0.0348	0.1047	-0.0667	-0.0917	-0.19	0.4027	0.0873	0.4753	0.0991	-0.0521	-0.0211	0.124	0.1012	0.1981	-0.1217	0.0657	0.0091	0.1738	0.4133	0.6111	-0.3698	0.2493
BP0847	NADH-ubiquinone oxidoreductase, 75 kDa subunit	-0.1335	-0.0798	-0.3127	-0.3428	-0.2785	-0.018	-0.1244	0.1631	0.0082	-0.3588	0.047	-0.0857	-0.0247	0.1871	0.1286	0.6865	0.1732	-0.2048	-0.0001	0.0729	0.0237	-0.0556	0.1131	0.5262	0.0803	0.1359	0.1744	0.2117	0.0259	-0.0636	0.1828	0.3085	0.2941	0.1374	0.1896	0.1882	0.0727	-0.0173	-0.0946	0.32	0.0744	0.2755	0.2382	0.2325	0.4606	0.2941	0.3225	0.3519
BP0848	NADH-ubiquinone oxidoreductase, chain H	-0.3602	-0.1804	0.0263	-0.338	-0.1138	-0.0472	0.0006	0.0694	-0.0054	-0.12	0.1215	0.1725	0.1379	0.262	0.2528	0.3947	0.1014	0.2544	0.1161	0.8158	0.105	-0.1061	-0.1663	0.3364	0.0444	0.1366	0.1409	0.1799	0.0373	-0.1117	-0.0525	0.4873	0.1753	0.6918	0.3576	0.2053	0.1324	0.1555	0.2661	0.2637	0.0118	0.3587	0.1976	0.1983	0.5626	0.7484	0.1508	0.2559
BP0849	NADH-ubiquinone oxidoreductase, chain I	-0.1787	-0.1426	-0.0876	-0.4993	-0.227	-0.0898	-0.3061	-0.1798	-0.1777	-0.1955	0.0975	0.0065	0.0999	0.1863	0.0853	0.4337	-0.1388	-0.0061	0.2331	0.4212	0.0298	-0.3874	-0.3493	0.2038	-0.0377	-0.2025	0.2128	0.1554	-0.0159	0.0378	0.0345	0.2333	0.2094	0.4069	0.1759	0.1854	0.1101	0.2783	0.0806	0.0879	-0.0863	0.2545	0.0412	0.3544	0.4057	0.3579	0.1125	0.2369
BP0850	NADH-ubiquinone oxidoreductase, chain J	-0.2918	-0.3084	-0.3269	-0.2224	-0.1946	-0.2274	-0.412	0.1625	0.1484	-0.4678	-0.0233	-0.0531	-0.1758	0.1962	0.167	0.5656	0.1473	-0.0453	0.1223	0.3234	0.2309	0.133	0.3682	0.4158	0.062	0.024	0.0661	0.2935	-0.1948	-0.2363	-0.1774	0.2576	0.1753	0.3575	0.2165	0.114	0.0141	0.237	0.1156	0.296	0.2578	0.2922	0.1338	0.2799	0.272	0.3602	0.0331	0.4796
BP0851	NADH-ubiquinone oxidoreductase, chain K	-0.1792	-0.2511	-0.3715	-0.1493	-0.1489	-0.0247	-0.1581	0.2414	0.0758	-0.3074	-0.047	0.0011	0.0161	0.1223	0.1751	0.6963	0.2283	0.0634	0.1547	0.6424	0.0173	0.2405	0.5682	0.4165	0.0165	0.0695	0.0869	0.4024	-0.1779	-0.1899	0.0143	0.2804	0.2433	0.4911	0.1862	0.1776	0.0498	0.1037	0.1353	0.4954	0.2803	0.0975	0.0987	0.1862	0.3944	0.2408	0.1051	0.4852
BP0852	NADH-ubiquinone oxidoreductase, chain L	-0.3483	-0.3277	-0.261	0.1169	-0.052	-0.0012	-0.2351	0.3847	0.1996	-0.2288	0.0665	0.0709	0.01	0.236	0.1341	0.4715	0.5	0.0932	0.2405	0.6586	0.0945	0.3562	0.8221	0.6019	0.1171	0.491	0.3048	0.4717	-0.1323	-0.303	0.153	0.6205	0.4853	0.4489	0.3239	0.2432	-0.0044	0.2692	0.325	0.5291	0.2848	0.1505	0.1989	0.2806	0.4879	0.4568	0.0801	0.6011
BP0853	NADH-ubiquinone oxidoreductase, chain M	-0.0918	-0.2219	0.2616	-0.5868	-0.1415	-0.2616	-0.1744	-0.4301	-0.1401	0.022	0.0129	0.0587	-0.0603	0.3546	0.1909	0.4385	-0.3105	0.1258	0.0021	0.3958	-0.0351	-0.3364	-0.4034	-0.0739	0.0874	-0.0709	0.024	-0.2758	-0.0875	-0.2684	-0.1915	0.4041	-0.0401	0.4559	0.2346	-0.0724	0.1418	0.2118	0.0234	-0.1777	-0.2034	0.2404	0.0464	0.1243	0.5686	0.7068	0.1759	-0.1156
BP0854	NADH-ubiquinone oxidoreductase, chain N	-0.2912	-0.2889	-0.0763	-0.3093	-0.1902	-0.1602	-0.3887	-0.0388	-0.1008	-0.2091	-0.0247	0.0775	-0.0593	0.1367	0.1503	0.608	0.1001	0.1414	0.0338	0.3742	0.0295	-0.1193	0.042	0.1417	0.0046	0.1177	0.1965	0.13	-0.1449	-0.2048	-0.0428	0.4279	0.1731	0.4959	0.2323	0.0435	-0.0057	0.0959	0.1623	0.2164	0.0379	0.1704	-0.0419	0.1361	0.4643	0.5921	0.0842	0.1834
BP0855	putative membrane protein	0.0016	-0.2659	0.4038	-0.6519	-0.0909	0.4845	0.0379	-0.2351	0.5812	-0.0479	-0.16	0.2487	0.0138	0.3876	0.3282	0.0752	-0.2742	0.1288	0.0616	0.4423	0.5367	-0.1484	-0.3666	-0.2173	0.1855	0.1677	0.247	-0.3588	0.0198	-0.5636	-0.2747	0.3447	-0.0087	0.5077	0.2926	-0.069	0.4028	0.0809	0.2393	-0.2976	-0.1178	0.5144	0.4468	0.2183	0.5526	1.0191	0.1703	-0.4039
BP0856	probable TonB-dependent receptor for iron transport	-0.8689	-0.4421	-0.307	-0.1673	-0.4335	0.2063	0.3775	0.8342	0.8594	-0.5147	-0.1981	0.0773	0.0066	0.3822	-0.0263	-0.6066	0.0844	0.0806	-0.032	-0.0381	0.2315	-0.0989	0.2132	0.3879	-0.082	0.1819	0.0648	0.1807	-0.1012	-0.1757	-0.1896	0.2164	0.2319	0.2428	0.3654	0.1055	-0.0522	0.0717	0.1062	0.4848	0.057	0.492	0.253	0.0187	0.1986	0.1601	-0.033	0.5755
BP0857	probable TonB-dependent receptor for iron transport	-0.073	-0.3434	-0.4673	-0.2723	-0.3464	-0.1347	0.2091	0.3105	0.0903	-0.5799	-0.1666	-0.0838	-0.0451	0.0471	0.1096	0.2107	0.1377	-0.2816	-0.2973	-1.1726	-0.0001	-0.0868	-0.0852	0.217	-0.5045	-0.565	-0.405	0.1034	-0.0936	-0.8612	-0.54	0.0493	-0.1849	-0.5883	-0.0378	-0.2085	-0.033	-0.1493	-0.2367	0.3078	-0.1572	0.1805	-0.1127	-0.1726	0.3435	0.0535	-0.2783	-0.0193
BP0858	probable GnaT-family acetyltransferase	0.1104	-0.068	0.3025	-0.292	-0.0807	-0.1938	-0.1386	-0.3017	-0.2069	-0.2966	0.1751	0.0303	-0.1806	0.1057	-0.0395	0.2641	-0.0746	0.2911	0.014	-0.1531	-0.061	-0.159	-0.0103	0.1511	-0.046	0.0512	-0.0133	-0.0469	0.2187	0.0504	0.1763	0.5381	0.0372	0.0813	0.2687	-0.1125	0.0798	0.122	-0.2182	-0.0803	-0.2801	0.351	0.0964	0.2399	0.6955	0.5546	-0.0372	-0.0072
BP0859	short-chain dehydrogenase	0.0209	-0.6938	-0.6317	-0.5359	-0.4985	-0.8567	-0.7819	-0.4864	0.0791	-0.4363	0.1708	0.0441	-0.0581	0.189	0.6488	0.3633	0.0841	-0.6338	-0.2805	-0.6667	-0.1211	-0.5773	-0.1791	0.2118	-0.0899	-0.3198	-0.4802	-0.4749	0.0966	-0.4877	-0.0648	0.181	-0.1868	0.3398	0.3074	0.0544	-0.6628	-0.4833	-0.3917	-0.4854	-0.5418	0.398	-0.1474	-0.4725	0.6652	1.1988	-0.287	-0.4137
BP0860	putative acetolactate synthase large subunit	-0.1264	-0.5859	0.2205	-0.4913	-0.021	-0.1256	-0.022	0.1057	-0.1798	-0.4066	0.3125	0.0453	0.3373	-0.1608	-0.0329	-0.0657	-0.0745	-0.0801	-0.1988	-0.0028	-0.4307	-0.491	0.3608	0.0993	-0.0292	-0.0421	0.1968	-0.0046	-0.5817	-0.4698	0.0609	0.2604	-0.0597	0.2074	0.1309	0.0975	-0.046	0.0368	0.0934	0.0928	0.0645	0.1538	-0.2958	0.2605	0.4287	0.4001	-0.3015	0.2712
BP0861	putative exported protein	0.1435	-0.7284	-0.3717	-0.5034	0.0334	-0.1259	-0.691	-0.6587	-0.5204	-0.3304	0.1855	0.3323	-0.1989	0.0317	0.4079	-1.0491	-0.213	-0.3335	-0.2117	-0.6071	-0.4176	-0.4462	-0.1255	-0.0216	-0.3218	-0.6543	-0.2486	-0.6011	0.1633	-0.7055	0.0105	0.2649	-0.0101	-0.0546	-0.1783	-0.1423	-0.0402	-0.3731	-0.3998	-0.5315	-0.8434	0.2623	-0.484	-0.2653	0.9708	0.5241	-0.4006	-0.3595
BP0862	probable LysR-family transcriptional regulator	-1.0039	-0.7904	-0.374	-1.3404	-0.7691	-0.6895	-0.7647	-1.0324	-0.9764	-1.0151	-0.8789	-1.0193	-0.8451	-0.6204	-1.1173	-0.133	-1.2759	-0.8065	-1.0112	-0.9697	-1.0519	-1.3498	-1.3811	-0.8094	-0.9432	-0.9633	-0.8296	-0.9712	-0.6981	-0.6318	-0.5009	-0.4444	-0.7401	-1.133	-0.7225	-1.2483	-0.7416	-0.884	-0.9588	-1.0782	-1.2212	-0.6894	-0.8184	-0.9639	-0.4273	-0.3838	-1.009	-0.9189
BP0863	phosphoserine phosphatase	-0.2009	-0.0036	-0.0412	-0.1155	-0.1179	-0.3472	-0.4183	-0.0769	-0.2432	-0.3093	0.0488	-0.0673	0.2397	0.1084	-0.0634	-0.233	0.1548	-0.0326	-0.166	-0.2717	-0.1988	-0.1337	0.5168	0.5048	-0.1302	-0.0099	0.159	0.2517	-0.2793	-0.3997	-0.0777	0.1647	0.1297	-0.1661	0.093	0.0974	0.0766	0.1506	-0.1317	0.3507	0.034	0.0693	-0.1153	0.3201	0.1443	0.2418	-0.1771	0.434
BP0864	transcription-repair coupling factor	-0.0265	-0.0965	-0.0564	0.2611	0.0561	-0.4213	-0.2237	0.1936	-0.1651	-0.6888	0.0297	0.1451	0.1741	0.0859	0.0368	0.296	0.2975	0.036	-0.027	-0.4966	-0.0562	-0.0333	0.3149	0.6498	0.0811	0.0872	0.1785	0.5875	-0.1674	-0.3312	0.0233	0.1461	-0.0064	-0.274	0.2281	-0.0299	-0.0482	0.1602	0.171	0.5493	0.0605	0.0201	-0.0903	0.21	0.2027	0.181	-0.5023	0.5696
BP0865	4-diphosphocytidyl-2c-methyl-D-erythritol synthase	-0.108	0.0799	0.014	0.0256	0.0339	-0.5154	-0.5849	-0.0125	-0.2535	-0.7171	0.2095	0.1528	-0.1033	0.0542	-0.0294	-0.1552	0.133	0.0937	-0.2397	0.0923	-0.1758	0.1276	0.9159	0.3749	-0.138	0.2672	-0.1087	0.2525	-0.131	-0.1959	0.3188	0.2395	-0.1865	0.2416	0.162	-0.3364	-0.1556	0.0296	-0.0371	0.2006	0.1878	0.0905	-0.0777	0.0441	0.3825	0.4171	-0.3376	0.3992
BP0866	2C-methyl-D-erythritol 2,4-cyclodiphosphate synthase	-0.0894	-0.0099	0.09	0.2053	0.2024	-0.5932	-0.5732	-0.1362	-0.405	-0.6192	0.1483	0.2147	0.1363	-0.0525	-0.0897	-0.0399	0.0804	-0.007	-0.4628	-0.3764	-0.1681	-0.2825	-0.1563	0.4153	-0.1173	-0.1844	-0.3198	0.2322	0.0247	0.0297	0.0527	0.2976	-0.2788	0.0113	0.0838	-0.3732	-0.0918	0.1027	-0.0466	0.3221	-0.2543	0.1528	-0.1052	0.2043	0.4374	0.3601	-0.6381	0.3858
BP0868	fructose-1,6-bisphosphatase	-0.3053	-0.2844	-0.2041	-0.3261	-0.2426	-0.4396	-0.5684	-0.3508	-0.2233	-0.0903	-0.0052	-0.0634	0.0381	-0.0833	-0.1186	0.2352	-0.2328	-0.1785	-0.2072	-0.4482	-0.296	-0.298	-0.2116	-0.0735	-0.3595	-0.1551	-0.1693	0.0234	-0.0889	0.0735	0.0227	0.0708	0.1395	-0.0071	0.0485	-0.0895	-0.1486	0.0907	-0.1444	0.0818	-0.2409	0.0306	-0.0657	0.1184	0.0747	0.2838	-0.1151	0.2365
BP0869	aminopeptidase N	-0.2325	-0.4162	-0.1981	-0.2059	0.1109	-0.4501	-0.459	0.0485	0.0282	-0.35	0.1384	0.205	-0.0106	0.2888	0.0938	0.1547	0.1443	0.0859	0.1313	0.1645	-0.0698	-0.112	0.2452	0.3036	-0.0004	0.0077	0.1971	0.2511	0.196	0.1535	0.3036	0.2698	0.3878	0.2395	0.3046	0.1441	-0.0941	0.1304	0.2463	0.456	0.1124	0.4338	0.2408	0.184	0.5518	0.4081	-0.0664	0.442
BP0870	putative exported protein	-0.0199	-0.2451	-0.2504	-0.3042	-0.1244	-0.7311	-0.8183	-0.7127	-0.6524	-0.7682	-0.0297	-0.0523	-0.2215	-0.1139	-0.0948	-0.1829	-0.1132	-0.0772	-0.3382	0.0697	-0.6181	-0.5952	-0.0919	0.0041	-0.0566	-0.0693	-0.0488	0.0029	-0.5611	-0.9657	-0.5628	0.8316	0.0864	0.3539	0.1116	-0.2261	0.0535	0.1369	-0.0626	0.1782	-0.444	0.1267	-0.3774	0.4131	1.1613	1.081	-0.0961	0.1003
BP0872	ABC transporter, ATP-binding protein	-0.2972	-0.2777	-0.1635	-0.3003	-0.0751	-0.1717	-0.0625	0.284	0.4976	-0.1628	-0.022	0.2195	-0.122	0.2062	-0.115	0.2699	-0.2264	0.1471	-0.1338	-0.2449	0.0078	-0.5044	-0.071	-0.1446	-0.06	-0.0921	0.1271	-0.0933	0.2574	0.0142	-0.0313	0.6538	0.3072	-0.0006	0.2515	-0.3651	-0.1817	-0.1631	-0.1959	-0.007	-0.2559	0.1287	0.2847	-0.0322	0.6416	0.712	-0.0421	0.0876
BP0873	thiopurine S-methyltransferase	0.2048	0.0625	0.0647	-0.0326	0.0912	-0.1575	-0.2072	-0.2039	-0.0913	-0.2297	0.1378	0.2235	0.2252	0.3027	-0.0575	0.5547	-0.0268	0.2609	0.1225	-0.031	-0.1574	-0.2194	-0.0434	0.2995	0.1204	0.1101	0.232	0.1647	0.2858	-0.0903	0.3129	0.4461	0.2511	0.226	0.2772	-0.0428	-0.0331	0.1493	0.0496	0.1872	-0.1012	0.2395	0.2336	0.2203	0.607	0.6003	0.1577	0.2634
BP0874	vir-repressed protein	0.2397	0.123	0.8276	-0.3799	-0.0738	-0.2353	-0.4955	-0.5049	-0.0898	-0.5649	0.1662	0.141	0.0726	0.193	0.0103	-0.8525	-0.0647	0.1993	-0.2914	0.0722	-0.0236	-0.0939	-0.1903	0.1061	0.0911	0.5519	0.2948	0.0818	-0.2039	-0.4607	0.1013	0.2025	-0.2664	0.1792	0.272	-0.2138	-0.1254	0.0417	0.0397	0.054	-0.0495	0.4017	0.1315	0.0181	0.4771	0.8398	0.1419	0.068
BP0875	putative exported protein	-0.4652	-0.7376	-0.8256	0.192	-0.3795	-0.8827	-0.9096	0.3005	-0.1055	-1.1789	-0.509	-0.4543	-0.6525	-0.2796	-0.3403	-0.4061	0.0674	-0.5308	-0.6645	-1.2949	-0.4737	-0.1614	0.3159	0.5373	-0.2512	-0.3473	-0.3364	0.0832	-0.5013	-0.8139	-0.3892	0.8769	-0.6433	-0.9361	-0.1423	-0.6496	-0.3658	-0.2425	-0.3172	0.2626	-0.1053	-0.4927	-0.2245	0.1505	0.84	0.8384	-1.0012	0.2302
BP0876	putative lipoprotein	-0.0804	-0.0737	-0.0923	-0.0125	-0.151	-0.3259	-0.2897	-0.0396	-0.2549	-0.1392	0.0218	-0.0989	0.0506	0.04	-0.1359	-0.6442	0.0115	-0.0809	-0.1632	-0.4405	-0.0781	-0.2299	-0.1809	0.1527	-0.1019	-0.2386	-0.0056	0.1182	-0.3235	-0.6875	-0.2787	0.1712	0.0102	-0.4781	-0.117	-0.1655	0.026	0.0723	-0.154	0.1925	-0.108	0.146	0.0159	0.1447	0.1756	0.1885	0.0303	0.3153
BP0877	conserved hypothetical protein	-0.0013	-0.2345	-0.194	-0.1845	-0.2428	-0.8321	-1.1658	-0.7972	-0.7114	-0.3608	-0.0877	-0.0302	-0.546	-0.0238	-0.2695	-0.4102	-0.4465	-0.4328	-0.4257	-0.8219	-0.2194	-0.6597	-0.431	-0.1672	-0.2788	-0.1532	-0.3555	-0.2361	-0.2887	-0.5093	-0.4521	0.2546	-0.4578	-0.7452	-0.2618	-0.406	-0.3748	-0.4712	-0.5901	-0.2554	-0.9008	-0.1081	-0.3794	-0.3738	0.5107	0.3144	-0.5071	-0.3229
BP0878	putative phospholipase	-0.1904	-0.2546	-0.5568	-0.0976	-0.31	-0.1122	-0.2271	0.3406	0.4393	-0.4544	0.0445	-0.0716	0.0004	0.3028	0.0992	-0.6264	0.1453	0.0969	0.2303	-0.6168	0.3104	0.0404	0.0372	0.6183	0.1734	-0.049	0.2556	0.4327	0.6201	0.9155	0.7223	0.6514	0.4822	-0.2856	0.1213	0.2191	-0.1321	0.0645	0.0132	0.3876	0.1101	0.4462	0.2276	0.0807	0.4517	0.1709	0.0437	0.2692
BP0879	probable aldehyde dehydrogenase (Pseudogene)	-0.2509	-0.3663	-0.5897	-0.621	-0.6682	-0.7033	-0.9588	-0.4559	-0.309	-0.4413	-0.5075	-0.0075	-0.1625	0.0103	0.1241	-0.0466	-0.4379	-0.5582	-0.5906	-0.9487	-0.461	-0.3255	-0.4853	0.0257	-0.1972	-0.5156	-0.6457	-0.2548	0.1388	-0.4305	0.011	0.282	-0.4786	-0.6634	0.2985	-0.0041	-0.5214	-0.3795	-1.0733	-0.6248	-0.214	0.1618	-0.2797	-0.6037	0.4841	0.0192	-0.5868	-0.6332
BP0880	putative exported protein (Pseudogene)	0.1682	0.0959	0.3576	0.041	-0.0668	-0.1114	0.1413	-0.0184	0.0842	-0.2707	0.077	0.2899	0.0345	0.1793	0.1027	0.0399	0.215	0.3748	0.0016	0.0244	0.0259	-0.1272	-0.2396	0.1895	-0.0078	0.0767	0.0238	-0.0836	0.1752	-0.0394	0.4048	0.5152	-0.0236	-0.0714	0.2437	0.0126	-0.0742	0.0168	0.0609	0.2227	0.322	0.1851	0.3281	-0.0458	0.4782	0.4689	-0.0599	0.2797
BP0882	conserved hypothetical protein	0.0809	-0.7069	0.4456	-0.365	0.1532	-0.0831	-0.2096	-0.2037	-0.3072	-0.4634	0.1137	0.1859	0.1471	-0.0035	0.2483	0.0103	-0.1505	-0.0875	0.1338	-0.2473	-0.4496	-0.1758	0.3815	0.2458	-0.3054	-0.5882	-0.3118	-0.2378	-0.1186	-0.92	-0.2894	0.2523	-0.1263	-0.0449	0.2298	0.1266	0.1135	-0.1956	0.0057	-0.0083	-0.235	0.2261	-0.0413	0.1625	0.612	0.9033	-0.5458	-0.0557
BP0883	biotin carboxyl carrier protein	0.0477	-0.8141	-0.3444	-0.0583	-0.0651	-0.2255	-0.4976	-0.1291	0.171	-0.5852	0.0391	0.3593	-0.217	0.0833	0.1669	0.2958	0.1836	-0.173	-0.4576	-0.3422	-0.3903	-0.6241	-0.1012	0.4	-0.2511	0.1443	-0.0345	-0.152	0.0782	-0.4426	0.0305	0.0694	-0.0381	-0.1771	0.0875	-0.5119	-0.179	-0.1386	-0.5908	0.2325	-0.2572	-0.0052	0.0921	-0.2822	0.6822	0.8002	-0.4956	-0.0895
BP0884	probable carboxylase	0.1745	-0.4133	-1.0858	-0.7332	0.1723	-0.5438	-0.6484	-0.3768	-0.0157	-0.4332	0.1458	0.6435	-0.5252	0.565	0.6388	0.4001	0.3672	-0.818	-0.0899	-0.2288	-0.0736	-0.541	-0.0201	0.3426	-0.593	-0.3218	-0.8944	-0.242	0.3752	-0.6824	0.059	0.1818	-0.3358	-0.1747	0.7598	-0.0426	-0.39	-0.4217	-0.5579	-0.1858	-1.0673	0.4887	-0.4464	-0.7703	0.6586	0.1209	-0.4053	-0.5171
BP0885	conserved hypothetical protein	0.2005	-0.1515	0.2605	-0.6408	-0.1541	-0.4702	-0.3054	-0.4691	-0.4913	-0.6017	0.3008	0.3068	0.1534	0.0535	0.0148	0.1576	-0.0937	-0.0008	-0.2066	0.0207	-0.1954	-0.3632	0.0666	0.1952	-0.0402	0.3188	0.0122	-0.2372	-0.0243	-0.4077	0.6755	0.0886	-0.27	0.1623	0.464	-0.2705	0.013	-0.0094	-0.0766	-0.0394	-0.4646	0.1668	-0.2763	0.0564	0.5516	0.9357	-0.1255	0.0298
BP0886	conserved hypothetical protein	0.1289	-0.2466	-0.6129	-0.4386	-0.2615	-0.8714	-0.7705	-0.2814	-0.3408	-0.1698	0.214	0.3413	-0.1046	0.1052	0.5812	0.4627	0.1939	-0.2996	0.0026	-0.3291	-0.1607	-0.376	0.1939	0.1081	-0.1339	-0.4201	-0.1866	-0.0093	0.1637	-0.6678	-0.4535	0.2792	-0.1925	-0.037	0.1519	-0.1364	-0.299	-0.3788	-0.253	-0.0433	-0.1647	0.3905	-0.3587	-0.1296	0.6578	0.661	-0.1226	-0.1686
BP0887	conserved hypothetical protein	-0.4655	-0.3207	0.6487	-0.0718	0.1835	-0.1333	-0.193	-0.1672	-0.5029	-0.4882	-0.0254	0.1233	0.5559	0.2108	-0.0827	-0.005	-0.1662	0.0664	0.1336	0.2014	-0.2884	-0.5951	0.3223	0.259	-0.0499	0.3006	0.0955	0.2688	-0.4785	-0.2094	0.4755	0.4717	0.2326	0.2646	0.2214	0.1159	0.1698	0.3115	0.3597	0.2167	-0.1969	0.0241	-0.683	0.3234	0.4718	1.1392	0.0263	0.3145
BP0888	GntR-family transcriptional regulator	-0.2652	-0.0402	-0.3132	0.2303	0.0273	-0.1579	-0.2182	0.6313	0.0297	-0.3716	0.1515	0.0276	0.3235	0.0381	-0.1465	-0.2671	0.1335	-0.0431	-0.0575	0.1708	-0.1192	0.1231	0.374	0.676	-0.309	-0.2254	-0.1165	0.6228	-0.2773	0.0692	0.1911	0.0922	0.2747	-0.0136	0.1515	0.1243	-0.0139	0.339	0.0316	0.6868	0.444	0.0838	0.1544	0.3828	0.32	-0.1337	0.2006	0.5708
BP0889	biotin carboxylase	-0.0098	-0.2163	-0.4964	-0.2676	-0.1817	-0.283	-0.3624	0.2056	-0.2022	-0.8586	-0.0559	-0.1663	0.0119	-0.0362	-0.2548	0.1756	0.0586	-0.2464	-0.2595	-0.5951	-0.1768	0.1719	0.0542	0.2887	-0.2326	-0.2003	-0.2589	0.1328	-0.2811	-0.0172	-0.1132	0.1913	0.024	-0.33	0.1429	-0.0381	-0.0729	0.0269	-0.1065	0.1059	0.3069	-0.0034	-0.3757	-0.0991	0.403	-0.0866	-0.6362	0.3656
BP0890	putative acyl-CoA carboxylase (Pseudogene)	-0.2312	0.065	-0.0282	-0.1167	0.1558	-0.1002	-0.3104	-0.0915	-0.1289	-0.4953	0.4201	-0.0421	0.3381	0.1443	-0.086	-0.2641	0.1488	-0.1757	-0.1437	-0.148	0.0992	-0.1124	0.0141	0.2837	0.0186	-0.0507	0.2007	0.288	-0.0861	0.0448	0.3932	0.1845	0.1322	0.2456	0.1207	0.043	0.0333	0.2321	-0.1165	0.4086	0.1437	0.1151	0.0116	0.2355	0.4641	0.9027	-0.0797	0.4634
BP0891	transposase	-0.022	-0.5564	-0.5633	-0.486	-0.1836	-0.7389	-1.0734	-0.0797	-0.3011	-0.5342	-0.0397	-0.3823	-0.1081	-0.3379	0.3089	-0.1035	-0.3559	-0.6359	-0.489	-0.8873	-0.6237	-1.0346	-0.2292	0.38	-0.7917	-0.136	-0.3065	-0.0976	-0.2018	-0.5679	-0.1751	-0.1387	-0.2364	-0.2183	-0.198	-0.3747	-0.4063	-0.5356	-0.5126	-0.1126	-1.1783	-0.2899	-0.2567	-0.392	0.1447	0.4304	-0.8092	-0.1897
BP0892	hypothetical protein	0.1063	0.139	0.208	0.1976	-0.0704	0.0204	-0.1428	0.1198	-0.2116	-0.1296	0.3094	0.1282	-0.3115	0.0805	-0.005	-0.4058	0.1775	0.0089	-0.2729	-0.0611	0.0048	0.3064	0.593	0.6032	0.0657	-0.1044	0.0838	0.389	0.0319	-0.0172	0.3218	0.8883	0.0301	-0.0938	-0.0553	-0.2257	0.2698	0.0878	-0.0425	0.184	0.2855	0.0452	-0.0184	0.7527	0.8082	0.9565	-0.2054	0.2745
BP0893	hypothetical protein	-0.3025	-0.4908	0.0723	-0.75	-0.2738	-0.7458	-0.6523	-0.7487	-0.7346	-0.4135	-0.2572	-0.2886	-0.0476	-0.1228	-0.3615	0.5251	-0.5797	0.1179	-0.3431	-0.567	-0.6851	-0.8943	-0.2868	-0.0354	-0.0231	-0.3003	0.0895	-0.0855	-0.5357	-0.7588	-0.5728	1.3745	-0.0952	-0.129	0.1027	-0.4693	0.1449	0.3711	0.2892	-0.1128	-0.6589	0.0445	-0.4367	0.5647	1.8028	2.1731	0.0076	-0.1448
BP0894	putative mannose-6-phosphate isomerase	0.0934	-0.0903	0.3077	0.1248	0.2293	-0.1448	-0.378	0.095	0.2871	0.0043	0.1137	0.1443	0.0203	0.3022	0.1777	-0.592	0.3198	0.4369	0.3498	0.1788	0.0876	0.059	-0.0705	0.4973	0.4227	0.3183	0.212	0.4647	0.1696	-0.0105	0.2377	-0.3514	0.2252	0.3339	0.4209	0.1704	0.2549	0.3157	0.3126	0.668	0.0731	0.368	0.2584	0.3374	0.8609	1.0726	0.2651	0.5206
BP0895	conserved hypothetical protein	0.1834	-0.171	0.1201	-0.4269	-0.1354	-0.753	-0.7435	-0.6248	-0.6097	-0.2471	-0.2439	-0.2682	-0.3898	-0.3555	-0.4382	0.617	-0.5509	-0.3503	-0.8061	-0.9587	-0.3799	-0.2516	-0.2009	-0.4516	-0.2345	-0.3331	-0.5626	-0.6892	-0.5804	-0.9088	-0.5019	0.2328	-0.7822	-0.9501	-0.3264	-0.6545	-0.2072	-0.4003	-0.663	-0.5636	-0.3064	-0.0908	-0.3617	-0.2015	0.4123	0.866	-0.3215	-0.4363
BP0896	hypothetical protein	0.2703	0.0811	0.5427	-0.457	-0.0458	-0.3052	-0.3839	-0.2799	-0.4056	-0.9398	0.5948	0.1416	-0.0147	0.0723	0.1473	0.0253	0.006	-0.0167	-0.2616	0.0677	-0.177	-0.1739	0.4674	0.3238	-0.0216	0.484	0.076	0.1591	0.0179	-0.2788	0.3473	0.4017	-0.3452	0.0194	0.4161	-0.3674	0.0365	0.2272	-0.0171	-0.0023	-0.1474	0.4262	-0.0513	-0.0196	0.4323	0.7643	-0.3987	0.2991
BP0897	transposase	0.1299	-0.576	-0.7897	-0.6075	-0.1073	-0.8856	-1.0416	-0.1715	-0.1714	-0.5277	0.318	0.1531	-0.0463	-0.0205	0.7743	0.6299	0.6425	-0.5957	-0.2585	-1.0212	-0.2758	-0.8867	0.093	0.5712	-0.4502	-0.6186	-0.4985	-0.2792	0.0591	-0.6294	-0.0995	0.5843	-0.4182	-0.1324	0.3601	-0.0818	-0.419	-0.7109	-0.6568	-0.3624	-1.0694	0.0559	-0.0773	-0.5691	0.5363	0.6668	-1.2255	-0.5082
BP0898	putative ferredoxin	0.5185	0.3595	0.377	0.0324	0.483	0.2815	0.1729	0.1197	0.4218	0.3323	0.2326	0.6084	0.6099	0.9092	0.39	0.1214	0.2521	0.5007	0.3851	0.3307	0.5652	0.2462	0.0659	0.324	0.6256	0.6353	0.5924	0.0827	0.4507	0.0794	0.2806	0.1437	0.5169	0.4857	0.6769	0.3033	0.6116	0.8271	0.3059	0.2072	0.17	0.6659	0.7701	-0.0317	0.2483	0.1876	0.3745	0.3684
BP0899	ABC transporter, ATP-binding protein	-0.3343	0.2539	0.315	0.1684	-0.0197	-0.3234	-0.1004	0.0741	-0.2248	-0.4324	0.1376	0.1145	0.1687	0.1941	0.7826	-0.3833	0.1603	0.1946	-0.3997	-0.0198	-0.1491	-0.2815	0.2196	0.3628	-0.0673	-0.1188	0.0065	-0.1482	0.2356	0.6083	1.0442	0.9742	-0.1271	0.0879	0.4439	0.0611	0.0304	0.0235	-0.5515	-0.065	-0.2879	0.4654	0.0208	0.2098	0.927	1.1836	-0.0689	0.0067
BP0900	probable oxidoreductase	-0.6854	-0.4405	-0.4325	-0.2519	-0.4	-0.4345	-0.5872	-0.1588	-0.2253	-0.7406	-0.2557	-0.3109	-0.2685	-0.1854	-0.5869	-0.4407	-0.3249	-0.2752	-0.4679	-0.4975	-0.4672	-0.5861	-0.3452	-0.0036	-0.3739	-0.3496	-0.2097	0.0725	-0.251	-0.134	-0.1363	0.503	-0.1389	-0.3194	-0.2301	-0.3137	-0.2852	-0.2092	-0.1602	0.0421	-0.2789	-0.3002	-0.1644	0.0881	0.3543	0.2336	-0.357	0.3029
BP0901	putative oxidoreductase	-0.3283	-0.3465	-0.2797	-0.3646	-0.5212	-0.5364	-0.5668	-0.3694	-0.4126	-0.5133	-0.1597	-0.2101	-0.3749	-0.1866	-0.2159	0.5016	-0.2818	-0.1954	-0.5776	-0.8365	-0.2799	-0.3982	-0.1149	-0.1032	-0.1633	-0.2511	-0.4528	-0.2106	0.0527	-0.4798	0.0155	0.3077	-0.2292	-0.3246	-0.0595	-0.4232	-0.2404	-0.311	-0.3941	-0.1994	-0.3791	-0.0793	-0.2078	-0.1053	0.5288	0.6267	-0.1859	-0.0742
BP0902	putative membrane protein	-0.1721	-0.3199	0.185	-0.6078	-0.2851	-0.1378	0.6339	0.1724	0.7693	-0.4714	-0.2649	-0.1578	-0.1713	0.5164	0.4282	0.7466	0.1281	0.2166	-0.163	-0.2023	0.648	0.0374	-0.1981	0.3183	-0.1119	0.1293	0.5057	0.2481	-0.2186	-0.5439	-0.5745	0.8201	0.207	0.0074	0.4529	0.1518	0.3303	0.17	-0.1428	0.0179	0.1253	0.5018	0.8872	0.819	0.9198	0.874	0.042	-0.3511
BP0903	putative membrane protein	0.19	-0.2141	-0.445	-0.2671	-0.2612	-0.1477	0.722	0.3302	0.054	-0.3649	0.2002	0.2527	0.0948	0.146	0.8148	0.2079	0.7779	-0.5727	-0.1002	-0.3078	0.3763	0.1744	0.4398	0.7545	-0.3182	-0.2164	0.1279	0.423	-0.202	-0.6673	-0.132	0.178	-0.2165	0.0308	0.2024	0.2519	-0.067	-0.0425	-0.5092	0.2101	0.218	0.4011	0.0364	0.3879	0.6496	0.3699	-0.2987	-0.0636
BP0904	serine/threonine protein phosphatase 1	-0.0776	-0.0377	0.3196	-0.4957	0.0593	0.0942	0.0801	-0.4514	-0.2652	-0.1792	0.1675	0.2116	0.0477	0.2382	-0.1667	-0.7261	-0.1892	-0.0318	-0.3163	0.0091	0.1198	-0.1067	-0.039	-0.0018	0.0262	0.2972	0.0594	-0.1587	0.2091	-0.0712	0.3105	0.8247	-0.1542	0.0567	0.3658	-0.0979	0.2136	0.1119	-0.1096	-0.3343	0.0056	0.3299	-0.063	0.4629	0.8661	1.2038	0.0994	-0.3195
BP0905	penicillin-binding protein 1A	-0.0987	-0.1101	-0.2025	-0.2143	-0.2799	-0.7021	-0.6456	-0.3092	-0.5025	-0.7781	-0.0738	-0.0807	-0.2117	0.1386	-0.0045	-0.2362	0.0742	0.0024	-0.1935	-1.2384	-0.5046	-0.453	-0.0063	0.6389	0.0288	0.1432	0.387	0.4526	-0.3772	-0.6884	-0.2724	0.4051	0.0089	-0.8216	0.2842	-0.11	0.0241	0.1278	0.2643	0.3035	-0.4998	0.2451	-0.2307	-0.0053	0.6903	0.4996	-0.1399	0.5575
BP0906	putative peptidase	-0.1271	-0.0879	-0.4818	0.1168	-0.3138	-0.7257	-0.2981	0.1659	-0.1416	-0.6815	0.051	0.1752	0.5677	0.2821	-0.0448	0.4861	0.3208	0.0269	0.1997	-0.6163	0.047	-0.2016	0.0261	0.5245	0.0791	0.1441	0.3526	0.4659	-0.3246	-0.5016	-0.3061	0.5005	0.3143	-0.3267	0.2851	0.4561	-0.068	0.3174	0.0702	0.7278	0.0902	0.4372	0.1754	0.3602	0.4741	0.2021	-0.2694	0.6793
BP0907	putative lipoprotein (Pseudogene)	-0.1086	0.1911	0.4519	-0.0973	0.1375	0.3193	0.1849	0.1329	0.2913	0.2745	0.155	0.212	0.0995	0.4575	0.4344	-0.6021	0.2238	0.4485	0.1374	0.4314	0.2329	0.5034	0.5141	0.467	0.3391	0.1088	0.4938	0.3233	-0.5866	-0.5561	-0.5115	0.3163	0.4006	0.6519	0.6768	0.1959	0.485	0.5507	0.5209	0.5381	0.4814	0.2856	0.5238	0.4337	0.4291	0.7613	0.6397	0.2825
BP0908	conserved hypothetical protein	-0.0809	-0.0442	-0.2047	-0.2367	-0.2499	-0.5724	-0.5286	-0.3165	-0.035	-0.517	-0.1621	0.0913	-0.4232	0.1529	-0.0081	0.399	-0.2013	0.1782	-0.1196	-0.701	0.0261	-0.0487	-0.2581	0.0529	0.1066	-0.0751	0.0582	0.2123	0.2813	0.0202	0.2031	0.1323	-0.2758	-0.4103	0.3019	-0.0272	-0.0155	0.076	-0.2434	-0.0722	-0.4572	0.0928	-0.0801	-0.0422	0.2425	0.2074	-0.4098	0.0412
BP0909	DNA-damage-inducible protein p	0.1663	0.0302	0.007	0.2	0.0034	-0.0467	-0.2503	0.4639	0.5861	-0.0265	0.1114	0.3412	0.0271	0.3601	0.2574	-2.3134	0.3115	0.1423	0.0272	0.0208	0.3747	0.1636	0.3889	0.4479	0.3196	0.4624	0.2399	0.4409	0.0397	-0.5116	0.0197	0.7109	0.2616	0.2175	0.4722	0.0571	0.2616	0.1982	0.2008	0.465	0.0334	0.4825	0.5004	0.2042	0.7204	0.5644	0.643	0.4999
BP0935	putative exported protein	-0.0804	-0.3153	-0.8995	-0.4842	-0.1725	-0.5446	-0.8072	-0.3404	-0.4383	-0.4291	0.2039	0.262	-0.0701	0.0589	0.2682	-0.0665	-0.0017	-0.6538	-0.3435	-0.432	-0.4211	-0.1887	-0.1412	0.0735	-0.2012	-0.489	-0.5187	-0.3578	-0.0742	-0.8496	-0.2636	0.2848	-0.2539	-0.1629	0.1401	-0.2	0.0122	-0.2375	-0.6637	-0.0608	-0.1847	0.2249	-0.379	-0.3828	0.7315	0.4556	-0.5402	-0.5882
BP0936	LysR-family transcriptional regulator	0.0549	-0.3623	-0.0989	-0.3738	-0.172	-0.5796	-0.4627	-0.1394	0.3137	-0.4165	-0.0193	0.0953	-0.1478	0.2341	0.1088	0.1177	-0.2288	0.4108	-0.1191	-0.273	-0.0471	-0.3504	-0.3319	0.1213	-0.1321	-0.1424	-0.0067	-0.2727	0.2662	-0.3442	0.0348	0.7809	-0.0388	0.0541	0.3535	-0.2381	-0.0632	0.0933	-0.2482	0.0381	-0.2029	0.3643	0.0747	-0.151	0.8968	1.2035	-0.4067	-0.0413
BP0937	phage-related protein	-0.2056	-0.0148	-0.1896	0.1656	-0.0662	0.5402	0.433	0.8047	0.4852	0.008	0.3075	0.2738	0.298	0.4084	0.3268	0.3172	0.3672	0.1798	0.3548	0.1655	0.1579	0.0806	0.229	0.6895	0.147	-0.0982	0.1539	0.5131	-0.3944	-0.1044	-0.1506	0.7031	0.6061	0.2099	0.1652	0.4155	0.2398	0.3271	0.1889	0.5401	0.4211	0.2041	0.1696	0.4564	0.6943	0.3474	0.0338	0.7022
BP0939	conserved hypothetical protein	0.2162	0.2375	-0.5408	-0.3378	0.0838	-0.1832	-0.4599	-0.3123	-0.5532	-0.9102	0.1496	-0.4836	0.2974	-0.1968	0.1514	0.0644	-0.2647	-0.3747	-0.3161	0.1462	-0.4418	-0.0719	0.2149	0.2756	-0.1122	-0.3628	0.0119	0.0657	-0.6071	-0.3924	0.1023	0.1876	0.1617	0.1835	-0.3452	-0.0632	0.0983	0.0548	-0.2505	-0.1916	0.1473	-0.1242	-0.1363	0.0632	0.5767	0.3938	-0.1433	0.1751
BP0940	putative sugar efflux transpoter	0.2083	-0.3886	0.2316	-0.6228	0.2047	-0.1694	-0.4622	-0.712	-0.3606	-0.1988	0.353	0.3085	-0.0372	0.1385	0.5422	-0.2332	-0.3563	-0.0483	-0.2025	-0.1303	-0.4729	-0.2242	-0.4869	-0.2203	-0.3137	-0.2859	-0.3861	-0.3867	0.2444	-0.285	-0.0068	-0.1457	-0.1073	0.1524	0.4061	-0.2099	-0.147	-0.2954	-0.1939	-0.3929	-0.2845	0.367	-0.1269	-0.3051	0.76	0.5795	0.4712	-0.5224
BP0941	putative phosphoglycolate phosphatase	-0.0743	-0.4026	-0.5117	-0.0599	-0.2345	-0.571	-0.3601	0.2703	-0.148	-0.4154	0.087	0.1208	0.0488	0.3943	0.2544	-0.5149	0.4346	0.1535	0.2076	-0.3602	0.0079	-0.3379	-0.0354	0.5955	0.1283	0.0893	0.3119	0.4023	0.2959	0.0357	0.3046	0.4085	0.4073	-0.2303	0.3642	0.0887	0.0399	0.1648	0.0295	0.4228	-0.0394	0.3627	0.3446	0.1928	0.3287	0.119	0.2031	0.4582
BP0942	3-demethylubiquinone-9 3-methyltransferase	-0.2326	-0.4043	-0.6586	0.0531	-0.5941	-0.3784	-0.5665	0.1635	-0.338	-0.7779	-0.1983	-0.186	-0.1933	0.1473	0.0531	-0.5559	0.3195	-0.2331	-0.0607	-0.8635	-0.2334	-0.3259	0.1361	0.4273	-0.0429	-0.0877	0.1601	0.5958	-0.141	-0.3799	-0.2119	-0.0031	-0.0182	-0.6563	-0.2344	-0.0812	-0.2137	0.0114	-0.2921	0.3078	-0.2072	0.0335	-0.1036	-0.1966	0.1075	-0.4594	-0.3359	0.4337
BP0943	outer membrane protein A precursor	-0.7986	0.0896	-0.0367	-0.6145	0.0043	0.1525	0.2179	0.0378	-0.6057	-0.0196	-0.2403	-0.555	-0.3172	-0.3418	-0.4297	0.3815	-0.5647	0.045	-0.3921	0.3474	-0.5456	-0.0546	-0.2455	0.0332	-0.2709	-0.1833	-0.0637	0.3049	-0.2471	-0.1655	-0.2519	0.0762	-0.0355	-0.3723	-0.3448	-0.1373	0.2943	0.1976	0.3757	-0.4322	0.036	-0.1573	-0.5519	0.0148	0.0355	0.3111	0.8336	-0.2399
BP0944	DNA gyrase subunit A	-0.0236	-0.005	-0.123	0.1078	0.1565	0.2017	0.4273	0.4392	0.2035	0.0529	0.1697	0.0879	0.1538	0.171	0.3191	0.2713	0.3204	0.197	0.2568	0.3436	0.1338	0.1326	0.6175	0.5648	-0.0141	-0.0316	0.1809	0.4437	0.0202	0.2053	0.2594	-0.2772	0.34	0.3457	0.1207	0.2537	0.3829	0.3007	0.2047	0.469	0.3572	0.1046	0.2777	0.0229	-0.1486	-0.1103	0.4439	0.4867
BP0945	phosphoserine aminotransferase	-0.273	-0.1734	0.1082	-0.2601	-0.0311	-0.1204	-0.1644	-0.0288	0.0982	-0.5144	0.0134	0.1708	0.2568	0.2836	0.0784	0.107	0.054	0.1298	0.0947	-0.1467	0.062	-0.4154	-0.4422	0.3063	0.0225	-0.0956	0.2201	0.198	0.2043	-0.1281	0.0117	0.3088	-0.0109	0.1449	0.2717	-0.0362	0.0817	0.0738	0.1103	0.2017	-0.1249	0.2907	0.0637	0.0965	0.3088	0.5132	-0.2355	0.2893
BP0946	p-protein [includes: chorismate mutase and prephenate dehydratase]	-0.1249	-0.0664	-0.1901	0.0946	-0.1017	-0.2931	-0.1464	0.3287	0.0761	-0.2073	-0.0946	-0.0261	0.0429	0.0784	0.0677	0.4401	0.2171	0.0649	0.0534	-0.0706	0.0147	0.0017	0.3517	0.4604	0.0261	-0.0091	0.1056	0.2926	-0.1491	-0.2039	-0.0636	0.2972	0.1696	0.1264	-0.0011	-0.1265	0.2437	0.1165	0.1196	0.3997	0.2751	0.0366	0.1692	0.2073	0.29	0.407	0.0799	0.4063
BP0947	prephenate dehydrogenase	0.1477	0.0826	0.1275	0.0734	0.1579	0.033	-0.1336	0.1923	0.2159	0.2211	0.2757	0.0969	0.1207	0.3126	0.1468	0.5979	0.1398	0.3357	0.3295	0.5642	0.2413	0.4588	0.321	0.3346	0.1182	0.169	0.1427	0.2817	0.0048	0.1149	0.1216	0.4312	0.4194	0.372	0.34	0.2573	0.2346	0.2369	0.1818	0.5112	0.3346	0.2432	0.4611	0.3423	0.483	0.6833	0.444	0.5256
BP0948	3-phosphoshikimate 1-carboxyvinyltransferase	-0.1945	-0.0369	0.1965	-0.1435	0.0562	-0.0641	-0.1154	-0.0769	-0.0469	-0.2424	0.1219	0.1653	0.1345	0.1972	0.1993	0.2962	0.0941	0.1374	0.0332	0.375	-0.0074	-0.0506	0.2283	0.2055	0.0373	0.0984	0.2502	0.1025	-0.0817	-0.0431	0.1135	0.2449	0.2269	0.4856	0.3893	0.0849	0.2415	0.2802	0.1756	0.2029	0.0926	0.1724	0.0557	0.2034	0.4571	0.624	0.0523	0.2997
BP0949	cytidylate kinase	-0.0727	-0.0396	0.1953	-0.3472	0.0218	0.0885	-0.0286	-0.0324	0.0168	0.1102	0.1547	-0.0358	0.1614	0.0366	0.1126	0.286	-0.0945	0.168	-0.0879	0.5475	0.1182	0.0498	0.3329	0.2116	-0.0931	-0.0547	-0.0603	0.0934	-0.037	-0.013	0.0531	0.6064	0.2349	0.2612	0.0825	0.0537	0.2436	0.3153	0.0803	0.1394	0.1703	0.0847	0.0979	0.3436	0.3703	0.8031	0.2569	0.1647
BP0950	30S ribosomal protein S1	-0.2032	-0.0288	0.0131	-0.5236	-0.2483	0.3701	0.0435	-0.0662	0.2164	-0.0292	0.1745	0.0591	0.3639	-0.0362	-0.183	-0.255	-0.3606	-0.2647	-0.1188	-0.0481	-0.1193	-0.2512	-0.267	0.0253	-0.279	-0.216	0.0392	-0.3072	0.578	0.5254	0.744	0.0843	0.016	0.1063	0.0519	-0.1203	-0.2326	-0.0294	-0.2122	-0.1534	-0.0151	0.1081	-0.0839	-0.3164	0.2541	0.3729	-0.0718	-0.0751
BP0951	integration host factor beta-subunit	-0.3189	-0.0503	0.6373	-0.484	-0.0446	0.2993	0.2119	-0.2072	0.2054	0.2795	-0.2513	0.0685	0.9911	0.1707	-0.436	0.5209	-0.6661	0.4377	-0.1066	-0.4765	0.1291	-0.2364	-0.7106	-0.1066	-0.0193	-0.2981	0.6517	-0.3253	0.3057	0.4221	0.2099	0.2067	0.0178	0.0613	0.0344	-0.2541	0.0133	0.143	0.2148	-0.2832	-0.2954	0.0199	0.2072	-0.0863	0.2725	0.9266	0.0083	-0.4071
BP0952	putative membrane protein	0.0081	-0.068	-0.3696	0.07	-0.0119	-0.1206	-0.4203	0.3785	0.3351	-0.5662	0.0251	0.486	-0.1581	0.3343	0.2525	-0.4954	0.2813	0.1383	0.084	0.5958	0.0488	0.1732	0.3497	0.406	0.1668	0.2475	0.0939	0.3275	0.1522	-0.1143	0.0189	0.2071	0.2791	0.6535	0.398	0.1417	0.0666	0.1284	0.0701	0.4577	0.2109	0.2529	0.2905	0.0498	0.2303	-0.0832	-0.083	0.4444
BP0953	putative membrane protein	-0.0211	0.0352	0.1055	0.3247	0.0452	-0.2498	0.21	0.2302	0.2731	0.1084	0.1659	0.0907	0.3437	0.5829	0.0958	0.251	0.3555	0.4043	0.4135	-0.5494	0.4742	0.2129	0.2595	0.7067	0.4392	0.3902	0.5999	0.7954	0.3221	0.3244	0.3425	0.5103	0.5512	-0.2855	0.1971	0.3991	0.216	0.405	0.2115	0.706	0.5771	0.3239	0.519	0.4108	0.4511	0.4111	0.134	0.9814
BP0954	ADP-heptose synthase	0.1914	-0.1334	0.0577	-0.14	-0.0658	-0.4463	-0.6385	-0.1217	-0.1395	-0.6746	0.207	0.1348	0.1458	0.2084	0.2848	0.1567	0.1005	0.172	-0.1105	-0.2998	-0.0784	-0.3817	0.0465	0.3519	0.1865	0.1489	0.1751	0.1393	0.2439	-0.2382	0.6963	0.4566	-0.009	-0.166	0.2803	-0.1683	-0.0412	0.0791	-0.0711	0.1423	-0.0576	0.283	0.0794	0.1688	0.7104	0.8282	-0.0126	0.1799
BP0955	ADP-L-glycero-D-manno-heptose-6-epimerase	-0.1871	-0.2212	0.3057	-0.1832	0.091	-0.223	-0.3225	-0.2866	-0.1567	0.0492	0.1591	0.203	0.0398	0.0753	0.0328	-0.0385	-0.1316	0.063	-0.1301	0.037	-0.1399	-0.3643	-0.2765	-0.0176	0.0348	-0.0517	-0.1086	0.0235	0.2134	-0.0624	0.1464	0.4446	0.1996	0.4307	0.2164	-0.1177	-0.0352	0.0592	0.1481	0.0812	-0.2696	0.262	-0.0228	0.1467	0.4465	0.7944	0.2002	0.0768
BP0956	conserved hypothetical protein	-0.0463	0.0461	0.2998	-0.138	-0.2023	-0.2922	-0.3924	-0.2058	-0.0383	-0.3091	0.0405	-0.0343	0.3531	0.206	-0.1912	-0.0596	0.0734	0.3395	-0.1007	-0.6634	0.0311	-0.0185	-0.1307	0.3828	0.3768	0.034	0.4008	0.0973	0.2801	-0.1433	0.4916	0.4516	0.0638	-0.1893	0.1731	-0.1525	-0.0081	0.0725	-0.4412	0.1883	0.0199	0.1257	0.3052	0.0452	0.5343	0.4955	-0.2657	0.2747
BP0958	cysteine synthase B	0.2212	0.2619	0.2364	0.1387	0.1571	-0.2024	0.1754	-0.1372	-0.1812	-0.0657	0.1443	0.1371	0.0081	0.2382	0.191	-0.1839	0.2522	0.1657	0.1026	-0.295	-0.0335	0.2589	-0.0247	0.1922	0.3254	0.2952	0.2383	0.2593	0.0483	-0.0305	-0.0294	0.3807	0.259	-0.0887	0.354	-0.0052	0.1185	0.1841	0.1539	0.169	-0.0314	0.2058	0.1258	0.0005	0.4324	0.4579	0.0812	0.309
BP0959	membrane-bound lytic murein transglycosylase B precursor	-0.0167	0.6063	-0.3405	-0.0599	-0.0821	-0.1621	-0.1824	0.1677	0.0432	-0.3722	-0.0343	0.151	-0.0878	-0.0686	-0.1081	-1.1873	0.0291	-0.2727	-0.2591	-0.4338	-0.2511	0.1154	0.2189	0.219	-0.0856	-0.3311	-0.1351	0.0321	0.0843	-0.1369	0.3098	0.6392	0.0348	-0.2229	-0.1071	-0.1555	-0.1271	-0.0955	-0.1258	0.2035	0.002	-0.0352	-0.1457	0.3628	0.6455	0.5572	-0.0142	0.2282
BP0960	histone deacetylase family protein	-0.2661	-0.1042	-0.3648	-0.1071	-0.2951	-0.5376	-0.4956	-0.0358	-0.0546	-0.8913	-0.4565	-0.2202	-0.1862	-0.1395	-0.4133	-0.1059	-0.2727	-0.3601	-0.5644	-1.525	-0.2542	-0.3917	-0.1997	0.0543	-0.2908	-0.5099	-0.2373	-0.3097	-0.2384	-0.5236	-0.1301	1.185	-0.2627	-1.0638	-0.0647	-0.4676	-0.4544	-0.3527	-0.3577	0.0222	-0.2438	-0.3814	-0.1174	0.0287	1.2376	1.2399	-0.6485	-0.0792
BP0961	electron transfer flavoprotein beta-subunit	-0.1743	-0.1368	-0.218	0.0417	-0.1226	-0.2758	-0.109	0.3308	0.0341	-0.5934	0.0485	0.0925	0.0135	0.149	-0.2342	0.2356	-0.0094	-0.0963	-0.1251	-0.1753	-0.153	-0.1983	0.3573	0.377	-0.1324	0.0167	-0.2061	0.3	-0.0491	-0.0407	0.0956	0.511	0.135	0.0362	0.1088	-0.0276	-0.0738	0.1801	0.0217	0.4307	0.1801	0.2728	0.0396	0.3819	0.6742	0.454	-0.2698	0.5532
BP0962	electron transfer flavoprotein alpha-subunit	-0.2441	-0.2334	0.1474	-0.498	-0.0204	-0.1116	0.015	-0.1548	0.2418	-0.0429	0.0622	0.1893	0.1262	0.2001	-0.1266	0.3647	-0.4054	0.093	-0.031	0.17	0.0336	0.0242	0.1635	-0.05	-0.1244	0.0856	0.0988	-0.2175	0.1165	-0.0786	0.0991	0.4798	0.2457	0.2928	0.3628	0.1879	-0.1359	0.0982	-0.0349	-0.0157	0.057	0.2998	0.2955	0.1463	0.5705	0.8023	0.2528	-0.0022
BP0964	probable acyl-CoA dehydrogenase	-0.1008	-0.1939	-0.51	0.133	0.0376	-0.1536	-0.1558	0.629	0.4953	-0.8221	-0.0019	0.0346	-0.131	0.2024	0	-0.0707	0.3262	-0.114	0.0899	0.1639	0.1457	0.2464	0.5075	0.5162	0.1038	0.0595	0.0253	0.6411	-0.0442	-0.3821	-0.1418	0.3845	0.24	0.2992	0.2722	0.3031	0.1366	0.1317	0.038	0.4711	0.3422	0.1535	0.3345	0.3385	0.3262	-0.0105	-0.3348	0.6092
BP0965	antioxidant protein	-0.3502	-0.303	-0.4217	-0.2774	-0.4182	-0.198	0.068	0.2952	0.2322	-0.5724	-0.0925	0.148	0.0507	0.3639	-0.0776	-0.611	0.139	-0.1641	-0.0587	-0.622	-0.1829	-0.6106	-0.4083	0.3377	0.2593	0.1618	0.5326	0.4448	-0.8101	-1.1321	-1.19	0.2397	0.3116	0.0187	0.2221	-0.0202	0.0121	0.2205	0.0766	0.3466	-0.1933	0.4005	0.1372	-0.0648	0.2567	0.1081	-0.3411	0.2524
BP0966	sulfate-binding protein precursor	-0.6527	-0.7883	-0.6314	-0.8799	-0.748	1.0686	2.0329	0.5058	0.545	-1.0977	-0.597	-0.5399	-0.5207	-0.4024	-0.6085	-0.5206	-0.7892	-0.2603	-0.4808	-0.8148	-0.3471	-0.7526	-0.8288	-0.4536	0.2066	0.1667	0.1285	0.1614	-0.7351	-1.3134	-1.286	-0.9944	0.0667	-0.6302	-0.397	-0.5604	0.1171	0.0625	-0.5033	-0.3903	-0.7882	-0.2296	-0.76	-1.1222	-0.3429	-0.5786	-0.6781	-0.4167
BP0967	sulfate transport system permease protein (Pseudogene)	-0.2625	-0.3772	-0.5123	-0.7932	-0.4585	0.4489	1.3855	0.0206	0.3584	-0.2358	-0.4433	-0.2025	-0.492	-0.0689	-0.3184	0.0147	-0.2912	-0.3001	-0.4306	-0.7162	-0.2559	-1.0362	-0.4242	-0.3956	0.3713	0.2832	0.2875	-0.2064	-0.2882	-1.1164	-0.8149	-0.2356	-0.0598	-0.4231	-0.0257	-0.4369	0.2246	0.0215	-0.6065	-0.4845	-0.9451	0.0668	-0.4934	-0.8353	0.109	0.1477	-0.0943	-0.6233
BP0968	sulfate transport system permease protein (Pseudogene)	-0.3118	-0.108	-0.008	-0.4796	0.0098	0.7343	1.1104	0.2874	0.771	-0.4519	0.1281	-0.153	-0.175	-0.0664	-0.1923	0.063	-0.3705	0.1831	-0.276	0.2489	0.0131	-0.1483	0.1505	0.0937	0.3823	0.6118	0.3529	0.306	-0.4025	-0.6273	-0.4029	-0.21	0.3779	-0.0197	-0.2189	-0.2905	0.402	0.2592	-0.123	-0.3109	-0.3396	0.0314	-0.1235	-0.2933	0.1852	0.3446	0.116	-0.2874
BP0969	sulfate transport ATP-binding protein	-0.0375	-0.1865	-0.2232	-0.2658	0.0585	-0.156	0.4482	-0.0357	0.0689	-0.4544	-0.1319	-0.0185	0.0417	0.0953	-0.0577	-0.0454	0.0364	-0.0384	-0.2153	-0.0901	-0.002	-0.2255	0.251	0.217	0.3209	0.2669	0.0687	0.1703	-0.3337	-0.3798	-0.1161	0.2208	0.0611	-0.0012	0.2454	-0.1485	0.1376	0.0299	-0.1681	-0.0658	0.0053	0.1438	-0.1718	-0.1183	0.3418	0.344	-0.2449	0.0155
BP0970	phosphoadenosine phosphosulfate reductase (Pseudogene)	-0.3621	-0.009	0.1671	-0.3405	-0.1523	0.2657	0.9941	0.503	0.8342	-0.3263	-0.127	0.5841	-0.2458	0.1684	0.1464	-0.3002	-0.1301	-0.1071	-0.2228	-0.1907	0.1098	-0.3049	-0.017	0.3126	0.6087	0.6017	1.114	0.6732	0.2379	-0.2687	-0.3864	0.3285	0.2977	-0.3307	-0.1587	0.2232	0.1778	0.0346	-0.0593	0.4173	-0.5238	0.5439	-0.0708	-0.0037	0.5042	0.0483	-0.2874	0.1886
BP0970A	sulfate adenylyltransferase subunit 2	-0.162	-0.4842	-0.7887	-0.518	-0.3139	0.4139	0.7816	0.3595	0.3309	-0.5143	-0.1984	-0.1483	-0.3273	0.0652	-0.318	0.0886	-0.4021	-0.3063	-0.3057	-0.914	-0.1901	-0.8459	-0.3158	-0.0504	0.04	0.0136	0.1248	0.3425	-0.3582	-0.8513	-0.4516	0.0653	0.246	-0.6103	-0.2828	-0.13	-0.107	-0.2709	-0.7846	-0.0277	-0.7446	0.184	-0.5732	-0.4802	0.2961	-0.0214	-0.6032	-0.1667
BP0971	sulfate adenylyltransferase subunit 1 (Pseudogene)	-0.0975	-0.4809	-0.3993	-0.6064	-0.1425	-0.5114	0.226	-0.3589	0.013	-0.9362	-0.3031	0.3685	-0.5565	0.2269	0.2206	-0.2099	0.4995	-0.6808	-0.4815	-0.4278	0.7517	-0.0582	0.2749	0.8521	-0.1176	0.4723	0.179	0.1061	0.1615	-1.2504	-0.9038	-0.0861	-0.122	-0.1424	0.3402	-0.0492	-0.1351	-0.4643	-0.6239	-0.4216	-0.692	0.4958	-0.603	-0.5372	0.6632	0.4541	-0.3089	-0.2897
BP0972	conserved hypothetical protein	-0.2728	-0.1341	-0.1078	0.2239	-0.3064	-0.513	-0.2052	0.2312	-0.0117	-0.7581	-0.263	-0.0134	-0.1166	0.1555	-0.386	-0.1723	0.0982	0.0476	-0.0091	-0.402	-0.1167	-0.0988	-0.449	0.2791	0.1127	0.1024	0.1992	0.4991	0.5968	0.4984	0.3291	1.5135	1.0865	0.9376	1.2352	-0.1506	-0.248	0.0285	-0.0966	0.2068	-0.3465	0.0053	0.0722	-0.0744	0.3101	0.2382	-0.2532	0.1807
BP0973	putative membrane protein	-0.3064	-0.4482	-0.53	-0.2148	-0.1633	-0.5752	0.1355	0.0445	-0.2355	-0.5267	-0.056	-0.0233	-0.176	-0.1005	-0.2182	0.3464	-0.0422	-0.403	-0.4644	-0.4738	-0.5687	-0.4023	-0.259	0.2067	-0.2145	-0.3116	-0.1688	0.0746	0.4492	0.3289	0.3559	1.1227	0.8879	0.812	0.9865	-0.2722	-0.068	-0.113	-0.4094	0.0406	-0.383	-0.0501	-0.3522	-0.0517	0.0798	0.0765	-0.4125	0.103
BP0974	putative membrane protein	0.0285	0.3787	0.4923	0.0702	0.334	0.0518	0.2931	0.0781	-0.2383	-0.4786	0.5873	0.0708	0.3807	-0.0188	0.0127	0.5287	0.1852	0.501	-0.0035	0.3949	-0.1688	0.1205	0.5272	0.5489	0.2264	0.0538	0.463	0.5712	-0.2491	-0.0341	0.5487	0.4676	0.4593	0.4293	0.364	-0.0671	0.3613	0.5611	0.7196	0.3896	0.1452	-0.073	0.1534	0.5086	0.5235	0.9952	-0.2038	0.3949
BP0975	50S ribosomal protein L19	0.1228	0.1246	0.3678	0.3368	0.0755	-0.0081	-0.1776	0.3763	0.4149	-0.001	0.085	0.4678	0.3287	0.649	0.1229	0.7514	0.5479	0.2295	0.2448	-0.1412	0.6634	0.043	0.2144	0.6848	0.4511	0.2645	0.6798	0.6088	0.3279	0.05	0.1309	-0.4741	0.196	0.1774	0.4537	0.122	0.2267	0.2318	0.2674	0.6067	0.0465	0.5832	0.5313	-0.2997	-0.3148	-0.4398	0.1636	0.5613
BP0976	conserved hypothetical protein	0.0181	-0.2605	-0.0924	-0.4313	-0.2369	-0.4407	-0.5098	-0.2992	-0.3746	-0.1608	0.2269	0.1138	-0.1157	0.2064	0.2609	-0.0563	0.0209	0.1112	0.304	0.3891	0.1923	-0.2065	0.0555	0.3958	0.2087	0.3349	0.2585	0.1461	0.0728	-0.1158	0.2712	0.3993	0.0795	0.399	0.4049	0.0033	0.2582	0.2381	-0.1089	0.1675	-0.1582	0.3717	0.039	0.254	0.5676	0.4983	0.2962	0.2098
BP0977	probable oxidoreductase	-0.3442	-0.4034	-0.8338	-0.2414	-0.4213	-0.1332	-0.1367	0.5904	0.2127	-0.2156	0.1988	0.1646	0.403	0.2502	0.3192	0.0403	0.4791	-0.0101	0.0658	-0.4323	0.0447	-0.0624	0.4351	0.7868	0.0693	0.066	0.491	0.6365	-0.191	-0.4936	-0.0141	1.2145	0.263	-0.1199	0.3095	0.1974	0.1272	0.0377	0.0234	0.6406	0.1627	0.4094	0.3107	0.6264	1.1148	0.9029	0.1533	0.5127
BP0978	transposase for IS1663	0.134	0.1637	0.4766	-0.0573	0.2611	-0.4799	-0.4873	-0.3928	-0.089	0.0323	0.1682	0.5739	0.312	0.1807	0.0935	-0.3542	-0.134	0.1774	-0.0939	-0.1812	-0.2558	-0.1389	0.3354	0.0854	-0.0445	0.3634	0.1068	-0.0844	-0.6204	-1.0296	-0.8855	0.3535	0.0696	0.277	0.4181	-0.0535	0.1022	0.1475	0.1444	0.1973	-0.145	0.366	0.3662	0.2053	0.7779	0.704	0.0052	0.0685
BP0980	conserved hypothetical protein (Pseudogene)	0.1128	-0.1985	-0.3909	-0.1092	0.1134	-0.4119	-0.7503	-0.3595	-0.0783	0.211	0.0972	0.3562	-0.1551	0.4412	0.1387	0.1532	-0.0754	0.3658	0.4118	-0.21	0.1218	-0.1473	-0.5274	0.0634	0.0768	0.3929	0.1772	-0.3429	0.0258	0.0679	-0.0444	0.7335	0.1127	-0.1089	0.2313	0.3046	-0.0694	0.1581	-0.7427	0.0731	-0.1143	0.3437	0.6229	0.3152	0.7839	0.9986	0.5537	-0.0317
BP0981	conserved hypothetical protein	0.1578	-0.149	0.1064	-0.2363	-0.0776	-0.5336	-0.5733	-0.3394	-0.4286	-0.7345	0.3744	0.3296	0.0002	-0.0887	0.1005	0.0598	0.0912	-0.1211	-0.2462	-0.0942	-0.325	-0.2998	-0.0966	0.0551	-0.1222	-0.014	0.0899	0.0241	0.1238	-0.1246	0.409	0.5306	-0.0807	0.0019	0.2344	-0.152	-0.2478	-0.2578	0.0125	0.1278	-0.1374	0.0832	-0.1377	0.2051	0.5317	0.742	-0.3122	0.2675
BP0982	putative RNA pseudouridylate synthase	0.1358	0.0665	0.7216	-0.387	0.1794	-0.3145	-0.0652	-0.5649	-0.2566	0.0585	0.1316	0.0968	0.196	0.3808	0.2131	0.0931	-0.4477	0.3915	0.0117	-0.3026	0.0186	-0.0555	-0.4051	-0.1709	0.2015	-0.0049	0.1568	-0.0541	0.3148	0.0184	0.144	0.2493	0.068	0.0612	0.328	-0.2147	0.4192	0.3044	0.2237	-0.2085	-0.103	0.3924	0.2671	0.1087	0.3111	0.8794	0.0623	-0.1393
BP0983	LysR-family transcriptional regulator	-0.0476	-0.3697	-0.431	0.2491	-0.2862	0.1259	-0.2285	0.856	0.4427	-0.5961	0.043	-0.0105	0.0541	0.3193	0.1592	-0.0144	0.6343	-0.1642	0.0797	-0.185	0.0365	-0.387	-0.0317	0.6425	-0.0529	-0.0047	0.2997	0.6077	0.1419	-0.2915	0.2116	0.3556	0.0503	-0.0998	-0.0037	-0.0046	0.0074	0.0458	-0.0592	0.6848	-0.2743	0.2526	0.2429	0.0837	0.7132	0.2746	-0.0617	0.8304
BP0984	acriflavine resistance protein a precursor (Pseudogene)	-0.3478	-0.6189	-0.2215	-0.6727	-0.5394	-1.3199	-1.1712	-1.5419	-1.4402	-0.0886	-0.0903	0.0261	-0.3321	0.3688	0.1349	0.0902	-0.1434	0.3853	-0.0198	-0.1104	0.0619	-0.127	-0.0778	-0.0259	0.0812	0.1708	-0.0787	-0.1874	0.9385	0.2731	0.2977	0.3824	0.3623	0.2015	0.5116	0.1795	0.4749	0.278	-0.0587	-0.0978	-0.0744	0.2393	-0.1339	0.4439	0.2817	0.3909	0.2111	0.0505
BP0985	acriflavine resistance protein B	-0.3291	-0.4371	-0.5807	-0.3706	-0.4294	-1.0627	-1.2637	-1.0998	-1.1696	-0.4802	0.1122	0.275	-0.0653	0.2121	0.3157	-0.3247	0.1578	0.4092	-0.001	-0.1523	-0.0329	-0.0634	-0.1584	0.1725	-0.0422	-0.0789	-0.169	0.0747	1.0081	0.5805	0.8841	0.581	0.4483	0.209	0.4212	0.3684	0.1854	-0.0944	-0.1127	0.1558	-0.0842	0.1939	-0.0421	0.3275	0.6862	0.6228	0.0578	0.2905
BP0986	probable outer membrane lipoprotein	-0.8215	-1.1417	-0.5007	-1.4677	-0.9893	-0.8709	-1.0993	-1.3478	-1.2448	-0.0453	-0.0083	-0.0866	-0.2672	0.4864	0.0621	-0.2979	-0.4128	0.3232	-0.558	-0.7756	-2.0349	-2.2995	-2.6061	-1.8431	-0.8342	-1.4487	-1.0792	-1.1702	1.2276	0.5407	0.5374	1.286	0.6975	0.1286	0.5136	0.3183	0.6474	0.3162	0.0308	-0.3487	-0.6182	0.1693	-0.2373	0.6289	0.8841	1.2122	0.3097	-0.2216
BP0987	putative membrane protein	-0.0074	-0.2401	0.4494	-0.6879	-0.1771	-0.2285	-0.0632	-0.5771	-0.2249	0.2428	-0.1231	0.1366	0.2313	0.4999	-0.044	0.5498	-0.6595	0.456	-0.1947	-0.622	0.1236	-0.298	-0.3905	-0.2864	0.0157	0.094	0.0091	-0.6032	0.5169	-0.003	0.1367	0.6283	0.1081	-0.0507	0.5522	-0.239	0.2058	0.2834	0.0066	-0.3475	-0.2589	0.5859	-0.0795	0.331	0.7409	0.9799	0.2647	-0.4142
BP0988	putative exported protein	0.0191	0.2214	0.2317	0.3873	0.2809	-0.0521	-0.069	0.3303	0.188	-0.3357	0.2958	0.2747	-0.5156	0.3773	0.2861	0.0153	0.4417	0.2089	0.2253	0.6002	0.1751	0.5229	1.0117	0.5861	0.2921	0.3921	0.1641	0.5693	0.0949	0.1136	0.1027	-0.0219	0.15	0.549	0.3899	0.1347	0.1608	0.2124	0.1309	0.6261	0.5705	0.238	0.3619	0.4413	0.0572	0.1381	0.0036	0.647
BP0989	oligopeptidase A	-0.425	-0.1116	-0.2415	-0.1745	-0.0842	-0.1632	-0.6635	0.4945	0.4688	-0.6927	-0.0477	-0.0764	-0.0361	0.4466	-0.2711	0.4104	-0.1512	0.1927	-0.1942	-0.115	-0.3176	0.0112	0.2488	0.4337	-0.1034	-0.059	0.0235	0.3	-0.2303	-0.1083	-0.1853	0.4661	0.0374	0.249	0.2326	0.0974	-0.3179	-0.0051	0.1462	0.239	0.3304	-0.1214	0.424	-0.1699	0.3958	0.4449	-0.1374	0.4533
BP0990	FolD bifunctional protein [includes: methylenetetrahydrofolate dehydrogenase and methylenetetrahydrofolate cyclohydrolase]	0.1733	0.044	-0.3786	0.4477	0.0632	-0.1039	-0.3025	0.7686	0.4567	-0.2939	0.2756	0.3261	0.1933	0.3753	0.0808	-0.1524	0.668	0.0693	0.3042	0.2462	0.4032	0.1773	0.4833	0.7873	0.089	0.2178	0.2833	1.0721	-0.1086	-0.3045	0.3483	0.0588	0.4401	0.0463	0.2783	0.3082	0.1594	0.2448	0.1649	0.9746	0.3901	0.3734	0.632	0.0005	0.0984	-0.2427	0.5614	1.0289
BP0991	two-component response regulator	-0.3095	-0.0785	-0.3345	0.0051	-0.2666	-0.2272	-0.2127	0.352	-0.1041	-0.7693	-0.1359	-0.1785	0.1592	-0.1342	-0.2273	-0.5239	-0.0005	-0.2062	-0.1085	-0.483	-0.1696	-0.022	0.5111	0.3351	-0.2651	-0.1165	-0.078	0.1197	-0.8182	-0.5293	-0.3161	0.103	0.1534	-0.324	-0.0611	-0.0602	-0.2078	0.1269	-0.1495	0.2966	0.2564	-0.2291	-0.0598	0.1608	0.2063	0.1071	-0.4029	0.1884
BP0992	tw-component sensor kinase	-0.0085	-0.1083	-0.559	0.442	-0.0517	-0.2468	-0.3175	0.8332	0.2198	-0.8921	0.0937	0.0427	0.1966	0.1256	0.1196	-0.5794	0.4007	-0.17	-0.0565	-0.6211	0.0498	0.1213	0.4426	0.6425	-0.1343	0.0273	0.0471	0.601	-0.3176	-0.5973	-0.0455	0.2949	-0.0724	-0.5786	-0.0639	-0.1145	-0.206	0.0681	-0.0081	0.769	0.4181	0.1284	0.3055	0.1025	0.336	-0.0766	-0.2624	0.7441
BP0993	pyruvate dehydrogenase E1 component	-0.4188	-0.3725	-0.525	-0.2535	-0.2306	-0.1693	0.0571	0.309	-0.0283	-0.8269	-0.2935	-0.1386	-0.0974	0.1654	-0.1257	0.1963	0.0459	-0.2784	-0.3379	-1.0031	-0.2229	-0.34	-0.0304	0.2221	-0.152	-0.2446	-0.074	0.0814	-0.0048	-0.2759	-0.0212	0.368	-0.0803	-0.481	0.2313	-0.0795	-0.1044	0.1157	0.1299	0.3247	-0.0977	0.0841	0.0432	0.0898	0.4053	0.2014	-0.249	0.2526
BP0994	dihydrolipoamide acetyltransferase component of pyruvate dehydrogenase complex	-0.4823	-0.4094	-0.2995	-0.2015	-0.1658	-0.1651	-0.26	0.3337	0.2563	-0.6431	-0.1564	-0.3207	-0.1368	-0.1365	-0.1463	-0.1343	0.0832	-0.2588	-0.1785	-0.1948	-0.2543	-0.0719	0.2219	0.3569	-0.2315	0.0215	-0.0192	0.3492	-0.1438	0.0726	0.437	0.1067	0.0446	0.312	0.0954	0.051	-0.0376	0.2039	0.0428	0.3176	0.1509	-0.1236	0.3043	0.0466	0.191	0.3115	0.0111	0.358
BP0995	dihydrolipoamide dehydrogenase	-0.2269	-0.1415	0.0121	-0.2306	-0.2468	-0.0971	-0.0552	0.1492	0.0731	-0.3821	-0.2668	-0.1892	-0.0048	0.018	-0.128	-0.2979	-0.1321	-0.0326	-0.22	-0.6761	-0.1904	-0.0454	-0.0025	0.3933	-0.0762	-0.182	0.1527	0.0723	-0.0078	0.0107	0.0897	0.1661	0.1645	-0.0388	0.1506	0.0639	-0.22	0.0724	0.038	0.0505	0.0808	-0.0981	0.229	0.0005	0.3085	0.4703	0.0287	0.1185
BP0996	flagellin	-0.0699	-0.2902	-0.2238	-0.0848	-0.2655	-0.4003	-0.372	-0.203	-0.3007	-0.4151	0.0892	-0.0321	0.2079	0.1207	0.0701	0.2276	0.0452	-0.0123	0.0458	-0.5367	-0.335	-0.473	-0.0639	0.3942	-0.3617	-0.4871	-0.2679	0.1265	-0.1213	-0.3666	0.0005	0.0428	-0.1393	-0.458	0.2261	-0.184	-0.1037	-0.0904	-0.2521	0.2528	-0.1404	0.0768	-0.2108	-0.0766	0.5346	0.1427	-0.3101	0.263
BP0998	conserved hypothetical protein	0.1175	0.3439	0.4301	-0.1376	0.1967	-0.2028	-0.2292	0.1966	-0.1145	0.0296	0.2966	0.4592	0.2232	0.4022	0.0704	0.3163	-0.0491	0.3659	0.0589	-0.2272	0.1438	0.065	0.3284	0.1568	0.2635	0.5152	0.3228	-0.0408	0.021	-0.1792	-0.1046	0.1881	0.2029	0.3097	0.4438	-0.0172	0.183	0.3392	0.2568	0.1622	0.138	0.2257	0.4192	0.1703	0.2006	0.396	-0.0746	0.1738
BP0999	transketolase 1	-0.0396	-0.0414	0.3269	-0.1657	-0.053	-0.0948	-0.1391	-0.261	0.0418	-0.2273	0.2234	0.1527	0.118	0.2701	0.1086	0.1164	0.0049	0.2764	0.0543	0.0165	-0.0088	-0.1073	-0.2241	0.1066	0.0434	-0.0194	0.0854	0.0311	0.4077	0.1723	0.2101	0.1455	0.1109	0.328	0.2938	0.0884	0.1475	0.5151	0.1917	0.1397	0.0758	0.346	0.1806	0.0012	0.4457	0.4179	0.2067	0.1183
BP1000	glyceraldehyde-3-phosphate dehydrogenase	-0.0879	0.175	0.2159	-0.1031	-0.0164	-0.2456	-0.0113	-0.337	-0.3678	0.5028	0.3162	0.0093	0.2977	0.3073	-0.0188	0.3234	-0.2021	0.1524	0.1953	-0.8381	-0.1396	-0.6178	-0.7048	0.1138	-0.0551	-0.3564	-0.1064	-0.2292	0.4896	0.5286	0.5531	0.344	0.3407	-0.813	-0.0243	0.2399	-0.0478	0.1828	-0.0549	-0.091	-0.2834	0.5772	0.0131	0.1843	0.5254	0.3699	0.5158	0.1187
BP1001	phosphoglycerate kinase	-0.1059	-0.2621	0.3974	-0.4305	-0.0864	-0.1097	-0.0998	-0.224	-0.1979	-0.3844	0.2678	-0.012	0.1012	0.0479	-0.0072	0.1771	-0.1128	0.1335	-0.0412	0.1455	-0.078	-0.1398	0.0067	0.2057	-0.142	0.0053	-0.008	-0.0555	-0.346	-0.0473	0.3068	0.27	0.0321	0.2801	0.2781	0.0726	0.0665	0.2802	0.1544	0.1827	0.0045	0.1499	0.0045	0.3124	0.3192	0.806	0.1533	0.3199
BP1002	enoyl-[acyl-carrier-protein] reductase [NADH]	0.191	0.5716	0.3684	-0.1962	0.0523	0.0349	0.0749	-0.3644	-0.4017	-0.2478	0.3027	0.147	0.0711	0.3237	0.378	0.0589	0.0765	0.3951	0.0698	-0.2499	-0.0061	0.0717	0.1621	0.231	0.2929	0.359	0.4913	0.4617	0.5047	0.1878	0.2807	0.6011	0.4328	0.245	0.4673	0.2458	0.3037	0.4351	0.1492	0.2082	0.165	0.3439	0.1628	0.5275	0.8276	0.8459	0.2099	0.2348
BP1003	acetate kinase	-0.0554	-0.186	0.1064	-0.0677	0.0443	-0.092	-0.0308	0.1891	-0.0504	0.1847	0.167	0.1526	0.2011	0.432	0.3906	-0.317	0.4522	0.4147	0.3429	-0.1925	0.2259	0.2656	0.2603	0.4442	0.4114	0.4092	0.6047	0.6006	0.4191	0.386	0.4504	0.8648	0.5947	-0.0035	0.2867	0.3169	0.3331	0.4505	0.307	0.4179	0.2982	0.3841	0.2926	0.6133	0.614	0.7565	0.4794	0.599
BP1004	phosphate acetyl/butaryl transferase	-0.0288	-0.0982	-0.486	0.1332	0.0179	-0.0777	-0.1085	0.48	0.057	-0.6583	0.2184	0.0937	0.2134	0.4153	0.3548	-0.3689	0.6512	0.2437	0.1558	0.0035	0.1626	0.2483	0.5773	0.6953	0.2674	0.3255	0.5107	1.0007	0.3831	0.1371	0.5088	0.8351	0.7208	0.0538	0.3408	0.5027	0.2883	0.3332	0.0401	0.7858	0.3609	0.6005	0.4157	0.6854	0.6772	0.2834	0.3121	0.8353
BP1005	conserved hypothetical protein	-0.3347	-0.3808	-0.8992	-0.0294	-0.3667	-0.5612	-0.2899	0.2786	-0.3369	-1.0396	-0.1312	-0.1137	0.0171	0.1614	0.0145	-0.4691	0.4165	-0.0447	-0.121	-0.6443	-0.1326	-0.1467	0.1239	0.4649	-0.0236	0.0385	0.1485	0.7067	0.0735	-0.1244	0.2666	0.9163	0.0997	-0.3903	-0.0657	0.2942	0.0748	0.2824	-0.0363	0.6889	-0.0243	0.2876	-0.0214	0.7388	0.8072	0.5183	-0.2732	0.6248
BP1006	probable glutathione S-transferase	-0.2348	-0.4091	-0.2599	-0.4543	-0.2876	-0.7088	-0.8274	-0.355	-0.3512	-0.6693	-0.2861	-0.0411	-0.3145	0.0415	-0.3143	-0.6741	-0.3391	-0.1418	-0.3759	-0.844	-0.1988	-0.898	-0.4553	-0.1342	-0.2225	-0.2597	-0.0435	-0.2562	0.0643	-0.3984	-0.4321	1.2553	-0.1798	-0.5747	0.2037	-0.2597	-0.4366	-0.3384	-0.3101	-0.1657	-0.6152	0.0867	0.0542	0.1288	1.0119	0.9875	-0.4054	-0.223
BP1007	transposase (Pseudogene)	-0.6748	-0.2447	-1.0633	-0.6216	-0.3624	-0.4842	-0.5442	-0.6195	-0.892	-0.9912	-0.759	-0.2163	-0.5793	-0.6471	-0.4755	-0.2817	-0.674	-1.0109	-0.9812	-0.9768	-0.8688	-0.6017	0.1163	-0.3051	-0.6985	-0.2005	-0.7963	-0.2992	-0.304	-0.6257	-0.6963	0.1202	-0.2984	-0.6908	-0.3452	-0.717	-0.1824	-0.3661	-0.4958	-0.5303	-0.5519	-0.6176	-0.8527	-0.2723	-0.0836	-0.2614	-0.235	-0.6032
BP1008	conserved hypothetical protein (Pseudogene)	-0.2079	0.215	-0.1852	0.1646	-0.2653	-0.0353	-0.1934	0.0884	0.0573	-0.3811	-0.1273	0.0821	0.1556	0.1735	0.0861	0.1918	0.3155	0.0031	0.028	-0.4812	-0.0076	-0.0183	0.5871	0.5322	0.1005	-0.0213	0.1818	0.4373	0.2037	-0.3245	0.3831	0.5617	0.0385	-0.4937	-0.0269	-0.1035	0.0598	0.1074	-0.1027	0.3415	0.0901	0.2085	0.1333	0.1579	0.5479	0.4163	-0.2014	0.4613
BP1009	conserved hypothetical protein	0.3821	-0.3038	-0.9053	-0.3573	0.1041	-0.6516	-0.9275	-0.0833	-0.5474	-0.6388	0.3506	0.2993	-0.1382	0.0838	0.5624	0.3849	0.4089	-0.3379	-0.2895	-0.5362	-0.3566	-0.6396	0.024	0.2667	-0.2611	-0.3151	-0.2836	0.0186	0.1636	-0.5682	0.0383	0.3931	-0.2827	-0.1494	0.1825	-0.0424	-0.1789	-0.3207	-0.5005	-0.0042	-0.5506	0.3794	-0.2662	-0.32	0.7964	0.3285	-0.3372	-0.0335
BP1010	putative acetyltransferase	0.1064	0.0777	-0.2873	-0.0238	0.0514	-0.2701	-0.3637	0.3496	0.157	-0.5735	0.3922	0.2407	0.1561	0.2485	0.231	-0.5013	0.3566	-0.092	-0.0521	0.1127	-0.0687	-0.1669	0.3639	0.4444	0.0148	0.2412	0.2184	0.2447	0.1056	-0.2133	0.3528	0.4155	0.154	0.144	0.2661	-0.0081	-0.1509	0.1334	-0.1363	0.3701	0.105	0.253	0.2114	0.0805	0.7649	0.6011	-0.1391	0.4115
BP1011	curved DNA-binding protein	-0.4362	-0.5059	-0.1681	-0.5433	-0.3192	0.0674	0.0775	0.1689	0.0593	-0.5404	-0.1437	-0.2786	-0.0117	-0.0881	-0.5421	-0.0272	-0.4965	-0.1022	-0.46	-0.5081	-0.6926	-0.4992	-0.32	0.2135	-0.5487	-0.4591	-0.3278	-0.1804	-0.3162	-0.1853	-0.0788	0.7779	-0.1287	-0.2989	-0.0852	-0.2788	-0.4644	0.0343	-0.2461	-0.4271	-0.0704	-0.3096	0.0677	0.0544	0.8692	0.9962	-0.255	-0.0669
BP1012	conserved hypothetical protein	-0.2607	-0.3083	0.2085	-0.7615	-0.1461	-0.5598	-0.2295	-0.1295	0.0197	-0.3988	-0.0661	-0.241	-0.2339	-0.1116	-0.5941	-0.0004	-0.6247	-0.112	-0.4312	-0.6138	-0.6089	-0.5979	-0.1849	-0.1368	-0.3029	-0.321	-0.2898	-0.5749	-0.2575	-0.3514	-0.0959	0.5014	-0.3174	-0.1377	0.0445	-0.3956	-0.5483	-0.2288	-0.187	-0.5593	-0.1681	-0.3439	0.0208	-0.0652	0.5931	0.9463	0.0315	-0.3772
BP1013	putative membrane protein (pseudogene)	-0.2145	0.2	0.2611	-0.0579	0.0526	-0.1746	-0.3111	0.0958	0.6185	-0.2848	-0.1514	0.1418	-0.0518	0.3739	-0.0609	0.7183	0.0223	0.4735	-0.1294	-0.0876	0.0444	0.2478	0.0244	0.4101	0.1769	0.1879	0.08	0.3722	0.3655	0.2262	0.1106	0.3906	0.1432	0.1558	0.3233	-0.0067	0.1253	0.3982	-0.0569	0.2959	0.3426	0.1787	0.5389	0.214	0.2948	0.4263	0.0409	0.3016
BP1014	probable phosphate transporter	0.5243	-0.0917	-0.0537	0.2274	0.1275	0.1837	-0.4179	-0.0018	-0.0979	-0.0221	0.4869	0.6339	0.2653	0.3759	0.6159	0.0814	0.5671	0.315	0.3293	0.4792	0.0891	0.085	0.4741	0.4329	0.2498	0.3431	0.3975	0.2249	0.3178	0.0878	0.2427	0.1454	0.406	0.5431	0.4678	0.2903	0.1775	-0.0328	0.0212	0.3097	0.1334	0.6033	0.0716	-0.2881	0.5309	0.3803	-0.1779	0.2317
BP1015	molybdopterin biosynthesis protein	-0.2662	0.0127	0.1434	-0.0329	-0.185	-0.3329	-0.4767	-0.0362	-0.1263	-0.2515	0.1271	0.1522	0.1382	0.3073	-0.0711	0.0639	-0.1154	0.2355	-0.0673	-0.0362	-0.1426	-0.3217	-0.2595	0.1218	0.1211	0.0043	0.2111	0.1561	0.2405	0.1067	-0.0105	0.517	0.12	0.2233	0.319	0.1343	-0.0853	0.0429	0.1436	0.254	-0.2811	0.3171	0.121	0.2592	0.4067	0.7637	-0.0157	0.1515
BP1016	putative exported protein	0.0273	0.2494	0.177	0.0882	-0.2101	-0.3374	-0.7496	-0.0626	-0.1617	-0.2899	-0.2387	0.1382	-0.1767	0.2586	-0.0416	0.323	-0.0516	0.0159	-0.0696	-0.177	0.0405	-0.1694	-0.0582	0.2857	0.1498	0.2089	0.0668	0.228	0.0551	-0.078	-0.2366	0.3752	0.1396	-0.0567	0.1646	-0.0823	0.1102	-0.0473	0.1146	0.2211	-0.1037	0.3506	0.1783	0.0571	0.3784	0.3581	-0.2411	0.165
BP1017	putative peptidase	0.0625	0.2942	0.1485	-0.2697	0.1794	-0.1607	-0.3028	-0.4941	-0.4231	-0.0475	0.2448	0.2223	0.0771	0.2481	-0.0442	-0.9599	-0.1177	-0.0713	-0.0522	-0.0207	-0.1545	-0.0579	0.0193	0.1935	0.14	0.0221	0.003	-0.1128	0.3668	0.0548	0.3332	0.3885	0.1836	0.1506	0.1087	0.0711	0.0218	0.2199	-0.2797	-0.24	-0.1513	0.1389	-0.0453	0.2482	0.3364	0.4733	-0.0721	-0.1134
BP1018	hypothetical protein	0.0865	0.164	0.0691	-0.1661	-0.1719	-0.5089	-0.5972	-0.4476	-0.4514	-0.1477	-0.0331	-0.0322	0.0552	0.2273	0.0267	-0.2779	-0.1777	-0.0633	-0.2257	-1.0791	-0.1879	-0.6567	-0.4074	0.1577	-0.0694	-0.4992	-0.0762	-0.1619	0.25	-0.0146	0.2113	0.6269	-0.1728	-1.0227	0.1212	-0.2401	-0.0065	0.0177	0.0053	-0.1282	-0.398	0.1803	0.0298	0.0432	0.8266	1.0172	-0.197	-0.1436
BP1019	translation initiation factor IF-1	0.0711	-0.0444	-0.3661	0.4047	-0.104	-0.213	-0.2292	0.4265	0.0428	-0.3887	0.229	0.1407	0.3586	0.0785	-0.048	-0.3531	0.2412	-0.279	-0.2204	-0.4919	-0.1334	-0.1041	0.0877	0.4109	-0.1632	-0.0936	0.1335	0.3538	0.2169	-0.1551	0.3813	0.8341	-0.0297	-0.5545	-0.0701	-0.1415	-0.2832	-0.1559	-0.2481	0.3354	-0.0716	0.064	-0.0654	0.2275	0.7618	0.4487	-0.1168	0.5107
BP1021	RNA polymerase sigma factor for flagellar operon	-0.0338	-0.5659	-0.5192	-0.3229	-0.0191	-0.8982	-1.3331	-0.4924	-0.3078	-0.5826	0.08	0.4245	-0.0736	0.1421	0.1561	-0.3059	0.0823	-0.4076	-0.0181	-0.7028	-0.3224	-0.7855	-0.2387	0.0887	-0.3401	-0.6535	-0.366	-0.4479	-0.0238	-0.3265	-0.2131	0.1154	0.0332	-0.4156	0.2009	0.0174	-0.2722	-0.6908	-0.3002	-0.1529	-0.6093	0.1886	-0.1065	-0.624	0.4606	0.5975	-0.1448	0.0089
BP1022	flagellar transcriptional activator FlbB	-0.3179	-0.4093	-0.3314	-0.4186	-0.284	-0.4028	-0.6967	-0.4071	-0.521	-0.5657	-0.1674	-0.2117	-0.0544	-0.4416	-0.3452	-0.1856	-0.4988	-0.5365	-0.5437	-0.1846	-0.4756	-0.3259	-0.2481	-0.0482	-0.7066	-0.8283	-0.4292	-0.2987	-0.5921	-0.4596	-0.4579	0.5258	-0.4779	-0.2835	-0.3302	-0.3562	-0.5252	-0.3848	-0.2426	-0.3097	-0.2261	-0.3389	-0.2787	0.0683	1.0272	1.1038	-0.4139	-0.2338
BP1023	flagellar transcriptional activator FlhC	-0.2229	-0.1931	-0.4742	-0.3075	-0.2936	-0.7359	-0.8436	-0.2812	-0.2995	-0.504	-0.251	-0.2706	-0.3522	-0.2074	-0.4701	-0.1828	-0.4317	-0.3724	-0.5416	-0.3916	-0.3587	-0.6843	-0.2411	0.1618	-0.5964	-0.6701	-0.5526	-0.1545	-0.5236	-0.7396	-0.5145	0.4361	-0.5347	-0.5081	-0.2961	-0.6456	-0.5631	-0.355	-0.8975	-0.3899	-0.3577	-0.2955	-0.2199	-0.1488	0.5311	0.4513	-0.1985	-0.3336
BP1024	chemotaxis protein MotA	0.1526	-0.2083	-0.3246	-0.6625	-0.0711	-0.292	-0.5774	-0.5508	-1.2845	-0.2132	-0.1326	-0.1285	-0.2105	-0.134	0.0746	0.046	-0.3155	-0.3643	-0.4984	-0.0322	-0.9354	-0.3217	0.1611	0.1571	-0.2722	-0.6112	-0.4115	-0.5027	-0.1333	-0.2149	-0.1038	0.2195	-0.309	-0.0278	-0.2201	-0.2612	-0.1479	-0.4794	-0.6688	-0.5474	0.065	-0.0554	0.0305	-0.1429	0.6946	0.4853	-0.3158	-0.1304
BP1025	chemotaxis protein MotB	-0.1213	-0.0316	-0.3518	-0.1445	-0.5344	-0.6819	-0.7158	-0.1037	-0.3127	-0.665	-0.0119	0.0291	-0.3536	-0.3011	-0.1244	0.7697	0.0476	-0.4677	-0.2797	-0.306	-0.0645	-0.225	-0.1186	0.214	-0.2438	-0.4268	-0.3513	0.0297	-0.2505	-0.7438	-0.3415	0.0053	-0.3104	-0.0517	0.0447	-0.2894	-0.4929	-0.4064	-0.7881	-0.086	-0.3281	0.0429	0.0345	0.0006	0.2266	-0.0532	-0.7916	0.2504
BP1026	chemotaxis protein CheY (Pseudogene)	-0.0522	0.195	0.6004	-0.2585	-0.1523	-0.1679	0.0079	-0.2364	-0.4693	-0.7376	0.4023	0.2212	0.2074	-0.1065	0.0285	-0.1237	0.3202	-0.3034	-0.324	0.1624	-0.4554	0.0226	0.8313	0.5322	-0.1491	0.1086	-0.0259	0.0762	-0.4048	-0.4599	0.8337	0.0097	-0.398	0.1663	-0.1484	-0.3982	0.107	0.1759	0.2218	0.2147	0.3782	-0.1121	-0.4804	0.1972	0.3388	0.5188	-0.0431	0.3452
BP1028	chemotaxis protein CheA	-0.0849	-0.4965	-0.5502	-0.4236	-0.5013	-0.4474	-0.4635	-0.2872	-0.5061	-0.608	0.0169	0.2956	0.0502	-0.0592	0.3081	0.5134	-0.1129	-0.4598	-0.3801	-0.4816	-0.2961	-0.0866	-0.3097	-0.0644	-0.5473	-0.2233	-0.6064	-0.2559	-0.0783	-0.4278	0.1868	0.158	-0.7947	-0.1688	0.3185	-0.5232	-0.3063	-0.7008	-0.8264	0.1691	-0.8432	0.107	-0.2813	-0.718	0.4879	0.7662	-0.2044	-0.3211
BP1029	chemotaxis protein CheW	0.259	0.3642	-0.4343	-0.2706	0.1085	-0.1767	-0.0883	-0.1011	-0.3387	-0.0168	1.0184	0.2852	-0.0012	0.3682	0.5761	0.0226	0.0293	-0.1969	-0.0137	-0.0904	-0.3507	0.0206	0.2697	0.4051	-0.0987	-0.6261	-0.6572	-0.1498	0.1701	-0.4687	0.0611	0.3392	0.0542	0.126	0.4488	0.1753	-0.2246	-0.3415	0.1138	-0.1006	0.2414	0.6004	-0.1907	-0.2542	0.5933	0.591	-0.1513	-0.0163
BP1030	methyl-accepting chemotaxis protein I	0.0992	-0.1809	-0.2177	-0.0862	-0.1585	-0.0671	-0.3348	-0.0266	-0.0875	-0.7224	0.4728	-0.0021	0.1985	0.0816	0.3776	0.4362	0.2253	-0.1439	-0.1235	-0.2187	0.201	0.1187	0.2012	0.5871	-0.1077	0.0737	-0.0432	0.3958	-0.1866	0.0304	0.5207	0.4106	0.1656	-0.1722	0.2229	0.1881	0.0711	0.0961	0.0212	0.4374	-0.0663	0.0969	0.28	0.0829	0.5041	0.7042	-0.0828	0.4488
BP1031	chemotaxis protein methyltransferase (Pseudogene)	0.098	-0.7612	-0.3648	-0.673	0.0509	-0.7165	-1.1184	-1.3025	-0.582	-0.0171	0.3583	0.5419	-0.0558	0.2873	0.5014	0.5007	0.1398	-0.3405	-0.3937	-0.3003	-0.243	-0.2681	0.0337	0.2869	-0.3143	-0.5575	-0.6555	-0.4415	0.2825	-1.0407	0.0594	0.3346	-0.1144	0.1949	0.2084	-0.3242	-0.4779	-0.5717	-0.2937	-0.4337	-0.5598	0.3191	-0.2995	-0.3704	0.8424	1.0633	-0.1814	-0.8261
BP1032	protein-glutamate methylesterase	0.1649	0.1664	0.0291	-0.2591	0.0074	-0.4305	-0.2509	-0.4125	-0.0953	-0.0606	0.491	0.2763	0.2335	0.1512	-0.0655	-0.115	-0.0966	0.3202	0.0498	0.1319	0.1694	0.1084	0.4909	0.2008	0.1168	0.2844	0.271	-0.0516	-0.0642	-0.0284	0.7177	0.0575	0.3272	-0.0017	0.413	0.2078	0.4063	0.4963	-0.1118	-0.068	0.2883	0.466	0.3741	0.513	0.5536	0.4833	0.3134	-0.0688
BP1033	chemotaxis protein CheY	-0.0423	0.4287	-0.0315	0.3842	0.0326	-0.5706	-0.0996	0.2582	-0.1841	-0.2596	0.1466	-0.0601	0.105	-0.0023	-0.1661	-0.1309	0.0397	0.0175	-0.0061	-0.3172	0.0149	0.3078	0.1175	0.5352	0.1475	0.0825	0.0106	0.4699	-0.4232	-0.3387	-0.2716	0.2426	0.0678	-0.1541	0.0089	-0.0266	0.0331	0.3895	-0.0559	0.6832	0.385	0.0828	0.1168	0.3072	0.4415	0.5226	-0.0362	0.7894
BP1034	chemotaxis protein CheZ	0.1672	0.0006	0.2051	0.1796	-0.0865	-0.134	-0.1336	-0.342	-0.1508	-0.1011	0.1824	0.4313	0.1689	0.3402	0.0811	1.2476	0.1248	0.4333	-0.1311	-0.4361	0.1328	-0.2859	-0.009	0.3398	0.2269	0.3214	0.1169	-0.0725	0.0739	-0.2806	0.206	0.4276	0.0467	-0.0838	0.3545	-0.0159	-0.0935	0.299	0.1437	0.0575	0.4472	0.6822	0.452	0.5055	0.5851	0.3733	0.1418	-0.1417
BP1036	putative aldo/keto reductase	0.6232	-0.2206	1.4189	-0.6601	-0.1726	-0.4334	-0.2383	-0.737	-0.7201	-0.8297	1.4169	-0.4987	0.6662	-0.5504	0.0424	-0.2614	-0.6492	-0.0288	-0.3724	0.5589	-0.83	-0.9939	-0.4111	0.0039	-0.453	0.5422	-0.1517	-0.2978	-0.6699	-0.2985	0.9793	-0.3488	-0.801	0.7977	0.2817	-0.5456	-0.1621	0.1019	0.3641	-0.5336	-0.7778	-0.4665	-0.6051	0.1899	-0.0209	1.95	0.4506	-0.0036
BP1037	putative apolipoprotein N-acyltransferase (Pseudogene)	0.1202	0.3194	0.1077	0.1844	-0.0317	-0.4316	-0.4799	-0.2893	-0.2917	-0.1951	0.0604	0.3537	0.0713	0.3618	0.2651	-0.2636	0.2208	0.0961	0.189	-0.7575	0.0277	-0.1782	-0.0919	0.2522	0.2298	-0.2259	0.4275	0.2811	-0.0256	-0.3817	-0.0389	0.472	0.102	-0.4613	0.2266	-0.0407	0.2297	0.0571	-0.0492	0.0414	-0.1342	0.3797	0.0824	0.1728	0.3945	0.3903	0.009	0.0945
BP1038	magnesium and cobalt efflux protein	0.5531	0.1065	-0.0084	-0.1996	-0.1248	-0.5574	-0.4527	-0.4426	-0.8106	-0.1436	0.253	0.0606	0.4586	0.1761	0.0141	0.4479	-0.0584	-0.1695	0.0043	-0.5924	-0.1442	-0.5307	-0.841	-0.0869	-0.185	-0.4099	-0.1098	-0.0825	-0.282	-0.2592	-0.3289	0.8626	-0.0011	-0.407	-0.0613	0.0437	-0.065	-0.2511	-0.2643	-0.1776	-0.5747	0.1223	-0.3433	0.0355	0.9633	0.5466	-0.3193	-0.0801
BP1039	conserved hypothetical protein	0.0935	-0.0008	0.2116	0.0978	0.1409	-0.0435	-0.2613	0.1394	-0.123	-0.2245	0.2345	0.2564	0.0775	0.1914	0.2579	-0.0972	0.3127	0.2529	0.0178	0.0637	0.1003	0.0831	0.351	0.4735	0.2691	0.3076	0.2381	0.5703	0.0948	-0.0654	0.2875	0.3492	0.064	0.0851	0.27	0.0909	-0.0203	0.1346	0.1422	0.5815	0.1739	0.3048	0.1249	0.2391	0.4902	0.5455	0.2161	0.485
BP1040	PhoH-like protein	-0.0777	0.1946	0.3651	-0.0113	0.0201	0.0251	-0.4064	-0.161	-0.0777	-0.2673	0.0314	0.0765	0.0481	0.2638	0.0654	0.215	0.1391	0.081	0.0615	-0.4976	0.1048	-0.3305	-0.2479	0.2221	0.0602	0.0774	0.1337	0.2157	0.1316	-0.1787	0.0039	0.3338	-0.064	-0.3929	0.1015	-0.0986	0.1041	0.1102	-0.0388	0.1809	-0.1825	0.2123	0.1607	0.0171	0.4556	0.5641	-0.0625	0.0365
BP1041	conserved hypothetical protein	-0.0274	-0.2501	0.0087	0.0234	0.0148	0.0239	0.0988	0.2432	-0.165	-0.4161	0.2054	0.1587	0.2613	0.2502	0.0075	0.291	0.1418	0.0701	0.3003	-0.0461	-0.0068	-0.1705	-0.0267	0.3139	0.1167	0.0964	0.1345	0.324	-0.1529	-0.2314	-0.1783	0.2081	0.3873	0.0351	0.2618	0.0266	0.1192	0.3565	0.0782	0.277	0.0814	0.1077	0.0127	0.0003	0.2431	0.0851	-0.2381	0.3717
BP1042	putative membrane protein (Pseudogene)	-0.0855	-0.0949	0.0888	-0.1532	-0.061	-0.3541	-0.3459	-0.1885	-0.0078	-0.3291	-0.0521	0.0184	0.0729	0.4006	0.2736	0.052	0.0736	0.2595	0.0072	0.1204	0.2465	0.1678	0.1477	0.2192	0.2918	0.2135	0.5598	0.3988	-0.5311	-1.1721	-0.7734	-0.1354	0.0374	0.2977	0.2935	-0.0338	0.2677	0.0673	0.0575	0.2638	0.0888	0.3119	0.4496	-0.1307	0.0195	0.1787	0.1336	0.2704
BP1044	transposase for IS1663	0.2148	0.0879	0.5437	-0.5016	0.1266	-0.4431	-0.5654	-0.8362	-0.3168	0.0326	0.0143	0.5183	0.2372	0.4047	0.0174	0.5374	-0.4352	0.2056	-0.1743	-0.3055	0.088	-0.3431	-0.302	-0.2004	-0.0513	-0.1334	0.1703	-0.4818	-0.2645	-1.0057	-0.8964	0.5328	0.0738	0.2217	0.4114	-0.2446	-0.0507	0.0642	-0.0964	-0.2667	-0.3057	0.2884	0.2629	0.0704	0.8575	0.8713	-0.1183	-0.3966
BP1045	protein-export membrane protein	0.0369	-0.0132	-0.5023	0.3371	0.0303	-0.3603	-0.472	0.5274	0.151	-0.5079	-0.1647	0.1674	-0.1256	0.1732	0.3192	0.4377	0.619	0.1441	0.2276	0.4065	0.0104	0.2474	0.8803	0.8085	0.2204	0.3085	0.2572	0.7644	-0.5732	-0.723	-0.2287	0.5902	0.3586	0.4338	0.3292	0.1606	0.3133	0.4682	0.2234	0.9708	0.3289	0.1483	0.1893	0.2441	0.3885	0.1332	0.2428	0.915
BP1046	protein-export membrane protein	0.0231	-0.0411	-0.4839	0.2585	-0.1256	-0.29	-0.307	0.3995	0.0223	-0.3492	-0.0669	0.0816	0.1394	0.2113	0.2792	0.1555	0.5429	0.1208	0.33	0.3687	0.0146	0.3498	0.7781	0.5671	0.1249	0.181	0.44	0.8861	-0.5288	-0.425	-0.4881	0.1519	0.4254	0.3543	0.1858	0.3341	0.349	0.4605	0.3022	0.8743	0.4903	0.3027	0.2554	0.1267	0.4237	0.236	0.1849	0.5653
BP1047	putative secreted protein	0.2008	0.1455	0.0839	0.2344	0.122	0.133	0.0039	0.2583	0.1299	-0.0747	0.0756	0.3607	0.1341	0.453	0.2731	0.05	0.2427	0.3653	0.0681	-0.0503	0.2904	0.1761	0.2681	0.3755	0.3399	0.6136	0.3031	0.5971	0.1183	-0.2687	-0.0749	0.1885	0.3583	-0.0233	0.2901	0.0309	0.1649	0.2002	0.1599	0.3506	0.2324	0.5386	0.4138	0.0025	0.201	0.2131	0.2015	0.325
BP1049	queuine tRNA-ribosyltransferase	-0.0577	0.0053	0.0764	-0.0317	-0.2672	-0.4928	-0.558	-0.3062	-0.369	-0.4023	0.0253	0.0293	0.0413	0.2173	0.237	0.2617	0.1235	0.0617	0.1042	-0.5554	-0.0177	-0.1519	0.3291	0.3674	0.2173	0.043	0.5092	0.2332	-0.1088	-0.274	-0.0135	-0.0199	0.0533	-0.1997	0.2378	0.1503	0.1172	0.2337	0.1899	0.099	0.0157	0.2154	0.0748	0.0495	0.2537	0.2694	-0.1039	0.1565
BP1050	S-adenosylmethionine:tRNA ribosyltransferase-isomerase	0.2905	0.0365	0.3653	-0.0778	-0.276	-0.4391	-0.5518	-0.1115	-0.1104	-0.4075	0.1217	0.1471	0.0031	0.223	0.1397	-0.1412	0.1189	0.1336	-0.0828	-0.289	-0.0378	-0.0218	-0.0439	0.3834	0.2641	0.3551	0.3464	0.2487	0.0845	-0.3457	0.443	0.2567	0.0051	-0.1327	0.3805	-0.0988	0.1037	0.0266	0.0888	0.131	0.0903	0.3508	0.1291	0.0398	0.4635	0.7902	0.1349	0.2533
BP1051	probable D-alanyl-D-alanine carboxypeptidase	0.0291	0.0809	0.1967	0.1069	0.1981	-0.2064	-0.2182	-0.1312	-0.0533	-0.1719	-0.0454	0.0506	0.0308	0.3126	0.0179	-0.0468	0.0711	0.1966	0.0493	-0.2613	0.0732	0.1715	0.2761	0.5772	0.1954	0.0964	0.2548	0.2064	-0.3508	-0.5852	-0.2243	0.4428	0.1537	-0.265	0.4109	-0.0115	0.2733	0.1143	0.1053	0.3888	0.429	0.296	0.4606	0.3759	0.5114	0.701	0.1167	0.3742
BP1052	uracil phosphoribosyltransferase	0.0508	0.0431	0.2413	0.1072	-0.0973	-0.2896	-0.4203	0.2618	0.0862	-0.2844	-0.071	0.2971	0.2082	0.3789	0.1799	-0.0612	0.3538	0.3891	0.4288	-0.4847	0.1454	0.0321	0.0376	0.551	0.3019	0.2724	0.2914	0.494	-0.2072	-0.2589	-0.3208	0.102	0.3108	-0.1593	0.4148	0.1512	0.2896	0.1772	0.2964	0.6323	-0.0255	0.3793	0.3195	0.0506	0.4146	0.0698	-0.0098	0.5163
BP1054	pertactin precursor	-0.4079	-0.6026	0.1054	-0.401	-0.2295	0.715	0.9761	1.2393	1.4571	-0.2231	0.2547	0.1367	0.2368	0.2488	-0.031	0.1485	-0.0747	-0.1199	-0.3135	-0.3817	0.1872	-0.5	0.415	0.5276	-0.3818	-0.1702	-0.1596	-0.1794	0.8248	0.6163	1.0814	0.2932	0.0124	0.2704	0.3933	-0.1242	-0.0971	0.1127	0.4551	0.2728	-0.2955	-0.0794	0.1235	-0.0398	0.3024	0.8174	0.3111	0.1831
BP1055	siroheme synthase	-0.1831	-0.2233	0.2802	-0.2059	0.0258	0.3474	0.477	0.3564	0.5422	-0.0247	0.1237	0.1881	-0.1995	0.3127	-0.2244	-0.3661	-0.1021	0.6733	0.1383	0.1254	0.3175	-0.2012	0.0669	0.4265	0.9256	1.0016	0.7379	0.6043	-0.2021	-0.5542	-0.5874	-0.4699	0.7833	0.3832	0.45	0.0625	0.5822	0.6825	0.1346	0.2154	-0.2764	0.4989	0.4416	-0.5175	-0.1178	0.0393	0.5077	0.1435
BP1056	putative membrane protein	-0.1294	-0.1917	-0.2154	-0.1757	-0.2498	-0.5239	-0.5183	0.0456	-0.2943	-0.4183	-0.0952	-0.11	0.0321	0.1325	-0.0917	-1.3634	0.0818	0.09	0.0699	-0.3789	-0.425	-0.3877	0.1793	0.4597	-0.0671	-0.0832	0.2444	0.4309	-0.652	-0.7446	-0.5973	0.3783	0.0583	-0.143	0.2353	-0.0585	0.1594	0.3078	0.0521	0.6235	0.002	0.1397	-0.131	0.3969	0.5245	0.3372	0.2563	0.6544
BP1057	putative membrane protein	-1.0351	-0.6117	-0.5747	-0.8756	-0.9204	-1.2499	-1.1724	-0.7436	-0.7751	-0.7015	-0.5078	-0.4664	-0.0762	-0.2198	-0.4255	-0.4936	-0.4244	-0.7231	-0.9679	-2.3445	-0.6776	-1.2094	-0.6086	-0.0638	-0.8502	-0.6767	-0.3666	-0.6531	0.0093	0.031	0.4021	1.3089	-0.7694	-1.8105	-0.6836	-0.7297	-0.7825	-0.7997	-0.9348	-0.8702	-1.0386	-0.0142	-0.902	0.8934	0.8906	1.3626	-0.6843	-0.8826
BP1058	putative membrane protein	-0.109	-0.7895	-0.4303	-1.1711	-0.7906	-1.1849	-1.288	-0.8281	-0.6219	-0.6529	-0.8316	-0.3571	-0.2103	-0.5904	-0.5695	-0.0162	-0.9008	-0.3471	-1.0144	-1.2452	-0.7637	-0.9251	-0.8322	-0.4937	-0.8833	-1.0373	-0.0854	-0.7232	-0.0838	-0.1664	-0.0367	1.4461	-0.5662	-0.6909	-0.514	-0.6202	-0.8318	-0.9626	-0.941	-1.1596	-1.0588	-0.4489	-0.6693	0.7695	1.257	1.4692	-0.8752	-1.0144
BP1059	hypothetical protein	-0.4542	-0.5723	0.0445	-0.8713	-0.4642	-0.7462	-0.7343	-0.573	-0.379	-0.3617	-0.1559	-0.0366	-0.2491	-0.2675	-0.2205	-0.1207	-0.5381	-0.3056	-0.7282	-0.4995	-0.6718	-0.8906	-0.4619	-0.3851	-0.4802	-0.7702	-0.1075	-0.4181	0.1998	0.0382	0.3443	1.2456	-0.3939	-0.2417	-0.1407	-0.4191	-0.372	-0.579	-0.4696	-0.7299	-0.7642	-0.0891	-0.3837	0.8956	1.1323	1.5014	-0.2957	-0.7537
BP1060	3-octaprenyl-4-hydroxybenzoate carboxy-lyase	-0.0689	0.1339	-0.3692	0.2337	-0.1004	-0.4619	-0.4467	0.2718	-0.1473	-0.6127	0.0254	0.1309	0.2023	0.0388	0.0105	0.2464	0.3605	-0.1654	-0.1009	-0.5866	-0.1924	-0.3768	0.1211	0.3907	-0.0219	-0.2085	0.146	0.3665	-0.0758	-0.382	-0.1345	0.2125	-0.1915	-0.192	0.0538	-0.1467	-0.0383	0.0796	-0.0895	0.5417	-0.106	0.1878	0.0429	-0.0079	0.358	0.1184	-0.1379	0.4947
BP1061	putative transglycosylase	0.1113	0.3291	0.758	-0.1132	0.2006	0.3295	0.4519	-0.1766	0.0443	0.2901	0.3439	0.1747	0.5722	0.5955	0.3903	-0.0388	0.0105	0.6953	0.2028	-0.0721	0.2752	0.1996	-0.136	0.3262	0.4822	0.1628	0.6384	0.2862	0.3349	-0.0046	0.2076	-0.1314	0.4174	0.3673	0.5017	0.2517	0.4736	0.5263	0.6129	0.2143	0.3676	0.4228	0.5009	-0.0531	0.2478	0.6258	0.5307	0.3552
BP1062	probable aminotransferase	-0.0533	0.2329	0.3048	-0.1514	0.1737	-0.1125	0.0942	-0.1665	-0.1152	-0.1479	0.1696	0.0337	0.2992	0.1782	0.3266	0.717	-0.006	0.3204	0.1547	-0.1289	0.0151	-0.0133	-0.0167	0.2787	0.1151	-0.0535	0.3031	0.3156	-0.1247	-0.1534	0.1805	-0.0859	0.2701	0.0749	0.2304	0.222	0.3114	0.495	0.2457	0.3208	0.2641	0.3061	0.1649	0.1392	0.3393	0.3781	0.3242	0.4116
BP1063	conserved hypothetical protein	-0.074	0.0076	0.2631	-0.3746	0.126	0.0664	0.0296	-0.2034	0.1688	-0.5416	0.2045	0.1469	0.1477	0.3685	0.0537	-0.0709	-0.1122	0.417	0.2321	0.5359	0.2522	-0.1413	-0.4731	0.2208	0.2388	0.2538	0.4025	0.123	0.3631	-0.2066	0.0988	0.3287	0.2234	0.5379	0.5925	0.2271	0.0589	0.0764	0.0165	0.2209	0.0295	0.4457	0.4746	-0.0645	0.5194	0.642	0.2487	0.2104
BP1064	NADP-dependent malic enzyme	0.1196	-0.0249	-0.155	0.169	0.0723	-0.1975	-0.1647	0.3885	0.0729	-0.2646	0.1735	0.1832	0.1256	0.4264	0.1518	0.6816	0.2076	-0.0151	0.0983	-0.2251	-0.1657	-0.0684	0.1071	0.6465	0.0841	-0.0649	0.055	0.3671	0.2238	-0.2873	0.2542	0.1499	-0.0391	-0.139	0.1712	-0.0832	0.0911	0.1527	0.0831	0.5402	0.1263	0.2546	0.2244	0.1287	0.3099	0.1611	0.1783	0.4396
BP1065	conserved hypothetical protein (Pseudogene)	0.3581	0.4053	0.4895	-0.1869	0.1517	-0.2608	-0.073	-0.0977	-0.0121	0.0166	0.3976	0.4921	0.4202	0.343	0.5499	0.2084	0.2058	0.3779	0.1448	0.104	0.1414	-0.0144	-0.0656	0.3349	0.1474	0.281	0.5734	0.1412	0.2969	-0.0378	0.2592	0.4004	0.4052	0.3772	0.6669	0.3898	0.3268	0.2915	0.0862	0.1979	-0.1341	0.6169	0.2469	0.3643	0.5722	0.793	0.3616	0.1562
BP1066	conserved hypothetical protein	0.4148	0.0465	0.5098	-0.58	0.0239	0.2951	0.3547	-0.2347	0.1061	-0.3884	0.1538	0.2259	0.316	0.5049	0.2579	0.0706	-0.2797	0.4254	0.0401	-0.046	0.2291	-0.2268	-0.6441	0.1459	0.2423	-0.2073	0.1839	-0.185	0.4152	-0.1962	0.1543	0.4419	0.1943	0.4771	0.5096	0.1098	0.321	0.3572	0.2273	-0.1363	-0.153	0.4127	0.2107	0.3685	0.7868	1.0462	-0.0569	0.1617
BP1068	phosphate transport ATP-binding protein	-0.0893	0.1142	0.0544	-0.2009	-0.1499	-0.005	0.2601	-0.133	-0.0835	-0.4484	0.0915	-0.0638	0.1763	0.286	0.3589	1.0496	0.257	0.2221	0.0293	-0.3389	0.1087	-0.027	0.0593	0.5938	0.1747	0.2032	0.324	0.4151	-0.501	-0.3569	-0.4136	0.3499	0.1288	-0.0844	0.4147	-0.0789	0.3058	0.3829	0.2538	0.4523	0.1593	0.2658	0.009	0.2362	0.6385	0.545	0.02	0.3368
BP1069	phosphate transport system permease protein	-0.0208	-0.1108	0.4311	0.0628	0.0696	0.2861	0.066	0.0765	-0.0006	-0.5315	0.3992	0.1144	0.1719	0.2424	0.539	-0.2086	0.3926	-0.0197	0.1639	0.8701	-0.1735	0.3109	0.4183	0.5259	0.0346	0.3423	0.1861	0.489	-0.2047	-0.0369	0.7393	0.1882	0.1655	0.6654	0.2915	0.2229	0.1325	0.4109	0.2783	0.5759	0.4202	0.2256	0.0172	0.2106	0.557	0.6754	0.1518	0.5663
BP1070	phosphate transport system permease protein	0.0265	0.0141	-0.3893	-0.3926	-0.2357	-0.2583	0.0077	-0.0066	-0.1025	-0.3811	-0.2256	-0.1947	0.0416	0.2969	0.4087	0.2629	0.1897	0.0592	-0.1781	-0.309	0.1502	0.1851	0.1549	0.2269	0.0073	-0.1186	0.172	-0.0096	-0.2021	-0.585	0.0214	0.1426	-0.0236	-0.3198	0.0046	-0.1781	0.2289	0.2386	0.2001	0.3042	0.0926	0.3427	0.1421	0.2685	0.3395	0.4431	0.2939	0.0939
BP1071	phosphate-binding periplasmic protein precursor	-1.148	-1.7046	-1.7444	-1.7712	-1.5139	-0.0064	0.2521	-0.0601	-0.274	-1.8497	-1.4543	-1.4862	-1.405	0.1604	0.8057	0.5449	0.5075	0.0454	-0.1194	-0.0054	0.48	0.2825	0.1935	0.4692	0.2979	0.1861	0.8299	0.6742	-1.4772	-1.8466	-1.6419	0.1002	0.2229	0.2708	0.316	0.0456	0.4665	0.5027	0.8332	0.9056	0.266	0.32	0.2353	0.5171	0.5778	0.8361	0.4483	0.7233
BP1072	polyphosphate kinase	0.0288	-0.1443	-0.2373	-0.2831	0.0557	-0.2538	-0.2189	0.0177	-0.0134	-0.3539	0.2038	0.1311	0.1318	0.2223	0.1917	-0.3132	0.1255	0.1831	-0.0835	0.3598	0.1959	0.5392	0.3341	0.4266	-0.0712	0.0809	0.1767	0.2663	-0.168	-0.1709	0.1555	0.6931	0.3304	0.5316	0.1287	0.1327	0.2175	0.4425	0.0325	0.4118	0.1821	0.2773	0.1388	0.3044	0.684	0.8054	0.1277	0.3447
BP1073	exopolyphosphatase	0.1271	-0.1039	-0.2245	-0.1225	-0.1367	-0.3058	-0.3896	0.1479	0.0266	-0.4326	-0.0438	-0.0962	0.1618	0.3616	0.175	0.2001	0.1998	0.3629	-0.1277	-0.7725	0.0666	-0.0364	-0.0186	0.4964	0.1766	0.021	0.324	0.2428	0.27	-0.242	0.1834	0.1834	-0.0802	-0.4058	0.1791	-0.1209	0.0923	0.0446	0.1846	0.2618	0.0443	0.4071	0.2777	0.0314	0.4398	0.1059	0.0667	0.2007
BP1074	conserved hypothetical protein	0.1142	0.0625	0.0891	-0.1677	-0.1184	-0.3601	-0.3159	-0.2056	-0.1227	-0.4446	0.0138	0.0706	0.0745	0.1133	0.0032	-0.1866	-0.0575	-0.032	-0.169	-0.2877	0.0204	-0.3102	-0.0937	0.4183	0.0626	0.0959	0.1476	0.0645	0.1043	-0.2554	0.1002	0.5077	-0.0887	-0.0686	0.1746	-0.2873	0.0945	0.0753	-0.1788	0.0861	-0.2287	0.133	0.0195	0.3102	0.5888	0.4816	-0.155	0.2347
BP1075	phosphoglucomutase/phosphomannomutase	-0.2448	-0.0779	-0.1892	0.056	-0.2231	-0.4567	-0.714	-0.0692	-0.2946	-0.5528	-0.2264	-0.101	0.0481	0.1982	0.091	0.4945	0.1997	-0.1148	-0.0939	-0.7317	-0.1632	-0.1106	0.1322	0.4318	0.0846	0.0313	0.2441	0.3062	-0.0264	-0.2724	0.046	0.46	0.1787	-0.1622	0.1756	0.0058	-0.0883	-0.0584	-0.0548	0.3127	-0.1448	0.2109	-0.0478	0.0829	0.5393	0.3342	-0.1996	0.1764
BP1076	dihydropteroate synthase	-0.0415	0.0273	0.3085	-0.3144	-0.0908	-0.198	-0.2587	-0.2593	-0.2755	-0.2975	0.0628	0.0581	0.2009	0.344	0.2018	0.2526	0.1083	0.3135	-0.0588	0.1713	-0.0724	-0.0098	-0.0872	0.2944	0.0788	0.0335	0.4547	0.3544	0.0676	0.0448	0.1691	0.7416	0.3946	0.4742	0.2843	0.1492	0.1235	0.1616	0.136	0.1578	-0.1002	0.164	0.0609	0.5144	0.667	0.8112	0.1055	0.343
BP1077	cell division protein	-0.1049	-0.4509	0.0451	-0.5482	-0.3252	-0.2818	-0.5136	-0.4989	-0.3527	-0.5951	-0.1471	-0.0976	-0.2115	0.1051	-0.1461	-0.0453	-0.4192	-0.065	-0.2643	0.2218	-0.3037	-0.2738	-0.2522	-0.2113	-0.2275	-0.0892	-0.1724	-0.1807	0.2053	0.0334	0.1719	1.2241	-0.018	0.2556	0.0714	-0.0921	-0.1532	-0.1996	-0.3491	-0.2706	-0.3419	-0.0109	-0.1605	0.1682	1.5332	1.6249	-0.3692	-0.1864
BP1078	ribosomal RNA large subunit methyltransferase j	-0.0767	-0.1586	-0.164	-0.1055	-0.0109	0.0257	-0.1854	0.588	0.3389	-0.7056	-0.1668	-0.067	-0.0045	0.2504	-0.4225	-0.9091	-0.1499	0.0978	-0.2032	-0.1538	-0.228	0.1361	0.4016	0.4662	0.0475	-0.0696	0.0624	0.2126	0.0436	0.0147	-0.0796	0.5753	0.0511	0.1007	0.0895	-0.2011	-0.225	0.0248	-0.1046	0.1546	0.0951	-0.1911	0.3119	-0.266	0.4266	0.2923	-0.3891	0.3032
BP1079	conserved hypothetical protein	-0.1579	-0.2206	-0.1224	-0.0062	-0.0717	-0.2555	-0.4799	-0.0622	-0.2659	-0.6396	-0.1604	0.0366	-0.0259	-0.0265	-0.1577	0.3332	-0.1096	-0.002	-0.3903	-1.2109	-0.1704	-0.681	-0.4277	0.1191	-0.2127	-0.3879	-0.1343	-0.0336	0.2735	-0.25	0.0663	1.1726	-0.2419	-0.8645	-0.0898	-0.3829	-0.3167	-0.2679	-0.1869	0.0383	-0.3391	0.0198	-0.174	0.1756	1.0667	1.0064	-0.3862	0.1026
BP1080	transposase	-0.1133	-0.8153	-0.8594	-0.7692	-0.2052	-0.9176	-1.1556	-0.7204	-0.4586	-0.5951	0.4578	-0.0059	-0.2602	0.1292	0.7914	-0.0657	-0.0794	-0.8565	-0.5099	-0.893	-0.1341	-1.3976	-0.4226	0.3134	-0.6724	-0.1389	-0.612	-0.7723	-0.046	-0.9926	-0.4398	0.2707	-0.5906	0.0247	0.1425	-0.3145	-0.541	-0.8073	-0.8388	-0.5445	-1.4167	-0.1082	-0.5002	-0.609	0.6784	0.6566	-1.2387	-0.7961
BP1081	C-terminal region of a putative membrane protein (pseudogene)	0.0973	0.063	0.2517	-0.0322	0.256	0.0188	0.1012	-0.3125	0.0496	0.0025	0.2966	0.1503	0.0544	0.3087	0.2121	0.1343	0.2031	0.0483	-0.3498	-0.1641	-0.0091	-0.0213	0.068	0.2028	-0.0476	-0.1825	0.2595	0.0699	0.4439	0.3203	0.5202	0.5757	0.2315	-0.179	0.0116	-0.4426	-0.2017	0.0019	-0.2318	0.1437	-0.2229	0.1928	-0.034	0.2214	0.928	0.5675	-0.3816	-0.0127
BP1083	putative membrane protein	-0.6453	-0.6257	-0.3242	-0.336	-0.2943	-0.3516	-0.5559	-0.0696	0.0724	-0.6801	-0.2115	-0.0688	-0.4625	-0.0989	-0.0423	0.6297	-0.2343	-0.1273	-0.2846	0.1738	-0.1826	-0.0712	0.1998	0.1225	-0.3041	-0.0382	-0.2685	-0.0331	-0.3061	-0.4574	-0.1515	1.3836	-0.1467	0.3468	0.0867	-0.3191	-0.3489	-0.2155	-0.1555	0.0268	-0.0604	-0.3074	-0.0199	-0.0469	1.1843	1.298	0.0303	0.1659
BP1084	homoserine kinase	0.5238	-0.1363	-0.2148	-0.085	0.1629	-0.1522	-0.1241	0.2322	0.2302	-0.3227	0.1124	0.2424	0.2602	0.2813	0.227	0.3733	0.257	0.1667	0.2188	0.256	0.1746	0.1611	0.5454	0.4979	0.1647	0.2528	0.3163	0.4495	0.024	-0.1663	0.1723	0.0737	0.2777	0.3962	0.4078	0.2963	0.237	0.437	0.0792	0.4539	0.1678	0.3276	0.2503	-0.0402	0.1703	0.1233	0.0406	0.4975
BP1085	conserved hypothetical protein	0.2223	0.0552	0.5735	-0.4189	0.2604	-0.3382	-0.2379	-0.426	-0.2003	-0.3207	0.2884	0.2611	0.1683	0.1957	0.268	-0.9196	-0.1317	0.2587	-0.038	0.202	-0.0429	-0.2804	-0.1003	0.144	0.1771	0.0706	0.0148	-0.0698	0.1528	-0.1951	0.2228	0.2573	0.22	0.2486	0.3327	0.031	0.2402	0.3689	0.0982	0.0265	-0.1378	0.2431	0.2429	0.3925	0.5319	0.9693	-0.1313	-0.0238
BP1087	conserved hypothetical protein	-0.5712	-0.3826	-0.7498	-0.5489	-0.384	-0.5372	-0.6801	-0.3135	-0.4994	-1.0009	-0.5498	-0.3235	-0.1716	-0.3711	-0.5117	-0.7707	-0.5949	-0.6224	-0.8756	-1.0643	-0.6434	-0.7474	-0.8041	-0.3485	-0.6923	-0.9013	-0.6784	-0.5415	-0.3226	-0.6247	-0.5753	1.3878	-0.4761	-0.5395	-0.3673	-0.6259	-0.5295	-0.5425	-0.6755	-0.4096	-0.6592	-0.5079	-0.4713	-0.1704	1.3	1.0278	-1.0585	-0.1991
BP1088	putative membrane protein	-0.0971	-0.2274	-0.036	-0.7473	-0.2397	-0.7508	-0.7702	-0.9594	-0.5387	0.1022	-0.2555	-0.1502	-0.2791	-0.339	-0.2851	0.8	-0.8575	-0.2118	-0.6442	-0.8841	-0.4651	-1.1107	-0.7348	-0.7	-0.5052	-0.8459	-0.5324	-1.0821	0.0859	-0.3078	-0.1074	1.1523	-0.4152	-0.6323	-0.3368	-0.8285	-0.4524	-0.4984	-0.5645	-0.6745	-0.7975	-0.3017	-0.2453	-0.1254	1.2054	1.375	0.0191	-0.8726
BP1089	putative membrane protein	0.0206	-0.1548	0.3794	-0.2258	0.0215	-0.1671	-0.0474	0.0086	-0.1348	-0.5973	0.4713	-0.0355	-0.1035	-0.1055	-0.0816	0.0144	-0.108	0.1204	-0.443	0.6647	-0.2721	-0.0635	0.4535	0.2585	-0.1045	0.1859	-0.148	0.0006	-0.3853	-0.2602	0.5361	0.7245	-0.1743	0.5172	0.1924	-0.298	-0.0406	0.1372	0.0113	0.0631	-0.0606	-0.214	-0.0617	0.264	0.9742	1.3234	0.088	0.0957
BP1090	conserved hypothetical protein	-0.0266	0.0582	0.156	0.081	0.0193	-0.2741	-0.3942	-0.2283	-0.2327	0.0634	0.3967	0.1413	0.0924	0.179	0.0485	0.2727	-0.0473	0.1323	-0.0336	0.0274	-0.1287	0.0277	0.164	0.2858	0.0198	-0.1078	0.0974	0.1429	0.0249	0.0772	0.3869	0.8368	0.0155	0.0525	0.0018	-0.1416	0.0456	0.014	0.014	0.1252	0.0568	-0.0025	-0.0332	0.4486	0.7403	0.9256	0.2279	0.1715
BP1091	probable two-component response regulator	-0.624	-0.6604	-0.1498	-0.9924	-0.4734	-0.9001	-0.7326	-0.7974	-0.5399	-0.4743	-0.2356	-0.3271	-0.1871	-0.569	-0.0859	-0.018	-0.5302	-0.3956	-0.7277	-0.0732	-0.5333	-0.6574	-0.2086	-0.2111	-0.7208	-0.6455	-0.1896	-0.5256	-0.8193	-0.5512	-0.1691	1.3336	-0.6406	-0.2304	-0.3789	-0.3584	-0.4571	-0.6047	-0.5601	-0.9017	-0.4527	-0.3634	-0.5444	0.7946	1.4757	1.8839	-0.2563	-0.8798
BP1092	probable two-component histidine kinase	-0.4686	-0.236	-0.9015	0.0483	-0.1887	-0.1394	-0.3229	0.4025	-0.0693	-0.3745	-0.1272	-0.2747	-0.1848	-0.0685	-0.1021	0.7602	0.0252	-0.4827	-0.1846	-0.2186	-0.2657	-0.0616	0.433	0.2163	-0.2482	-0.3491	-0.1003	0.3032	-0.4412	-0.483	-0.0106	0.5363	-0.0356	-0.2328	-0.2744	-0.1453	-0.3484	-0.5039	-0.6245	0.1018	0.002	-0.2823	-0.22	0.0448	0.5664	0.0264	-0.154	0.1821
BP1094	high-affinity branched-chain amino acid transport ATP-binding protein	0.4313	-0.9161	-1.5591	-1.0636	-0.328	-0.5675	-0.9138	-1.2023	-0.2898	-0.347	0.1169	1.0052	-0.3043	0.5716	0.9417	1.2302	0.3206	-0.7557	-0.4332	-0.3108	-0.5714	-0.3852	-0.2621	0.1983	-0.226	-0.6007	-0.9683	-0.7476	1.0839	-1.0871	0.2571	0.368	-0.6438	0.3738	0.312	-0.2574	-0.2425	-0.9247	-0.8468	-0.8253	-0.384	0.994	-0.7131	-0.8135	0.8555	0.3335	-1.0501	-0.5298
BP1095	high-affinity branched-chain amino acid transport system permease protein	0.0735	-0.7339	-0.9394	-1.2116	-0.2661	-0.048	-0.7626	-0.704	-0.479	-0.1097	0.3126	1.3182	-0.0769	1.0967	0.7204	0.915	1.1945	-0.8504	-0.2012	-0.0907	-0.0772	-0.0169	-0.2787	0.7638	-0.2751	-0.4075	-1.1891	-0.5624	1.178	-1.1307	-0.0197	0.2017	-0.2372	0.4721	0.9126	-0.2324	-0.669	-0.9877	-0.8308	-0.6095	-0.6166	1.0743	-0.6739	-0.6121	1.1562	0.6736	-0.6307	-0.7205
BP1096	high-affinity branched-chain amino acid transport system permease protein (Pseudogene)	-0.205	-0.5974	0.5161	-0.0706	0.4952	0.4034	0.453	0.1028	-0.0558	-0.095	0.8435	0.6403	0.1557	0.0582	0.8186	0.0717	0.3045	0.0954	-0.2932	0.4073	-0.3003	0.0627	0.5304	0.2934	-0.1415	-0.5224	-0.0828	-0.1465	-0.2419	-0.4084	0.2705	0.5411	-0.2002	0.7005	0.5381	-0.0601	0.1235	-0.1004	0.0056	0.0166	0.1298	0.3643	-0.0546	-0.4289	0.5938	0.5723	0.1725	0.3208
BP1097	putative amino acids binding protein	-0.0328	-0.5519	-0.6331	-0.3858	-0.2568	-0.2899	1.5769	-0.5777	-0.4867	-0.2087	0.0919	0.2458	0.0596	0.0914	0.4275	0.2545	0.1152	-0.3567	-0.3785	-0.5963	-0.2833	-0.3228	0.1199	0.0461	-0.2047	-0.6794	-0.4501	-0.5402	0.3283	-0.4284	-0.0366	0.5398	-0.3071	-0.2145	0.2272	0.0355	-0.032	-0.3952	-0.5276	-0.2964	0.0081	0.3851	-0.5559	-0.2396	0.8409	0.5093	-0.3335	-0.4145
BP1098	high-affinity branched-chain amino acid transport ATP-binding protein	0.2045	-1.0658	-1.7379	-1.0331	-0.4725	0.0329	-1.6964	-1.1401	-0.7344	-0.6813	0.1398	0.865	-0.415	0.1802	0.7896	0.1875	1.0136	-1.4726	-0.2598	-0.3745	-0.4925	-1.3448	-0.0804	0.4075	-0.5046	-0.9277	-1.0232	-1.5881	1.0925	-1.1516	-0.2248	0.0681	-0.7838	0.1599	0.7399	-0.0122	-0.6333	-1.4054	-1.1914	-1.2083	-1.5776	0.786	-1.3353	-1.3995	0.6908	-0.0301	-0.9031	-1.1689
BP1099	putative long-chain fatty-acid--CoA ligase	0.3478	-0.3424	-0.7971	-0.6084	-0.226	-0.4276	-0.9163	-0.6993	-0.6536	-0.5011	0.281	0.5093	-0.0309	0.1572	0.4781	0.5014	0.3325	-0.362	-0.3653	-0.4235	-0.0851	-0.7999	-0.1766	0.029	-0.0839	-0.1069	-0.8365	-0.3078	0.4354	-0.5213	-0.5032	1.083	0.1135	0.1143	0.0564	-0.0931	-0.7472	-0.6438	-0.212	-0.5108	0.07	1.048	-0.6708	0.016	0.7707	0.0791	-0.6783	-0.456
BP1100	probable TetR-family transcriptional regulator	0.2099	0.4187	0.3346	0.565	0.3489	0.0299	0.6321	0.4958	-0.2208	-0.7277	0.6782	-0.1877	0.2941	-0.2514	0.3278	0.3914	0.7455	-0.0312	-0.2983	0.8078	-0.1857	0.9438	1.6886	1.0115	0.2109	0.4637	0.4123	0.9923	-0.776	-0.4355	0.6481	0.3934	0.0201	0.3765	-0.1508	-0.0666	0.3632	0.3844	0.2571	1.0173	1.02	-0.1566	-0.247	0.7121	0.2239	0.9409	-0.018	0.9031
BP1101	putative membrane protein	0.055	-0.1682	-0.0537	-0.4106	0.0766	-0.4339	-0.1241	-0.178	-0.1061	-0.2345	0.2823	0.3255	0.0099	0.1999	0.2371	-0.0672	-0.1391	0.3123	-0.063	0.1738	-0.082	-0.2755	0.12	0.2463	-0.017	0.0083	0.209	-0.1165	0.3311	0.0198	0.2872	0.2927	0.0616	0.09	0.359	-0.0663	0.3642	-0.0525	-0.11	0.0435	-0.1835	0.2402	0.1943	-0.1292	0.5096	0.3781	-0.2476	-0.0479
BP1102	lysyl-tRNA synthetase	0.0444	-0.0062	-0.2546	-0.0464	0.0092	-0.2577	-0.3176	0.0851	-0.2023	-0.4614	0.1338	0.0482	0.5416	0.2499	0.1549	-0.0793	0.3324	-0.1435	0.1602	-0.3404	-0.0641	-0.2364	-0.0727	0.6138	-0.2292	-0.1479	0.2511	0.3555	-0.0211	-0.0347	0.408	0.2735	0.0424	-0.3032	0.2328	0.0159	0.1093	0.1997	0.0403	0.5038	-0.0078	0.3055	-0.1062	0.319	0.4438	0	-0.1988	0.4087
BP1103	probable short chain dehydrogenase	0.016	-0.023	-0.1738	-0.1594	-0.3097	-0.4521	-0.4531	-0.0536	-0.1042	-0.7389	0.0185	0.1574	0.386	0.229	-0.0439	-1.1496	0.137	0.0233	-0.0271	-0.2764	0.0132	-0.0563	0.1838	0.3943	-0.0318	-0.0439	0.3608	0.3322	0.1696	-0.0689	0.155	0.3186	0.018	-0.0863	0.2274	-0.0025	0.0336	0.1707	0.0853	0.4214	0.0445	0.1768	0.0575	0.2888	0.4318	0.321	-0.3867	0.462
BP1104	peptide chain release factor 2	0.1639	-0.0394	-0.1026	0.1801	-0.0654	-0.2787	-0.0239	0.111	-0.2889	-0.1444	0.1318	0.057	0.2941	0.3595	0.0828	0.1226	0.2826	0.1128	0.0791	-1.3808	0.0024	-0.2031	-0.1425	0.5267	-0.0514	-0.1872	0.2347	0.3507	0.3622	0.2841	0.5944	0.1776	0.0955	-1.1642	-0.0996	0.0045	0.0925	0.1782	0.0805	0.2523	-0.1418	0.3021	-0.054	-0.1483	0.0172	-0.2604	-0.1533	0.2766
BP1105	single-stranded-DNA-specific exonuclease	-0.521	0.0606	0.1831	-0.0459	0.0271	0.0007	-0.49	-0.0812	-0.1106	-0.1459	0.1004	0.3324	0.1661	0.3686	0.3266	0.329	0.1175	0.3826	0.2748	0.0076	0.1904	-0.1351	-0.082	0.3568	0.196	0.1574	0.2972	0.3144	0.214	0.0497	0.0949	0.3735	0.3667	0.1036	0.5081	0.1939	0.1508	0.069	0.2329	0.4748	-0.0952	0.3808	0.2327	0.102	0.5086	0.4948	0.2019	0.4914
BP1106	putative exported protein	-0.0847	0.1242	0.4206	-0.2018	0.1716	0.1098	-0.3506	-0.0919	-0.1076	-0.1728	0.2025	0.1047	0.1482	0.4055	0.1739	0.3103	0.0965	0.4012	0.265	0.2537	-0.082	0.0605	0.0844	0.4155	0.0408	0.1736	0.1497	0.3743	0.0865	0.0473	0.1555	0.1721	0.4291	0.2518	0.3383	0.236	0.2254	0.3186	0.3388	0.275	0.0012	0.2697	0.2732	0.2679	0.2918	0.6292	0.1421	0.3218
BP1107	lipoprotein releasing system transmembrane protein	0.1345	0.1364	0.0459	0.2438	0.2558	-0.3996	-0.4365	0.1566	0.1111	0.4919	0.0847	0.1909	-0.0956	0.1372	-0.0428	-0.2057	0.1494	0.0532	-0.0264	-0.0522	-0.0288	0.2467	0.9743	0.1753	0.1411	0.1769	-0.0633	0.2881	0.0738	-0.0069	0.4139	0.3707	-0.0039	0.0398	-0.0048	-0.1148	0.1554	0.3723	-0.076	0.3373	0.2959	-0.0176	0.0659	0.5631	0.1597	0.2973	0.4916	0.205
BP1108	lipoprotein releasing system ATP-binding protein	-0.0755	0.0594	-0.2589	0.341	-0.0347	-0.5673	-0.7721	0.1343	-0.3355	-0.4514	-0.0797	0.4426	-0.012	0.0127	-0.0815	0.0629	0.2111	-0.2422	-0.1031	-0.518	-0.2123	-0.1657	0.1961	0.3309	-0.2407	-0.2818	0.0693	0.398	-0.0538	-0.1605	-0.1917	0.3494	-0.0778	-0.3361	-0.2078	-0.0551	0.0102	-0.1822	-0.3178	0.2567	-0.085	-0.0755	-0.1459	0.3224	0.4642	0.1133	-0.4243	0.5091
BP1109	putative deoxyribonuclease	0.1701	0.5725	0.2046	0.1523	0.1849	-0.5231	-0.6552	-0.2926	-0.4025	-0.1738	0.202	0.3892	0.0362	0.1277	0.1809	0.6739	0.2033	0.0331	-0.0809	-0.223	-0.091	-0.1224	0.2127	0.2183	-0.0554	-0.0395	0.0459	0.078	0.1386	-0.0853	0.4164	0.0423	0.1582	-0.0774	0.2591	0.0797	-0.1735	-0.1657	-0.2216	0.0322	-0.0752	0.2632	-0.0452	0.1466	0.6745	0.8069	-0.1411	0.1589
BP1110	serine protease	0.0279	-0.0025	0.5767	-0.2012	0.0374	0.1398	0.3169	-0.3296	-0.1531	-0.4021	0.3773	0.2169	0.5456	-0.1353	0.017	0.6656	-0.0282	0.0787	-0.1001	0.1767	-0.3764	0.0425	0.4995	0.3603	0.21	0.0077	0.2684	0.2203	-0.4639	-0.2368	0.2659	0.4188	0.0945	0.5459	0.3047	0.1135	0.3277	0.4643	0.4081	0.0528	0.11	0.0413	-0.024	0.7231	0.2864	0.8731	0.2058	-0.0096
BP1111	hypothetical protein	0.477	-0.667	-0.3264	-0.2944	0.0172	-0.6333	-0.5806	-0.8584	-0.8958	-0.1999	0.2561	0.5392	0.1574	0.1098	1.2036	-0.7966	0.2762	-1.1559	-0.301	-0.6791	-0.9236	-0.6957	-0.3755	-0.0227	-0.3606	-1.217	-1.4267	-1.0779	0.1808	-0.6235	-0.2908	0.1724	-0.147	0.6681	0.1001	-0.037	0.5811	-0.7412	-0.8045	-1.3637	-1.1315	0.4888	-1.5909	-0.9386	0.7485	0.891	-0.7308	-1.3823
BP1112	putative outer membrane ligand binding protein	-1.1286	-1.6685	-1.2486	-1.6715	-1.278	0.0558	0.699	0.4716	0.7555	-1.1	-0.9816	-0.9838	-0.9814	-0.8028	-1.0774	0.4007	-1.1655	-1.2589	-1.1401	-0.9717	-1.2073	-1.5961	-1.0727	-0.6626	-1.467	-1.5258	-1.5209	-1.5694	1.7468	1.5692	1.9586	-0.9287	-0.7981	-0.6227	-0.5165	-1.2617	-1.1506	-1.1826	-0.8989	-0.9315	-1.5716	-1.005	-1.3436	-1.702	-0.445	-0.8697	-1.0264	-0.8759
[truncated: 2,714 more rows]
[truncated: 16 more columns]
