# Supplementary material for: Genome-Wide Gene Expression Analysis of Bordetella pertussis Isolates Associated with a Resurgence in Pertussis: Elucidation of Factors Involved in the Increased Fitness of Epidemic Strains
Source: PLoS One. 2013 Jun 11;8(6):e66150. doi: 10.1371/journal.pone.0066150 (PMC3679012; doi:10.1371/journal.pone.0066150)
Supplement: Table S2 — Summary of all genes significantly up or down regulated in strains carrying the ptxP3 allele compared to strains with the ptxP1 allele. The gene ID, gene name and gene category are shown. (XLS) [file pone.0066150.s002.xls]

## Sheet: Sheet1
GeneID	Gene name	Gene category
BP0007	elongation factor Tu	Macromolecule synthesis/modification
BP0016	DNA-directed RNA polymerase beta chain	Macromolecule synthesis/modification
BP0022	Two-component response regulator	Regulation
BP0034	glycyl-tRNA synthetase beta chain	Macromolecule synthesis/modification
BP0035	putative haloacid dehalogenase-like hydrolase	Miscellaneous
BP0042	putative lipase (Pseudogene)	Pseudogenes
BP0046	probable malate/L-lactate dehydrogenase (Pseudogene)	Pseudogenes
BP0048	conserved hypothetical protein	Conserved hypothetical
BP0072	transposase	Phage-related or transposon-related
BP0073	transposase (pseudogene)	Pseudogenes
BP0074	heat shock protein	Cell processes
BP0075	probable glutathione S-transferase	Miscellaneous
BP0090	UDP-N-acetylglucosamine 2-epimerase	Cell surface
BP0091	lipopolysaccharide biosynthesis protein	Cell surface
BP0096	putative exported protein	Cell surface
BP0103	probable class IV aminotransferase	Miscellaneous
BP0104	conserved hypothetical protein	Conserved hypothetical
BP0106	lipoic acid synthetase	Cofactor biosynthesis
BP0108	dTDP-4-dehydrorhamnose reductase	Cell surface
BP0113	thiol:disulfide interchange protein DsbA precursor	Cell processes
BP0122	sugar ABC transporter, ATP-binding protein	Transport/binding proteins
BP0123	putative cAMP phosphodiesterase	Small molecule degradation
BP0132	putative membrane protein	Cell surface
BP0134	putative bacterioferritin-associated ferredoxin	Adaptation
BP0140	conserved hypothetical protein (pseudogene)	Pseudogenes
BP0149	probable transcriptional regulator	Regulation
BP0154	LysR family transcriptional regulator	Regulation
BP0159	phosphate regulon sensor protein	Regulation
BP0160	phosphate regulon transcriptional regulatory protein	Regulation
BP0161	ubiquinone/menaquinone biosynthesis methyltransferase	Cofactor biosynthesis
BP0169	putative exported protein	Cell surface
BP0173	putative exported protein	Cell surface
BP0177	putative lipoprotein	Cell surface
BP0178	putative lipoprotein	Unknown
BP0179	conserved hypothetical protein	Conserved hypothetical
BP0181	putative exported protein	Cell surface
BP0182	putative iron sulfur binding protein	Miscellaneous
BP0185	deoxycytidine triphosphate deaminase	central/intermediary metabolism
BP0186	conseved hypothetical protein	Conserved hypothetical
BP0189	hypothetical protein	Unknown
BP0190	probable orn/arg/lys decarboxylase	Small molecule degradation
BP0195	glycine cleavage system T protein	Small molecule degradation
BP0196	glycine cleavage system H protein	Small molecule degradation
BP0197	glycine cleavage system P protein	Small molecule degradation
BP0205	putative exported protein	Cell surface
BP0206	thiamine biosynthesis protein	Cofactor biosynthesis
BP0208	putative oxidoreductase	Miscellaneous
BP0214	Conserved hypothetical protein	Conserved hypothetical
BP0216	autotransporter subtilisin-like protease	Pathogenicity
BP0221	3-oxoadipate CoA-transferase subunit A	Small molecule degradation
BP0222	3-oxoadipate CoA-transferase subunit B	Small molecule degradation
BP0223	methylmuconolactone isomerase	Small molecule degradation
BP0224	conserved hypothetical protein	Conserved hypothetical
BP0225	3-oxoadipate enol-lactone hydrolase	Small molecule degradation
BP0226	conserved hypothetical protein	Conserved hypothetical
BP0233	GntR family transcriptional regulator	Regulation
BP0236	conserved hypothetical protein (Pseudogene)	Pseudogenes
BP0240	conserved hypothetical protein	Conserved hypothetical
BP0242	phosphoribosylformylglycinamidine cyclo-ligase	Ribonucleotide biosynthesis
BP0248	fumarate hydratase class II	Energy metabolism
BP0252	gamma-glutamyltranspeptidase	Cofactor biosynthesis
BP0259	cytochrome D ubiquinol oxidase subunit I	Energy metabolism
BP0260	cytochrome D ubiquinol oxidase subunit II	Energy metabolism
BP0261	putative exported protein	Cell surface
BP0265	probable LysR-family transcriptional regulator (Pseudogene)	Pseudogenes
BP0267	N-terminal region of an outer membrane porin (Pseudogene)	Pseudogenes
BP0270	hypothetical protein	Unknown
BP0273	stringent starvation protein B	Adaptation
BP0276	cytochrome B	Energy metabolism
BP0288	probable transcriptional regulator	Regulation
BP0298	conserved hypothetical protein	Conserved hypothetical
BP0299	MarR-family transcriptional regulator	Regulation
BP0306	probable bifunctional hydroxylase/oxidoreductase (Pseudogene)	Pseudogenes
BP0319	putative transcriptional regulator	Regulation
BP0321	aspartate carbamoyltransferase	Ribonucleotide biosynthesis
BP0326	monofunctional biosynthetic peptidoglycan transglycosylase	Cell surface
BP0331	conserved hypothetical protein	Conserved hypothetical
BP0356	GntR-family transcription regulator	Regulation
BP0369	putative endonuclease	Macromolecule synthesis/modification
BP0372	glutamyl-tRNA(GLN) amidotransferase subunit A	Macromolecule synthesis/modification
BP0379	putative L-lactate dehydrogenase	Energy metabolism
BP0380	putative Sodium:sulfate symportert	Transport/binding proteins
BP0381	putative TetR-family transcriptional regulator	Regulation
BP0383	acetylglutamate kinase	Amino acid biosynthesis
BP0387	putative exported protein	Cell surface
BP0390	putative tetrapyrrole methylase	Miscellaneous
BP0395	putative exported protein	Cell surface
BP0396	putative membrane protein	Cell surface
BP0397	conserved hypothetical protein	Conserved hypothetical
BP0398	putative membrane protein	Cell surface
BP0403	putative exported protein	Cell surface
BP0405	putative membrane protein	Cell surface
BP0410	putative universal stress protein	Adaptation
BP0412	putative GntR-family transcriptional regulator	Regulation
BP0415	putative membrane protein	Cell surface
BP0419	LysR-family transcriptional regulator	Regulation
BP0422	probable thiolase	Miscellaneous
BP0428	putative GntR-family transcriptional regulator	Regulation
BP0431	putative molybdopterin oxidoreductase	Miscellaneous
BP0437	LysR-family transcriptional regulator	Regulation
BP0438	conserved hypothetical protein	Conserved hypothetical
BP0440	N-terminal region of isovaleryl-CoA dehydrogenase (Pseudogene)	Pseudogenes
BP0441	MerR-family transcriptional regulator	Regulation
BP0442	metallo-beta-lactamase family protein	Miscellaneous
BP0450	conserved hypothetical protein	Conserved hypothetical
BP0451	succinylornithine transaminase	Small molecule degradation
BP0452	putative exported protein	Cell surface
BP0456	putative heme receptor	Pathogenicity
BP0467	acetolactate synthase large subunit	Amino acid biosynthesis
BP0468	AsnC-family transcriptional regulator	Regulation
BP0478	probable hydrolase	Miscellaneous
BP0479	conserved hypothetical protein	Conserved hypothetical
BP0480	putative membrane protein	Cell surface
BP0483	AraC-family transcriptional regulator	Regulation
BP0485	probable acylphosphatase (Pseudogene)	Pseudogenes
BP0490	DNA polymerase iii, beta chain	Macromolecule synthesis/modification
BP0495	probable inner-membrane protein	Cell surface
BP0500	hypothetical protein	Pathogenicity
BP0504	phage-related hypothetical protein	Cell surface
BP0505	phage-related conserved hypothetical protein	Phage-related or transposon-related
BP0506	phage-related hypothetical protein	Unknown
BP0507	hypothetical protein	Unknown
BP0508	phage-related exonuclease	Phage-related or transposon-related
BP0519	probable glutathione S-transferase	Miscellaneous
BP0520	putative exported protein	Cell surface
BP0521	conserved hypothetical protein	Conserved hypothetical
BP0534	probable enoyl-CoA hydratase/isomerase	Miscellaneous
BP0535	probable carboxymuconolactone decarboxylase	Miscellaneous
BP0546	bacterioferritin	Adaptation
BP0548	hypothetical protein	Unknown
BP0561	putative exported protein	Cell surface
BP0563	probable LysR-family transcriptional regulator	Regulation
BP0564	probable transporter	Transport/binding proteins
BP0570	putative exported protein	Cell surface
BP0575	probable MarR-family transcriptional regulator	Regulation
BP0579	maleate cis-trans isomerase	central/intermediary metabolism
BP0580	probable hydrolase (Pseudogene)	Pseudogenes
BP0582	putative isochorismatase	Miscellaneous
BP0589	putative exported protein	Cell surface
BP0591	oxidoreductase, medium chain	Miscellaneous
BP0592	putative iron-sulfur binding protein	Miscellaneous
BP0598	conserved hypothetical protein	Conserved hypothetical
BP0603	glycerol-3-phosphate dehydrogenase [NAD(P)+]	central/intermediary metabolism
BP0615	putative exported protein	Cell surface
BP0626	probable 2-oxo acid dehydrogenases acyltransferase (pseudogene)	Miscellaneous
BP0643	LysR-family transcriptional regulator	Regulation
BP0644	putative dihydrodipicolinate synthase	Miscellaneous
BP0650	LysR-family transcriptional regulator	Regulation
BP0652	probable acyl-CoA dehydrogenase	Miscellaneous
BP0653	probable acyl-CoA dehydrogenase	Miscellaneous
BP0659	probable zinc-binding dehydrogenase	Miscellaneous
BP0666	glucosamine--fructose-6-phosphate aminotransferase [isomerizing]	central/intermediary metabolism
BP0667	AsnC-family transcriptional regulator	Regulation
BP0683	4,5-dihydroxyphthalate decarboxylase	Small molecule degradation
BP0684	molybdopterin dehydrogenase (Pseudogene)	Pseudogenes
BP0684A	probable 2Fe-2S ferredoxin	Energy metabolism
BP0686	conserved hypothetical protein (Pseudogene)	Pseudogenes
BP0696	probable sigma(54) modulation protein (Pseudogene)	Pseudogenes
BP0698	putative exported protein	Cell surface
BP0700	probable hydrolase	Miscellaneous
BP0702	phosphoribosylglycinamide formyltransferase 2	Ribonucleotide biosynthesis
BP0703	N-terminal region of TonB dependent receptor protein (Pseudogene)	Pseudogenes
BP0709	aspartyl-tRNA synthetase	Macromolecule synthesis/modification
BP0721	probable aminotransferase	central/intermediary metabolism
BP0735	putative exported protein	Cell surface
BP0737	putative inner membrane sensor for iron transport	Regulation
BP0744	putative transcriptional regulator	Regulation
BP0749	50S ribosomal protein L21	Ribosome constituents
BP0751	octaprenyl-diphosphate synthase	Cofactor biosynthesis
BP0756	putative exported protein (Pseudogene)	Pseudogenes
BP0770	putative membrane protein	Cell surface
BP0782	putative exported protein	Cell surface
BP0787	N-terminal region of a putative membrane protein (Pseudogene)	Pseudogenes
BP0789	acetolactate synthase large subunit	Amino acid biosynthesis
BP0794	30S ribosomal protein S15	Ribosome constituents
BP0800	probable zinc-binding dehydrogenase	Miscellaneous
BP0806	methylaspartate ammonia-lyase	Small molecule degradation
BP0813	probable short-chain dehydrogenase	Miscellaneous
BP0814	probable LysR-family transcriptional regulator	Regulation
BP0815	cystathionine beta-lyase	Amino acid biosynthesis
BP0816	conserved hypothetical protein	Conserved hypothetical
BP0820	conserved hypothetical protein	Conserved hypothetical
BP0821	hydantoin utilization protein B	Amino acid biosynthesis
BP0822	hydantoin utilization protein A	Amino acid biosynthesis
BP0823	putative transcriptional regulator	Regulation
BP0825	conserved hypothetical protein	Conserved hypothetical
BP0843	respiratory-chain NADH dehydrogenase, 30 kDa subunit	Energy metabolism
BP0845	respiratory-chain NADH dehydrogenase I, 24 kDa subunit	Energy metabolism
BP0846	respiratory-chain NADH dehydrogenase, 51 kDa subunit	Energy metabolism
BP0847	NADH-ubiquinone oxidoreductase, 75 kDa subunit	Energy metabolism
BP0848	NADH-ubiquinone oxidoreductase, chain H	Energy metabolism
BP0849	NADH-ubiquinone oxidoreductase, chain I	Energy metabolism
BP0850	NADH-ubiquinone oxidoreductase, chain J	Energy metabolism
BP0853	NADH-ubiquinone oxidoreductase, chain M	Energy metabolism
BP0854	NADH-ubiquinone oxidoreductase, chain N	Energy metabolism
BP0863	phosphoserine phosphatase	Amino acid biosynthesis
BP0868	fructose-1,6-bisphosphatase	central/intermediary metabolism
BP0869	aminopeptidase N	Macromolecule degradation
BP0870	putative exported protein	Cell surface
BP0875	putative exported protein	Cell surface
BP0876	putative lipoprotein	Cell surface
BP0887	conserved hypothetical protein	Conserved hypothetical
BP0888	GntR-family transcriptional regulator	Regulation
BP0890	putative acyl-CoA carboxylase (Pseudogene)	Pseudogenes
BP0893	hypothetical protein	Unknown
BP0894	putative mannose-6-phosphate isomerase	Small molecule degradation
BP0895	conserved hypothetical protein	Conserved hypothetical
BP0900	probable oxidoreductase	Miscellaneous
BP0904	serine/threonine protein phosphatase 1	Regulation
BP0905	penicillin-binding protein 1A	Cell surface
BP0906	putative peptidase	Macromolecule degradation
BP0907	putative lipoprotein (Pseudogene)	Pseudogenes
BP0946	p-protein [includes: chorismate mutase and prephenate dehydratase]	Amino acid biosynthesis
BP0947	prephenate dehydrogenase	Amino acid biosynthesis
BP0948	3-phosphoshikimate 1-carboxyvinyltransferase	Amino acid biosynthesis
BP0949	cytidylate kinase	central/intermediary metabolism
BP0953	putative membrane protein	Cell surface
BP0955	ADP-L-glycero-D-manno-heptose-6-epimerase	Macromolecule synthesis/modification
BP0960	histone deacetylase family protein	Miscellaneous
BP0961	electron transfer flavoprotein beta-subunit	Energy metabolism
BP0962	electron transfer flavoprotein alpha-subunit	Energy metabolism
BP0965	antioxidant protein	Protection responses
BP0976	conserved hypothetical protein	Conserved hypothetical
BP0977	probable oxidoreductase	Miscellaneous
BP0984	acriflavine resistance protein a precursor (Pseudogene)	Pseudogenes
BP0986	probable outer membrane lipoprotein	Cell surface
BP0991	two-component response regulator	Regulation
BP0993	pyruvate dehydrogenase E1 component	Energy metabolism
BP0994	dihydrolipoamide acetyltransferase component of pyruvate dehydrogenase complex	Energy metabolism
BP0995	dihydrolipoamide dehydrogenase	Energy metabolism
BP0999	transketolase 1	Small molecule degradation
BP1000	glyceraldehyde-3-phosphate dehydrogenase	Energy metabolism
BP1001	phosphoglycerate kinase	Energy metabolism
BP1002	enoyl-[acyl-carrier-protein] reductase [NADH]	Fatty acid metabolism
BP1003	acetate kinase	Small molecule degradation
BP1004	phosphate acetyl/butaryl transferase	Miscellaneous
BP1005	conserved hypothetical protein	Conserved hypothetical
BP1006	probable glutathione S-transferase	Miscellaneous
BP1011	curved DNA-binding protein	Cell processes
BP1015	molybdopterin biosynthesis protein	Cofactor biosynthesis
BP1016	putative exported protein	Cell surface
BP1018	hypothetical protein	Unknown
BP1022	flagellar transcriptional activator FlbB	Regulation
BP1032	protein-glutamate methylesterase	Cell processes
BP1033	chemotaxis protein CheY	Cell processes
BP1034	chemotaxis protein CheZ	Cell processes
BP1046	protein-export membrane protein	Transport/binding proteins
BP1049	queuine tRNA-ribosyltransferase	Macromolecule synthesis/modification
BP1050	S-adenosylmethionine:tRNA ribosyltransferase-isomerase	Macromolecule synthesis/modification
BP1051	probable D-alanyl-D-alanine carboxypeptidase	Cell surface
BP1056	putative membrane protein	Cell surface
BP1057	putative membrane protein	Cell surface
BP1062	probable aminotransferase	Miscellaneous
BP1068	phosphate transport ATP-binding protein	central/intermediary metabolism
BP1070	phosphate transport system permease protein	central/intermediary metabolism
BP1071	phosphate-binding periplasmic protein precursor	central/intermediary metabolism
BP1072	polyphosphate kinase	central/intermediary metabolism
BP1074	conserved hypothetical protein	Conserved hypothetical
BP1085	conserved hypothetical protein	Conserved hypothetical
BP1089	putative membrane protein	Cell surface
BP1091	probable two-component response regulator	Regulation
BP1102	lysyl-tRNA synthetase	Macromolecule synthesis/modification
BP1103	probable short chain dehydrogenase	Miscellaneous
BP1106	putative exported protein	Cell surface
BP1110	serine protease	Pathogenicity
BP1119	serotype 2 fimbrial subunit precursor	Pathogenicity
BP1120	NADP-dependent malic enzyme	central/intermediary metabolism
BP1124	2-oxoglutarate dehydrogenase E1 component	Energy metabolism
BP1125	dihydrolipoamide succinyltransferase component of 2-oxoglutarate dehydrogenase complex	Energy metabolism
BP1126	2-oxoglutarate dehydrogenase complex, E3 component	Energy metabolism
BP1127	conserved hypothetical protein	Conserved hypothetical
BP1144	transcription accessory protein	Macromolecule synthesis/modification
BP1161	putative racemase	Miscellaneous
BP1162	probable LysR-family transcriptional regulator	Regulation
BP1163	probable short-chain dehydrogenase	Miscellaneous
BP1167	putative adolase	Miscellaneous
BP1181	amino acids ABC transporter, ATP-binding protein	Transport/binding proteins
BP1182	amino acids ABC transporter, permease protein	Transport/binding proteins
BP1183	amino acids ABC transporter, permease protein	Transport/binding proteins
BP1184	probable solute-binding protein	Transport/binding proteins
BP1186	putative aldolase	Miscellaneous
BP1188A	hypothetical protein	Unknown
BP1189	lipoprotein	Cell surface
BP1191	putative RNA polymerase sigma factor	Macromolecule synthesis/modification
BP1193	conserved hypothetical protein	Conserved hypothetical
BP1195	ferredoxin	Energy metabolism
BP1198	ATP-dependent protease, ATPase subunit	Macromolecule degradation
BP1200	autotransporter (pseudogene)	Pseudogenes
BP1201	tracheal colonization factor precursor	Pathogenicity
BP1202	TetR-family transcriptional regulator	Regulation
BP1206	LysR-family transcriptional regulator	Regulation
BP1207	N-acyl-D-glutamate deacylase	central/intermediary metabolism
BP1211	putative exported protein	Cell surface
BP1236	FkbP-type peptidyl-prolyl cis-trans isomerase	Cell processes
BP1237	putative drug tolerance protein	Protection responses
BP1238	putative glutathione-S-transferase	Small molecule degradation
BP1239	conserved hypothetical protein	Conserved hypothetical
BP1246	N utilization substance protein A	Macromolecule synthesis/modification
BP1253	putative exported protein	Cell surface
BP1258	L-serine dehydratase 1	Small molecule degradation
BP1259	conserved hypothetical protein	Conserved hypothetical
BP1265	putative membrane protein	Cell surface
BP1266	topoisomerase IV subunit A	Macromolecule synthesis/modification
BP1269	C-terminal region of a putative membrane protein (Pseudogene)	Pseudogenes
BP1272	putative aspartate racemase (Pseudogene)	Pseudogenes
BP1281	glycerol-3-phosphate-binding periplasmic protein precursor	Transport/binding proteins
BP1285	leu/ile/val-binding protein precursor	Transport/binding proteins
BP1288	putative membrane protein (Pseudogene)	Pseudogenes
BP1290	conserved hypothetical protein	Conserved hypothetical
BP1298	conserved hypothetical protein	Conserved hypothetical
BP1300	putative glutathione transferase	Miscellaneous
BP1303	conserved hypothetical protein (Pseudogene)	Pseudogenes
BP1304	conserved hypothetical protein	Conserved hypothetical
BP1305	conserved hypothetical protein	Unknown
BP1307	putative bacterioferritin comigratory protein	Miscellaneous
BP1310	putative membrane protein (Pseudogene)	Pseudogenes
BP1312	putative metalloprotease (Pseudogene)	Pseudogenes
BP1320	conserved hypothetical protein	Conserved hypothetical
BP1322	two-component sensor histidine kinase (Pseudogene)	Pseudogenes
BP1342	conserved hypothetical protein	Conserved hypothetical
BP1343	iron utilization protein (Pseudogene)	Pseudogenes
BP1344	autotransporter	Pathogenicity
BP1347	putative reductase	Miscellaneous
BP1372	flagella basal body P-ring formation protein	Cell processes
BP1376	flagellar hook protein FlgE	Cell processes
BP1385	methyl-accepting chemotaxis protein II	Cell processes
BP1386	methyl-accepting chemotaxis protein (Pseudogene)	Pseudogenes
BP1393	flagellar motor switch protein FliN	Cell processes
BP1395	flagellar protein FliL	Cell processes
BP1402	flagellar motor switch protein FliG	Cell processes
BP1405	hypothetical protein	Unknown
BP1416A	putative multiple antibiotic resistance protein (Pseudogene)	Pseudogenes
BP1421	uridylate kinase	central/intermediary metabolism
BP1422	ribosome recycling factor	Macromolecule synthesis/modification
BP1423	undecaprenyl pyrophosphate synthetase	Cofactor biosynthesis
BP1427	probable surface antigen	Cell surface
BP1428	putative outer membrane protein	Cell surface
BP1434	putative RNA methyltransferase	Macromolecule synthesis/modification
BP1435	conserved hypothetical protein	Conserved hypothetical
BP1440	putative membrane protein	Cell surface
BP1441	probable membrane protein	Cell surface
BP1445	probable acyl-CoA dehydrogenase	Miscellaneous
BP1446	enoly-CoA hydratase	Small molecule degradation
BP1447	3-hydroxyisobutyrate dehydrogenase	Small molecule degradation
BP1451	transaldolase B	central/intermediary metabolism
BP1453	carbamoyl-phosphate synthase large chain	Amino acid biosynthesis
BP1462	chorismate synthase	Amino acid biosynthesis
BP1465	molybdopterin biosynthesis protein	Cofactor biosynthesis
BP1467	putative iron sulfur binding protein	Miscellaneous
BP1481	3-isopropylmalate dehydratase large subunit	Amino acid biosynthesis
BP1482	3-isopropylmalate dehydratase small subunit	Amino acid biosynthesis
BP1483	3-isopropylmalate dehydrogenase	Amino acid biosynthesis
BP1484	aspartate-semialdehyde dehydrogenase	Amino acid biosynthesis
BP1489	putative membrane protein	Cell surface
BP1492	hypothetical protein	Unknown
BP1495	conserved hypothetical protein	Conserved hypothetical
BP1499	glutathione synthetase	Cofactor biosynthesis
BP1500	putative IIa component of sugar transport PTS system	Transport/binding proteins
BP1501	phosphocarrier protein HPr	Transport/binding proteins
BP1502	phosphoenolpyruvate-protein phosphotransferase	Transport/binding proteins
BP1503	conserved hypothetical protein	Conserved hypothetical
BP1504	osmotically inducible protein C (Pseudogene)	Pseudogenes
BP1506	putative exported protein	Cell surface
BP1510	putative ATP-binding component of ABC transporter	Transport/binding proteins
BP1512	conserved hypothetical protein	Conserved hypothetical
BP1519	fructose-bisphosphate aldolase	Energy metabolism
BP1520	conserved hypothetical protein	Conserved hypothetical
BP1530	putative transcriptional regulator	Regulation
BP1536	conserved hypothetical protein	Conserved hypothetical
BP1537	glutaryl-CoA dehydrogenase	Small molecule degradation
BP1538	putative acetolactate synthase large subunit	Amino acid biosynthesis
BP1541	conserved hypothetical protein	Conserved hypothetical
BP1543	conserved hypothetical protein	Conserved hypothetical
BP1547	conserved hypothetical protein	Conserved hypothetical
BP1559	putative exported protein (Pseudogene)	Pseudogenes
BP1560	conserved hypothetical protein	Conserved hypothetical
BP1561	putative exported protein	Cell surface
BP1563	putative chromate reductase	Miscellaneous
BP1565	conserved hypothetical protein	Conserved hypothetical
BP1568	serotype 3 fimbrial subunit precursor	Pathogenicity
BP1569	putative lipoprotein	Cell surface
BP1573	glutamine-binding periplasmic protein precursor	Transport/binding proteins
BP1580	probable cytochrome C	Energy metabolism
BP1585	hypothetical protein	Unknown
BP1586	conserved hypothetical protein	Conserved hypothetical
BP1596	glutamine synthetase	Amino acid biosynthesis
BP1598	nitrogen regulation protein NR(I)	Regulation
BP1600	conserved hypothetical protein	Conserved hypothetical
BP1605	putative iron binding protein	Transport/binding proteins
BP1606	ferredoxin--NADP reductase	Energy metabolism
BP1608	putative membrane protein (Pseudogene)	Pseudogenes
BP1609	probable aldehyde reductase	Miscellaneous
BP1610	putative autotransporter (Pseudogene)	Pseudogenes
BP1613	probable LysR-family transcriptional regulator	Regulation
BP1626	capsular polysaccharide biosynthesis protein	Cell surface
BP1627	capsular polysaccharide biosynthesis protein	Cell surface
BP1637	putative exported protein	Cell surface
BP1649	high-affinity branched-chain amino acid transport, ATP-binding protein	Transport/binding proteins
BP1664	glutathione S-transferase	Miscellaneous
BP1665	alpha-ketoglutarate-dependent 2,4-dichlorophenoxyacetate dioxygenase	Small molecule degradation
BP1681	arsenate reductase (Pseudogene)	Pseudogenes
BP1685	putative exported protein	Cell surface
BP1690	putative exported protein (Pseudogene)	Pseudogenes
BP1701	muramoyltetrapeptide carboxypeptidase	Cell surface
BP1702	probable enoyl-CoA hydratase/isomerase	Miscellaneous
BP1705	putative exported protein	Cell surface
BP1712	conserved hypothetical protein	Conserved hypothetical
BP1714	conserved hypothetical protein (Pseudogene)	Pseudogenes
BP1716	probable glycoprotease	Macromolecule degradation
BP1721	putative peptidase	Macromolecule degradation
BP1723	putative exported protein	Cell surface
BP1725	conserved hypothetical protein	Conserved hypothetical
BP1726	MerR-family transcriptional regulator	Regulation
BP1727	putative exported protein	Cell surface
BP1728	putative glutaredoxin	Cofactor biosynthesis
BP1729	putative pyridine nucleotide-disulfide oxidoreductase	Miscellaneous
BP1730	conserved hypothetical protein	Conserved hypothetical
BP1731	glycerophosphoryl diester phosphodiesterase	Small molecule degradation
BP1733	acyl-CoA thioesterase I precursor	Small molecule degradation
BP1734	probable ATP-binding ABC transporter protein (Pseudogene)	Pseudogenes
BP1736	putative exported protein	Cell surface
BP1738	conserved hypothetical protein	Conserved hypothetical
BP1746	putative peptidoglycan-binding protein	Cell surface
BP1749	putative AsnC-family transcriptional regulator	Regulation
BP1750	putative membrane protein	Cell surface
BP1753	isoleucyl-tRNA synthetase	Macromolecule synthesis/modification
BP1759	DNA helicase II	Macromolecule synthesis/modification
BP1763	succinyl-diaminopimelate desuccinylase	central/intermediary metabolism
BP1764	2,3,4,5-tetrahydropyridine-2-carboxylate N-succinyltransferase	central/intermediary metabolism
BP1767	autotransporter	Pathogenicity
BP1774	trigger factor	Cell processes
BP1775	ATP-dependent Clp protease proteolytic subunit	Macromolecule degradation
BP1776	ATP-dependent Clp protease ATP-binding subunit	Macromolecule degradation
BP1777	ATP-dependent protease La	Macromolecule degradation
BP1795	aromatic-amino-acid aminotransferase	Amino acid biosynthesis
BP1806	hypothetical protein	Unknown
BP1817	CDP-6-deoxy-L-threo-D-glycero-4-hexulose-3-dehy drase reductase	Cell surface
BP1819	glycerol-3-phosphate-binding periplasmic protein precursor	Transport/binding proteins
BP1820	probable LysR-family transcriptional regulator	Regulation
BP1826	probable ATP-binding component of ABC transporter	Transport/binding proteins
BP1828	putative lipoprotein (Pseudogene)	Pseudogenes
BP1837	conserved hypothetical protein	Conserved hypothetical
BP1838	putative exported protein	Macromolecule degradation
BP1839	30S ribosomal protein S16	Ribosome constituents
BP1840	16S rRNA processing protein	Macromolecule synthesis/modification
BP1845	conserved hypothetical protein	Conserved hypothetical
BP1848	DNA polymerase III, delta subunit	Macromolecule synthesis/modification
BP1849	conserved hypothetical protein	Conserved hypothetical
BP1852	putative glutamine-binding periplasmic protein precursor	Transport/binding proteins
BP1857	glutamate dehydrogenase	Small molecule degradation
BP1874	putative amidase	Miscellaneous
BP1877	virulence sensor protein	Pathogenicity
BP1883	fimbrial adhesin	Pathogenicity
BP1884	hemolysin activator-like protein	Pathogenicity
BP1895	5-oxoprolinase	central/intermediary metabolism
BP1898	putative membrane protein	Cell surface
BP1905	UDP-2,3-diacylglucosamine hydrolase	Macromolecule synthesis/modification
BP1906	peptidyl-prolyl cis-trans isomerase B	Cell processes
BP1907	putative exported protein	Cell surface
BP1931	probable NADH-dependent flavin oxidoreductase	Miscellaneous
BP1937	hypothetical protein	Unknown
BP1940	N-ethylmaleimide reductase	central/intermediary metabolism
BP1944	putative hemin storage protein	Adaptation
BP1945	putative membrane protein	Cell surface
BP1968	fusion between a transposase and a C-terminal portion of a regulatory protein (Pseudogene)	Pseudogenes
BP1969	putative LuxR-family transcriptional regulator	Regulation
BP1970	phosphoglucomutase	Macromolecule synthesis/modification
BP1971	putative glucose-6-phosphate isomerase	central/intermediary metabolism
BP1972	serine acetyltransferase	Amino acid biosynthesis
BP1976	succinate-semialdehyde dehydrogenase [NADP+]	Small molecule degradation
BP1977	4-aminobutyrate aminotransferase	Small molecule degradation
BP1981	putative magnesium transporter (Pseudogene)	Pseudogenes
BP1985	putative oligopeptide transport integral membrane protein	Transport/binding proteins
BP1986	putative ABC transporter, ATP-binding protein	Transport/binding proteins
BP1987	probable MarR-family transcriptional regulator	Regulation
BP2008	putative exported protein	Cell surface
BP2014	putative aconitate hydratase	Energy metabolism
BP2015	putative lipoprotein	Cell surface
BP2017	putative haloacid-type dehydrogenase	Miscellaneous
BP2019	putative lipoprotein	Cell surface
BP2020	hypothetical protein	Unknown
BP2021	putative aconitate hydratase	Energy metabolism
BP2030	putative LysR-family transcriptional activator	Regulation
BP2053	putative cyclopropane-fatty-acyl-phospholipid synthase (pseudogene)	Pseudogenes
BP2059	putative thiolase	Miscellaneous
BP2061	putative gntR-family transcriptional regulator	Regulation
BP2062	putative malonyl-CoA decarboxylase	Fatty acid metabolism
BP2063	conserved hypothetical protein	Miscellaneous
BP2064	putative malonyl-CoA synthetase (pseudogene)	Pseudogenes
BP2067	putative superoxide dismutase	Protection responses
BP2073	conserved hypothetical protein	Conserved hypothetical
BP2077	putative efflux system outer membrane component (Pseudogene)	Pseudogenes
BP2080	putative beta-hexosaminidase	Cell surface
BP2084	conserved hypothetical protein	Conserved hypothetical
BP2085	putative isocitrate lyase	central/intermediary metabolism
BP2088	putative ABC-transporter permease component (pseudogene)	Pseudogenes
BP2089	putative ABC-transporter permease component	Transport/binding proteins
BP2091	putative dioxygenase hydroxylase component	Small molecule degradation
BP2101	hypothetical protein (pseudogene)	Pseudogenes
BP2106	conserved hypothetical protein	Conserved hypothetical
BP2107	conserved hypothetical protein	Conserved hypothetical
BP2118	transposase (Pseudogene)	Pseudogenes
BP2120	glutathione reductase	central/intermediary metabolism
BP2124	conserved hypothetical protein	Conserved hypothetical
BP2125	putative lysR-family transcriptional regulator	Regulation
BP2131	conserved hypothetical protein	Conserved hypothetical
BP2139	putative lipoprotein	Cell surface
BP2140	putative membrane protein	Cell surface
BP2142	putative gntR-family transcriptional regulator	Regulation
BP2144	conserved hypothetical protein	Conserved hypothetical
BP2147	putative exported protein	Cell surface
BP2148	conserved hypothetical protein	Conserved hypothetical
BP2149	putative araC-family transcriptional regulator	Regulation
BP2151	putative oxidoreductase	Miscellaneous
BP2152	putative lysR-family transcriptional regulator	Regulation
BP2153	putative exported protein	Cell surface
BP2158	putative sigma-54-dependent transcriptional regulator	Regulation
BP2164	putative 8-amino-7-oxononanoate synthase	Cofactor biosynthesis
BP2184	RNA polymerase sigma factor 70	Macromolecule synthesis/modification
BP2190	putative inner membrane-anchored protein	Cell surface
BP2191	putative membrane protein	Cell surface
BP2194	histidinol-phosphate aminotransferase	Amino acid biosynthesis
BP2196	putative quinoprotein	Miscellaneous
BP2197	putative membrane protein	Cell surface
BP2198	histidyl-tRNA synthetase	Macromolecule synthesis/modification
BP2212	flavohemoprotein	Energy metabolism
BP2213	conserved hypothetical protein	Conserved hypothetical
BP2216	putative transcriptional regulator (MarR family)	Regulation
BP2218	putative aminotransferase	Miscellaneous
BP2225	putative phospholipase	Miscellaneous
BP2227	putative anti-sigma factor	Regulation
BP2234	putative RNA polymerase sigma factor	Macromolecule synthesis/modification
BP2235	putative type III secretion protein	Pathogenicity
BP2236	hypothetical protein	Pathogenicity
BP2252	putative outer protein B	Pathogenicity
BP2254	putative regulatory protein	Pathogenicity
BP2276	putative ABC transport permease	Transport/binding proteins
BP2280	putative sulfurtransferase	Miscellaneous
BP2282	heat shock protease	Adaptation
BP2283	quinone oxidoreductase	Cofactor biosynthesis
BP2284	conserved hypothetical integral membrane protein	Cell surface
BP2286	putative transcriptional regulator (MarR family)	Regulation
BP2298	aminobutyrate aminotransferase	Small molecule degradation
BP2299	conserved hypothetical protein	Conserved hypothetical
BP2300	putative acetylpolyamine aminohydrolase	Small molecule degradation
BP2301	putative amidohydrolase	Small molecule degradation
BP2304	putative 2-hydroxyacid dehydrogenase	Miscellaneous
BP2307	conserved ATP-binding protein	Miscellaneous
BP2308	conserved hypothetical protein	Conserved hypothetical
BP2309	phosphoribosylamine--glycine ligase	Ribonucleotide biosynthesis
BP2312	conserved hypothetical protein	Conserved hypothetical
BP2314	Maf-like protein	Miscellaneous
BP2315	autotransporter	Pathogenicity
BP2317	putative ribonuclease	Cell division
BP2325	putative transferase	Macromolecule synthesis/modification
BP2329	putative transferase	Macromolecule synthesis/modification
BP2330	conserved hypothetical protein	Conserved hypothetical
BP2332	DNA polymerase III alpha subunit	Macromolecule synthesis/modification
BP2338	putative transport protein	Transport/binding proteins
BP2340	putative acyl-CoA dehydrogenase	Miscellaneous
BP2343	putative methypurine-DNA glycosylase	Macromolecule synthesis/modification
BP2344	conserved hypothetical protein	Conserved hypothetical
BP2347	putative polyamine transport ATP-binding protein	Transport/binding proteins
BP2351	putative inner membrane transport permease	Transport/binding proteins
BP2358	citrate synthase	Energy metabolism
BP2359	conserved hypothetical protein	Conserved hypothetical
BP2360	succinate dehydrogenase iron-sulfur protein	Energy metabolism
BP2361	succinate dehydrogenase flavoprotein subunit	Energy metabolism
BP2362	succinate dehydrogenase hydrophobic membrane anchor protein	Energy metabolism
BP2387	conserved hypothetical protein	Conserved hypothetical
BP2388	2-dehydro-3-deoxyphosphooctonate aldolase	Macromolecule synthesis/modification
BP2389	CTP synthase	Ribonucleotide biosynthesis
BP2391	putative aminopeptidase	Macromolecule degradation
BP2393	probable D-aminopeptidase	Conserved hypothetical
BP2396	putative binding-protein-dependent transport periplasmic protein	Transport/binding proteins
BP2401	putative coenzyme A transferase subunit (Pseudogene)	Pseudogenes
BP2405	putative cytochrome p450 oxidoreductase	Energy metabolism
BP2406	conserved hypothetical protein	Conserved hypothetical
BP2407	low-specificity L-threonine aldolase	Amino acid biosynthesis
BP2421	cytosol aminopeptidase	Macromolecule synthesis/modification
BP2422	conserved hypothetical protein	Conserved hypothetical
BP2424	putative integral membrane protein	Cell surface
BP2426	conserved hypothetical protein	Unknown
BP2427	threonine synthase (pseudogene)	Pseudogenes
BP2431	ribonuclease III	Macromolecule degradation
BP2434	serine protease	Macromolecule degradation
BP2435	putative sigma factor regulatory protein	Regulation
BP2436	putative membrane protein	Cell surface
BP2437	RNA polymerase sigma factor	Macromolecule synthesis/modification
BP2451	putative membrane transport protein	Transport/binding proteins
BP2452	conserved hypothetical protein	Conserved hypothetical
BP2458	alcaligin biosynthesis protein	Adaptation
BP2461	Transcriptional regulator	Regulation
BP2464	possible membrane efflux protein	Transport/binding proteins
BP2468	Virulence protein	Pathogenicity
BP2470	seryl-tRNA synthetase	Macromolecule synthesis/modification
BP2473	putative cell division protein	Cell division
BP2483	Two component sensor protein	Regulation
BP2486	putative exported protein	Cell surface
BP2488	isocitrate dehydrogenase [NADP]	Energy metabolism
BP2490	putative cytochrome	Energy metabolism
BP2497	putative zinc protease	Macromolecule degradation
BP2498	molecular chaperone	Cell processes
BP2499	molecular chaperone	Cell processes
BP2502	hypothetical protein	Unknown
BP2503	ferrochelatase	Cofactor biosynthesis
BP2504	heat-inducible transcription repressor	Regulation
BP2508	outer membrane lipoprotein	Macromolecule synthesis/modification
BP2509	dihydrodipicolinate reductase	Amino acid biosynthesis
BP2511	putative hydrolase	Miscellaneous
BP2512	conserved hypothetical protein	Conserved hypothetical
BP2520	putative LysR-family regulatory protein	Regulation
BP2532	conserved hypothetical protein	Conserved hypothetical
BP2536	putative uroporphyrinogen-III synthase	Cofactor biosynthesis
BP2540	succinyl-CoA synthetase, alpha chain	Energy metabolism
BP2541	Succinyl-CoA synthetase, beta chain	Energy metabolism
BP2543	5-methyltetrahydropteroyltriglutamate--homocyst eine methyltransferase	Amino acid biosynthesis
BP2544	transcriptional regulatory protein	Regulation
BP2545	RecX-family regulatory protein	Regulation
BP2547	two-component response regulatory protein	Regulation
BP2563	putative integral membrane protein	Cell surface
BP2565	entericidin A anti-toxin precursor	Protection responses
BP2567	hypothetical protein	Unknown
BP2570	putative exported protein	Cell surface
BP2571	putative transcriptional regulatory protein	Regulation
BP2573	phenylalanyl-tRNA synthetase beta chain	Macromolecule synthesis/modification
BP2574	phenylalanyl-tRNA synthetase alpha chain	Macromolecule synthesis/modification
BP2583	hypothetical protein	Unknown
BP2596	conserved hypothetical protein	Conserved hypothetical
BP2600	putative membrane protein	Cell surface
BP2601	probable alcohol dehydrogenase	central/intermediary metabolism
BP2604	putative LysR-family transcriptional regulatory protein	Regulation
BP2609	conserved hypothetical protein	Miscellaneous
BP2610	putative solute transport protein	Transport/binding proteins
BP2611	probable transcriptional regulator (pseudogene)	Pseudogenes
BP2623	DNA-binding protein	Miscellaneous
BP2626	conserved hypothetical protein	Conserved hypothetical
BP2642A	probable ATP-binding ABC transporter protein (pseudogene)	Pseudogenes
BP2643	glycerol-3-phosphate regulon repressor protein	Regulation
BP2644	putative glycerol-3-phosphate dehydrogenase	Energy metabolism
BP2648	conserved hypothetical protein	Conserved hypothetical
BP2649	conserved hypothetical protein	Conserved hypothetical
BP2650	conserved hypothetical protein (pseudogene)	Pseudogenes
BP2651	conserved hypothetical protein	Conserved hypothetical
BP2654	probable dihydrodipicolinate synthase	Amino acid biosynthesis
BP2655	putative IclR-family regulatory protein	Regulation
BP2659	conserved hypothetical protein	Conserved hypothetical
BP2660	conserved hypothetical protein	Miscellaneous
BP2664	putative MarR-family transcriptional regulator	Regulation
BP2674	fimbrial protein	Pathogenicity
BP2677	probable enoyl-CoA hydratase	Small molecule degradation
BP2678	putative oxidoreductase	Miscellaneous
BP2684	phenylacetic acid degradation protein	Small molecule degradation
BP2693	putative gamma-glutamyltranspeptidase	Macromolecule degradation
BP2694	LysR-family transcriptional regulator	Regulation
BP2699	nitrogen regulatory protein	Regulation
BP2701	putative membrane transport protein	Transport/binding proteins
BP2703	hypothetical protein	Miscellaneous
BP2710	molybdopterin converting factor	Cofactor biosynthesis
BP2713	putative hydrolase	Miscellaneous
BP2714	putative lipoprotein	Cell surface
BP2717	putative exported protein	Cell surface
BP2718	biotin synthase	Cofactor biosynthesis
BP2720	putative TetR-family transcriptional regulator	Regulation
BP2722	putative membrane transport ATPase	Transport/binding proteins
BP2723	putative MerR-family transcriptional regulator	Regulation
BP2731	putative ubiquinol oxidase subunit II (pseudogene)	Pseudogenes
BP2735	conserved hypothetical protein	Conserved hypothetical
BP2741	putative TetR-family transcriptional regulator	Regulation
BP2742	putative membrane transport protein	Transport/binding proteins
BP2743	putative ABC transport protein, ATP-binding component	Transport/binding proteins
BP2746	putative ABC transport protein, inner membrane component	Transport/binding proteins
BP2747	putative ABC transport solute-binding protein	Transport/binding proteins
BP2750	lipoprotein	Cell surface
BP2753	ATP-dependent clp protease ATP-binding	Macromolecule degradation
BP2755	putative exported protein	Cell surface
BP2759	putative thiolase	central/intermediary metabolism
BP2772	putative membrane protein	Cell surface
BP2784	homoserine dehydrogenase	Amino acid biosynthesis
BP2787	hypothetical protein	Miscellaneous
BP2788	hypothetical protein	Miscellaneous
BP2791	DNA helicase	Macromolecule synthesis/modification
BP2799	probable geranyltranstransferase	central/intermediary metabolism
BP2808	putative integral membrane protein	Cell surface
BP2809	putative transcriptional regulator	Regulation
BP2813	inositol monophosphatase-family protein	Miscellaneous
BP2820	putative alcohol dehydrogenase	central/intermediary metabolism
BP2822	conserved hypothetical protein	Conserved hypothetical
BP2823	conserved hypothetical protein	Conserved hypothetical
BP2824	conserved hypothetical protein	Conserved hypothetical
BP2825	putative GntR-family transcriptional regulatory protein	Regulation
BP2826	putative exported protein	Cell surface
BP2827	hypothetical protein	Unknown
BP2834	transposase (Pseudogene)	Pseudogenes
BP2835	ABC transport protein, Solute-binding component	Transport/binding proteins
BP2836	putative DNA-binding protein	Miscellaneous
BP2838	putative hydrolase	Macromolecule synthesis/modification
BP2840	putative TetR-family transcriptional regulator	Regulation
BP2841	putative short-chain dehydrogenase	central/intermediary metabolism
BP2842A	transposase (pseudogene)	Pseudogenes
BP2850	probable 3-methyl-2-oxobutanoate hydroxymethyltransferase	Cofactor biosynthesis
BP2851	outer membrane porin protein precursor	Transport/binding proteins
BP2856	conserved hypothetical protein	Conserved hypothetical
BP2858	aromatic-amino-acid aminotransferase	Amino acid biosynthesis
BP2863	conserved hypothetical protein	Unknown
BP2864	putative alcohol dehydrogenase	central/intermediary metabolism
BP2865	conserved hypothetical protein	Unknown
BP2867	putative ABC transport proteins, ATP-binding component	Transport/binding proteins
BP2869	conserved hypothetical protein	Unknown
BP2870	putative acid CoA ligase	Miscellaneous
BP2871	hypothetical protein	Unknown
BP2873	putative exported protein	Cell surface
BP2874	riboflavin synthase alpha chain	Cofactor biosynthesis
BP2875	amidase	central/intermediary metabolism
BP2882	putative lysR-family transcriptional regulator	Regulation
BP2886	putative lipoprotein	Cell surface
BP2889	putative ccytochrome	Energy metabolism
BP2895	putative exported protein	Cell surface
BP2898	NAD(P) transhydrogenase, subunit alpha part 2 (pseudogene)	Pseudogenes
BP2899	NAD(P) transhydrogenase subunit beta (pseudogene)	Pseudogenes
BP2908	phospho-2-dehydro-3-deoxyheptonate aldolase, Phe-sensitive	Amino acid biosynthesis
BP2909	conserved hypothetical protein	Conserved hypothetical
BP2924	putative exported protein	Cell surface
BP2925	conserved hypothetical protein	Conserved hypothetical
BP2926	conserved hypothetical protein	Conserved hypothetical
BP2927	putative integral membrane protein	Cell surface
BP2934	putative two component system response regulator	Regulation
BP2946	putative arsR-family transcriptional regulator	Regulation
BP2950	putative AraC-family transcriptional regulator (pseudogene)	Pseudogenes
BP2951	conserved hypothetical protein	Conserved hypothetical
BP2952	serine hydroxymethyltransferase	central/intermediary metabolism
BP2953	conserved hypothetical protein	Conserved hypothetical
BP2959	putative integral membrane protein	Cell surface
BP2960	N-acetyl-gamma-glutamyl-phosphate reductase	Amino acid biosynthesis
BP2964	conserved hypothetical protein	Miscellaneous
BP2973	probable ATP-dependent RNA helicase	Ribosome constituents
BP2978	glutamyl-tRNA synthetase	Macromolecule synthesis/modification
BP2980	putative lipoprotein	Cell surface
BP2983	ribonucleoside-diphosphate reductase alpha chain	Macromolecule synthesis/modification
BP2985	histone protein	Regulation
BP2986	putative integral membrane protein	Cell surface
BP2989	hypothetical protein	Unknown
BP3002	conserved hypothetical protein	Conserved hypothetical
BP3004	shikimate 5-dehydrogenase	Amino acid biosynthesis
BP3008	glutamate uptake regulatory protein	Regulation
BP3011	hypothetical protein	Unknown
BP3012	putative membrane protein	Cell surface
BP3018	cell division protein FtsZ	Cell division
BP3035	dihydroorotase	Ribonucleotide biosynthesis
BP3040	putative hemolysin	Pathogenicity
BP3043	dihydroxy-acid dehydratase	Amino acid biosynthesis
BP3044	prolipoprotein diacylglyceryl transferase	Macromolecule synthesis/modification
BP3054	C-terminal region of acyl carrier protein phosphodiesterase (Pseudogene)	Pseudogenes
BP3056	uracil-DNA glycosylase	Macromolecule synthesis/modification
BP3057	putative ATP-dependent RNA helicase	Macromolecule synthesis/modification
BP3058	conserved hypothetical protein	Conserved hypothetical
BP3061	5-formyltetrahydrofolate cyclo-ligase family protein	Miscellaneous
BP3066	putative methylenetetrahydrofolate reductase	Amino acid biosynthesis
BP3067	putative membrane protein	Cell surface
BP3068	adenosylhomocysteinase	central/intermediary metabolism
BP3070	conserved hypothetical protein	Conserved hypothetical
BP3071	S-adenosylmethionine synthetase	central/intermediary metabolism
BP3074	diaminopimelate epimerase	Amino acid biosynthesis
BP3075	conserved hypothetical protein	Conserved hypothetical
BP3080	putative periplasmic solute binding protein	Cell surface
BP3100	putative membrane protein	Cell surface
BP3101	putative TonB-dependent receptor (Pseudogene)	Pseudogenes
BP3110	probable MerR-family transcriptional regulator	Regulation
BP3112	putative integrase (Pseudogene)	Pseudogenes
BP3115	conserved hypothetical protein	Conserved hypothetical
BP3126	4-diphosphocytidyl-2-C-methyl-D-erythritol kinase	Cofactor biosynthesis
BP3133	putative LysR-family transcriptional regulator	Regulation
BP3152	conserved hypothetical protein	Conserved hypothetical
BP3162	putative ABC transpoter ATP-binding protein (pseudogene)	Pseudogenes
BP3163	conserved hypothetical protein	Conserved hypothetical
BP3165	N-terminal region of a putative aldehyde dehydrogenase (Pseudogene)	Pseudogenes
BP3168	urease alpha subunit	Small molecule degradation
BP3181	conserved hypothetical protein	Conserved hypothetical
BP3182	conserved hypothetical protein	Conserved hypothetical
BP3190	TetR-family transcriptional regulator	Regulation
BP3195	putative ABC transporter ATP-binding protein	Transport/binding proteins
BP3199	conserved hypothetical protein	Conserved hypothetical
BP3200	putative thiolase (Pseudogene)	Pseudogenes
BP3217	conserved hypothetical protein	Conserved hypothetical
BP3218	putative membrane protein	Cell surface
BP3219	putative exported protein	Cell surface
BP3222	two component response regulator	Regulation
BP3223	two-component sensor kinase	Regulation
BP3224	putative cytochrome oxidase	Energy metabolism
BP3231	osmotically inducible lipoprotein B precursor	Adaptation
BP3232	conserved hypothetical protein (Pseudogene)	Pseudogenes
BP3233	putative ABC transport ATP-binding subunit (pseudogene)	Pseudogenes
BP3235	hypothetical protein	Unknown
BP3245	putative conserved membrane protein	Cell surface
BP3248	conserved hypothetical protein	Conserved hypothetical
BP3249	putative inner membrane efflux protein	Transport/binding proteins
BP3261	indole-3-glycerol phosphate synthase	Amino acid biosynthesis
BP3262	anthranilate phosphoribosyltransferase	Amino acid biosynthesis
BP3263	anthranilate synthase component II	Amino acid biosynthesis
BP3264	anthranilate synthase component I	Amino acid biosynthesis
BP3265	putative phosphoglycolate phosphatase	Miscellaneous
BP3266	ribulose-phosphate 3-epimerase	Miscellaneous
BP3270	putative thiol:disulphide interchange protein (periplasmic)	Macromolecule synthesis/modification
BP3271	putative 2-hydroxyacid dehydrogenase	Miscellaneous
BP3276	conserved hypothetical protein	Conserved hypothetical
BP3277	putative enoyl-CoA hydratase	Miscellaneous
BP3281	putative inner membrane ATP synthase protein	Energy metabolism
BP3285	ATP synthase delta chain	Energy metabolism
BP3286	ATP synthase alpha chain	Energy metabolism
BP3287	ATP synthase gamma chain	Energy metabolism
BP3288	ATP synthase beta chain	Energy metabolism
BP3296	hypothetical protein	Unknown
BP3302	hypothetical protein	Unknown
BP3303	conserved hypothetical protein	Conserved hypothetical
BP3306	conserved hypothetical protein	Conserved hypothetical
BP3308	putative acyl-CoA dehydrogenase	Miscellaneous
BP3316	copper resistance protein	Adaptation
BP3317	putative enoyl-CoA hydratase/isomerase	Miscellaneous
BP3318	conserved hypothetical protein (Pseudogene)	Pseudogenes
BP3319	putative IclR-family transcriptional regulator	Regulation
BP3320	conserved hypothetical protein	Conserved hypothetical
BP3321	putative amidase	Miscellaneous
BP3322	putative binding-protein-dependent transport protein	Transport/binding proteins
BP3326	putative inner membrane protein	Cell surface
BP3330	putative peptidyl-prolyl cis-trans isomerase	Cell processes
BP3332	glycerate kinase	central/intermediary metabolism
BP3340	putative ABC transport inner membrane permease protein	Transport/binding proteins
BP3343	putative TolB-like translocation protein	Transport/binding proteins
BP3345	putative TolR-like translocation protein	Transport/binding proteins
BP3346	putative TolQ-like translocation protein	Transport/binding proteins
BP3352	phage-related conserved hypothetical protein	Conserved hypothetical
BP3355	phage-related conserved hypothetical protein	Phage-related or transposon-related
BP3363	phage-related conserved hypothetical protein	Phage-related or transposon-related
BP3368	phage-related conserved hypothetical protein	Unknown
BP3381	phage-related hypothetical protein	Unknown
BP3389	phage-related hypothetical protein	Conserved hypothetical
BP3405	outer membrane porin protein OmpQ	Pathogenicity
BP3437	conserved hypothetical protein	Conserved hypothetical
BP3439	dermonecrotic toxin	Pathogenicity
BP3441	conserved hypothetical protein	Conserved hypothetical
BP3456	NADP-dependent malic enzyme	central/intermediary metabolism
BP3460	ABC transporter ATP-binding protein	Transport/binding proteins
BP3461	bacterial extracellular solute-binding protein (pseudogene)	Pseudogenes
BP3462	conserved hypothetical protein	Conserved hypothetical
BP3463	LysR family regulatory protein	Regulation
BP3465	conserved hypothetical protein	Conserved hypothetical
BP3466	putative ArsR family transcriptional regulator	Regulation
BP3489	conserved hypothetical protein	Conserved hypothetical
BP3494	serum resistance protein	Pathogenicity
BP3495	60 kDa chaperonin	Cell processes
BP3496	10 kDa chaperonin	Cell processes
BP3514	conserved hypothetical protein (Pseudogene)	Pseudogenes
BP3515	conserved hypothetical protein	Conserved hypothetical
BP3527	putative tRNA/rRNA methyltransferase	Miscellaneous
BP3529	conserved hypothetical protein	Conserved hypothetical
BP3545	hypothetical protein	Conserved hypothetical
BP3550	AraC-family regulatory protein	Regulation
BP3552	alkyl hydroperoxide reductase	Protection responses
BP3561	putative peptidyl-prolyl cis-trans isomerase	Cell surface
BP3563	putative intracellular septation protein	Cell surface
BP3578	endonuclease III	Macromolecule synthesis/modification
BP3580	intracellular PHB depolymerase	Macromolecule degradation
BP3586	conserved hypothetical protein	Conserved hypothetical
BP3590	tryptophan synthase alpha chain	Amino acid biosynthesis
BP3592	putative lipoprotein (pseudogene)	Unknown
BP3596	periplasmic binding protein	Cell surface
BP3602	putative cytidylyltransferase	Miscellaneous
BP3604	putative membrane protein	Cell surface
BP3610	elongation factor G	Macromolecule synthesis/modification
BP3615	50S ribosomal protein L23	Ribosome constituents
BP3616	50S ribosomal protein L2	Ribosome constituents
BP3617	30S ribosomal protein S19	Ribosome constituents
BP3618	50S ribosomal protein L22	Ribosome constituents
BP3619	30S ribosomal protein S3	Ribosome constituents
BP3621	50S ribosomal protein L29	Ribosome constituents
BP3623	putative hydrolase	Miscellaneous
BP3624	putative aldehyde dehydrogenase	Small molecule degradation
BP3626	50S ribosomal protein L14	Ribosome constituents
BP3629	30S ribosomal protein S14	Ribosome constituents
BP3630	30S ribosomal protein S8	Ribosome constituents
BP3631	50S ribosomal protein L6	Ribosome constituents
BP3632	50S ribosomal protein L18	Ribosome constituents
BP3633	30S ribosomal protein S5	Ribosome constituents
BP3634	50S ribosomal protein L30	Ribosome constituents
BP3640	30S ribosomal protein S11	Ribosome constituents
BP3644	histidine triad protein (pseudogene)	Pseudogenes
BP3645	putative periplasmic divalent cation tolerance protein	Protection responses
BP3646	thiol:disulfide interchange protein	Cell processes
BP3648	putative delta-aminolevulinic acid dehydratase	Cofactor biosynthesis
BP3652	putative cytochrome c asssembly protein	Energy metabolism
BP3653	diaminopimelate decarboxylase	Amino acid biosynthesis
BP3656	shikimate kinase I	Amino acid biosynthesis
BP3659	putative glutathione S-transferase	Miscellaneous
BP3667	GntR family regulatory proteins	Regulation
BP3668	transcriptional regulator	Regulation
BP3676	ABC transporter ATP-binding protein	Transport/binding proteins
BP3680	malate synthase G	Small molecule degradation
BP3682	putative dehydrogenase	Miscellaneous
BP3686	conserved hypothetical protein	Conserved hypothetical
BP3692	putative methyltransferase	Miscellaneous
BP3696	putative exported protein	Cell surface
BP3699	GntR family transcriptional regulator	Regulation
BP3712	putative oxidoreductase	Miscellaneous
BP3713	putative amidase	Small molecule degradation
BP3723	hypothetical protein	Unknown
BP3730	UDP-N-acetylglucosamine synthesis bifunctional protein	Macromolecule synthesis/modification
BP3731	conserved hypothetical protein	Unknown
BP3732	putative exported protein	Cell surface
BP3736	putative cytochrome oxidase assembly protein	Cell surface
BP3748	RNA polymerase sigma-32 factor	Macromolecule synthesis/modification
BP3753	glutamate synthase [NADPH] large chain precursor	Amino acid biosynthesis
BP3754	glutamate synthase [NADPH] small chain precursor	Amino acid biosynthesis
BP3756	putative exported protein	Cell surface
BP3761	putative exported protein	Cell surface
BP3767	putative ATP phosphoribosyltransferase	Amino acid biosynthesis
BP3768	putative histidinol dehydrogenase	Amino acid biosynthesis
BP3773	histidine biosynthesis protein	Amino acid biosynthesis
BP3776	MttA/Hcf106 family protein	Cell surface
BP3779	putative Sec-independent protein translocase protein	Transport/binding proteins
BP3783	pertussis toxin subunit 1 precursor	Pathogenicity
BP3785	pertussis toxin subunit 4 precursor	Pathogenicity
BP3786	pertussis toxin subunit 5 precursor	Pathogenicity
BP3787	pertussis toxin subunit 3 precursor	Pathogenicity
BP3791	putative membrane protein	Cell surface
BP3795	putative bacterial secretion system protein	Transport/binding proteins
BP3796	putative bacterial secretion system protein	Transport/binding proteins
BP3799	conserved hypothetical protein	Conserved hypothetical
BP3805	N-terminal region of a probable ABC transporter, ATP-binding protein (Pseudogene)	Pseudogenes
BP3807	arginine biosynthesis bifunctional protein	Amino acid biosynthesis
BP3808	conserved hypothetical protein	Conserved hypothetical
BP3809	conserved hypothetical protein	Conserved hypothetical
BP3820	putative regulatory protein	Regulation
BP3821	pantoate--beta-alanine ligase	Miscellaneous
BP3828	putative amino acid ABC transporter ATP-binding protein	Transport/binding proteins
BP3829	putative amino acid ABC transporter permease protein	Transport/binding proteins
BP3830	putative amino acid ABC transporter permease protein	Transport/binding proteins
BP3834	conserved hypothetical protein	Conserved hypothetical
BP3835	putative pyruvate ferredoxin/flavodoxin oxidoreductase (pseudogene)	Pseudogenes
BP3847	putative hydroxymethylglutaryl-CoA lyase	Small molecule degradation
BP3849	conserved hypothetical protein	Conserved hypothetical
BP3852	catalase	Protection responses
BP3857	putative hydrolase	Miscellaneous
BP3858	putative transport ATP-binding protein	Transport/binding proteins
BP3862	putative extracellular solute-binding protein	Cell surface
BPP0529	putative exported protein	Unknown
BPP0824	putative exported protein	Unknown
BPP0825	putative TetR-family transcriptional regulator	Regulatory functions
BPP0826	putative membrane protein	Hypothetical proteins
BPP0827	putative membrane protein	Transport/binding proteins
BPP0931	putative GntR-family transcriptional regulator	Regulatory functions
BPP0941	putative transcriptional regulator	Regulatory functions
BPP0943	conserved hypothetical protein	Regulatory functions
BPP0944	acetyl-CoA synthetase	Central/intermediary metabolism
BPP2180	Putative solute-binding protein	Unknown
BPP2186	Putative decarboxylase	Unknown
BPP2341	Putative 3-hydroxyacyl-CoA dehydrogenase oxidoreductase	Fatty acid metabolism
BPP2343	Putative enoyl-CoA hydratasee	Fatty acid metabolism
BPP2344	Putative thiolase	Hypothetical proteins
BPP2721	D-amino acid dehydrogenase small subunit	Unknown
BPP2725	Putative enoyl-CoA isomerase	Unknown
BPP2733	Putative exported protein	Unknown
BPP3040	putative LysR-family transcriptional regulator	Unknown
BPP3515	conserved putative exported protein	Unknown
BPP4203	putative membrane protein	Unknown
BPP4207	haloacid dehalogenase-like hydrolase	Unknown
BPP4298	putative lipoprotein	Unknown
BPP4300	putative glutaredoxin	Energy metabolism
BPP4391	conserved hypothetical protein	Unknown
BB2751	putative monooxygenase	Unknown
BB2754	putative dioxygenase	Unknown
BB2757	permease component of ABC transporter protein	Transport/binding proteins
BB2759	ATP-binding component of ABC transporter protein	Transport/binding proteins
BB3508	phage-related hypothetical protein	Phage-related or transposon-related
BPr02	#N/A	Ribosome constituents
BPt30	#N/A	Ribosome constituents
